# Supplementary material for: Constructing densely functionalized Hajos–Parrish-type ketones with six contiguous stereogenic centers and two quaternary carbons in a formal [2 + 2 + 2] cycloaddition cascade
Source: Royal Society of Chemistry journal article supplement (doi:10.1039/c6ra22430j), 2016-01-01
Supplement: c6ra22430j1.pdf [file c6ra22430j1.pdf]

## Supporting Information

# Constructing Densely Functionalized Hajos–Parrish–type Ketones with Six Contiguous Stereogenic Centers and Two Quaternary Carbons in a formal [2 + 2 + 2] Cycloaddition Cascade.

Chieh-Hung Peng,<sup>†</sup> Bor-Cherng Hong,<sup>\*,†</sup> Arun Raja,<sup>†</sup> Chun-Wei Chang,<sup>†</sup> and Gene-Hsiang Lee<sup>‡</sup>

<sup>†</sup>Department of Chemistry and Biochemistry, National Chung Cheng University, Chia-Yi, 621, Taiwan, R.O.C.

<sup>‡</sup>Instrumentation Center, National Taiwan University, Taipei, 106, Taiwan, R.O.C.

*chebch@ccu.edu.tw*

### SUPPORTING INFORMATION (Contents):

|                                                                                                   |              |
|---------------------------------------------------------------------------------------------------|--------------|
| (1) Experimental procedure and characterization data for compounds <b>3a</b> and <b>5a</b> .....  | Page 2–6     |
| (2) Experimental procedure and characterization data for compounds <b>4a</b> .....                | Page 7       |
| (3) Experimental procedure and characterization data for compounds <b>3b</b> and <b>5b</b> .....  | Page 8–9     |
| (4) Experimental procedure and characterization data for compounds <b>3c</b> and <b>5c</b> .....  | Page 9–10    |
| (5) Experimental procedure and characterization data for compounds <b>3d</b> and <b>5d</b> .....  | Page 10–11   |
| (6) Experimental procedure and characterization data for compounds <b>3e</b> and <b>5e</b> .....  | Page 12      |
| (7) Experimental procedure and characterization data for compounds <b>3f</b> and <b>5f</b> .....  | Page 13–15   |
| (8) Experimental procedure and characterization data for compounds <b>3g</b> and <b>5g</b> .....  | Page 16–17   |
| (9) Experimental procedure and characterization data for compounds <b>3h</b> and <b>5h</b> .....  | Page 17–18   |
| (10) Experimental procedure and characterization data for compounds <b>3i</b> and <b>5i</b> ..... | Page 18–26   |
| (11) NMR Spectra of compound <b>3a</b> .....                                                      | Page 27–32   |
| (12) NMR Spectra of compound <b>5a</b> .....                                                      | Page 33–39   |
| (13) NMR Spectra of compound <b>3b</b> .....                                                      | Page 40–45   |
| (14) NMR Spectra of compound <b>5b</b> .....                                                      | Page 46–51   |
| (15) NMR Spectra of compound <b>5c</b> .....                                                      | Page 52–57   |
| (16) NMR Spectra of compound <b>5c</b> .....                                                      | Page 58–63   |
| (17) NMR Spectra of compound <b>3d</b> .....                                                      | Page 64–70   |
| (18) NMR Spectra of compound <b>5d</b> .....                                                      | Page 71–77   |
| (19) NMR Spectra of compound <b>3e</b> .....                                                      | Page 78–83   |
| (20) NMR Spectra of compound <b>5e</b> .....                                                      | Page 84–89   |
| (21) NMR Spectra of compound <b>3f</b> .....                                                      | Page 90–95   |
| (22) NMR Spectra of compound <b>5f</b> .....                                                      | Page 96–102  |
| (23) NMR Spectra of compound <b>3g</b> .....                                                      | Page 103–108 |
| (24) NMR Spectra of compound <b>5g</b> .....                                                      | Page 109–114 |
| (25) NMR Spectra of compound <b>3h</b> .....                                                      | Page 115–120 |
| (26) NMR Spectra of compound <b>5h</b> .....                                                      | Page 121–126 |
| (27) NMR Spectra of compound <b>3i</b> .....                                                      | Page 127–139 |
| (28) NMR Spectra of compound <b>5i</b> .....                                                      | Page 140–145 |
| (29) NMR Spectra of compound <b>4a</b> .....                                                      | Page 146–148 |
| (30) HPLC analysis .....                                                                          | Page 149–201 |

**General Procedure.** All solvents were reagent grade. Reactions were normally carried out under nitrogen atmosphere in glassware. Merck silica gel 60 (particle size 0.04-0.063 mm) was employed for flash chromatography. Melting points are uncorrected. <sup>1</sup>H NMR spectra were obtained in CDCl<sub>3</sub> unless otherwise noted at 400 MHz (Bruker DPX-400) or 500 MHz (Varian-Unity INOVA-500). <sup>13</sup>C

NMR spectra were obtained at 100 MHz or 125 MHz. *E.e.* values were measured by HPLC on a chiral column (chiralpak IC, 0.46 cm ID x 25 cm, particle size 5  $\mu$ ) by elution with THF-hexane. The flow rate of the indicated elution solvent is maintained at 1 mL/min, and the retention time of a compound is recorded accordingly. HPLC was equipped with the ultraviolet and refractive index detectors. The melting point was recorded on a melting point apparatus (MPA100 – Automated melting point system, Stanford Research Systems, Inc.) and is uncorrected.

### Preparation of adduct **3a** and **5a**.

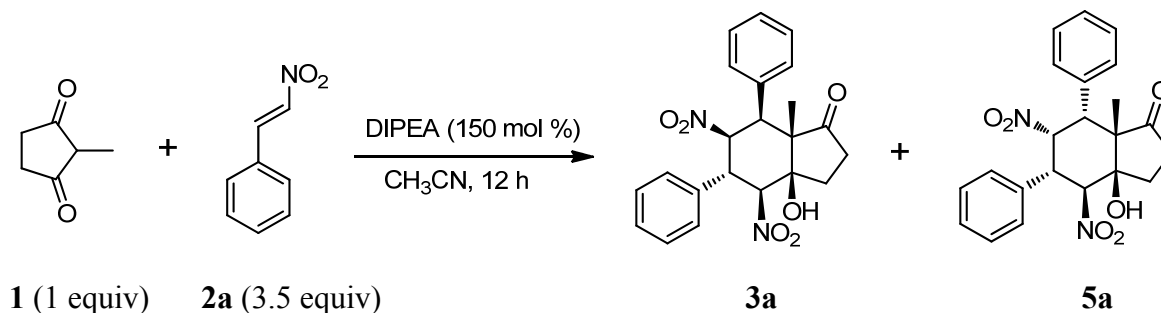

To a solution of DIPEA (44 mg, 0.34 mmol, 1.5 equiv), 2-methyl-1,3-cyclopentanone (**1**, 25 mg, 0.22 mmol) in  $\text{CH}_3\text{CN}$  (1.1 mL) was added nitrostyrene (**2a**, 116.3 mg, 0.78 mmol, 3.5 equiv) and the resulting solution was stirred at room temperature for 12 h until the completion of the reaction, as monitored by TLC. Then the reaction mixture was directly filtered through a Celite bed (to remove insoluble polymer junk) and washed with EtOAc (15 mL). The filtrate was concentrated *in vacuo* and the crude product was purified by flash column chromatography with 20 % EtOAc–hexane to give **3a** (58.5 mg, 64% yield) as a pale yellow solid ( $R_f = 0.23$  in 20% EtOAc–hexane developed two times on TLC) and **5a** (13.7 mg, 15%) as white solid ( $R_f = 0.19$  in 20% EtOAc–hexane developed two times on TLC).

Select data for **3a**: m.p. 240–241  $^\circ\text{C}$ ; IR (neat): 3441, 2919, 1740, 1556, 1454, 1364, 1073, 756, 701, 463  $\text{cm}^{-1}$ ;  $^1\text{H}$  NMR (500 MHz, acetone- $d_6$ ):  $\delta$  7.50 – 7.42 (m, 2 H), 7.40 – 7.32 (m, 4 H), 7.28 – 7.15 (m, 4 H), 5.93 (s, 1 H), 5.21 (d,  $J = 12.5$  Hz, 1 H), 5.14 (dd,  $J = 12.5, 6.5$  Hz, 1 H), 4.50 (t,  $J = 12.5$  Hz, 1 H), 4.15 (d,  $J = 6.5$  Hz, 1 H), 2.91 – 2.80 (m, 2 H), 2.76 – 2.68 (m, 1 H), 2.34 – 2.25 (m, 1 H), 0.96 (s, 3 H);  $^{13}\text{C}$  NMR (125 MHz, acetone- $d_6$ ):  $\delta$  214.5 (C), 137.1 (C), 135.6 (C), 129.3 (6 CH), 128.94 (2 CH), 128.90 (2 CH), 92.7 (CH), 89.3 (CH), 79.8 (C), 58.0 (C), 50.2 (CH), 41.5 (CH), 34.1 ( $\text{CH}_2$ ), 28.9 ( $\text{CH}_2$ ), 19.3 ( $\text{CH}_3$ ); MS ( $m/z$ , relative intensity): 410 ( $\text{M}^+$ , 18), 364 (15), 318 (52), 257 (81), 245 (45), 205 (21), 115 (51), 105 (35), 91 (100), 77 (34); exact mass calculated for  $\text{C}_{22}\text{H}_{22}\text{N}_2\text{O}_6$  ( $\text{M}^+$ ): 410.1478; found: 410.1477. Anal. Calcd for  $\text{C}_{22}\text{H}_{22}\text{N}_2\text{O}_6$ : C, 64.38; H, 5.40; N, 6.83; O, 23.39; found: C, 64.45; H, 5.36; N, 6.56; O, 23.26.

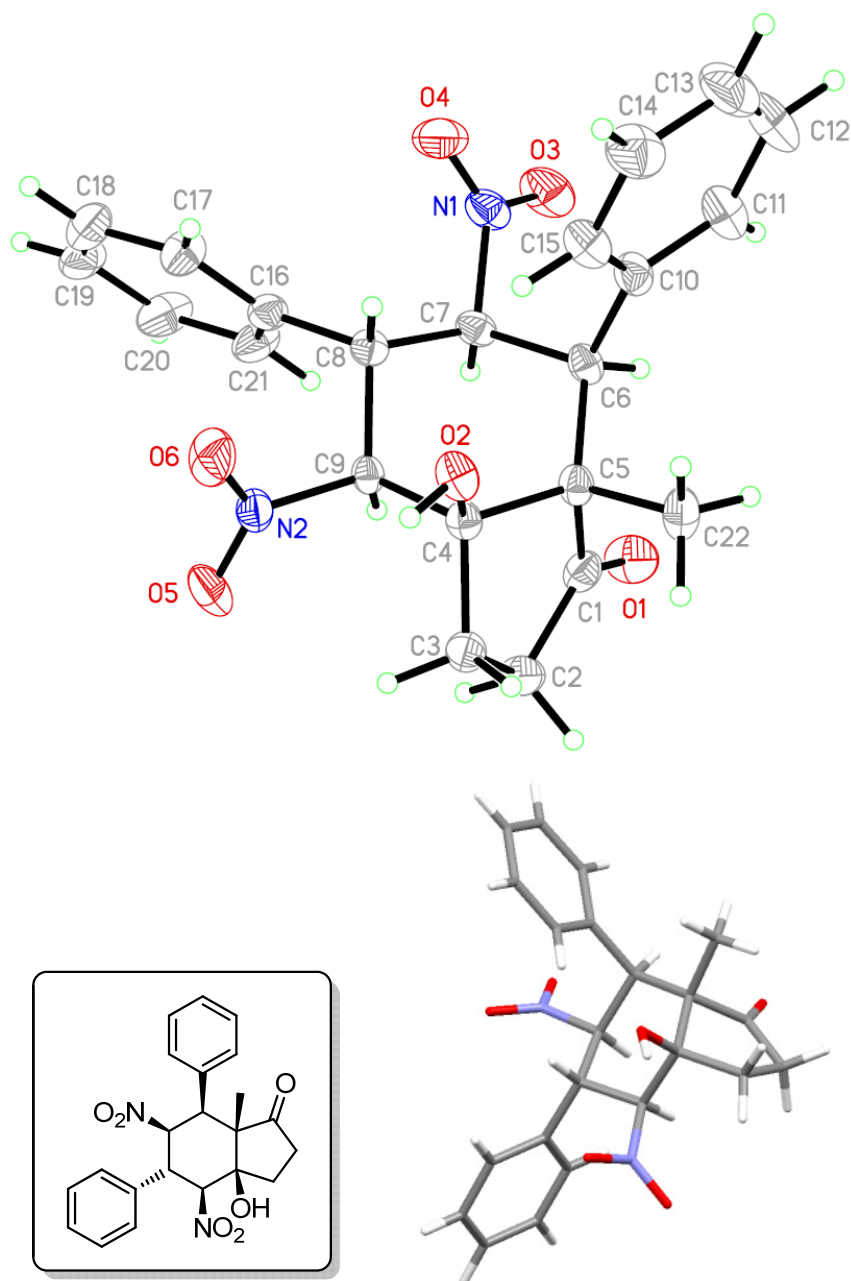

**Figure S1.** ORTEP and Stereo plots for X-ray crystal structures of (±)-**3a**.

CCDC 1474917 contains the supplementary crystallographic data for (±)-**3a**. These data can be obtained free of charge from the Cambridge Crystallographic Data Centre via [www.ccdc.cam.ac.uk/data\\_request/cif](http://www.ccdc.cam.ac.uk/data_request/cif).

**Table S1.** Crystal data and structure refinement for ( $\pm$ )-**3a**.

|                                   |                                                               |                   |
|-----------------------------------|---------------------------------------------------------------|-------------------|
| Identification code               | ic17001                                                       |                   |
| Empirical formula                 | C <sub>22</sub> H <sub>22</sub> N <sub>2</sub> O <sub>6</sub> |                   |
| Formula weight                    | 410.42                                                        |                   |
| Temperature                       | 200(2) K                                                      |                   |
| Wavelength                        | 0.71073 Å                                                     |                   |
| Crystal system                    | Monoclinic                                                    |                   |
| Space group                       | P2(1)/c                                                       |                   |
| Unit cell dimensions              | a = 11.4563(7) Å                                              | a = 90°.          |
|                                   | b = 6.7710(4) Å                                               | b = 93.8075(14)°. |
|                                   | c = 25.4114(15) Å                                             | g = 90°.          |
| Volume                            | 1966.8(2) Å <sup>3</sup>                                      |                   |
| Z                                 | 4                                                             |                   |
| Density (calculated)              | 1.386 Mg/m <sup>3</sup>                                       |                   |
| Absorption coefficient            | 0.102 mm <sup>-1</sup>                                        |                   |
| F(000)                            | 864                                                           |                   |
| Crystal size                      | 0.40 x 0.27 x 0.05 mm <sup>3</sup>                            |                   |
| Theta range for data collection   | 1.61 to 27.50°.                                               |                   |
| Index ranges                      | -14 ≤ h ≤ 14, -8 ≤ k ≤ 8, -32 ≤ l ≤ 33                        |                   |
| Reflections collected             | 14689                                                         |                   |
| Independent reflections           | 4514 [R(int) = 0.0417]                                        |                   |
| Completeness to theta = 27.50°    | 100.0 %                                                       |                   |
| Absorption correction             | Semi-empirical from equivalents                               |                   |
| Max. and min. transmission        | 0.9949 and 0.9604                                             |                   |
| Refinement method                 | Full-matrix least-squares on F <sup>2</sup>                   |                   |
| Data / restraints / parameters    | 4514 / 0 / 273                                                |                   |
| Goodness-of-fit on F <sup>2</sup> | 1.109                                                         |                   |
| Final R indices [I > 2σ(I)]       | R1 = 0.0586, wR2 = 0.1365                                     |                   |
| R indices (all data)              | R1 = 0.0758, wR2 = 0.1460                                     |                   |
| Largest diff. peak and hole       | 0.394 and -0.209 e.Å <sup>-3</sup>                            |                   |



Select data for **5a**: m.p. 184–185 °C;  $^1\text{H}$  NMR (500 MHz, acetone- $d_6$ ):  $\delta$  7.56 – 7.54 (m, 2 H), 7.37 – 7.30 (m, 2 H), 7.29 – 7.22 (m, 6 H), 6.18 (d,  $J$  = 13.0 Hz, 1 H), 5.47 (s, 1 H), 5.18 (dd,  $J$  = 4.5 Hz, 4.0 Hz, 1 H), 4.58 (dd,  $J$  = 12.5 Hz, 4.5 Hz, 1 H), 3.74 (d,  $J$  = 4.0 Hz, 1 H), 3.08 – 3.01 (m, 1 H), 2.79 – 2.75 (m, 1 H), 2.65 (dd,  $J$  = 19.0 Hz, 9.0 Hz, 1 H), 2.31 – 2.24 (m, 1 H), 1.11 (s, 3 H);  $^{13}\text{C}$  NMR (125 MHz, acetone- $d_6$ ):  $\delta$  211.8 (C), 136.8 (C), 136.7 (C), 132.2 (2 CH), 129.9 (2 CH), 129.2 (CH), 128.9 (2 CH), 128.7 (CH), 128.0 (2 CH), 93.5 (CH), 87.5 (CH), 80.2 (C), 55.8 (C), 50.3 (CH), 44.1 (CH), 35.7 (CH $_2$ ), 28.8 (CH $_2$ ), 21.6 (CH $_3$ ).

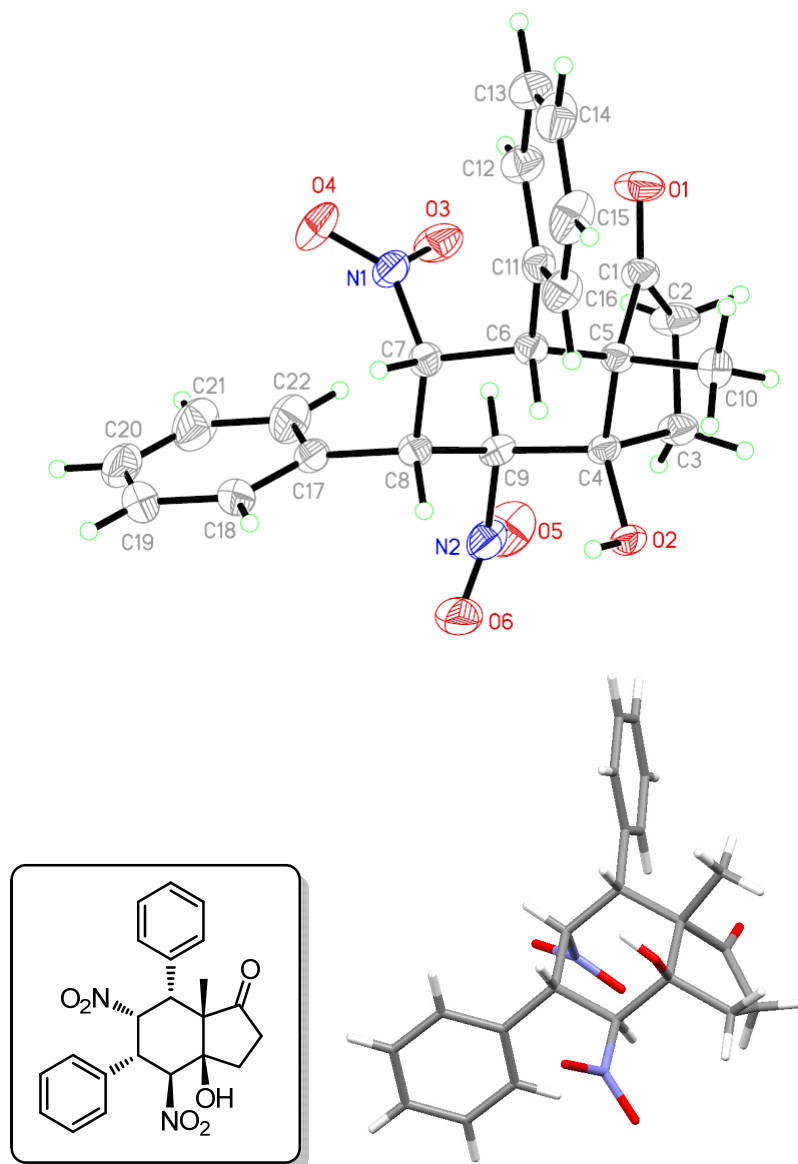

**Figure S2.** ORTEP and Stereo plots for X-ray crystal structures of (±)-**5a**.

CCDC 1495243 contains the supplementary crystallographic data for (±)-**5a**. These data can be obtained free of charge from the Cambridge Crystallographic Data Centre via [www.ccdc.cam.ac.uk/data\\_request/cif](http://www.ccdc.cam.ac.uk/data_request/cif).

**Table S2.** Crystal data and structure refinement for (±)-**5a**.

|                                   |                                                               |          |
|-----------------------------------|---------------------------------------------------------------|----------|
| Identification code               | ic18058-1                                                     |          |
| Empirical formula                 | C <sub>22</sub> H <sub>22</sub> N <sub>2</sub> O <sub>6</sub> |          |
| Formula weight                    | 410.41                                                        |          |
| Temperature                       | 200(2) K                                                      |          |
| Wavelength                        | 1.54178 Å                                                     |          |
| Crystal system                    | Orthorhombic                                                  |          |
| Space group                       | P2 <sub>1</sub> 2 <sub>1</sub> 2 <sub>1</sub>                 |          |
| Unit cell dimensions              | a = 6.60530(10) Å                                             | a = 90°. |
|                                   | b = 16.3208(3) Å                                              | b = 90°. |
|                                   | c = 18.4301(3) Å                                              | g = 90°. |
| Volume                            | 1986.83(6) Å <sup>3</sup>                                     |          |
| Z                                 | 4                                                             |          |
| Density (calculated)              | 1.372 Mg/m <sup>3</sup>                                       |          |
| Absorption coefficient            | 0.838 mm <sup>-1</sup>                                        |          |
| F(000)                            | 864                                                           |          |
| Crystal size                      | 0.506 x 0.150 x 0.065 mm <sup>3</sup>                         |          |
| Theta range for data collection   | 3.617 to 69.976°.                                             |          |
| Index ranges                      | -7 ≤ h ≤ 8, -16 ≤ k ≤ 19, -22 ≤ l ≤ 22                        |          |
| Reflections collected             | 9468                                                          |          |
| Independent reflections           | 3755 [R(int) = 0.0198]                                        |          |
| Completeness to theta = 67.679°   | 99.9 %                                                        |          |
| Absorption correction             | Semi-empirical from equivalents                               |          |
| Max. and min. transmission        | 0.7533 and 0.5874                                             |          |
| Refinement method                 | Full-matrix least-squares on F <sup>2</sup>                   |          |
| Data / restraints / parameters    | 3755 / 0 / 273                                                |          |
| Goodness-of-fit on F <sup>2</sup> | 1.065                                                         |          |
| Final R indices [I > 2σ(I)]       | R1 = 0.0318, wR2 = 0.0793                                     |          |
| R indices (all data)              | R1 = 0.0326, wR2 = 0.0800                                     |          |
| Absolute structure parameter      | 0.52(5)                                                       |          |
| Extinction coefficient            | n/a                                                           |          |
| Largest diff. peak and hole       | 0.151 and -0.225 e.Å <sup>-3</sup>                            |          |

Isolation of the intermediate **4a**.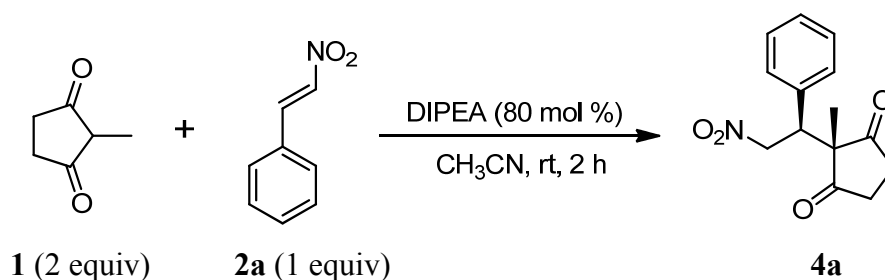

To a solution of DIPEA (62 mg, 0.48 mmol, 0.8 equiv), 2-methyl-1,3-cyclopentanone (**1**, 135 mg, 1.20 mmol, 2 equiv) in CH<sub>3</sub>CN (6 mL) was added nitrostyrene (**2a**, 90 mg, 0.60 mmol) and the resulting solution was stirred at room temperature for 2 h. The reaction mixture was concentrated *in vacuo* to give the residue. The crude product was purified by flash column chromatography with 10 to 20 % EtOAc–hexane ( $R_f = 0.29$  in 25 % EtOAc–hexane) to afford product **4a** (35 mg, 22% yield) as a yellow oil. Selected data for **4a**: IR (neat): 3035, 2973, 2924, 1722, 1555, 1454, 1416, 1379, 1344, 1076, 799, 762, 704 cm<sup>-1</sup>; <sup>1</sup>H NMR (400 MHz, CDCl<sub>3</sub>, ppm):  $\delta$  7.28–7.23 (m, 3 H), 7.16 – 7.13 (m, 2 H), 5.04 (dd,  $J = 13.2, 9.6$  Hz, 1 H), 4.95 (d,  $J = 13.2, 6.0$  Hz, 1 H), 3.92 (dd,  $J = 9.7, 6.0$  Hz, 1 H), 2.72–2.51 (m, 2 H), 2.39–2.21 (m, 1 H), 2.10 – 1.90 (m, 1 H), 1.18 (s, 3 H); <sup>13</sup>C NMR (100 MHz, CDCl<sub>3</sub>, ppm):  $\delta$  216.3 (C), 214.6 (C), 135.0 (C), 129.1 (2CH), 128.7 (2CH), 128.6 (CH), 74.8 (CH<sub>2</sub>), 57.9 (C), 47.8 (CH), 35.5 (CH<sub>2</sub>), 35.0 (CH<sub>2</sub>), 19.4 (CH<sub>3</sub>); MS ( $m/z$ , relative intensity): 261 ( $M^+$ , 1), 215 (4), 186 (20), 171 (21), 149 (58), 131 (100), 104 (71), 103 (47), 102 (69), 91 (100), 77 (64); exact mass calculated for C<sub>14</sub>H<sub>15</sub>NO<sub>4</sub> ( $M^+$ ): 261.1001; found: 261.1003.

### Preparation of adduct **3b** and **5b**.

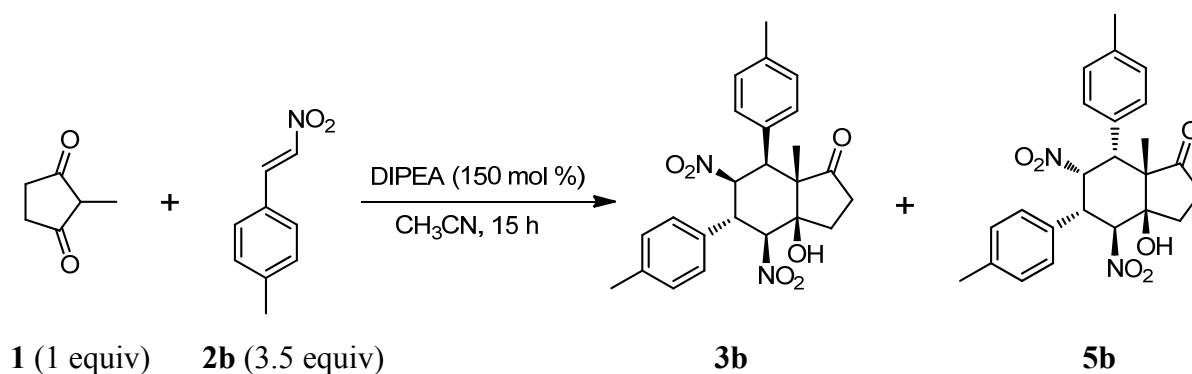

To a solution of DIPEA (44 mg, 0.34 mmol, 1.5 equiv), 2-methyl-1,3-cyclopentanone (**1**, 25 mg, 0.22 mmol) in CH<sub>3</sub>CN (1.1 mL) was added nitrostyrene (**2b**, 127.3 mg, 0.78 mmol, 3.5 equiv) and the resulting solution was stirred at room temperature for 15 h until the completion of the reaction, as monitored by TLC. Then the reaction mixture was directly filtered through a Celite bed (to remove insoluble polymer junk) and washed with EtOAc (15 mL). The filtrate was concentrated *in vacuo* and the crude product was purified by flash column chromatography with 20 % EtOAc–hexane to afford **3b** (39.8 mg, 41% yield) as white solid ( $R_f = 0.29$  in 20% EtOAc–hexane, developed two times on TLC) and **5b** (6.8 mg, 7%) as white solid ( $R_f = 0.23$  in 20% EtOAc–hexane developed two times on TLC).

Select data for **3b**: m.p. 195–196 °C; IR (neat): 3550–3250, 2923, 2852, 1739, 1559, 1514, 1466, 1365, 1316, 1299, 1072, 809, 734 cm<sup>-1</sup>; <sup>1</sup>H NMR (500 MHz, CD<sub>3</sub>CN):  $\delta$  7.23 (d,  $J = 7.5$  Hz, 2 H), 7.23 – 7.10 (m, 4 H), 7.08 (d,  $J = 7.5$  Hz, 2 H), 4.92 – 4.87 (m, 1 H), 4.79 (d,  $J = 12.0$  Hz, 1 H), 4.55 – 4.53 (m, 1 H), 4.35 (dd,  $J = 12.5, 12.5$  Hz, 1 H), 4.04 (d,  $J = 6.5$  Hz, 1 H), 2.89 – 2.81 (m, 1 H), 2.80 – 2.70 (m, 1 H), 2.57 (dd,  $J = 13.0$  Hz, 9.0 Hz, 1 H), 2.31 (s, 3 H), 2.20 (s, 3 H), 2.18 – 2.09 (m, 1 H), 0.89 (s, 3 H); <sup>13</sup>C NMR (125 MHz, CD<sub>3</sub>CN):  $\delta$  214.9 (C), 139.4 (C), 139.0 (C), 133.7 (C), 132.3 (C), 130.2 (4 CH), 130.1 (4 CH), 93.0 (CH), 89.5 (CH), 79.9 (C), 58.2 (C), 49.8 (CH), 41.1 (CH), 34.5 (CH<sub>2</sub>), 28.9 (CH<sub>2</sub>), 21.13 (CH<sub>3</sub>), 21.09 (CH<sub>3</sub>), 19.2 (CH<sub>3</sub>); MS ( $m/z$ , relative intensity): 438 (M<sup>+</sup>, 2), 349 (9), 326 (5), 279 (9), 219 (73), 163 (32), 129 (33), 115 (100), 105 (83), 91 (79); exact mass calculated for C<sub>24</sub>H<sub>26</sub>N<sub>2</sub>O<sub>6</sub> (M<sup>+</sup>): 438.1791; found: 438.1790.

Select data for **5b**: m.p. 164–165 °C; <sup>1</sup>H NMR (500 MHz, CD<sub>3</sub>CN):  $\delta$  7.33 (d,  $J = 8.5$  Hz, 2 H), 7.16 – 7.11 (m, 6 H), 6.01 (d,  $J = 12.5$  Hz, 1 H), 4.94 (dd,  $J = 4.5$  Hz, 4.5 Hz, 1 H), 4.30 (dd,  $J = 13.0$  Hz, 4.5 Hz, 1 H), 4.22 (br.s, 1 H), 3.50 (d,  $J = 4.0$  Hz, 1 H), 2.98 – 2.89 (m, 1 H),

2.66 – 2.56 (m, 2 H), 2.33 – 2.24 (m, 1 H), 2.30 (s, 3 H), 2.27 (s, 3 H), 1.0 (s, 3 H);  $^{13}\text{C}$  NMR (125 MHz,  $\text{CD}_3\text{CN}$ ):  $\delta$  212.7 (C), 139.7 (C), 138.9 (C), 133.5 (C), 133.4 (C), 132.1 (2 CH), 130.8 (2 CH), 129.8 (2 CH), 128.0 (2 CH), 93.6 (CH), 87.7 (CH), 80.4 (C), 55.8 (C), 49.6 (CH), 43.6 (CH), 35.9 ( $\text{CH}_2$ ), 28.8 ( $\text{CH}_2$ ), 21.6 ( $\text{CH}_3$ ), 21.11 ( $\text{CH}_3$ ), 21.09 ( $\text{CH}_3$ ).

### Preparation of adduct **3c** and **5c**.

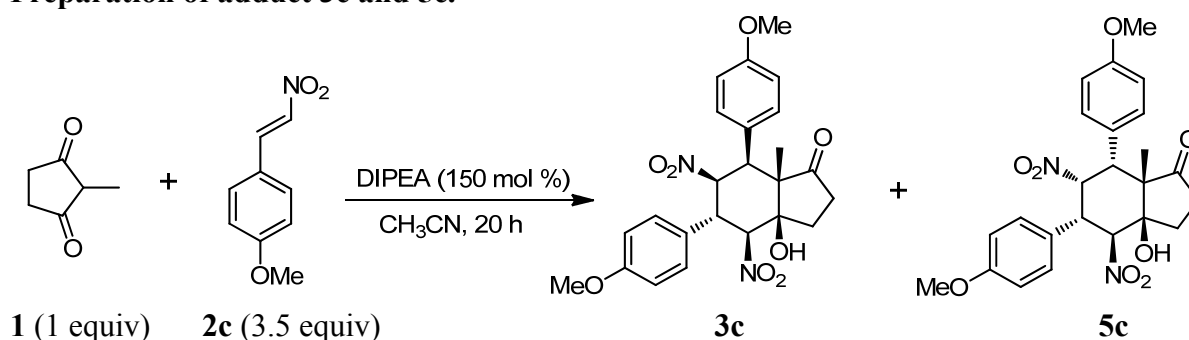

To a solution of DIPEA (44 mg, 0.34 mmol, 1.5 equiv), 2-methyl-1,3-cyclopentanedione (**1**, 25 mg, 0.22 mmol) in  $\text{CH}_3\text{CN}$  (1.1 mL) was added nitrostyrene (**2c**, 139 mg, 0.78 mmol, 3.5 equiv) and the resulting solution was stirred at room temperature for 20 h until the completion of the reaction, as monitored by TLC. Then the reaction mixture was directly filtered through a Celite bed (to remove insoluble polymer junk) and washed with EtOAc (15 mL). The filtrate was concentrated *in vacuo* and the crude product was purified by flash column chromatography with 20 % EtOAc–hexane to afford **3c** (21.5 mg, 20% yield) as white solid ( $R_f = 0.13$  in 20% EtOAc–hexane, developed two times on TLC) and **5c** (4.2 mg, 4%) as a pale yellow solid ( $R_f = 0.09$  in 20% EtOAc–hexane developed two times on TLC).

Select data for **3c**: m.p. 196–197 °C; IR (neat): 3550–3250, 2923, 2852, 1740, 1558, 1364, 1299, 1073, 1027, 811, 735  $\text{cm}^{-1}$ ;  $^1\text{H}$  NMR (500 MHz,  $\text{CDCl}_3$ ):  $\delta$  7.09 (d,  $J = 8.5$  Hz, 2 H), 6.87 – 6.80 (m, 4 H), 6.76 (d,  $J = 8.5$  Hz, 2 H), 4.83 (dd,  $J = 12.0, 7.0$  Hz, 1 H), 4.48 (d,  $J = 12.0$  Hz, 1 H), 4.36 (dd,  $J = 12.5, 12.0$  Hz, 1 H), 4.16 (d,  $J = 6.5$  Hz, 1 H), 3.78 (s, 3 H), 3.69 (s, 3 H), 3.46 (s, 1 H), 2.88 (dd,  $J = 20.0$  Hz, 10.5 Hz, 1 H), 2.62 – 2.53 (m, 1 H), 2.31 (dd,  $J = 13.5$  Hz, 9.5 Hz, 1 H), 2.22 – 2.14 (m, 1 H), 0.98 (s, 3 H);  $^{13}\text{C}$  NMR (125 MHz,  $\text{CDCl}_3$ ):  $\delta$  212.8 (C), 159.7 (C), 159.5 (C), 132.5 (2 CH), 125.6 (C), 125.3 (C), 114.5 (2 CH), 114.0 (2 CH), 92.7 (CH), 87.9 (CH), 78.2 (C), 57.2 (C), 55.2 ( $\text{CH}_3$ ), 55.1 ( $\text{CH}_3$ ), 47.5 (CH),

39.9 (CH), 33.9 (CH<sub>2</sub>), 28.8 (CH<sub>2</sub>), 18.3 (CH<sub>3</sub>), some aryl carbons are broadened and disappeared due to the slow rotation and coalescence phenomenon; MS (*m/z*, relative intensity): 470 (M<sup>+</sup>, 11), 397 (14), 355 (19), 267 (17), 253 (17), 179 (19), 135 (100), 121 (75), 73 (60); exact mass calculated for C<sub>24</sub>H<sub>26</sub>N<sub>2</sub>O<sub>8</sub> (M<sup>+</sup>): 470.1689; found: 470.1689.

Select data for **5c**: mp 103–104 °C; <sup>1</sup>H NMR (500 MHz, CDCl<sub>3</sub>): δ 7.31 (d, *J* = 9.0 Hz, 2 H), 7.07 (d, *J* = 8.5 Hz, 2 H), 6.90 – 6.78 (m, 4 H), 6.13 (d, *J* = 12.5 Hz, 1 H), 4.84 (dd, *J* = 4.5 Hz, 4.0 Hz, 1 H), 4.11 (dd, *J* = 13.0 Hz, 4.5 Hz, 1 H), 3.77 (s, 3 H), 3.73 (s, 3 H), 3.36 (s, 1 H), 3.35 (d, *J* = 16.0 Hz, 1 H), 2.90 – 2.82 (m, 1 H), 2.70 – 2.60 (m, 1 H), 2.36 – 2.30 (m, 1 H), 2.20 – 2.14 (m, 1 H), 1.11 (s, 3 H); <sup>13</sup>C NMR (125 MHz, CDCl<sub>3</sub>): δ 209.8 (C), 160.0 (C), 159.6 (C), 132.0 (2 CH), 128.4 (2 CH), 125.9 (C), 124.8 (C), 114.9 (2 CH), 113.8 (2 CH), 92.4 (CH), 87.1 (CH), 78.8 (C), 55.20 (CH<sub>3</sub>), 55.19 (CH<sub>3</sub>), 54.6 (C), 49.1 (CH), 43.6 (CH), 35.2 (CH<sub>2</sub>), 29.0 (CH<sub>2</sub>), 20.8 (CH<sub>3</sub>).

#### Preparation of adduct **3d** and **5d**.

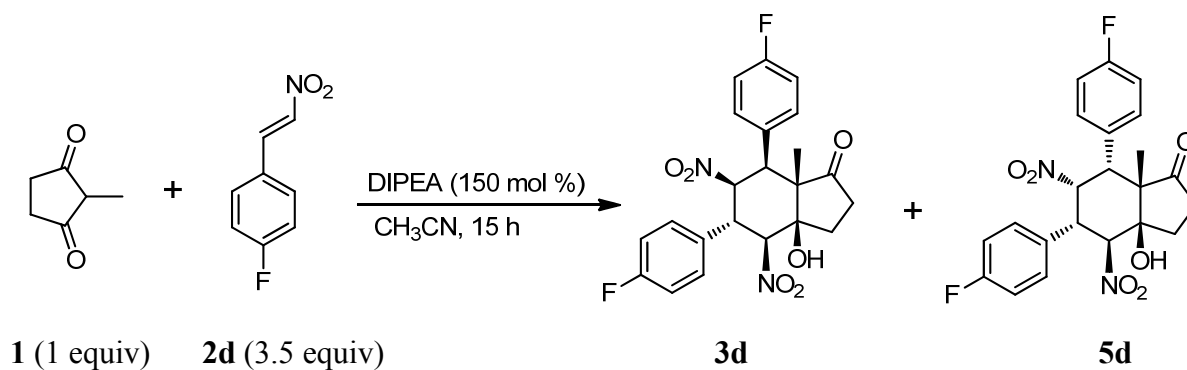

To a solution of DIPEA (44 mg, 0.34 mmol, 1.5 equiv), 2-methyl-1,3-cyclopentanedione (**1**, 25 mg, 0.22 mmol) in CH<sub>3</sub>CN (1.1 mL) was added nitrostyrene (**2d**, 130.2 mg, 0.78 mmol, 3.5 equiv) and the resulting solution was stirred at room temperature for 15 h until the completion of the reaction, as monitored by TLC. Then the reaction mixture was directly filtered through a Celite bed (to remove insoluble polymer junk) and washed with EtOAc (15 mL). The filtrate was concentrated *in vacuo* and the crude product was purified by flash column chromatography with 20 % EtOAc–hexane to afford **3d** (59.7 mg, 60% yield) as

white solid ( $R_f = 0.19$  in 20% EtOAc–hexane, developed two times on TLC) and **5d** (7.0 mg, 7% yield) as a pale yellow solid ( $R_f = 0.13$  in 20% EtOAc–hexane developed two times on TLC). Select data for **3d**: m.p. 208–209 °C; IR (neat): 3550–3200, 2922, 2852, 1740, 1606, 1558, 1512, 1364, 1233, 1164, 840, 735  $\text{cm}^{-1}$ ;  $^1\text{H}$  NMR (500 MHz,  $\text{CD}_3\text{CN}$ ):  $\delta$  7.42 – 7.39 (m, 2 H), 7.18 – 7.03 (m, 4 H), 7.01 (dd,  $J = 9.0$  Hz, 9.0 Hz, 2 H), 4.91 (dd,  $J = 12.5$ , 6.5 Hz, 1 H), 4.80 (d,  $J = 12.0$  Hz, 1 H), 4.55 (s, 1 H), 4.38 (dd,  $J = 12.0$ , 12.0 Hz, 1 H), 4.12 (d,  $J = 6.5$  Hz, 1 H), 2.90 – 2.82 (m, 1 H), 2.80 – 2.70 (m, 1 H), 2.61 – 2.56 (m, 1 H), 2.20 – 2.11 (m, 1 H), 0.90 (s, 3 H);  $^{13}\text{C}$  NMR (125 MHz,  $\text{CD}_3\text{CN}$ ):  $\delta$  214.4 (C), 163.7 (d,  $J = 243.9$  Hz, C), 163.4 (d,  $J = 244.4$  Hz, C), 134.5 (2 CH), 132.6 (d,  $J = 3.4$  Hz, C), 131.4 (d,  $J = 3.4$  Hz, C), 116.4 (d,  $J = 21.6$  Hz, 2 CH), 116.2 (d,  $J = 21.3$  Hz, 2 CH), 92.6 (CH), 89.2 (CH), 80.0 (C), 58.1 (C), 49.3 (CH), 40.7 (CH), 34.4 ( $\text{CH}_2$ ), 28.8 ( $\text{CH}_2$ ), 19.1 ( $\text{CH}_3$ ), two aryl carbons and two aryl protons are broadened and disappeared due to the slow rotation and coalescence phenomenon; MS ( $m/z$ , relative intensity): 446 ( $\text{M}^+$ , 11), 400 (5), 354 (20), 293 (34), 281 (21), 227 (17), 133 (35), 123 (84), 109 (100); exact mass calculated for  $\text{C}_{22}\text{H}_{20}\text{F}_2\text{N}_2\text{O}_6$  ( $\text{M}^+$ ): 446.1289; found: 446.1287.

Selected data for **5d**: m.p. 170–171 °C;  $^1\text{H}$  NMR (500 MHz,  $\text{CD}_3\text{CN}$ ):  $\delta$  7.53 – 7.49 (m, 2 H), 7.34 – 7.30 (m, 2 H), 7.10 – 7.04 (m, 4 H), 6.00 (d,  $J = 13.0$  Hz, 1 H), 4.97 (dd,  $J = 4.0$  Hz, 4.5 Hz, 1 H), 4.38 (dd,  $J = 13.0$  Hz, 4.5 Hz, 1 H), 4.23 (s, 1 H), 3.58 (d,  $J = 4.0$  Hz, 1 H), 2.97–2.90 (m, 1 H), 2.70 – 2.59 (m, 2 H), 2.18 – 2.11 (m, 1 H) 1.03 (s, 3 H);  $^{13}\text{C}$  NMR (125 MHz,  $\text{CD}_3\text{CN}$ ):  $\delta$  212.8 (C), 163.6 (d,  $J = 244.5$  Hz, C), 163.5 (d,  $J = 243.6$  Hz, C), 134.2 (d,  $J = 8.4$  Hz, 2 CH), 132.6 (d,  $J = 3.4$  Hz, C), 132.4 (d,  $J = 3.3$  Hz, C), 130.2 (d,  $J = 8.4$  Hz, 2 CH), 117.1 (d,  $J = 21.8$  Hz, 2 CH), 115.8 (d,  $J = 21.1$  Hz, 2 CH), 93.3 (CH), 87.6 (CH), 80.4 (C), 55.8 (C), 49.1 (CH), 43.2 (CH), 35.8 ( $\text{CH}_2$ ), 28.8 ( $\text{CH}_2$ ), 21.5 ( $\text{CH}_3$ ).

Preparation of adduct **3e** and **5e**.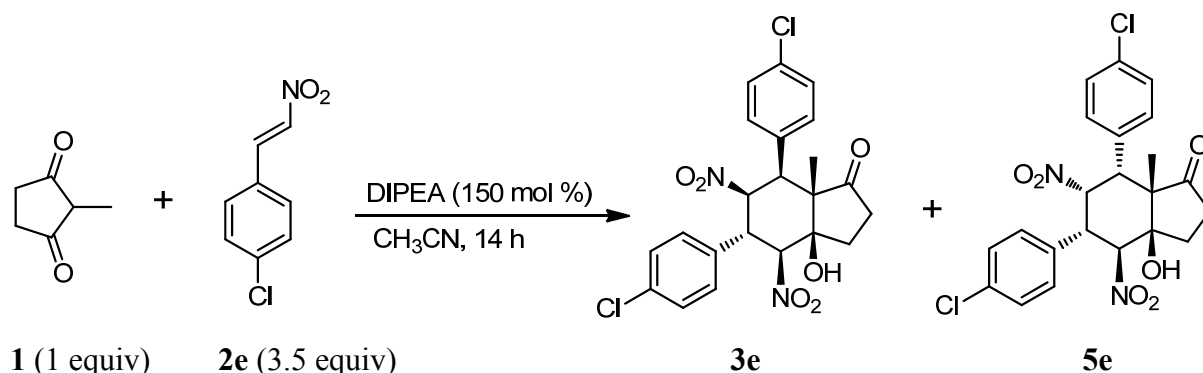

To a solution of 2-methyl-1,3-cyclopentanedione (**1a**, 25.0 mg, 0.223 mmol, 1.0 equiv) and diisopropylethylamine (43.3 mg, 0.335 mmol, 1.5 equiv) in CH<sub>3</sub>CN (1.1 mL) was added nitrostyrene (**2e**, 143.2 mg, 0.78 mmol, 3.5 equiv) and the resulting solution was stirred at room temperature for 14 h until the completion of the reaction, as monitored by TLC. Then the reaction mixture was directly filtered through a Celite bed (to remove insoluble polymer junk) and washed with EtOAc (15 mL). The filtrate was concentrated *in vacuo* and the crude product was purified by flash column chromatography with 20 % EtOAc-hexane to afford **3e** (60 mg, 56% yield) as white solid ( $R_f = 0.21$  developed two times in 20 % EtOAc-hexane) and **5e** (7.5 mg, 7% yield) as a pale yellow solid ( $R_f = 0.16$  in 20% EtOAc-hexane developed two times on TLC). Select data for **3e**: m.p. 231–232 °C; IR (neat): 3491, 2922, 2851, 1740, 1558, 1493, 1468, 1415, 1362, 1095, 836, 739 cm<sup>-1</sup>; <sup>1</sup>H NMR (500 MHz, CD<sub>3</sub>CN):  $\delta$  7.41 – 7.38 (m, 4H), 7.27 (d,  $J = 6.5$  Hz, 4H), 4.92 (dd,  $J = 12.5$  Hz, 6.5 Hz, 1H), 4.80 (d,  $J = 12.0$  Hz, 1H), 4.58 (s, 1H), 4.36 (dd,  $J = 12.5$  Hz, 12.0 Hz, 1H), 4.11 (d,  $J = 6.5$  Hz, 1H), 2.90 – 2.84 (m, 1H), 2.79 – 2.71 (m, 1H), 2.61 – 2.57 (m, 1H), 2.14 – 2.11 (m, 1H), 0.90 (s, 3H); <sup>13</sup>C NMR (125 MHz, CD<sub>3</sub>CN):  $\delta$  214.3 (C), 135.4 (C), 134.9 (C), 134.8 (C), 134.1 (C), 129.7 (4 CH), 129.6 (4 CH), 92.4 (CH), 89.0 (CH), 79.9 (C), 58.0 (C), 49.4 (CH), 40.9 (CH), 34.4 (CH<sub>2</sub>), 28.7 (CH<sub>2</sub>), 19.1 (CH<sub>3</sub>); exact mass calculated for C<sub>22</sub>H<sub>20</sub>Cl<sub>2</sub>N<sub>2</sub>O<sub>6</sub> (M<sup>+</sup>): 478.0698; found: 478.0696.

Selected data for **5e**: m.p. 137–138 °C; <sup>1</sup>H NMR (500 MHz, CD<sub>3</sub>CN):  $\delta$  7.49 (dd,  $J = 11.5$  Hz, 3.0 Hz, 2 H), 7.36 – 7.32 (m, 4 H), 7.30 – 7.27 (m, 2 H), 5.99 (d,  $J = 12.5$  Hz, 1 H), 4.97 (dd,  $J = 4.5$  Hz, 4.0 Hz, 1 H), 4.38 (dd,  $J = 13.0$  Hz, 4.5 Hz, 1 H), 4.32 (s, 1 H), 3.58 (d,  $J = 4.0$  Hz, 1 H), 3.00 – 2.90 (m, 1 H), 2.70 – 2.59 (m, 2 H), 2.11–2.07 (m, 1 H), 1.03 (s, 3 H); <sup>13</sup>C NMR (125 MHz, CD<sub>3</sub>CN):  $\delta$  212.7 (C), 135.3 (C), 135.2 (C), 135.1 (C), 134.7 (C), 133.9 (2 CH), 130.3 (2 CH), 129.8 (2 CH), 129.2 (2 CH), 92.9 (CH), 87.3 (CH), 80.4 (C), 55.8 (C), 49.2 (CH), 43.3 (CH), 35.8 (CH<sub>2</sub>), 28.7 (CH<sub>2</sub>), 21.5 (CH<sub>3</sub>).



Preparation of adduct **3f** and **5f**.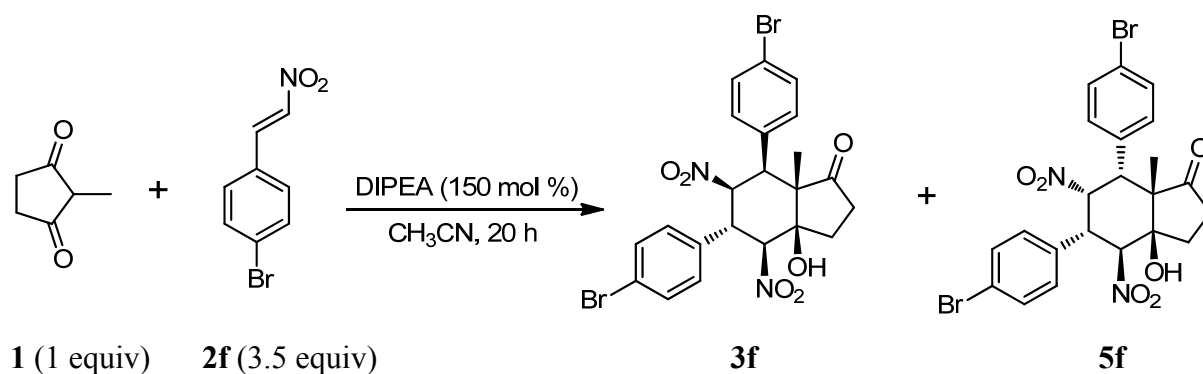

To a solution of DIPEA (44 mg, 0.34 mmol, 1.5 equiv), 2-methyl-1,3-cyclopentanedione (**1**, 25 mg, 0.22 mmol) in CH<sub>3</sub>CN (1.1 mL) was added nitrostyrene (**2f**, 178 mg, 0.78 mmol, 3.5 equiv) and the resulting solution was stirred at room temperature for 20 h until the completion of the reaction, as monitored by TLC. Then the reaction mixture was directly filtered through a Celite bed (to remove insoluble polymer junk) and washed with EtOAc (15 mL). The filtrate was concentrated *in vacuo* and the crude product was purified by flash column chromatography with 20 % EtOAc–hexane to afford **3f** (57.8 mg, 46% yield) as white solid ( $R_f = 0.20$  in 20% EtOAc–hexane, developed two times on TLC) and **5f** (12.7 mg, 10% yield) as a pale yellow solid ( $R_f = 0.15$  in 20% EtOAc–hexane developed two times on TLC). Select data for **3f**: m.p. 232–233 °C; IR (neat): 3600–3400, 2922, 2852, 1740, 1558, 1487, 1362, 1068, 1013, 828, 736 cm<sup>-1</sup>; <sup>1</sup>H NMR (500 MHz, CS<sub>2</sub>/CDCl<sub>3</sub>):  $\delta$  7.47 – 7.41 (m, 4 H), 7.39 (d,  $J = 8.5$  Hz, 2 H), 7.05 (d,  $J = 8.5$  Hz, 2 H), 4.82 (dd,  $J = 12.0, 6.5$  Hz, 1 H), 4.46 (d,  $J = 12.5$  Hz, 1 H), 4.35 (dd,  $J = 12.5, 12.5$  Hz, 1 H), 4.17 (d,  $J = 7.0$  Hz, 1 H), 3.46 (s, 1 H), 2.95 – 2.88 (m, 1 H), 2.64 – 2.53 (m, 1 H), 2.40 – 2.31 (m, 1 H), 2.23 – 2.15 (m, 1 H), 0.98 (s, 3 H); <sup>13</sup>C NMR (125 MHz, CS<sub>2</sub>/CDCl<sub>3</sub>):  $\delta$  211.8 (C), 132.5 (C), 132.3 (4 CH), 132.1 (C), 131.9 (4 CH), 123.3 (C), 123.1 (C), 91.9 (CH), 87.2 (CH), 78.1 (C), 56.8 (C), 47.5 (CH), 40.0 (CH), 33.7 (CH<sub>2</sub>), 28.5 (CH<sub>2</sub>), 18.1 (CH<sub>3</sub>); IR (neat): 3725, 3705, 3654, 3634, 2922, 2852, 1740, 1558, 1487, 1362, 1299, 1170, 1068, 1013, 828, 736 cm<sup>-1</sup>; <sup>1</sup>H NMR (500 MHz, CDCl<sub>3</sub>):  $\delta$  7.47 – 7.45 (m, 4 H), 7.39 (d,  $J = 8.5$  Hz, 2 H), 7.06 (d,  $J = 8.5$  Hz, 2 H), 4.82 (dd,  $J = 5.0, 7.0$  Hz, 1 H), 4.46 (d,  $J = 12.0$  Hz, 1 H), 4.35 (dd,  $J = 12.5, 12.5$  Hz, 1 H), 4.18 (d,  $J = 7.0$  Hz, 1 H), 3.50 (s, 1 H), 2.94 – 2.86 (m, 1 H), 2.63 – 2.55 (m, 1 H), 2.39 – 2.34 (m, 1 H), 2.22 – 2.16 (m, 1 H), 0.98 (s, 3 H); <sup>13</sup>C NMR (125 MHz, CDCl<sub>3</sub>):  $\delta$  212.1 (C), 132.7 (C), 132.4 (C), 132.2 (4 CH), 132.0 (4 CH), 123.2 (C), 123.1 (C), 92.0 (CH), 87.3 (CH), 78.2 (C), 56.9 (C), 47.6 (CH), 40.1 (CH), 33.8 (CH<sub>2</sub>), 28.5 (CH<sub>2</sub>), 18.2 (CH<sub>3</sub>); MS ( $m/z$ , relative intensity): 570 ( $M^+ + 4$ , 20), 568 ( $M^+ + 2$ , 40), 566 ( $M^+$ , 20), 476 (51), 415 (39), 403 (28), 349 (34), 284 (32), 202 (57), 169 (72), 102 (100); exact mass calculated for C<sub>22</sub>H<sub>20</sub>Br<sub>2</sub>N<sub>2</sub>O<sub>6</sub> ( $M^+$ ): 565.9688; found: 565.9688.

Select data for **5f**: m.p. 151–152 °C;  $^1\text{H}$  NMR (500 MHz,  $\text{CDCl}_3$ ):  $\delta$  7.44 (d,  $J = 8.0$  Hz, 4 H), 7.29 (d,  $J = 8.0$  Hz, 2 H), 7.04 (d,  $J = 8.0$  Hz, 2 H), 6.10 (d,  $J = 13.0$  Hz, 1 H), 4.83 (dd,  $J = 4.5$  Hz, 4.0 Hz, 1 H), 4.15 (dd,  $J = 12.5$  Hz, 4.5 Hz, 1 H), 3.39 (d,  $J = 4.0$  Hz, 1 H), 3.30 (s, 1 H), 2.90 – 2.83 (m, 1 H), 2.72 – 2.66 (m, 1 H), 2.41 – 2.35 (m, 1 H), 2.20 – 2.15 (m, 1 H), 1.11 (s, 3 H);  $^{13}\text{C}$  NMR (125 MHz,  $\text{CDCl}_3$ ):  $\delta$  209.3 (C), 132.8 (2 CH), 132.7 (C), 132.5 (2 CH), 131.8 (2 CH), 128.8 (2 CH), 123.7 (C), 123.0 (C), 91.3 (CH), 86.5 (CH), 78.8 (C), 54.4 (C), 49.3 (CH), 43.7 (CH), 35.0 ( $\text{CH}_2$ ), 30.9 (C), 28.8 ( $\text{CH}_2$ ), 20.7 ( $\text{CH}_3$ ).

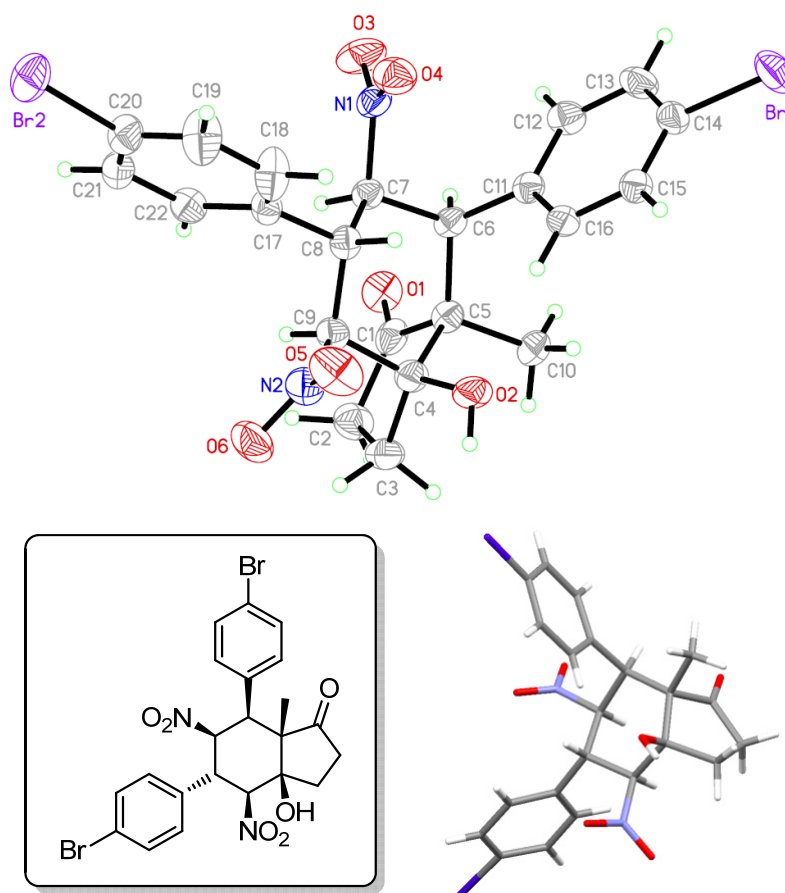

**Figure S3.** ORTEP and Stereo plots for X-ray crystal structures of ( $\pm$ )-**3f**.

CCDC 1474865 contains the supplementary crystallographic data for ( $\pm$ )-**3f**. These data can be obtained free of charge from the Cambridge Crystallographic Data Centre via [www.ccdc.cam.ac.uk/data\\_request/cif](http://www.ccdc.cam.ac.uk/data_request/cif).

**Table S3.** Crystal data and structure refinement for ( $\pm$ )-**3f**.

|                                   |                                             |                   |
|-----------------------------------|---------------------------------------------|-------------------|
| Identification code               | ic17312                                     |                   |
| Empirical formula                 | $C_{25}H_{26}Br_2N_2O_7$                    |                   |
| Formula weight                    | 626.30                                      |                   |
| Temperature                       | 150(2) K                                    |                   |
| Wavelength                        | 0.71073 Å                                   |                   |
| Crystal system                    | Triclinic                                   |                   |
| Space group                       | P-1                                         |                   |
| Unit cell dimensions              | a = 10.4202(7) Å                            | a = 61.4060(13)°. |
|                                   | b = 12.1455(8) Å                            | b = 71.1351(14)°. |
|                                   | c = 12.5464(8) Å                            | g = 78.7175(14)°. |
| Volume                            | 1317.70(15) Å <sup>3</sup>                  |                   |
| Z                                 | 2                                           |                   |
| Density (calculated)              | 1.578 Mg/m <sup>3</sup>                     |                   |
| Absorption coefficient            | 3.122 mm <sup>-1</sup>                      |                   |
| F(000)                            | 632                                         |                   |
| Crystal size                      | 0.250 x 0.200 x 0.120 mm <sup>3</sup>       |                   |
| Theta range for data collection   | 1.912 to 27.498°.                           |                   |
| Index ranges                      | -13 ≤ h ≤ 13, -15 ≤ k ≤ 15, -16 ≤ l ≤ 16    |                   |
| Reflections collected             | 17236                                       |                   |
| Independent reflections           | 6063 [R(int) = 0.0345]                      |                   |
| Completeness to theta = 25.242°   | 100.0 %                                     |                   |
| Absorption correction             | Semi-empirical from equivalents             |                   |
| Max. and min. transmission        | 0.706 and 0.509                             |                   |
| Refinement method                 | Full-matrix least-squares on F <sup>2</sup> |                   |
| Data / restraints / parameters    | 6063 / 114 / 340                            |                   |
| Goodness-of-fit on F <sup>2</sup> | 1.035                                       |                   |
| Final R indices [I > 2σ(I)]       | R1 = 0.0430, wR2 = 0.0929                   |                   |
| R indices (all data)              | R1 = 0.0579, wR2 = 0.0998                   |                   |
| Extinction coefficient            | n/a                                         |                   |
| Largest diff. peak and hole       | 0.760 and -0.440 e.Å <sup>-3</sup>          |                   |

### Preparation of Compound **3g** and **5g**:

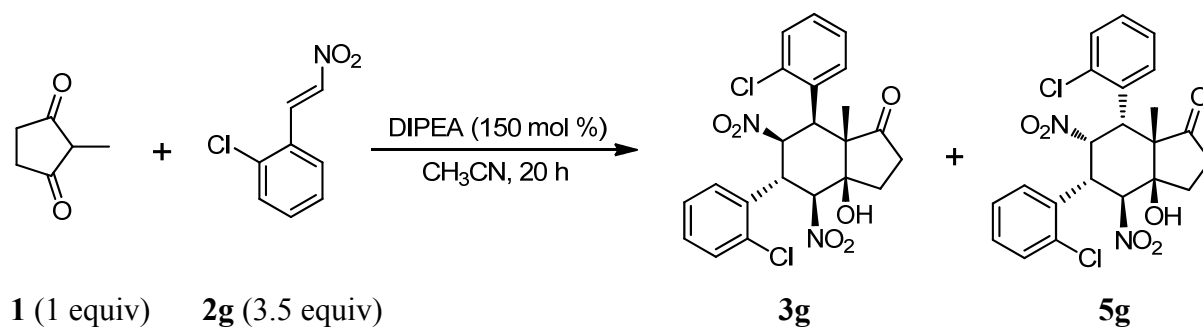

To a solution of 2-methyl-1,3-cyclopentanedione (**1**, 25.0 mg, 0.223 mmol, 1.0 equiv) and diisopropylethylamine (43.3 mg, 0.335 mmol, 1.5 equiv) in CH<sub>3</sub>CN (1.1 mL) was added nitrostyrene (**2g**, 143.2 mg, 0.78 mmol, 3.5 equiv) and the resulting solution was stirred at room temperature for 20 h until the completion of the reaction, as monitored by TLC. The solution was diluted with EtOAc (10 mL), washed with water (5 mL) and brine (5 mL), dried over MgSO<sub>4</sub> and concentrated in *vacuo* to give the crude residue. The crude product was purified by flash column chromatography with 25 % EtOAc–hexane ( $R_f$  = 0.21 for **3g** in 20 % EtOAc–hexane developed two times on TLC) to afford **3g** (86.6 mg, 81% yield) as white solid ( $R_f$  = 0.21 for **3g** in 20 % EtOAc–hexane developed two times on TLC) and **5g** (11.8 mg, 11% yield) as white solid ( $R_f$  = 0.26 in 20% EtOAc–hexane developed two times on TLC); Select data for **3g**: m.p. 212–213 °C; IR (neat): 3550–3250, 3069, 3015, 2988, 2961, 1733, 1559, 1477, 1445, 1365, 1321, 1173, 1112, 1089, 1037, 980, 908, 811, 759 cm<sup>-1</sup>; <sup>1</sup>H NMR (500 MHz, acetone-d<sub>6</sub>): δ 8.67 (d,  $J$  = 8.0 Hz, 1 H), 7.89 – 7.86 (m, 1 H), 7.48 (dd,  $J$  = 8.0, 7.0 Hz, 1 H), 7.43 (d,  $J$  = 7.0 Hz, 1 H), 7.37 – 7.33 (m, 2 H), 7.26 – 7.22 (m, 2 H), 5.92 (s, 1 H), 5.42 (dd,  $J$  = 12.0, 12.0 Hz, 1 H), 5.33 (d,  $J$  = 6.5 Hz, 1 H), 5.28 (d,  $J$  = 12.0 Hz, 1 H), 5.19 (dd,  $J$  = 12.5 Hz, 6.5 Hz, 1 H), 2.92 – 2.86 (m, 2 H), 2.78 – 2.70 (m, 1 H), 2.32 (dd,  $J$  = 10.5 Hz, 3.0 Hz, 1 H), 0.94 (s, 3 H); <sup>13</sup>C NMR (125 MHz, acetone-d<sub>6</sub>): δ 214.0 (C), 137.7 (C), 137.2 (C), 134.8 (C), 134.5 (CH), 133.2 (C), 131.1 (CH), 130.8 (CH), 130.5 (CH), 130.4 (CH), 128.3 (CH), 128.1 (CH), 128.0 (CH), 92.4 (CH), 88.8 (CH), 80.2 (C), 58.4 (C), 43.6 (CH), 37.0 (CH), 34.0 (CH<sub>2</sub>), 28.7 (CH<sub>2</sub>), 18.8 (CH<sub>3</sub>); MS ( $m/z$ , relative intensity): 480 (M<sup>+</sup>+2, 13), 478 (M<sup>+</sup>, 20), 443 (36), 367 (48), 325 (100), 202 (30), 165 (27), 139 (36), 125 (82); exact mass calculated for C<sub>22</sub>H<sub>20</sub>Cl<sub>2</sub>N<sub>2</sub>O<sub>6</sub> (M<sup>+</sup>): 478.0698; found: 478.0703.

Select data for **5g**: m.p. 99–100°C; <sup>1</sup>H NMR (500 MHz, acetone-d<sub>6</sub>): δ 8.38 (dd,  $J$  = 8.0

Hz, 1.5 Hz, 1 H), 7.56 (d,  $J = 8.0$  Hz, 1 H), 7.50 – 7.40 (m, 3 H), 7.35 – 7.28 (m, 3 H), 6.30 (d,  $J = 12.0$  Hz, 1 H), 5.91 (s, 1 H), 5.02 – 4.98 (m, 2 H), 4.91 (d,  $J = 2.5$  Hz, 1 H), 3.12 – 3.08 (m, 1 H), 2.98 – 2.93 (m, 1 H), 2.84 – 2.79 (m, 1 H), 2.51 – 2.48 (m, 1 H), 1.07 (s, 3 H);  $^{13}\text{C}$  NMR (125 MHz, acetone- $d_6$ ):  $\delta$  213.5 (C), 135.73 (C), 135.68 (C), 134.9 (C), 133.9 (C), 132.4 (CH), 131.2 (CH), 131.1 (CH), 130.9 (CH), 130.6 (CH), 128.8 (CH), 128.4 (CH), 127.6 (CH), 89.9 (CH), 87.5 (CH), 80.1 (C), 56.5 (C), 43.4 (CH), 37.1 (CH), 34.8 (CH $_2$ ), 31.0 (CH $_2$ ), 18.9 (CH $_3$ ).

### Preparation of adduct **3h** and **5h**.

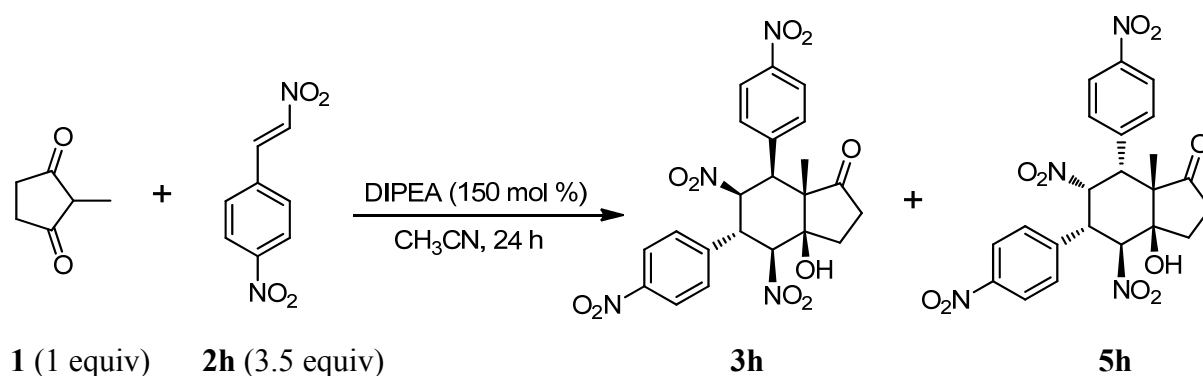

To a solution of DIPEA (44 mg, 0.34 mmol, 1.5 equiv), 2-methyl-1,3-cyclopentanedione (**1**, 25 mg, 0.22 mmol) in  $\text{CH}_3\text{CN}$  (1.1 mL) was added nitrostyrene (**2h**, 151.4 mg, 0.78 mmol, 3.5 equiv) and the resulting solution was stirred at room temperature for 24 h until the completion of the reaction, as monitored by TLC. Then the reaction mixture was directly filtered through a Celite bed (to remove insoluble polymer junk) and washed with EtOAc (15 mL). The filtrate was concentrated *in vacuo* and the crude product was purified by flash column chromatography with 30% EtOAc–hexane to afford **3h** (85.9 mg, 77% yield) as white solid ( $R_f = 0.22$  in 30% EtOAc–hexane developed two times on TLC) and **5h** (19.0 mg, 17% yield) as pale yellow solid ( $R_f = 0.17$  in 30% EtOAc–hexane developed two times on TLC). Select data for **3h**: m.p. 194 °C (decompose). IR (neat): 3550–3300, 3118, 3082, 2922, 2856, 1743, 1604, 1559, 1522, 1350, 1110, 1068, 858, 734  $\text{cm}^{-1}$ ;  $^1\text{H}$  NMR (500 MHz,  $\text{CD}_3\text{CN}$ ):  $\delta$

8.40 – 8.30 (m, 4 H), 8.27 (d,  $J = 8.5$  Hz, 2 H), 7.82 (d,  $J = 8.5$  Hz, 2 H), 5.22 (dd,  $J = 12.5$  Hz, 6.5 Hz, 1H), 5.08 (d,  $J = 12.0$  Hz, 1 H), 4.98 (d,  $J = 7.5$  Hz, 1 H), 4.73 (dd,  $J = 12.0, 12.5$  Hz, 1 H), 4.47 (d,  $J = 6.5$  Hz, 1 H), 3.07 (dd,  $J = 20.5$  Hz, 9.0 Hz, 1 H), 3.00 – 2.90 (m, 1 H), 2.83 – 2.78 (m, 1 H), 1.08 (s, 3 H);  $^{13}\text{C}$  NMR (125 MHz,  $\text{CD}_3\text{CN}$ ):  $\delta$  213.7 (C), 149.1 (C), 143.7 (C), 142.5 (C), 133.9 (C), 124.7 (4 CH), 124.5 (4 CH), 92.0 (CH), 88.6 (CH), 80.0 (C), 57.9 (C), 49.5 (CH), 41.4 (CH), 34.4 ( $\text{CH}_2$ ), 28.5 ( $\text{CH}_2$ ), 19.0 ( $\text{CH}_3$ ); MS ( $m/z$ , relative intensity): 500 ( $\text{M}^+$ , 1), 134 (59), 104 (87), 92 (81), 89 (55), 77 (100), 76 (71); exact mass calculated for  $\text{C}_{22}\text{H}_{20}\text{N}_4\text{O}_{10}$  ( $\text{M}^+$ ): 500.1179; found: 500.1182.

Selected data for **5h**: mp. 150–151 °C;  $^1\text{H}$  NMR (500 MHz,  $\text{CD}_3\text{CN}$ ):  $\delta$  8.17 (d,  $J = 8.5$  Hz, 2 H), 8.16 ( $J = 8.5$  Hz, 2 H), 7.78 (d,  $J = 8.5$  Hz, 2 H), 7.57 (d,  $J = 8.5$  Hz, 2 H), 6.09 (d,  $J = 12.5$  Hz, 1 H), 5.08 (dd,  $J = 4.5$  Hz, 4.0 Hz, 1 H), 4.59 (dd,  $J = 12.5$  Hz, 4.5 Hz, 1 H), 3.80 (d,  $J = 4.0$  Hz, 1 H), 3.02 – 2.95 (m, 1 H), 2.78 (dd,  $J = 13.5$  Hz, 9.0 Hz, 1 H), 2.67 (dd,  $J = 20.0$  Hz, 9.0 Hz, 1 H), 2.23 – 2.08 (m, 1 H), 1.06 (s, 3 H);  $^{13}\text{C}$  NMR (125 MHz,  $\text{CD}_3\text{CN}$ ):  $\delta$  212.7 (C), 149.2 (C), 148.9 (C), 143.5 (2 C), 133.5 (2 CH), 129.5 (2 CH), 125.3 (2 CH), 124.1 (2 CH), 91.9 (CH), 87.1 (CH), 80.5 (C), 55.9 (C), 49.4 (CH), 43.7 (CH), 35.7 ( $\text{CH}_2$ ), 28.6 ( $\text{CH}_2$ ), 21.4 ( $\text{CH}_3$ ).

### Preparation of Compound **3i** and **5i**:

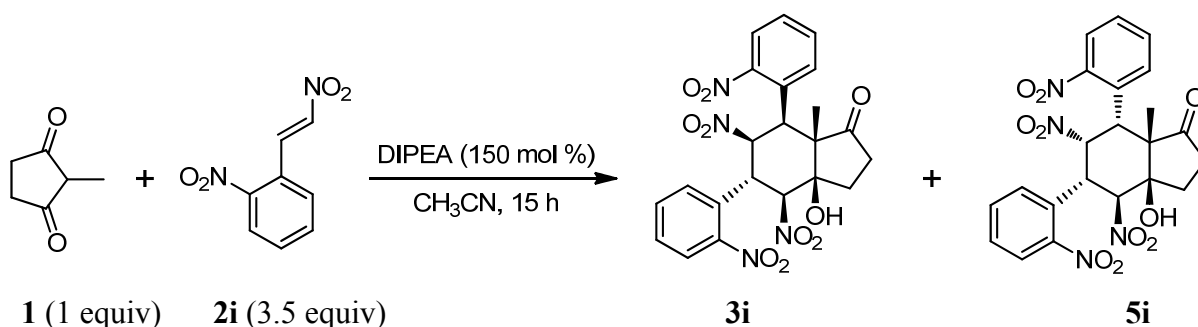

To a solution of DIPEA (44 mg, 0.34 mmol, 1.5 equiv), 2-methyl-1,3-cyclopentanedione (**1**, 25 mg, 0.22 mmol) in  $\text{CH}_3\text{CN}$  (1.1 mL) was added nitrostyrene (**2i**, 151.4 mg, 0.78 mmol, 3.5 equiv) and the resulting solution was stirred at room temperature for 15 h until the completion of the reaction, as monitored by TLC. The solution was diluted with EtOAc (10

mL), washed with water (5 mL) and brine (5 mL), dried over MgSO<sub>4</sub> and concentrated in *vacuo* to give the crude residue. The crude product was purified by flash column chromatography with 20% to 30 % EtOAc–hexane ( $R_f = 0.14$  for **5i**,  $R_f = 0.07$  for **3i**, in 20% EtOAc–hexane developed twice on TLC) to afford **5i** as pale yellow solid (33 mg, 30% yield) and **3i** as pale yellow solid (42 mg, 38% yield).

Selected data for **3i**: m.p. 184 °C (decomposed). IR (neat): 3550–3200, 2924, 2854, 1743, 1561, 1529, 1449, 1351, 1073, 855, 787, 735 cm<sup>-1</sup>; <sup>1</sup>H NMR (500 MHz, CD<sub>3</sub>CN):  $\delta$  8.62 (d,  $J = 7.0$  Hz, 1 H), 7.90 (d,  $J = 8.5$  Hz, 1 H), 7.83 (dd,  $J = 8.0$  Hz, 8.0 Hz, 1 H), 7.74 – 7.70 (m, 2 H), 7.64 – 7.56 (m, 2 H), 7.47 (dd,  $J = 8.5$  Hz, 7.0 Hz, 1 H), 5.83 (dd,  $J = 12.0$ , 11.5 Hz, 1 H), 4.98 (dd,  $J = 11.5$ , 6.5 Hz, 1 H), 4.95 (d,  $J = 6.5$  Hz, 1 H), 4.92 (brs, 1 OH), 4.89 (d,  $J = 12.0$  Hz, 1 H), 2.91 – 2.88 (m, 1 H), 2.80 – 2.76 (m, 1 H), 2.64 – 2.60 (m, 1 H), 2.19 – 2.17 (m, 1 H), 1.00 (s, 3 H); <sup>13</sup>C NMR (125 MHz, CD<sub>3</sub>CN):  $\delta$  213.7 (C), 153.7 (C), 151.7 (C), 134.84 (CH), 134.77 (CH), 133.3 (CH), 130.9 (CH), 130.8 (CH), 130.7 (C), 128.4 (CH), 127.7 (C), 127.1 (CH), 125.5 (CH), 92.3 (CH), 88.6 (CH), 80.3 (C), 58.3 (C), 42.3 (CH), 34.3 (CH), 34.2 (CH<sub>2</sub>), 28.3 (CH<sub>2</sub>), 18.5 (CH<sub>3</sub>); <sup>1</sup>H NMR (500 MHz, acetone-d<sub>6</sub>):  $\delta$  8.81 (d,  $J = 8.0$  Hz, 1 H), 8.08 (d,  $J = 8.0$  Hz, 1 H), 7.98 (d,  $J = 7.0$  Hz, 1 H), 7.85 (dd,  $J = 8.0$ , 1.5 Hz, 1 H), 7.76 (dd,  $J = 8.0$  Hz, 1.5 Hz, 1 H), 7.67 – 7.62 (m, 2 H), 7.55 – 7.51 (m, 1 H), 6.15 (s, 1 H), 6.07 (dd,  $J = 12.0$  Hz, 12.0 Hz, 1 H), 5.36 (d,  $J = 12.0$  Hz, 1 H), 5.26 (dd,  $J = 12.5$ , 6.5 Hz, 1 H), 5.04 (d,  $J = 6.5$  Hz, 1 H), 2.96 – 2.92 (m, 1 H), 2.88 – 2.72 (m, 2 H), 2.40 – 2.32 (m, 1 H), 1.09 (s, 3H); <sup>13</sup>C NMR (125 MHz, acetone-d<sub>6</sub>):  $\delta$  213.2 (C), 153.9 (C), 151.7 (C), 134.9 (CH), 134.6 (CH), 132.9 (CH), 131.5 (C), 130.6 (CH), 130.4 (CH), 128.4 (CH), 128.0 (C), 126.9 (CH), 125.2 (CH), 92.5 (CH), 88.7 (CH), 80.3 (C), 58.2 (C), 42.3 (CH), 34.4 (CH), 33.9 (CH<sub>2</sub>), 28.5 (CH<sub>2</sub>), 18.5 (CH<sub>3</sub>); exact mass calculated for C<sub>22</sub>H<sub>20</sub>N<sub>4</sub>O<sub>10</sub> (M<sup>+</sup>): 500.1179; found: 500.1182.

Selected data for **5i**: m.p 186–187 °C. IR (neat): 3550–3250, 2951, 2923, 2852, 1745, 1556, 1525, 1459, 1348, 1296, 857, 789, 739 cm<sup>-1</sup>; <sup>1</sup>H NMR (500 MHz, CD<sub>3</sub>CN):  $\delta$  8.17 (d,  $J = 8.0$  Hz, 1 H), 7.99 (d,  $J = 8.0$  Hz, 1 H), 7.91 (d,  $J = 8.0$  Hz, 1 H), 7.79 (dd,  $J = 8.0$  Hz, 6.0 Hz, 1 H), 7.64 – 7.60 (m, 2 H), 7.56 – 7.52 (m, 1 H), 7.36 (d,  $J = 8.0$  Hz, 1 H), 6.04 (d,  $J = 12.5$  Hz, 1 H), 5.54 (dd,  $J = 6.0$  Hz, 5.5 Hz, 1 H), 4.99 (dd,  $J = 12.5$  Hz, 6.0 Hz, 1 H), 4.56 (d,  $J = 5.5$  Hz, 1 H), 2.95 – 2.90 (m, 1 H), 2.85 – 2.77 (m, 1 H), 2.75 – 2.68 (m, 1 H), 2.42 – 2.36 (m, 1 H), 1.03 (s, 3 H); <sup>13</sup>C NMR (125 MHz, CD<sub>3</sub>CN):  $\delta$  214.5 (C), 151.4 (C), 150.9 (C),

135.3 (CH), 134.2 (CH), 132.6 (CH), 131.1 (CH), 130.9 (CH), 130.7 (C), 130.6 (C), 127.9 (CH), 127.0 (CH), 126.1 (CH), 90.7 (CH), 88.8 (CH), 80.7 (C), 56.6 (C), 41.5 (CH), 36.4 (CH), 35.3 (CH<sub>2</sub>), 31.6 (CH<sub>2</sub>), 18.3 (CH<sub>3</sub>).

A sample of 15 mg of racemic **3i**, prepared as described above, was dissolved with CH<sub>2</sub>Cl<sub>2</sub> (15 mL) in a vial, followed by the slow addition of hexane (2 mL) down the inside of the vial and the two-layer solution was maintained throughout the addition process. The solution was capped and left to stand at room temperature for slow evaporation over 5 days to give some crystals (ca. 100 crystals) of the compound **3i**. A crystal was subjected for the single crystal X-ray analysis (crystal ID: ic17971, as shown in the **Figure S4** and **Table S4**). Surprisingly, a chiral space group: orthorhombic P2<sub>1</sub>2<sub>1</sub>2<sub>1</sub> was observed in the crystal! In order to understand the sign of its specific rotation and to probe the approximate frequency of occurrence of the SDE effect in the recrystallization process, another two crystals from the same batch were arbitrarily selected and subjected for single crystal X-ray analysis. Notably, each of them had the same chiral space group, orthorhombic P2<sub>1</sub>2<sub>1</sub>2<sub>1</sub>, with the same absolute configuration as the previous crystal. The two single crystal X-ray analyses are shown in the **Figure S5**, **Table S5** (for crystal ID: ic18028), **Figure S6**, and **Table S6** (for crystal ID: ic18028\_1). On the other hand, another batch of ca. 40 mg of racemic **3i** was subject to the same recrystallization process as described previously to give ca. 150 crystals. From them, 46 crystals were arbitrarily selected and individually subjected to the HPLC analysis with a chiral column (Chiralpack IC). Eluent: 25% THF–hexane, flow rate: 1.0 mL/min. The two enantiomers were separated at *R<sub>t</sub>* 5.6 min and *R<sub>t</sub>* 8.0 min. For the 46 crystals analyzed, 16 of them eluted with *R<sub>t</sub>* 5.6 min (>99% *ee*), 14 of them eluted with *R<sub>t</sub>* 8.0 min (>99% *ee*), 2 of them displayed >80% *ee*, 4 of them were almost a racemate, and 10 of them had low *ee*. The pure enantiomer was individually collected, checking with the aid of the HPLC analysis, and subjected to optical rotation analysis. For *R<sub>t</sub>* 5.6 min:  $[\alpha]_{\text{D}}^{29} +10.2$  (*c* 0.58, acetone); for *R<sub>t</sub>* 8.0 min:  $[\alpha]_{\text{D}}^{29} -9.1$  (*c* 0.36, acetone). Moreover, the above two crystals investigated by X-ray (CCDC 1488798 and CCDC 1488808) were individually subjected to HPLC analysis, comparing and co-injecting with the previous samples, with the conclusion that the chiral X-ray structures obtained herein are (–)-**3i**.



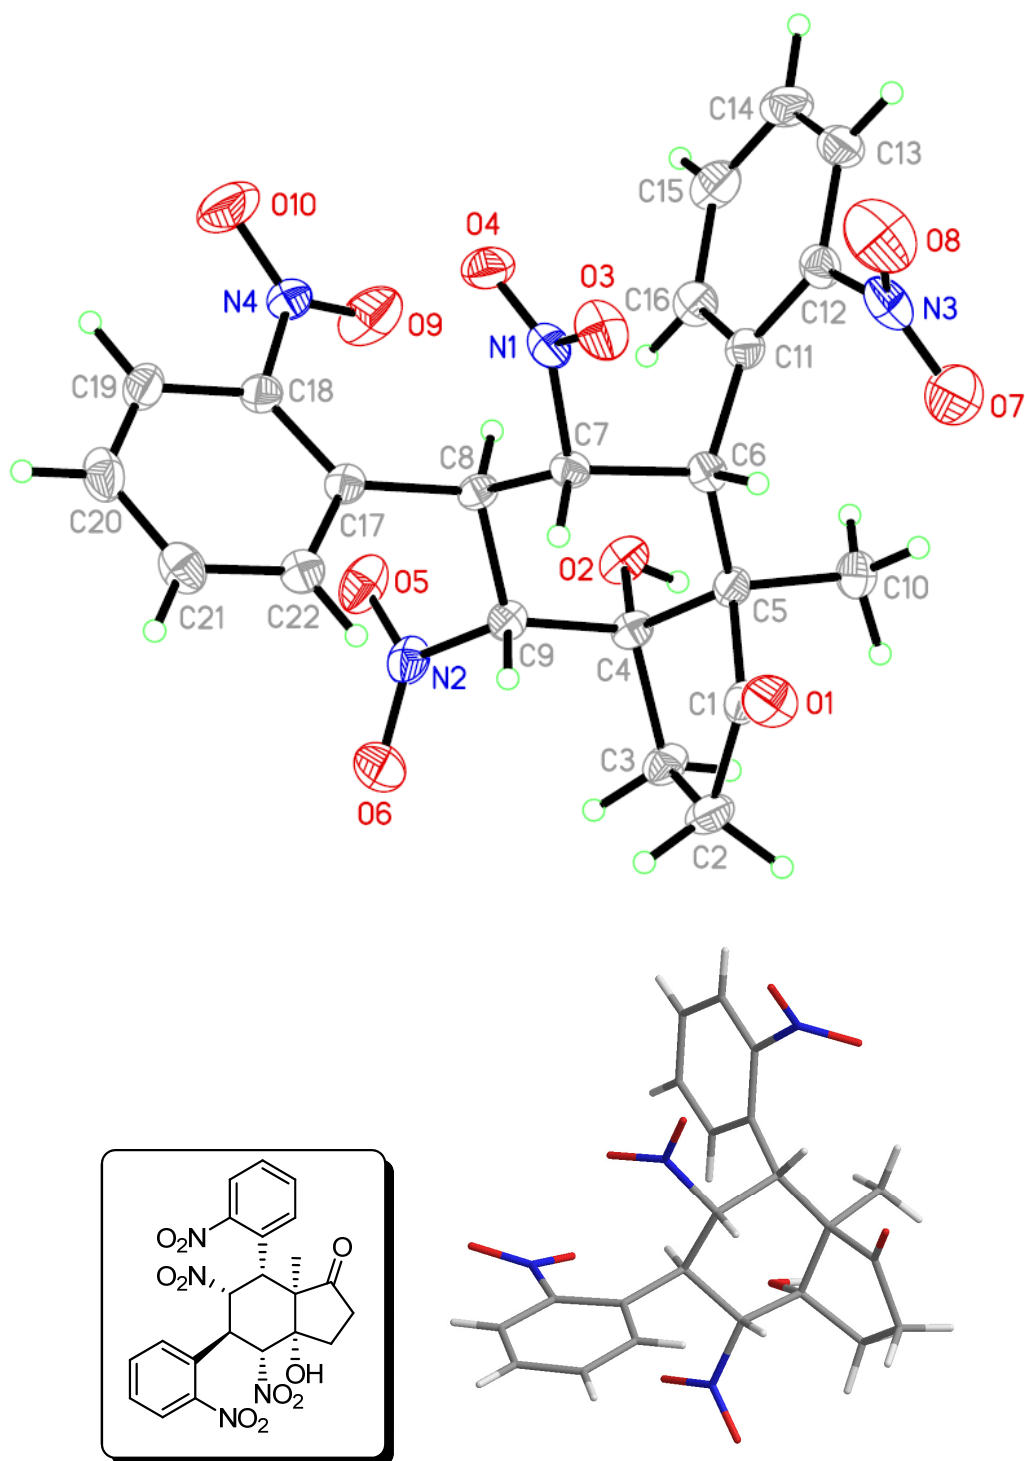

**Figure S4.** ORTEP, thermal ellipsoids drawn at the 50% probability level, and stereo plots for X-ray crystal structures of (-)-**3i**.

CCDC 1485986 contain the supplementary crystallographic data for this crystal. These data can be obtained free of charge from the Cambridge Crystallographic Data Centre via [www.ccdc.cam.ac.uk/data\\_request/cif](http://www.ccdc.cam.ac.uk/data_request/cif).

**Table S4.** Crystal data and structure refinement for (-)-**3i**, first crystal (CCDC 1485986).

|                                   |                                                                |                       |
|-----------------------------------|----------------------------------------------------------------|-----------------------|
| Identification code               | ic17971                                                        |                       |
| Empirical formula                 | C <sub>22</sub> H <sub>20</sub> N <sub>4</sub> O <sub>10</sub> |                       |
| Formula weight                    | 500.42                                                         |                       |
| Temperature                       | 200(2) K                                                       |                       |
| Wavelength                        | 1.54178 Å                                                      |                       |
| Crystal system                    | Orthorhombic                                                   |                       |
| Space group                       | P2 <sub>1</sub> 2 <sub>1</sub> 2 <sub>1</sub>                  |                       |
| Unit cell dimensions              | a = 9.3887(2) Å                                                | $\alpha = 90^\circ$ . |
|                                   | b = 11.6113(3) Å                                               | $\beta = 90^\circ$ .  |
|                                   | c = 19.7433(5) Å                                               | $\gamma = 90^\circ$ . |
| Volume                            | 2152.32(9) Å <sup>3</sup>                                      |                       |
| Z                                 | 4                                                              |                       |
| Density (calculated)              | 1.544 Mg/m <sup>3</sup>                                        |                       |
| Absorption coefficient            | 1.064 mm <sup>-1</sup>                                         |                       |
| F(000)                            | 1040                                                           |                       |
| Crystal size                      | 0.222 x 0.182 x 0.166 mm <sup>3</sup>                          |                       |
| Theta range for data collection   | 4.417 to 69.904°.                                              |                       |
| Index ranges                      | -11 ≤ h ≤ 11, -14 ≤ k ≤ 14, -18 ≤ l ≤ 23                       |                       |
| Reflections collected             | 10046                                                          |                       |
| Independent reflections           | 4021 [R(int) = 0.0168]                                         |                       |
| Completeness to theta = 67.679°   | 99.4 %                                                         |                       |
| Absorption correction             | Semi-empirical from equivalents                                |                       |
| Max. and min. transmission        | 0.7533 and 0.6531                                              |                       |
| Refinement method                 | Full-matrix least-squares on F <sup>2</sup>                    |                       |
| Data / restraints / parameters    | 4021 / 0 / 328                                                 |                       |
| Goodness-of-fit on F <sup>2</sup> | 1.047                                                          |                       |
| Final R indices [I > 2σ(I)]       | R1 = 0.0255, wR2 = 0.0698                                      |                       |
| R indices (all data)              | R1 = 0.0258, wR2 = 0.0701                                      |                       |
| Absolute structure parameter      | 0.06(3)                                                        |                       |
| Extinction coefficient            | 0.0039(3)                                                      |                       |
| Largest diff. peak and hole       | 0.227 and -0.158 e.Å <sup>-3</sup>                             |                       |

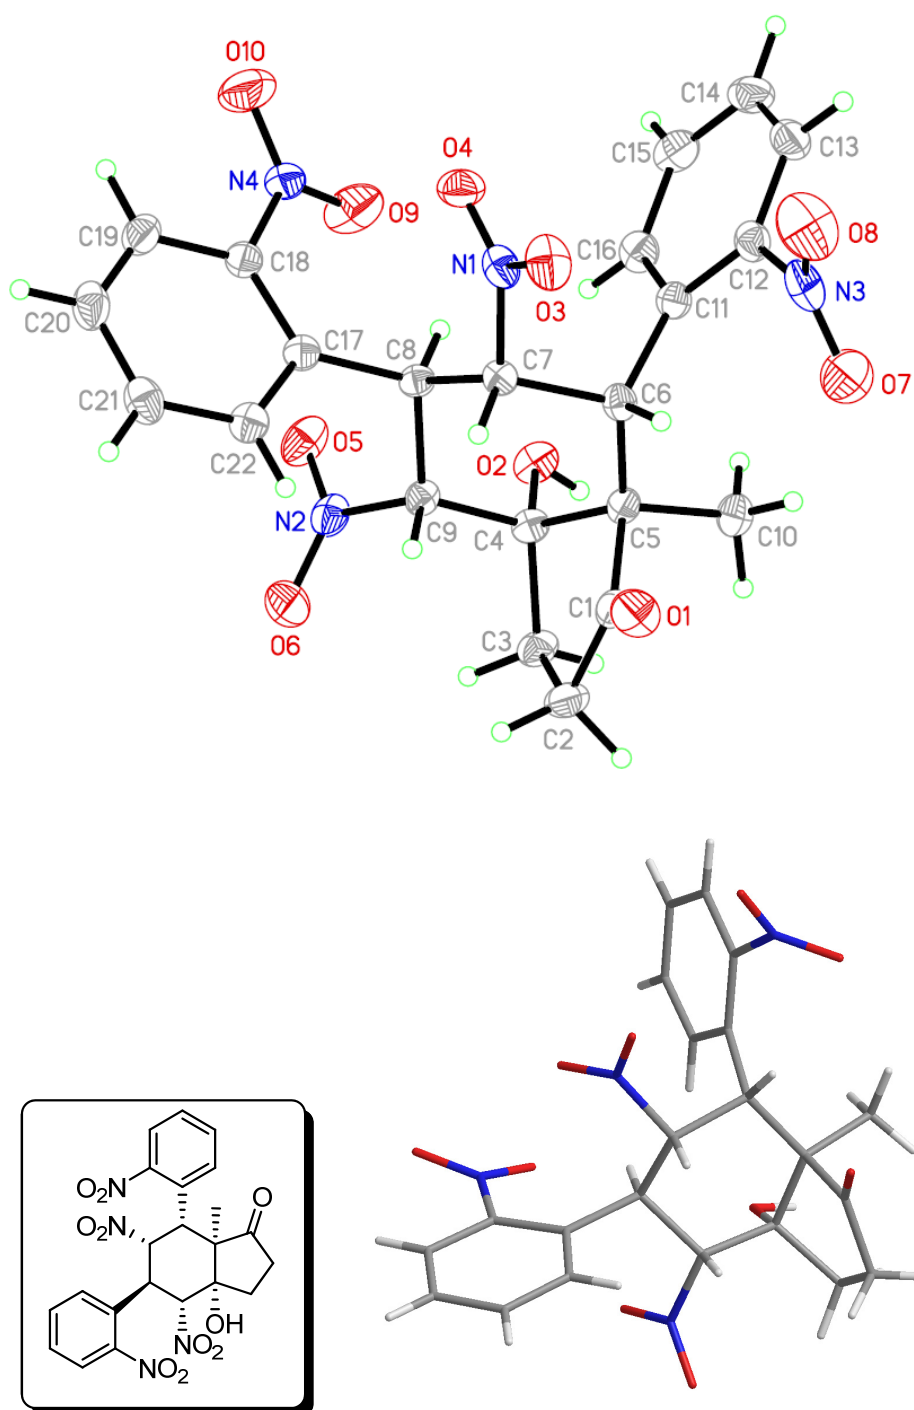

**Figure S5.** ORTEP, thermal ellipsoids drawn at the 50% probability level, and stereo plots for X-ray crystal structures of (-)-**3i**.

CCDC 1488798 contain the supplementary crystallographic data of this crystal data. These data can be obtained free of charge from the Cambridge Crystallographic Data Centre via [www.ccdc.cam.ac.uk/data\\_request/cif](http://www.ccdc.cam.ac.uk/data_request/cif).

**Table S5.** Crystal data and structure refinement for (–)-**3i**, second crystal (CCDC 1488798).

|                                   |                                                                |          |
|-----------------------------------|----------------------------------------------------------------|----------|
| Identification code               | ic18028                                                        |          |
| Empirical formula                 | C <sub>22</sub> H <sub>20</sub> N <sub>4</sub> O <sub>10</sub> |          |
| Formula weight                    | 500.42                                                         |          |
| Temperature                       | 200(2) K                                                       |          |
| Wavelength                        | 1.54178 Å                                                      |          |
| Crystal system                    | Orthorhombic                                                   |          |
| Space group                       | P2 <sub>1</sub> 2 <sub>1</sub> 2 <sub>1</sub>                  |          |
| Unit cell dimensions              | a = 9.3839(2) Å                                                | α = 90°. |
|                                   | b = 11.6090(2) Å                                               | β = 90°. |
|                                   | c = 19.7514(4) Å                                               | γ = 90°. |
| Volume                            | 2151.67(7) Å <sup>3</sup>                                      |          |
| Z                                 | 4                                                              |          |
| Density (calculated)              | 1.545 Mg/m <sup>3</sup>                                        |          |
| Absorption coefficient            | 1.064 mm <sup>-1</sup>                                         |          |
| F(000)                            | 1040                                                           |          |
| Crystal size                      | 0.333 x 0.298 x 0.157 mm <sup>3</sup>                          |          |
| Theta range for data collection   | 4.418 to 69.962°.                                              |          |
| Index ranges                      | -10 ≤ h ≤ 11, -14 ≤ k ≤ 12, -24 ≤ l ≤ 23                       |          |
| Reflections collected             | 12358                                                          |          |
| Independent reflections           | 4066 [R(int) = 0.0174]                                         |          |
| Completeness to theta = 67.679°   | 100.0 %                                                        |          |
| Absorption correction             | Semi-empirical from equivalents                                |          |
| Max. and min. transmission        | 0.7533 and 0.6145                                              |          |
| Refinement method                 | Full-matrix least-squares on F <sup>2</sup>                    |          |
| Data / restraints / parameters    | 4066 / 0 / 328                                                 |          |
| Goodness-of-fit on F <sup>2</sup> | 1.051                                                          |          |
| Final R indices [I > 2σ(I)]       | R1 = 0.0240, wR2 = 0.0617                                      |          |
| R indices (all data)              | R1 = 0.0245, wR2 = 0.0621                                      |          |
| Absolute structure parameter      | -0.01(3)                                                       |          |
| Extinction coefficient            | 0.0047(3)                                                      |          |
| Largest diff. peak and hole       | 0.224 and -0.128 e.Å <sup>-3</sup>                             |          |

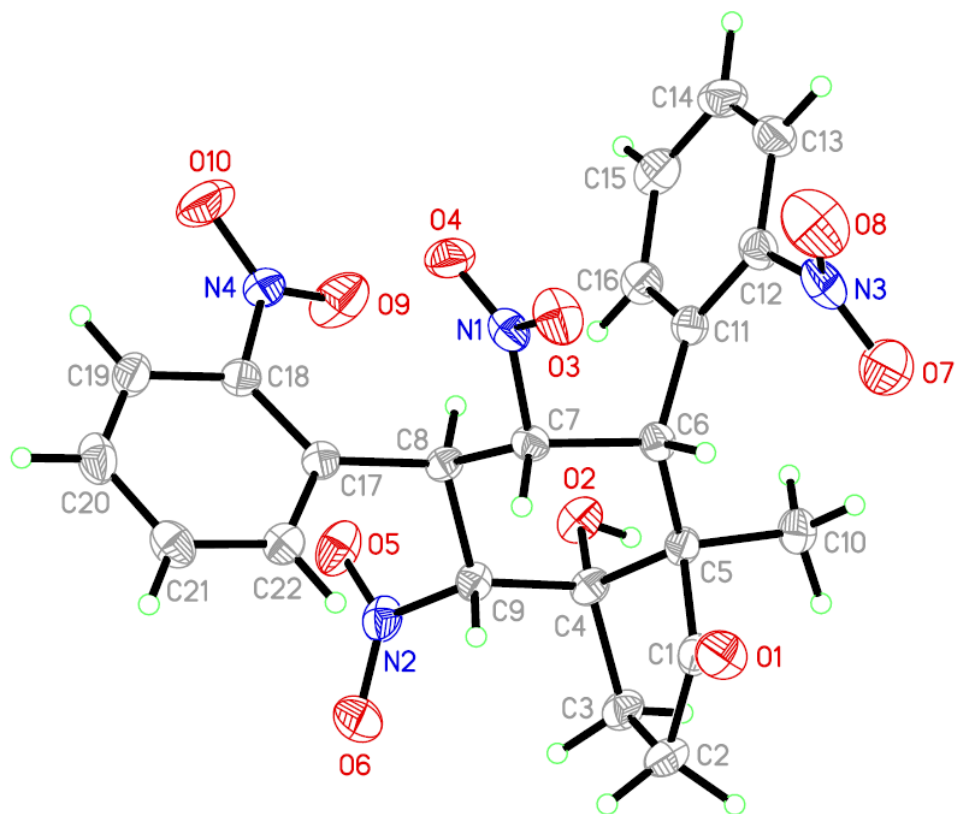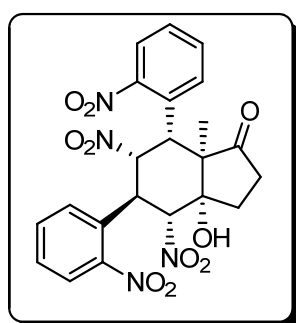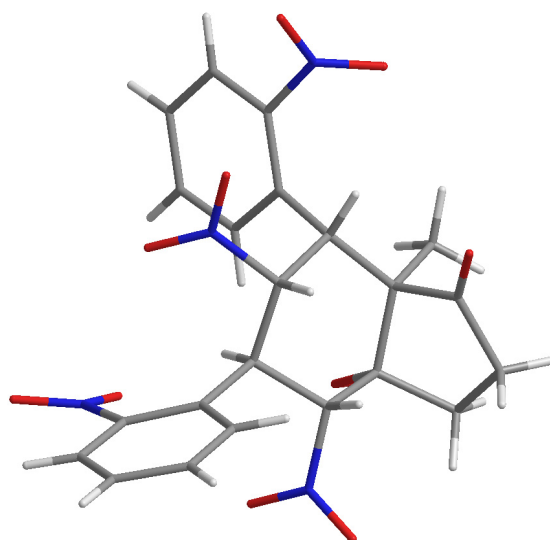

**Figure S6.** ORTEP, thermal ellipsoids drawn at the 50% probability level, and stereo plots for X-ray crystal structures of (-)-**3i**.

CCDC 1488808 contain the supplementary crystallographic data of this crystal. These data can be obtained free of charge from the Cambridge Crystallographic Data Centre via [www.ccdc.cam.ac.uk/data\\_request/cif](http://www.ccdc.cam.ac.uk/data_request/cif).

**Table S6.** Crystal data and structure refinement for (-)-**3i**, third crystal (CCDC 1488808).

|                                   |                                                                |          |
|-----------------------------------|----------------------------------------------------------------|----------|
| Identification code               | ic18028_1                                                      |          |
| Empirical formula                 | C <sub>22</sub> H <sub>20</sub> N <sub>4</sub> O <sub>10</sub> |          |
| Formula weight                    | 500.42                                                         |          |
| Temperature                       | 200(2) K                                                       |          |
| Wavelength                        | 1.54178 Å                                                      |          |
| Crystal system                    | Orthorhombic                                                   |          |
| Space group                       | P2 <sub>1</sub> 2 <sub>1</sub> 2 <sub>1</sub>                  |          |
| Unit cell dimensions              | a = 9.38810(10) Å                                              | α = 90°. |
|                                   | b = 11.6070(2) Å                                               | β = 90°. |
|                                   | c = 19.7468(3) Å                                               | γ = 90°. |
| Volume                            | 2151.76(5) Å <sup>3</sup>                                      |          |
| Z                                 | 4                                                              |          |
| Density (calculated)              | 1.545 Mg/m <sup>3</sup>                                        |          |
| Absorption coefficient            | 1.064 mm <sup>-1</sup>                                         |          |
| F(000)                            | 1040                                                           |          |
| Crystal size                      | 0.333 x 0.298 x 0.157 mm <sup>3</sup>                          |          |
| Theta range for data collection   | 4.418 to 69.931°.                                              |          |
| Index ranges                      | -11 ≤ h ≤ 10, -13 ≤ k ≤ 14, -24 ≤ l ≤ 23                       |          |
| Reflections collected             | 10354                                                          |          |
| Independent reflections           | 4066 [R(int) = 0.0181]                                         |          |
| Completeness to theta = 67.679°   | 99.9 %                                                         |          |
| Absorption correction             | Semi-empirical from equivalents                                |          |
| Max. and min. transmission        | 0.7533 and 0.5782                                              |          |
| Refinement method                 | Full-matrix least-squares on F <sup>2</sup>                    |          |
| Data / restraints / parameters    | 4066 / 0 / 328                                                 |          |
| Goodness-of-fit on F <sup>2</sup> | 1.031                                                          |          |
| Final R indices [I > 2σ(I)]       | R1 = 0.0247, wR2 = 0.0629                                      |          |
| R indices (all data)              | R1 = 0.0253, wR2 = 0.0634                                      |          |
| Absolute structure parameter      | -0.06(4)                                                       |          |
| Extinction coefficient            | 0.0034(3)                                                      |          |
| Largest diff. peak and hole       | 0.213 and -0.144 e.Å <sup>-3</sup>                             |          |

Fig S27. <sup>1</sup>H NMR (acetone-d<sub>6</sub>, 500 MHz) of compound 3a.

CJW-2-15-top

exp147 s2pu1

|             |             |            |          |
|-------------|-------------|------------|----------|
| SAMPLE      |             | DEC. & VT  |          |
| date        | Dec 18 2014 | dfrq       | 125.695  |
| solvent     | Acetone     | dn         | C13      |
| file        | exp         | dpwr       | 30       |
| ACQUISITION |             | dof        | 0        |
| sfrq        | 499.836     | dm         | nnn      |
| tn          | H1          | dmm        | c        |
| at          | 3.000       | dmf        | 200      |
| np          | 48000       | dseq       |          |
| sw          | 8000.0      | dres       | 1.0      |
| fb          | not used    | homo       | n        |
| bs          | 4           | PROCESSING |          |
| tpwr        | 62          | wtfile     |          |
| pw          | 4.8         | proc       | ft       |
| d1          | 1.000       | fn         | not used |
| tof         | 499.7       | math       | f        |
| nt          | 4           |            |          |
| ct          | 4           | werr       |          |
| alock       | y           | wexp       | wft      |
| gain        | not used    | wbs        |          |
|             | FLAGS       | wnt        | wft      |
| il          | n           |            |          |
| in          | n           |            |          |
| dp          | y           |            |          |
| hs          | nn          |            |          |
| DISPLAY     |             |            |          |
| sp          | -0.0        |            |          |
| wp          | 4998.3      |            |          |
| vs          | 156         |            |          |
| sc          | 0           |            |          |
| wc          | 210         |            |          |
| hzmm        | 23.80       |            |          |
| is          | 33.57       |            |          |
| rfl         | 2033.0      |            |          |
| rfp         | 1024.7      |            |          |
| th          | 2           |            |          |
| ins         | 100.000     |            |          |
| ai          | cdc         | ph         |          |

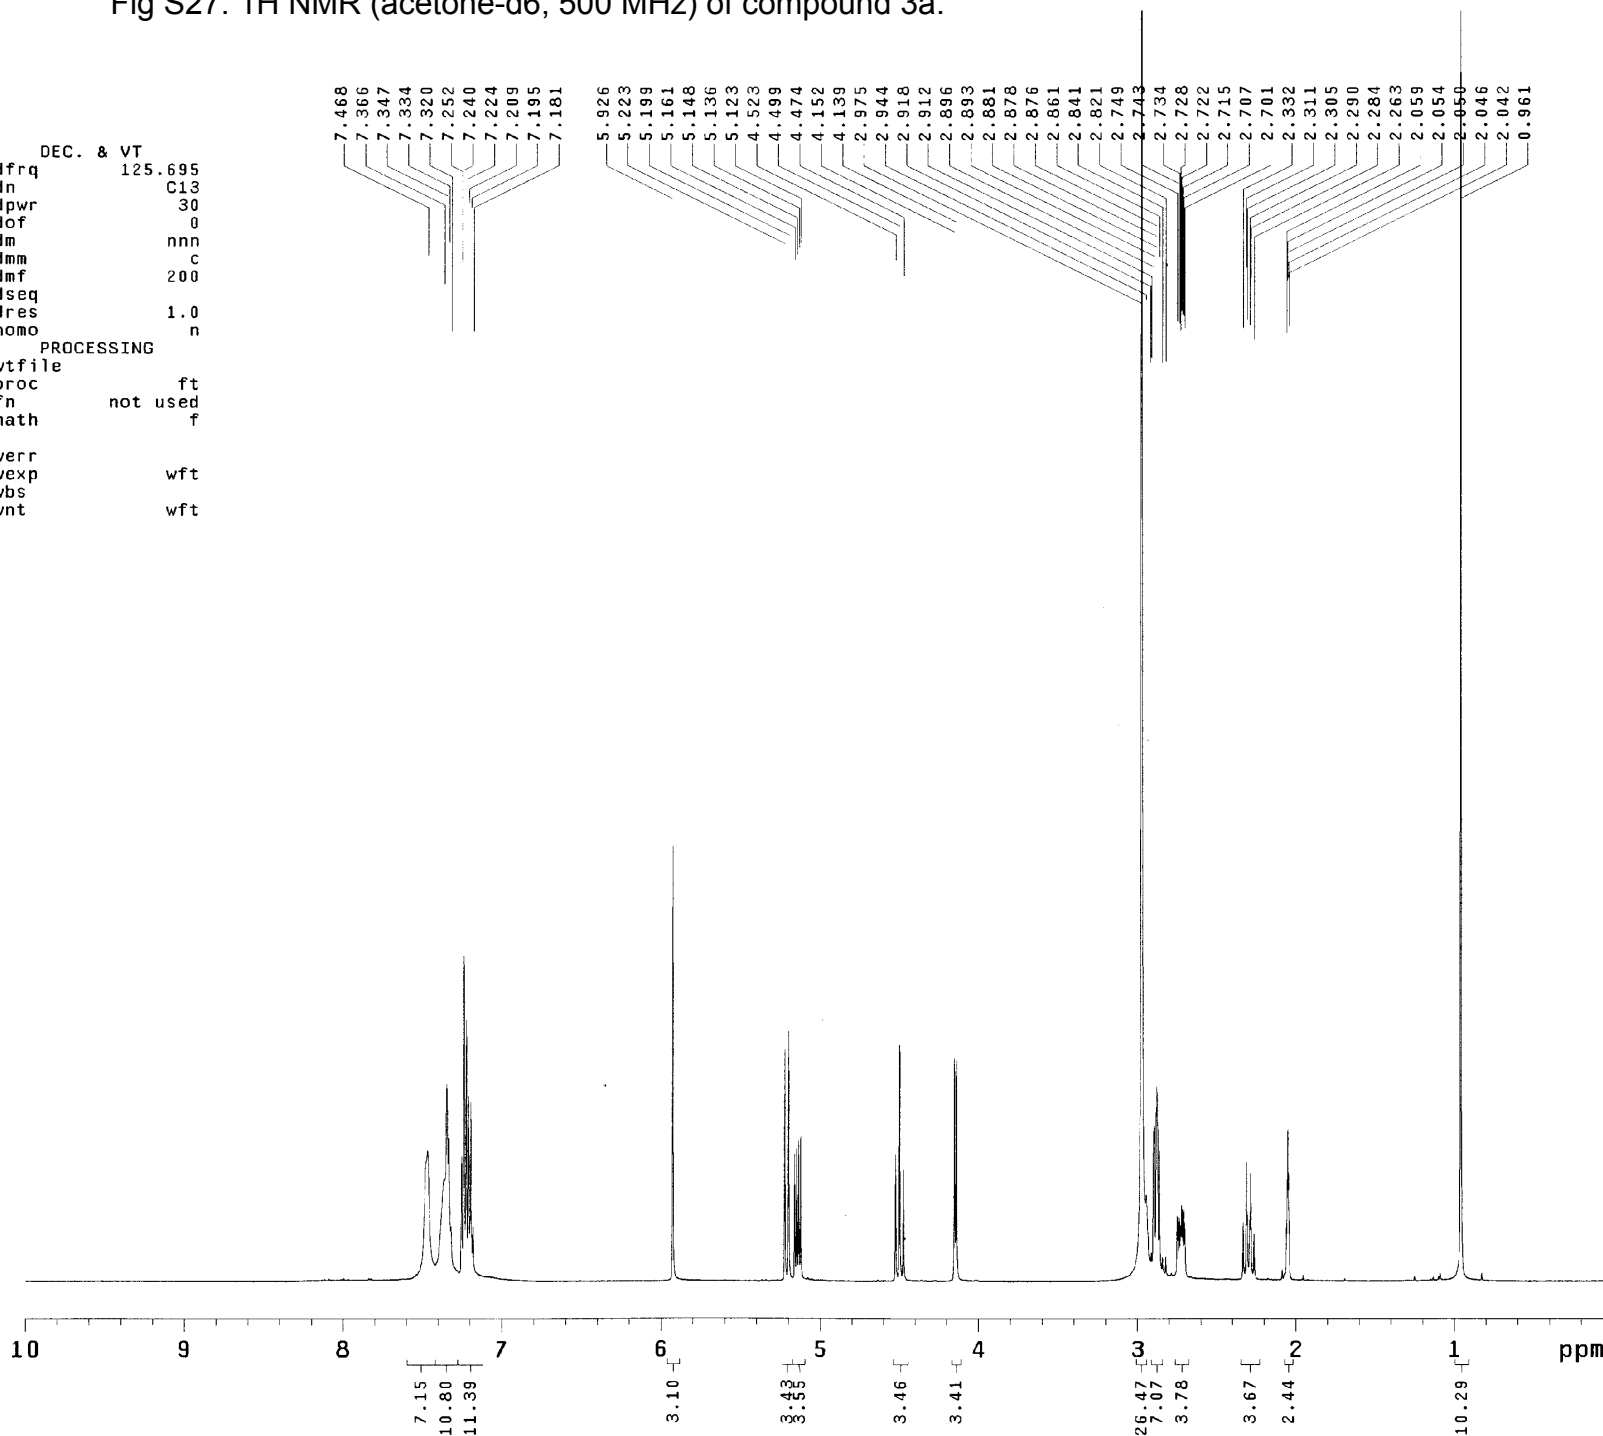

CJW-2-15-top

expi48 s2pul

```

SAMPLE
date Dec 19 2014 dfrq 499.835
solvent Acetone dn H1
file exp dpwr 44
ACQUISITION dof 0
sfrq 125.697 dm yyy
tn C13 dmm w
at 1.000 dmf 8868
np 60332 dseq
sw 30165.9 dres 1.0
fb not used homo n
bs 4 PROCESSING lb 1.00
tpwr 59 wtfile
pw 4.8 proc ft
d1 1.000 fn 131072
tof 1883.7 math f
nt 3000
ct 3000
alock y werr
gain not used wexp wft
FLAGS wbs wft
il n wnt
in n
dp y
hs nn
DISPLAY
sp -0.2
wp 27649.9
vs 295
sc 0
wc 210
hzmm 131.67
is 33.57
rfl 4931.1
rfp 3760.4
th 4
ins 100.000
nm cdc ph

```

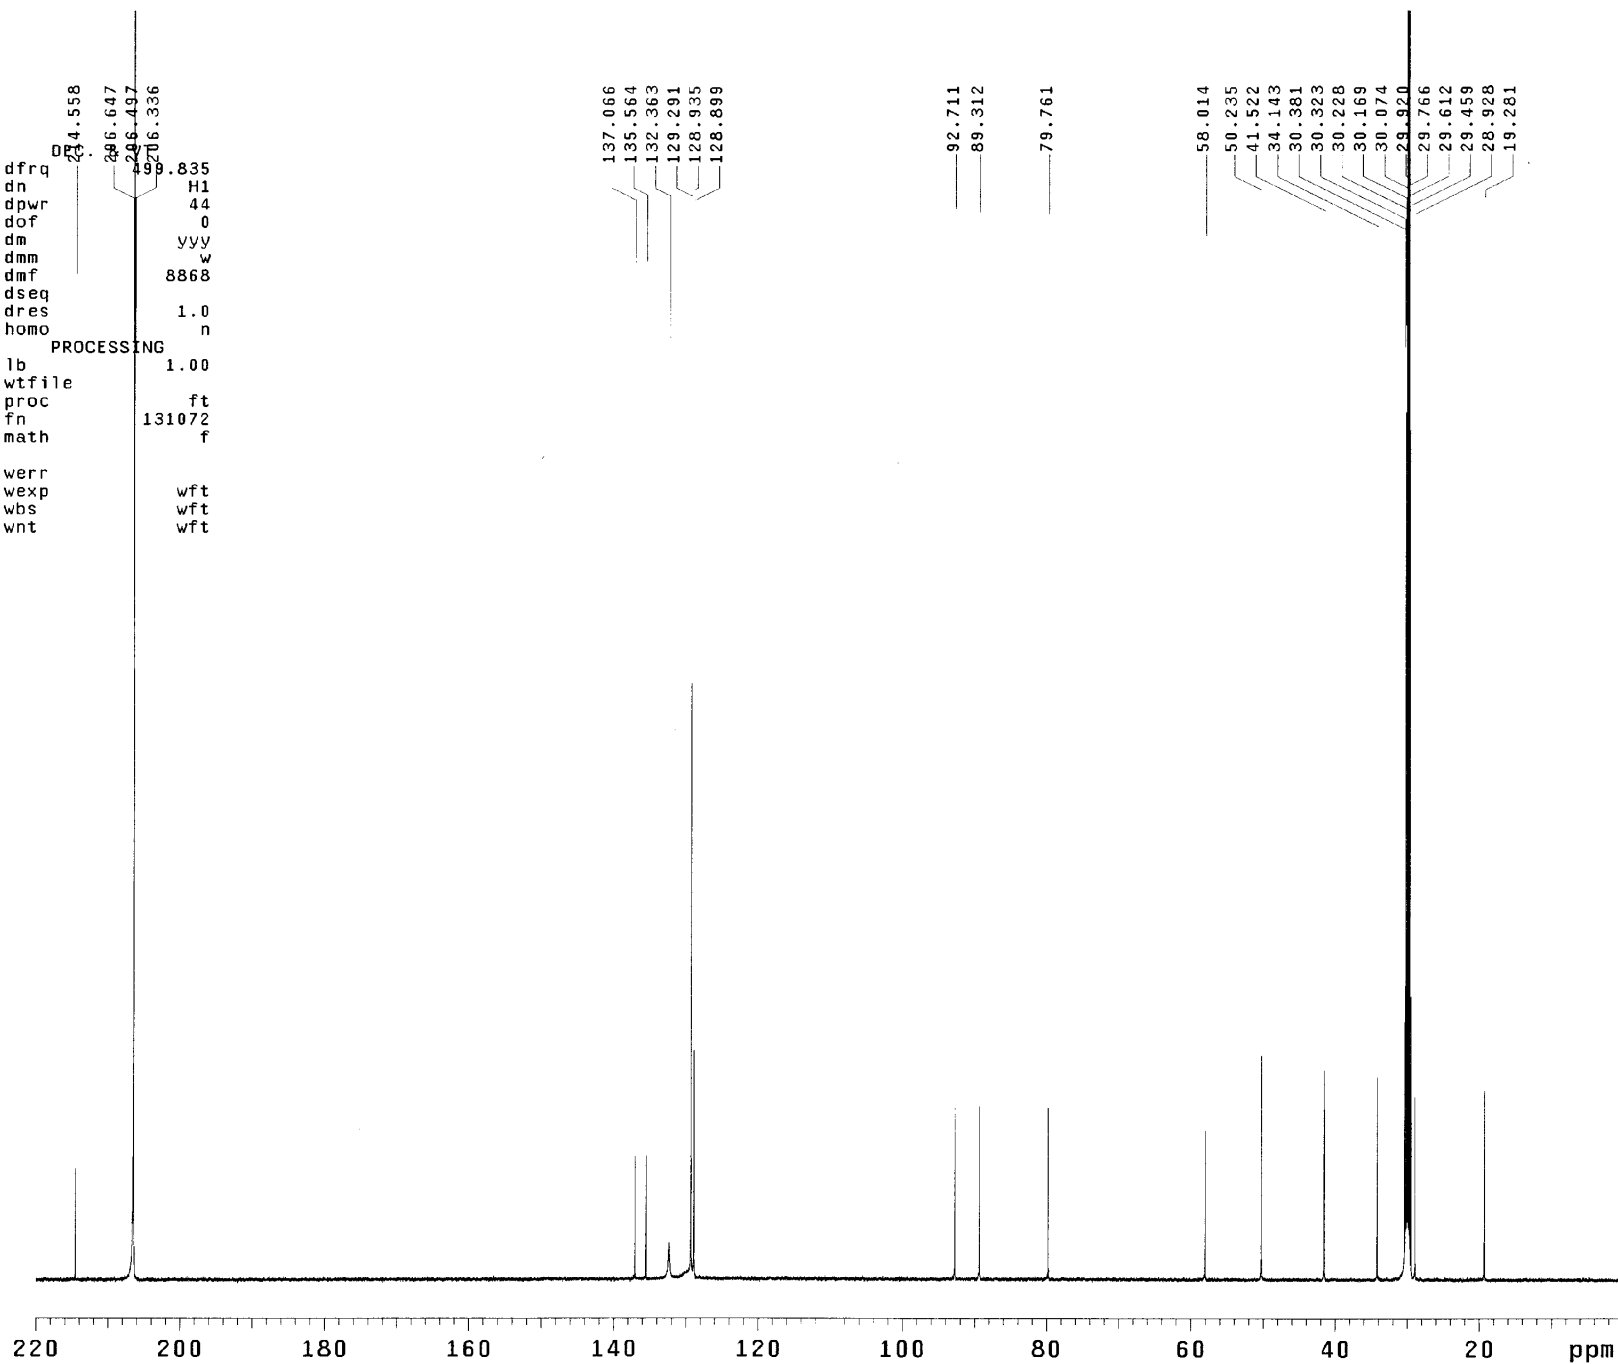Fig S28.  $^{13}\text{C}$  NMR (acetone- $d_6$ , 125 MHz) of compound 3a.



CJW-2-15-top

exp149 DEPT

| SAMPLE      |             | DEPT       | ACQUISITION ARRAYS |       |
|-------------|-------------|------------|--------------------|-------|
| date        | Dec 19 2014 | j1xh       | 140.0              | array |
| solvent     | Acetone     | mult       | arrayed            | mult  |
| sample      | undefined   | SPECIAL    | arraydim           | 4     |
| ACQUISITION |             | temp       | not used           | i     |
| sw          | 30165.9     | gain       | 28                 | mult  |
| at          | 1.000       | spin       | 0                  | 1     |
| np          | 60332       | PROCESSING |                    |       |
| bs          | 4           | lb         | 1.00               | 4     |
| ss          | -4          | fn         | 131072             | 1.5   |
| d1          | 1.000       | SPECTRUM   |                    |       |
| nt          | 1500        | wp         | 27649.9            |       |
| ct          | 1500        | sp         | -0.2               |       |
| TRANSMITTER |             | rp         | -169.4             |       |
| tn          | C13         | lp         | 242.8              |       |
| tof         | 1883.7      | ai         | cdc                | ph    |
| tpwr        | 59          | REFERENCE  |                    |       |
| pw          | 14.700      | rfl        | 1171.2             |       |
| DECOUPLER   |             | rfl        | 0                  |       |
| dn          | H1          | PLOT       |                    |       |
| dof         | 0           | wc         | 210                |       |
| dpwr        | 44          | sc         | 0                  |       |
| dm          | nny         | vs         | 150                |       |
| dmm         | ccw         | hzmm       | 131.67             |       |
| dmf         | 8868        | th         | 7                  |       |
| pp1v1       | 59          |            |                    |       |
| pp          | 21.200      |            |                    |       |

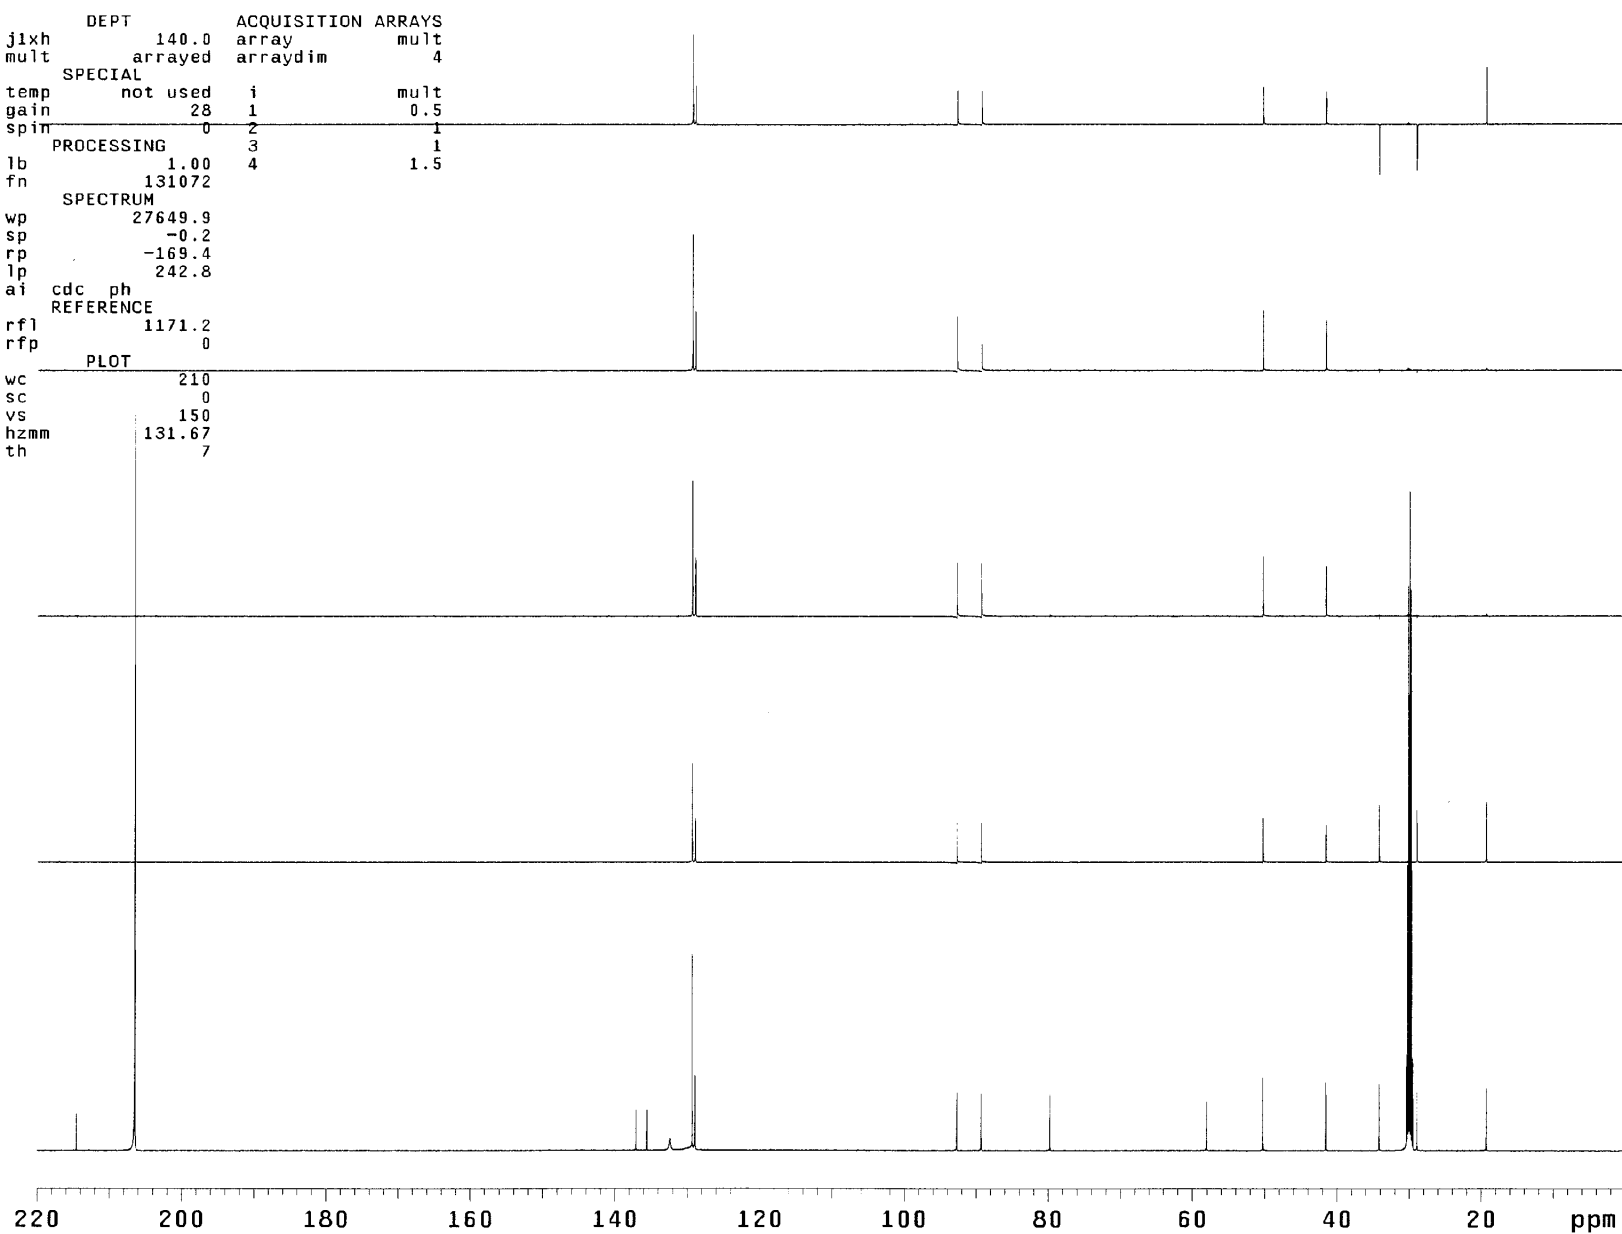

Fig S29. DEPT of compound 3a.

Fig S30. HSQC of compound 3a.

CJW-2-15-top  
exp152 gHSQC

| SAMPLE           | FLAGS          | ACQUISITION | ARRAYS |
|------------------|----------------|-------------|--------|
| date Dec 19 2014 | hs n           | array       | phase  |
| solvent Acetone  | sspul y        | arraydim    | 256    |
| sample undefined | PFGflg y       |             |        |
| ACQUISITION      | hsglv1 1004    | i           | phase  |
| sw 4743.8        | SPECIAL        | 1           | 1      |
| at 0.216         | temp not used  | 2           | 2      |
| np 2048          | gain 48        |             |        |
| fb not used      | spin 0         |             |        |
| ss 32            | GRADIENTS      |             |        |
| d1 1.000         | gzlv11 1004    |             |        |
| nt 8             | gt1 0.002000   |             |        |
| 2D ACQUISITION   | gzlv13 505     |             |        |
| sw1 21367.5      | gt3 0.001000   |             |        |
| ni 128           | gstab 0.000500 |             |        |
| phase arrayed    | F2 PROCESSING  |             |        |
| TRANSMITTER      | gf 0.100       |             |        |
| tn H1            | gfs not used   |             |        |
| sfrq 499.835     | fn 2048        |             |        |
| tof -375.0       | F1 PROCESSING  |             |        |
| tpwr 62          | gf1 0.006      |             |        |
| pw 13.800        | gfs1 not used  |             |        |
| DECOUPLER        | proc1 lp       |             |        |
| dn C13           | fn1 2048       |             |        |
| dof -2515.2      | DISPLAY        |             |        |
| dm nny           | sp 386.5       |             |        |
| dmm ccp          | wp 3437.4      |             |        |
| dmf 32258        | sp1 2029.2     |             |        |
| dpwr 43          | wp1 14648.4    |             |        |
| pwxlvl 61        | rfl 2501.6     |             |        |
| pw 11.000        | rfl 2248.7     |             |        |
| HSQC             | rfl1 6382.0    |             |        |
| j1xh 140.0       | rfl1 5218.6    |             |        |
| nullflg y        | PLOT           |             |        |
| mult 2           | wc 150.0       |             |        |
|                  | sc 6.2         |             |        |
|                  | wc2 116.2      |             |        |
|                  | sc2 0          |             |        |
|                  | vs 736         |             |        |
|                  | th 4           |             |        |
|                  | ai cdc ph      |             |        |

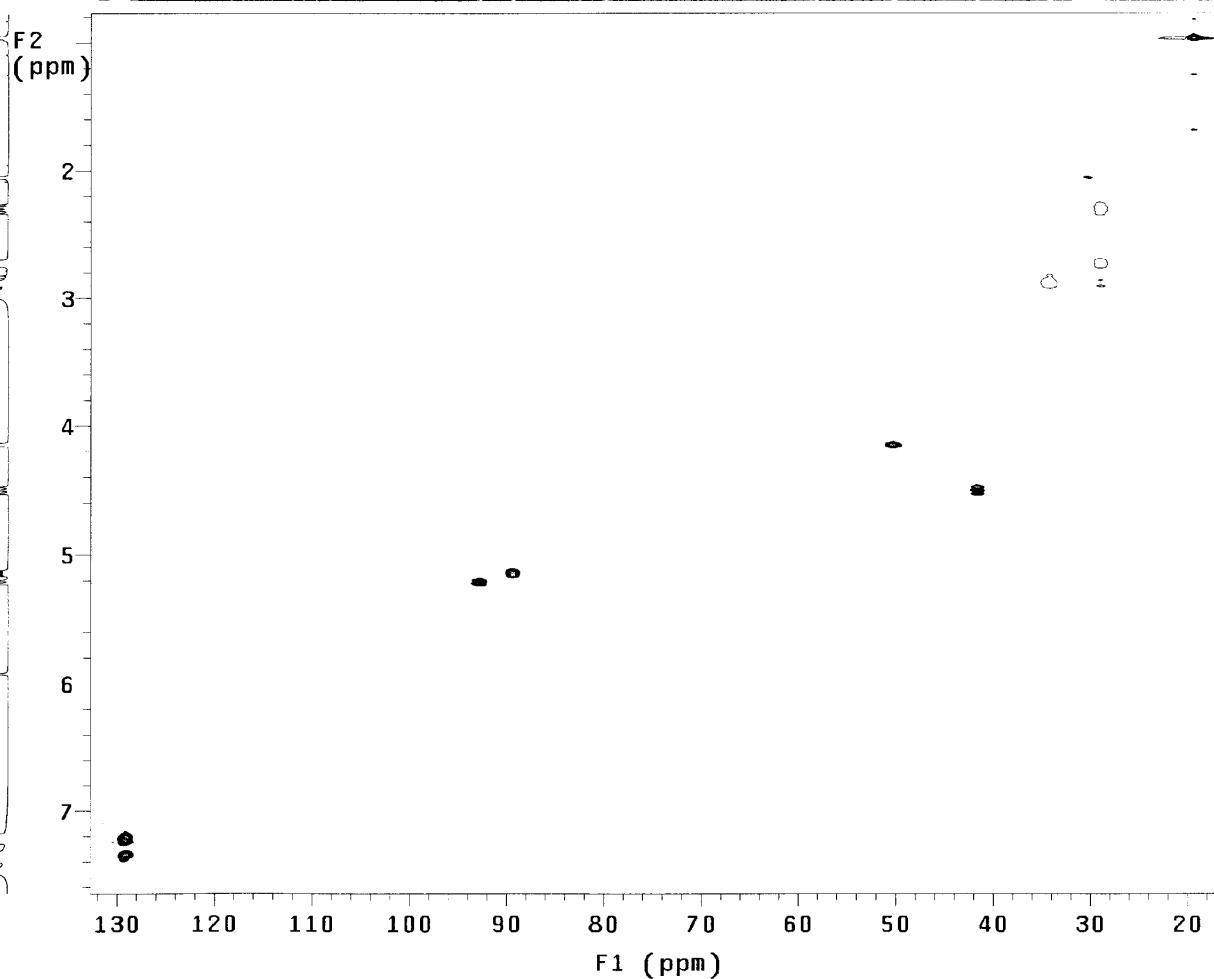

Fig S31. COSY of compound 3a.

CJW-2-15-top  
exp150 gCOSY

|                |             |               |          |
|----------------|-------------|---------------|----------|
| SAMPLE         |             | FLAGS         |          |
| date           | Dec 19 2014 | hs            | nn       |
| solvent        | Acetone     | sspul         | n        |
| sample         | undefined   | hsglvl        | 1004     |
| ACQUISITION    |             | SPECIAL       |          |
| sw             | 4743.8      | temp          | not used |
| at             | 0.216       | gain          | 28       |
| np             | 2048        | spin          | 0        |
| fb             | not used    | F2 PROCESSING |          |
| ss             | 16          | sb            | -0.108   |
| d1             | 1.000       | sbs           | not used |
| nt             | 8           | fn            | 2048     |
| 2D ACQUISITION |             | F1 PROCESSING |          |
| sw1            | 4743.8      | sb1           | -0.027   |
| n1             | 128         | sbs1          | not used |
| TRANSMITTER    |             | PROC1         |          |
| tn             | H1          | fn1           | 2048     |
| sfrq           | 499.835     | DISPLAY       |          |
| tof            | -375.0      | sp            | 344.7    |
| tpwr           | 62          | wp            | 3775.6   |
| pw             | 13.800      | sp1           | 348.1    |
| GRADIENTS      |             | wp1           | 3775.6   |
| gzlv11         | 1004        | rfl           | 3214.9   |
| gt1            | 0.001000    | rfp           | 2962.0   |
| gstab          | 0.000500    | rfl1          | 3216.2   |
| DECOUPLER      |             | rfp1          | 2962.0   |
| dn             | C13         | PLOT          |          |
| dm             | nnn         | wc            | 155.0    |
|                |             | sc            | 10.0     |
|                |             | wc2           | 155.0    |
|                |             | sc2           | 0        |
|                |             | vs            | 736      |
|                |             | th            | 4        |
|                | ai          | cdc           | av       |

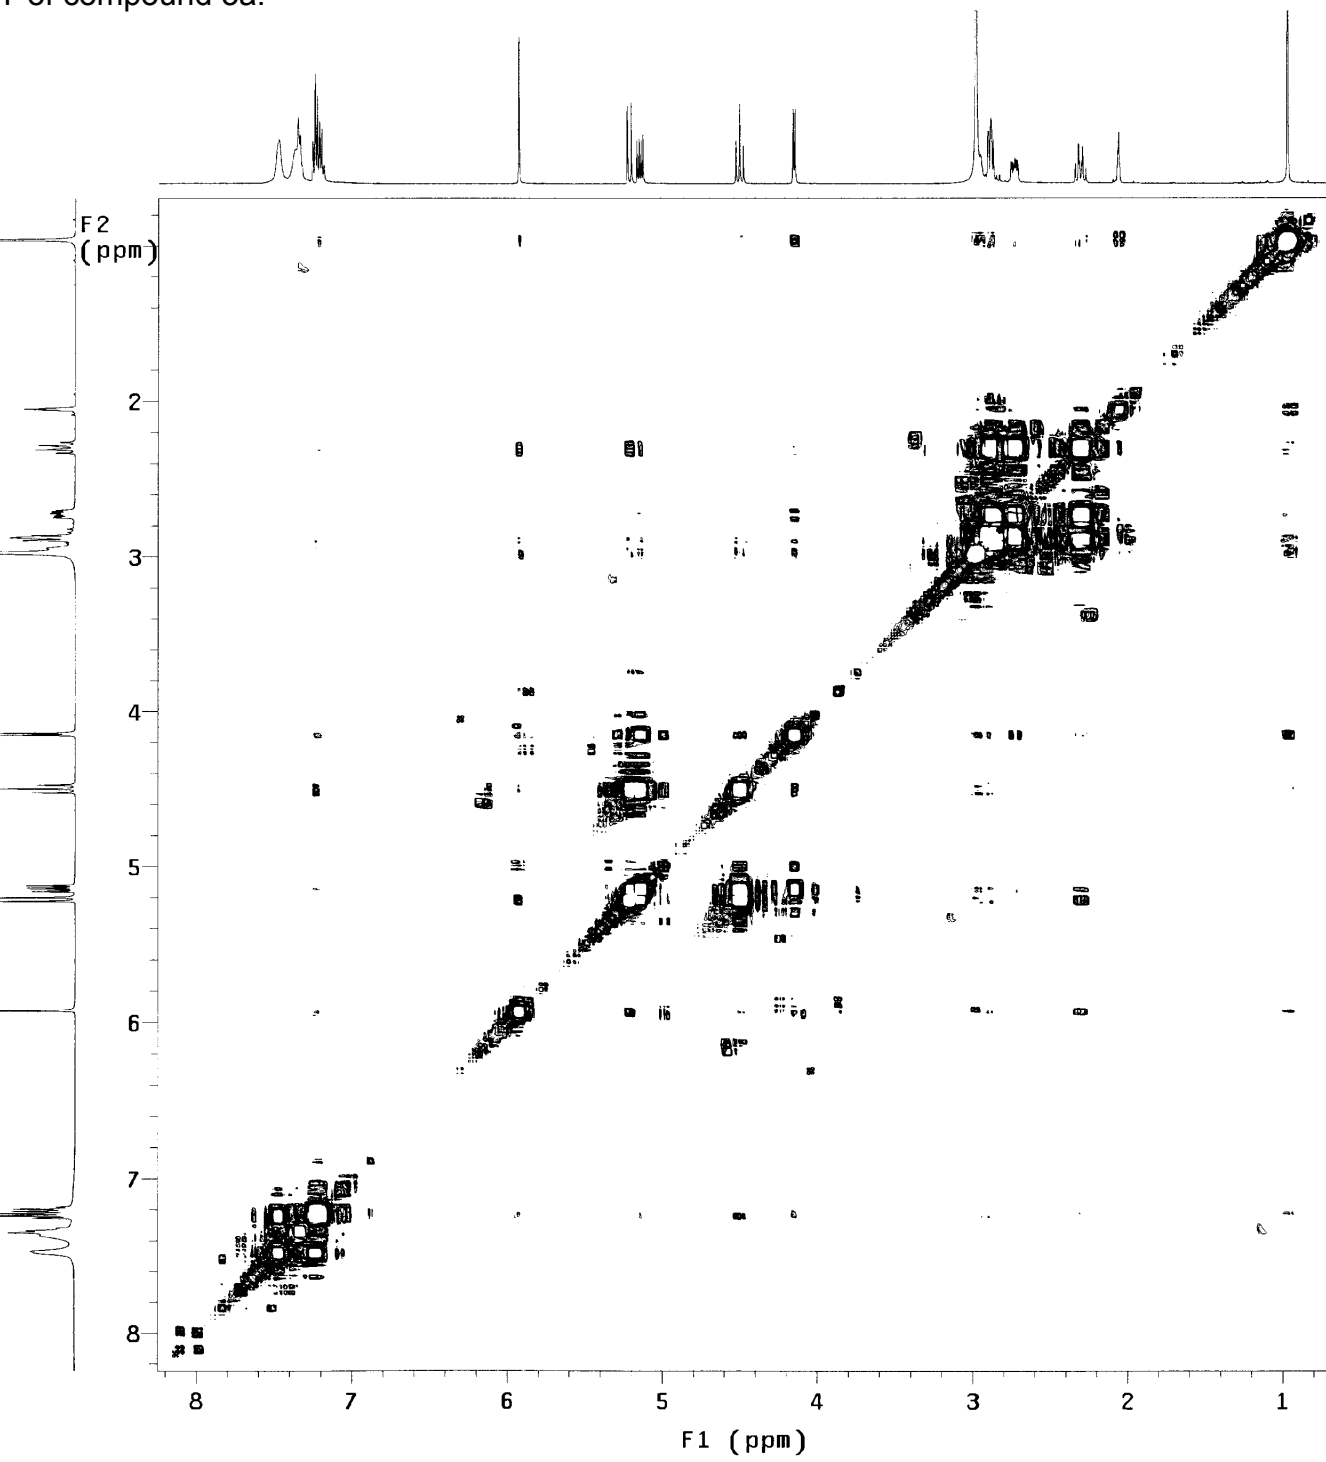

Fig S32. NOESY of compound 3a.

CJW-2-15-top  
exp151 NOESY

| SAMPLE         |             | FLAGS         |          |
|----------------|-------------|---------------|----------|
| date           | Dec 19 2014 | hs            | n        |
| solvent        | Acetone     | sspul         | y        |
| sample         | undefined   | PFGflg        | y        |
| ACQUISITION    |             | hsglv1        | 1004     |
| sw             | 4743.8      | SPECIAL       |          |
| at             | 0.216       | temp          | not used |
| np             | 2048        | gain          | 28       |
| fb             | not used    | spin          | 0        |
| ss             | 32          | F2 PROCESSING |          |
| d1             | 1.000       | gf            | 0.100    |
| nt             | 16          | gfs           | not used |
| 2D ACQUISITION |             | fn            | 2048     |
| sw1            | 4743.8      | F1 PROCESSING |          |
| ni             | 200         | gf1           | 0.039    |
| TRANSMITTER    |             | gfs1          | not used |
| tn             | H1          | proc1         | lp       |
| sfrq           | 499.835     | fn1           | 2048     |
| tof            | -375.0      | DISPLAY       |          |
| tpwr           | 62          | sp            | 312.0    |
| pw             | 13.800      | wp            | 3525.4   |
| NOESY          |             | sp1           | 312.4    |
| mix            | 0.600       | wp1           | 3525.4   |
| PRESATURATION  |             | rfl           | 3215.2   |
| satmode        | nnnn        | rfp           | 2962.0   |
| satpwr         | 0           | rfl1          | 3214.8   |
| satdly         | 0           | rfp1          | 2962.0   |
| satfrq         | 0           | PLOT          |          |
| DECOUPLER      |             | wc            | 155.0    |
| dn             | C13         | sc            | 10.0     |
| dm             | nnn         | wc2           | 155.0    |
|                |             | sc2           | 0        |
|                |             | vs            | 736      |
|                |             | th            | 1        |
|                |             | ai            | ph       |

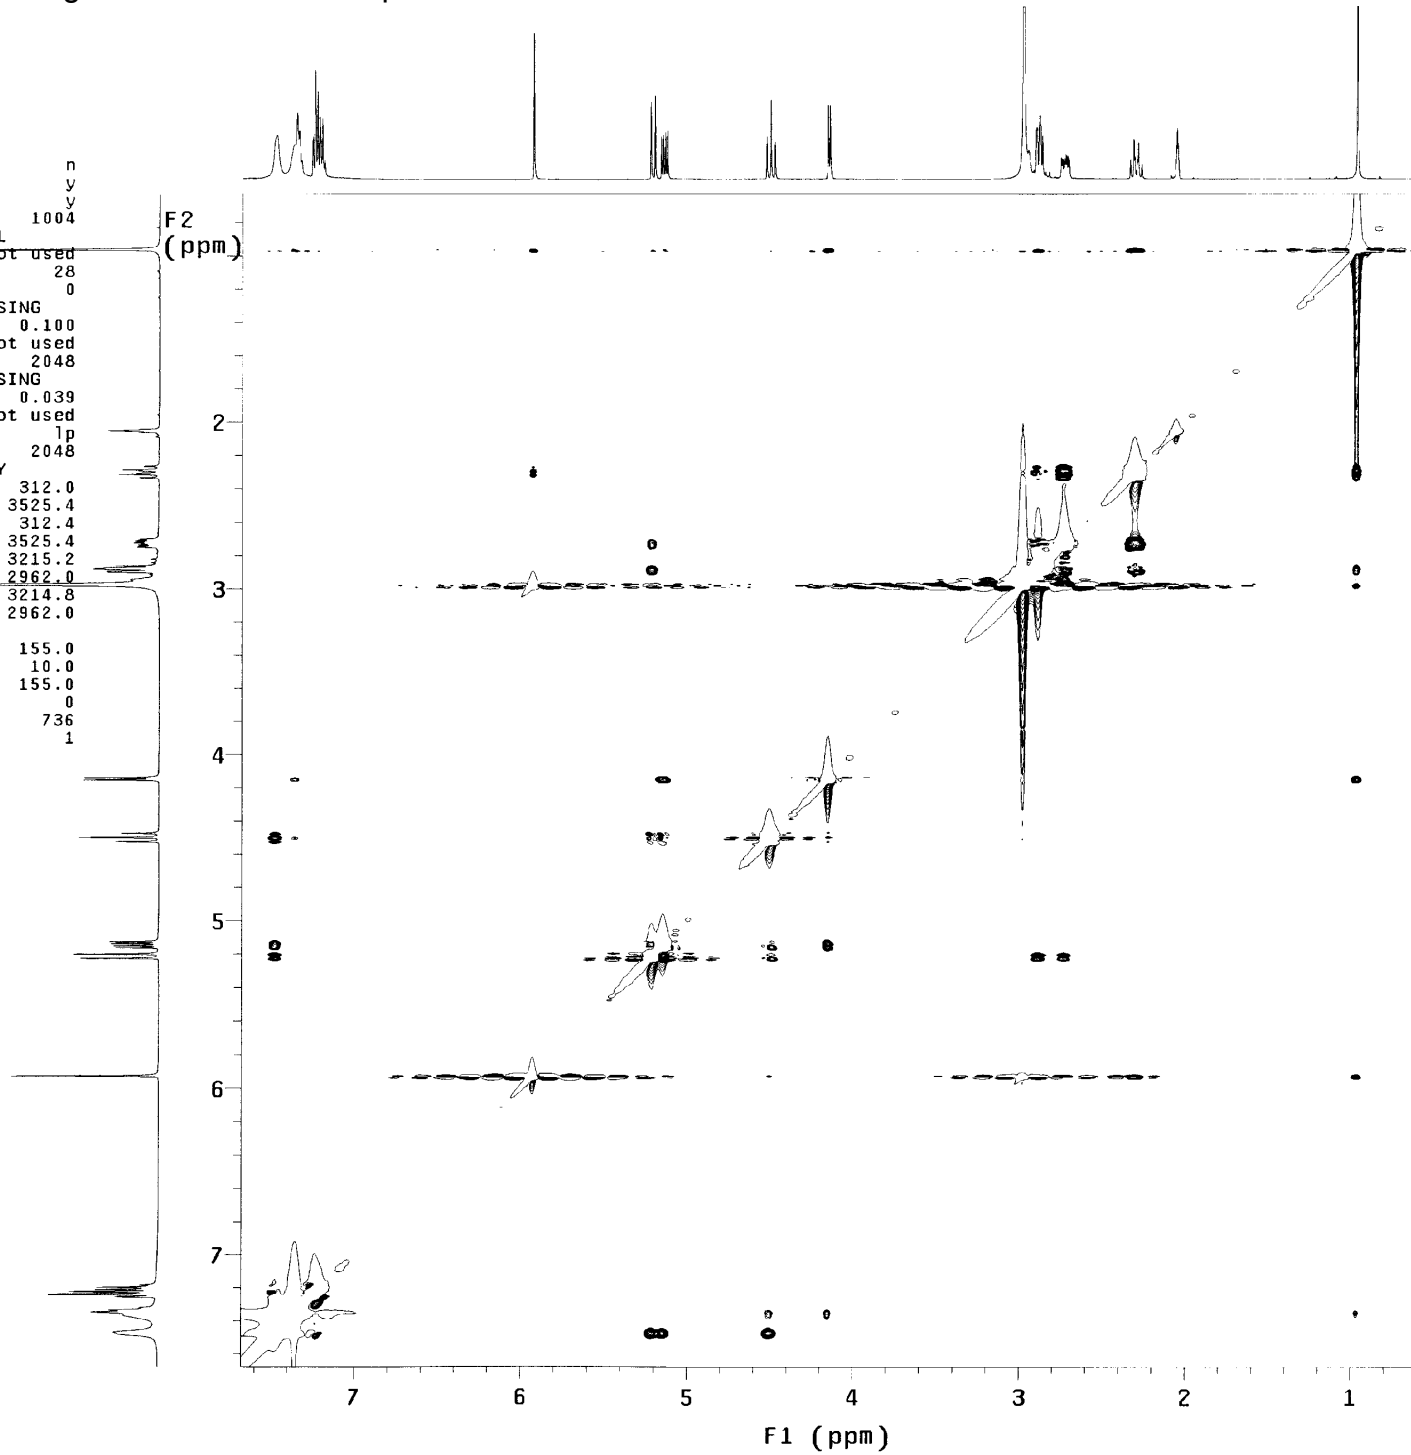

Fig S33. <sup>1</sup>H NMR (acetone-d<sub>6</sub>, 500 MHz) of compound 5a.

CHP-8a-12

Sample Name **CHP-8a-12**  
Date collected **2016-05-17**

Pulse sequence **PROTON**  
Solvent **acetone**

Temperature **25**  
Spectrometer **Agilent-NMR-inova500**

Study owner **vnmr2**  
Operator **vnmr2**

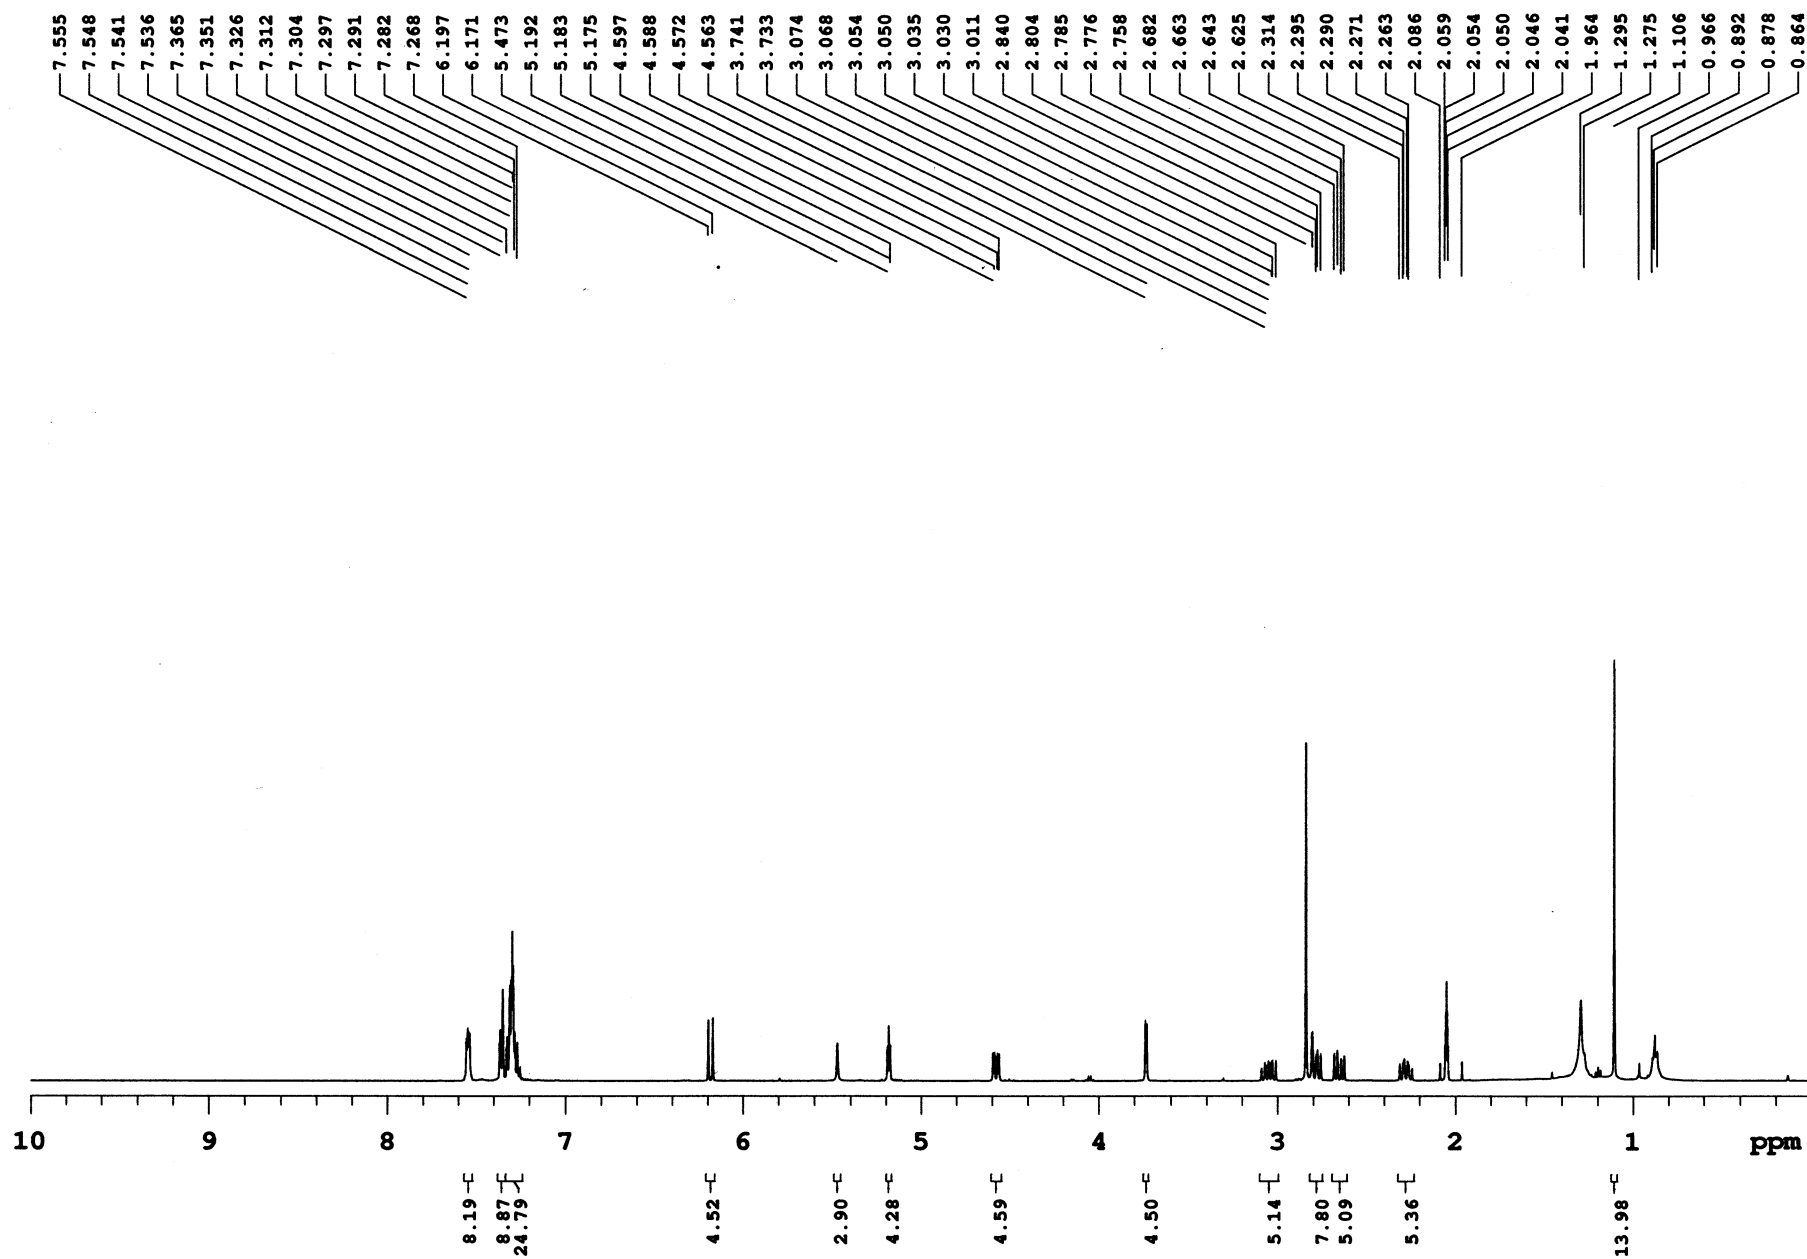

Fig S34. <sup>13</sup>C NMR (acetone-d<sub>6</sub>, 125 MHz) of compound 5a.

CHP-8a-f2

Sample Name **CHP-8a-f2**  
Date collected **2016-05-17**

Pulse sequence **CARBON**  
Solvent **acetone**

Temperature **25**  
Spectrometer **Agilent-NMR-inova500**

Study owner **vnmr2**  
Operator **vnmr2**

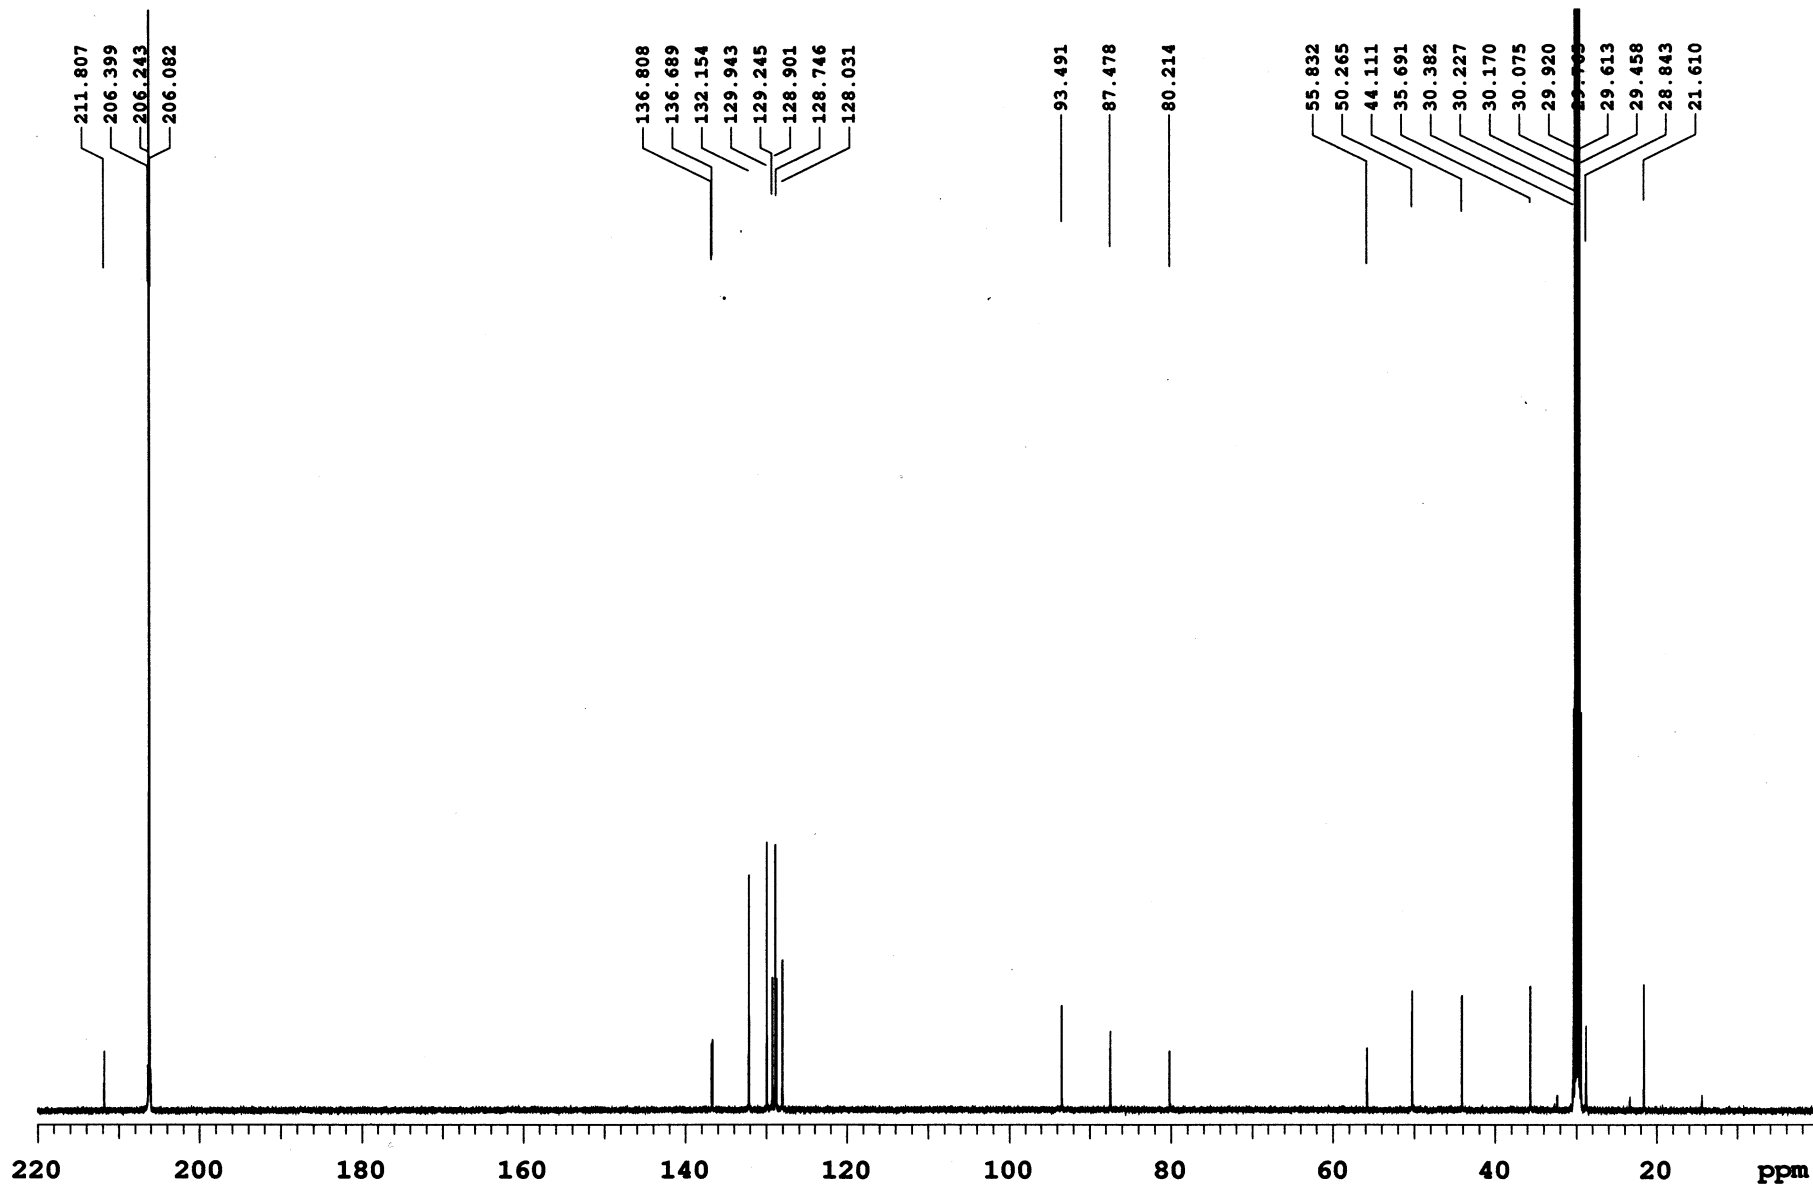

Fig S35. DEPT of compound 5a.

CHP-8a-f2

Sample Name **CHP-8a-f2**  
Date collected **2016-05-18**

Pulse sequence **DEPT**  
Solvent **acetone**

Temperature **25**  
Spectrometer **Agilent-NMR-inova500**

Study owner **vnmr2**  
Operator **vnmr2**

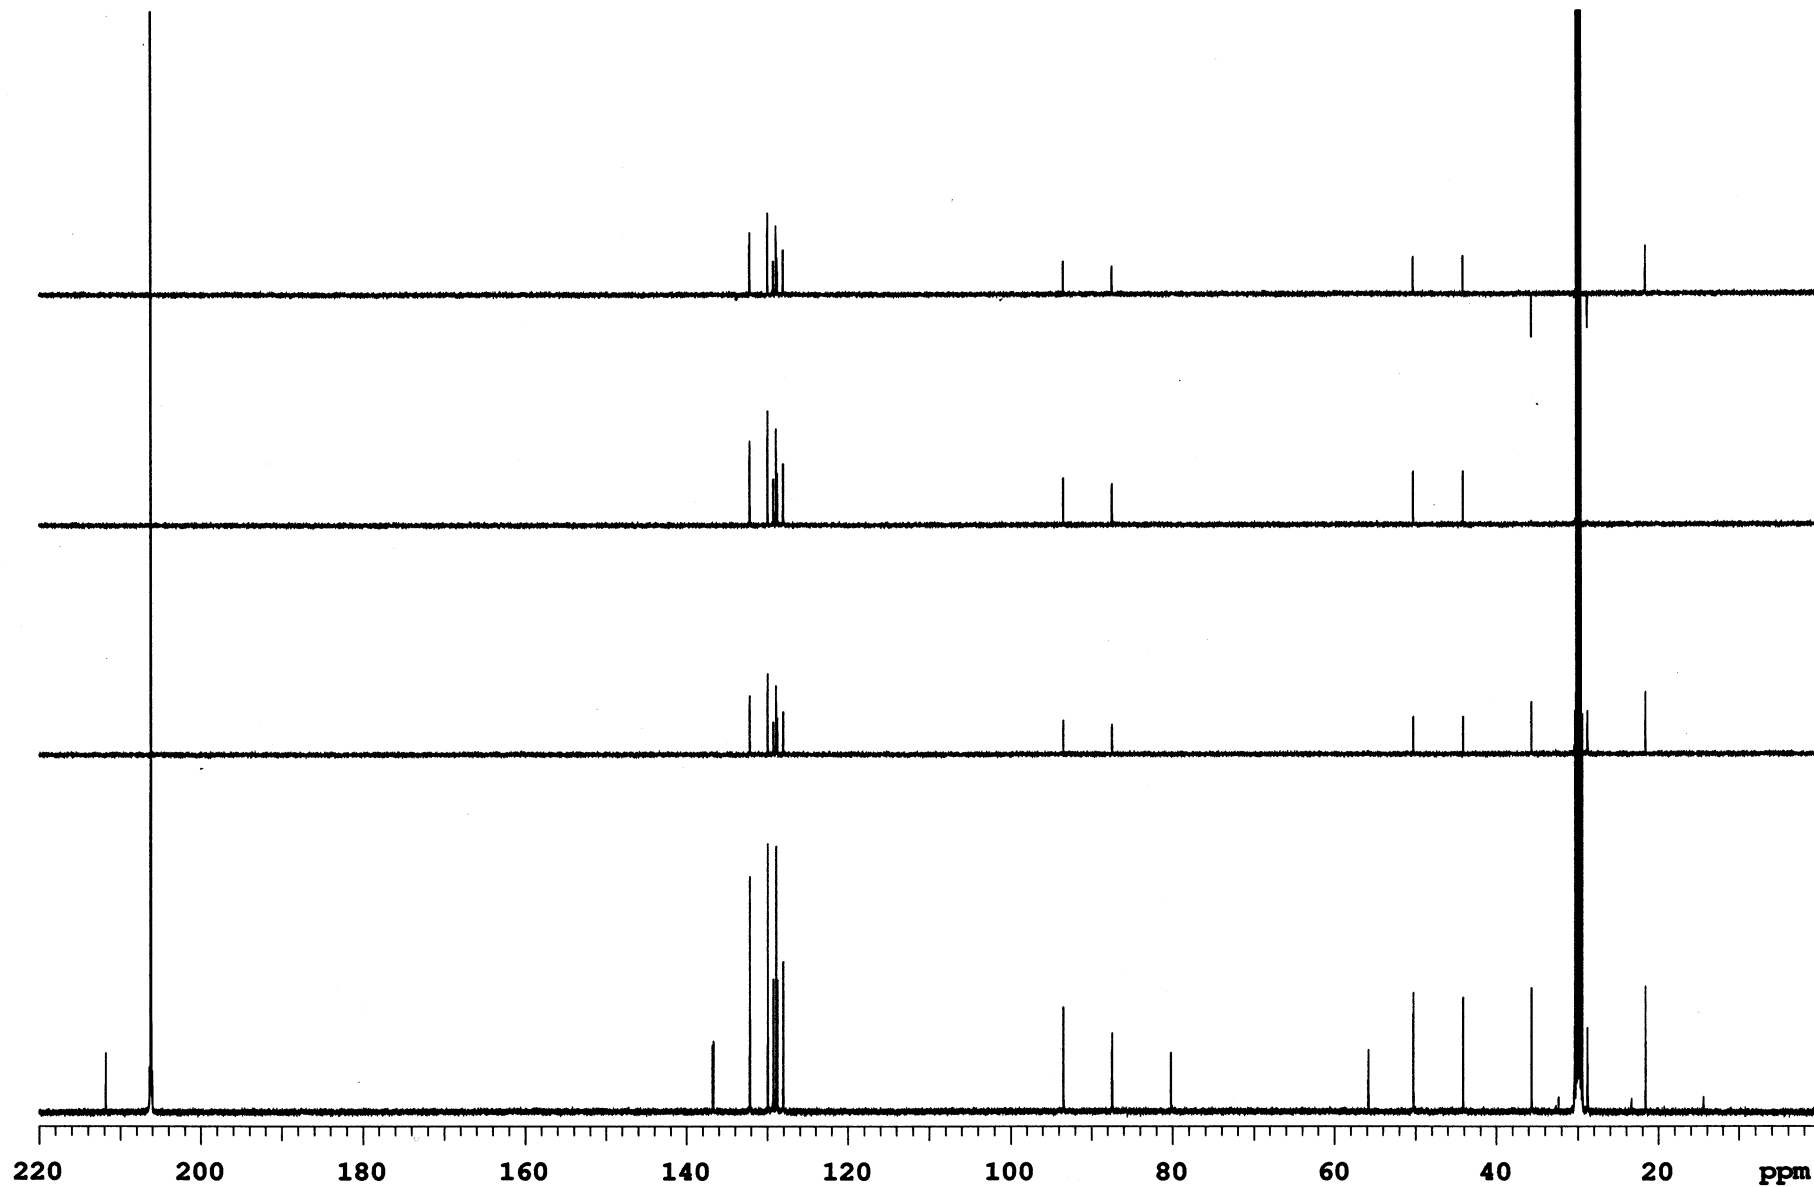

Fig S36. HSQC of compound 5a.

CHP-8a-f2

Sample Name **CHP-8a-f2**  
Date collected **2016-05-18**

Pulse sequence **gHSQC**  
Solvent **acetone**

Temperature **25**  
Spectrometer **Agilent-NMR-inova500**

Study owner **vnmr2**  
Operator **vnmr2**

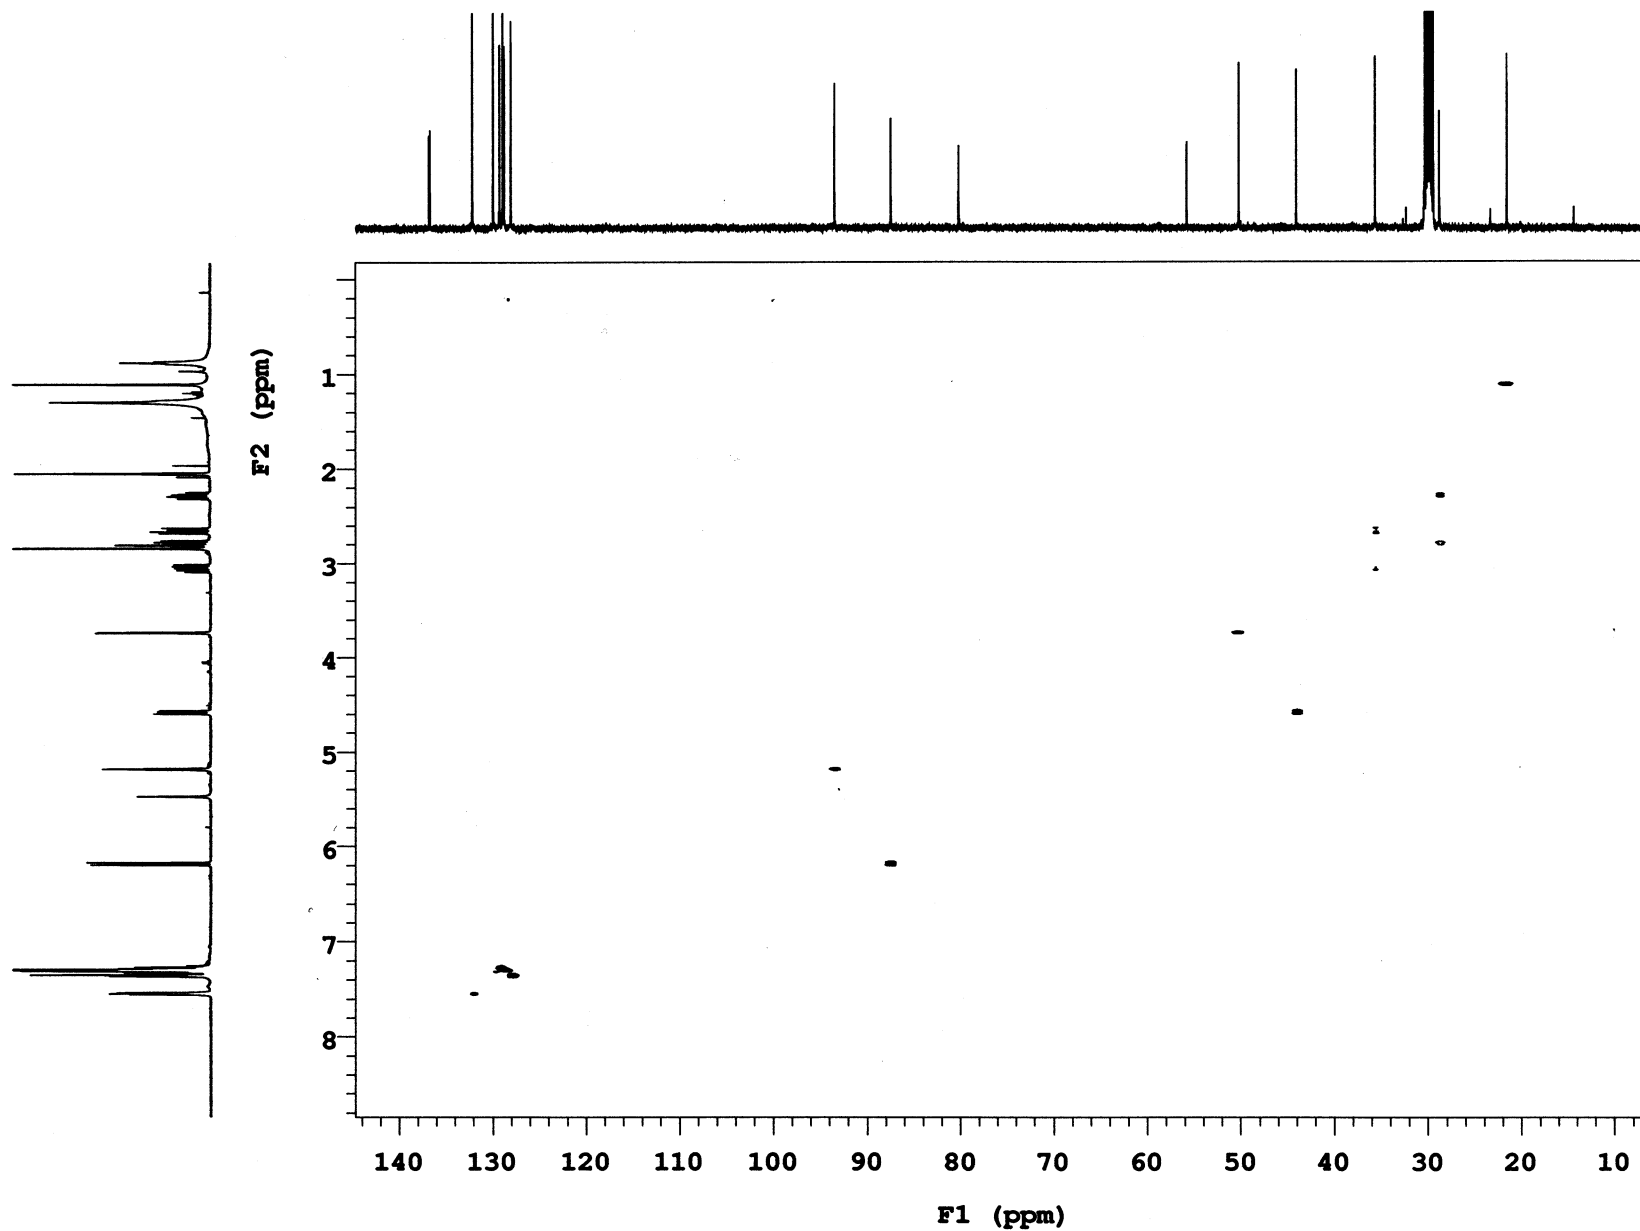



Fig S37. COSY of compound 5a.

CHP-8a-f2

Sample Name **CHP-8a-f2**  
Date collected **2016-05-18**

Pulse sequence **gCOSY**  
Solvent **acetone**

Temperature **25**  
Spectrometer **Agilent-NMR-inova500**

Study owner **vnmr2**  
Operator **vnmr2**

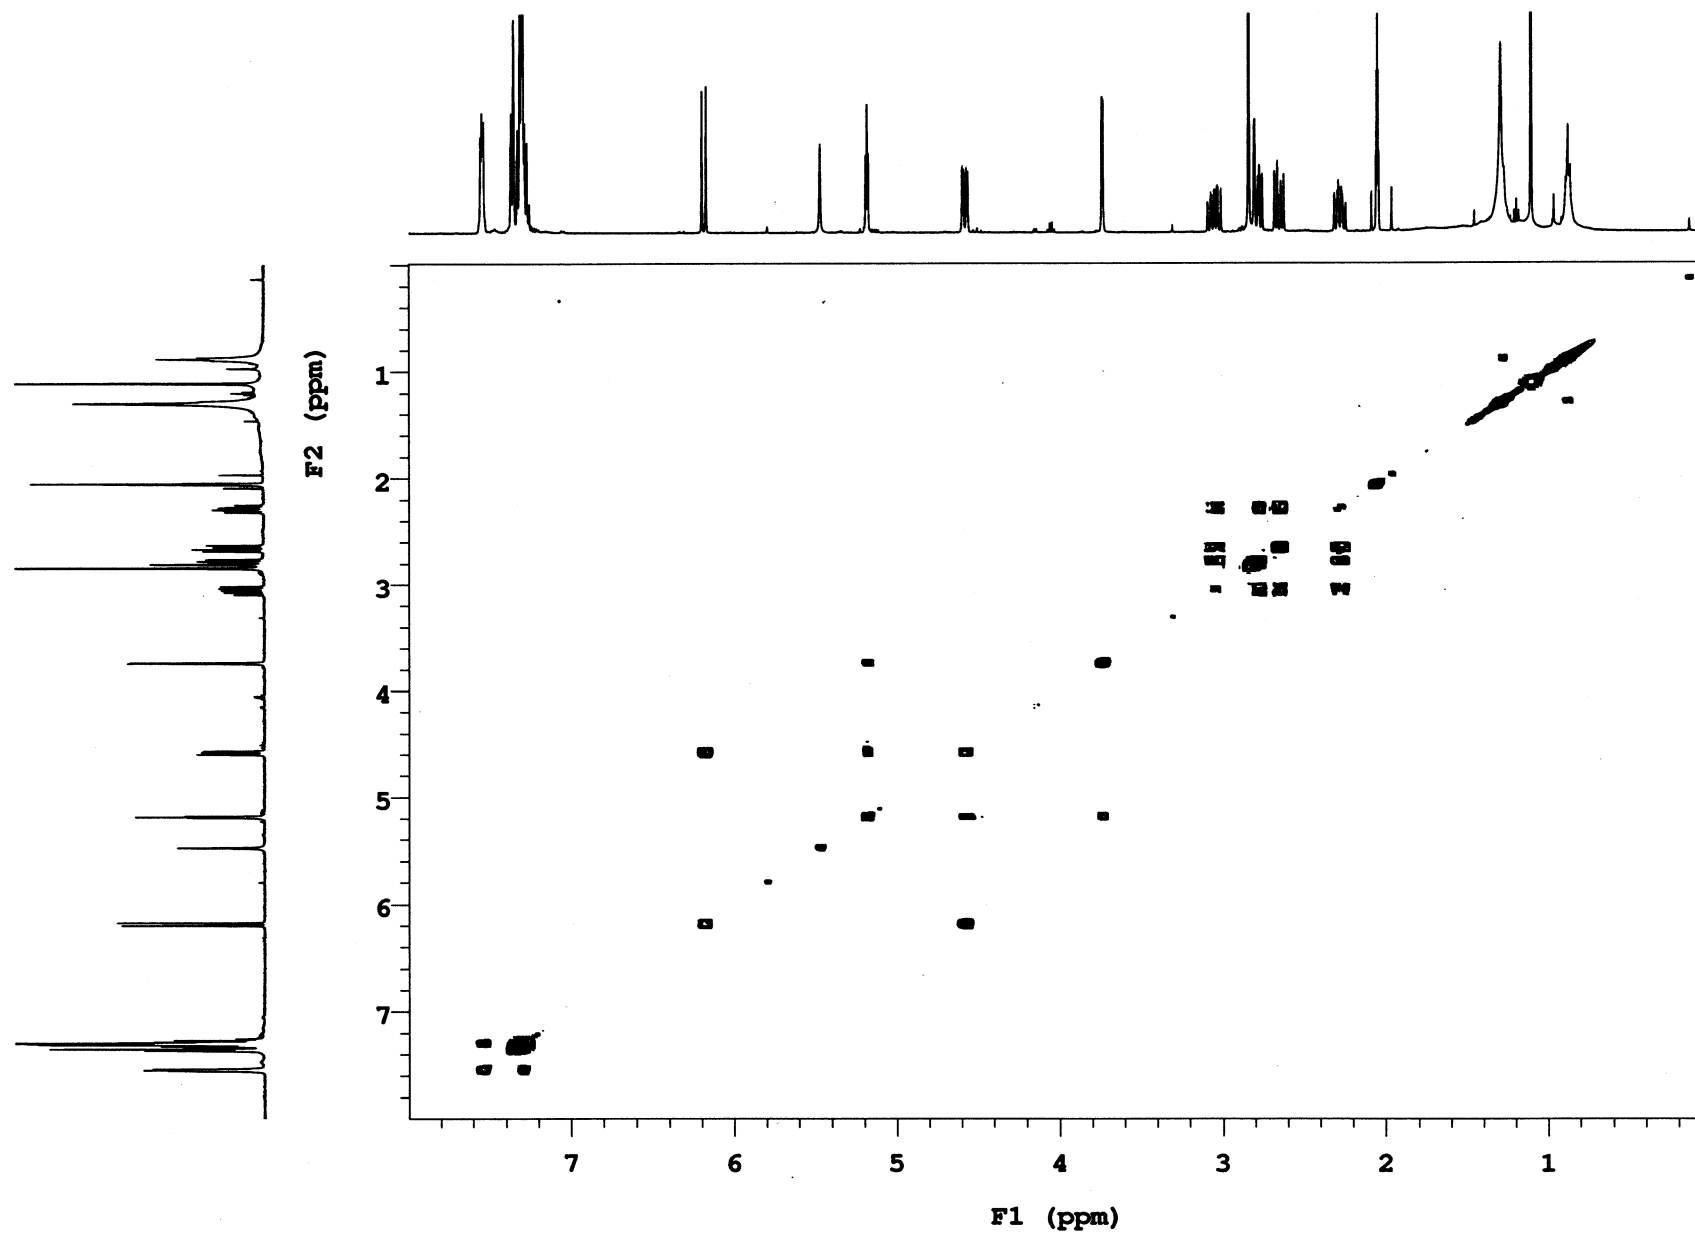

Fig S38. NOESY of compound 5a.

CHP-8a-f2

Sample Name **CHP-8a-f2**  
Date collected **2016-05-18**

Pulse sequence **NOESY**  
Solvent **acetone**

Temperature **25**  
Spectrometer **Agilent-NMR-inova500**

Study owner **vnmr2**  
Operator **vnmr2**

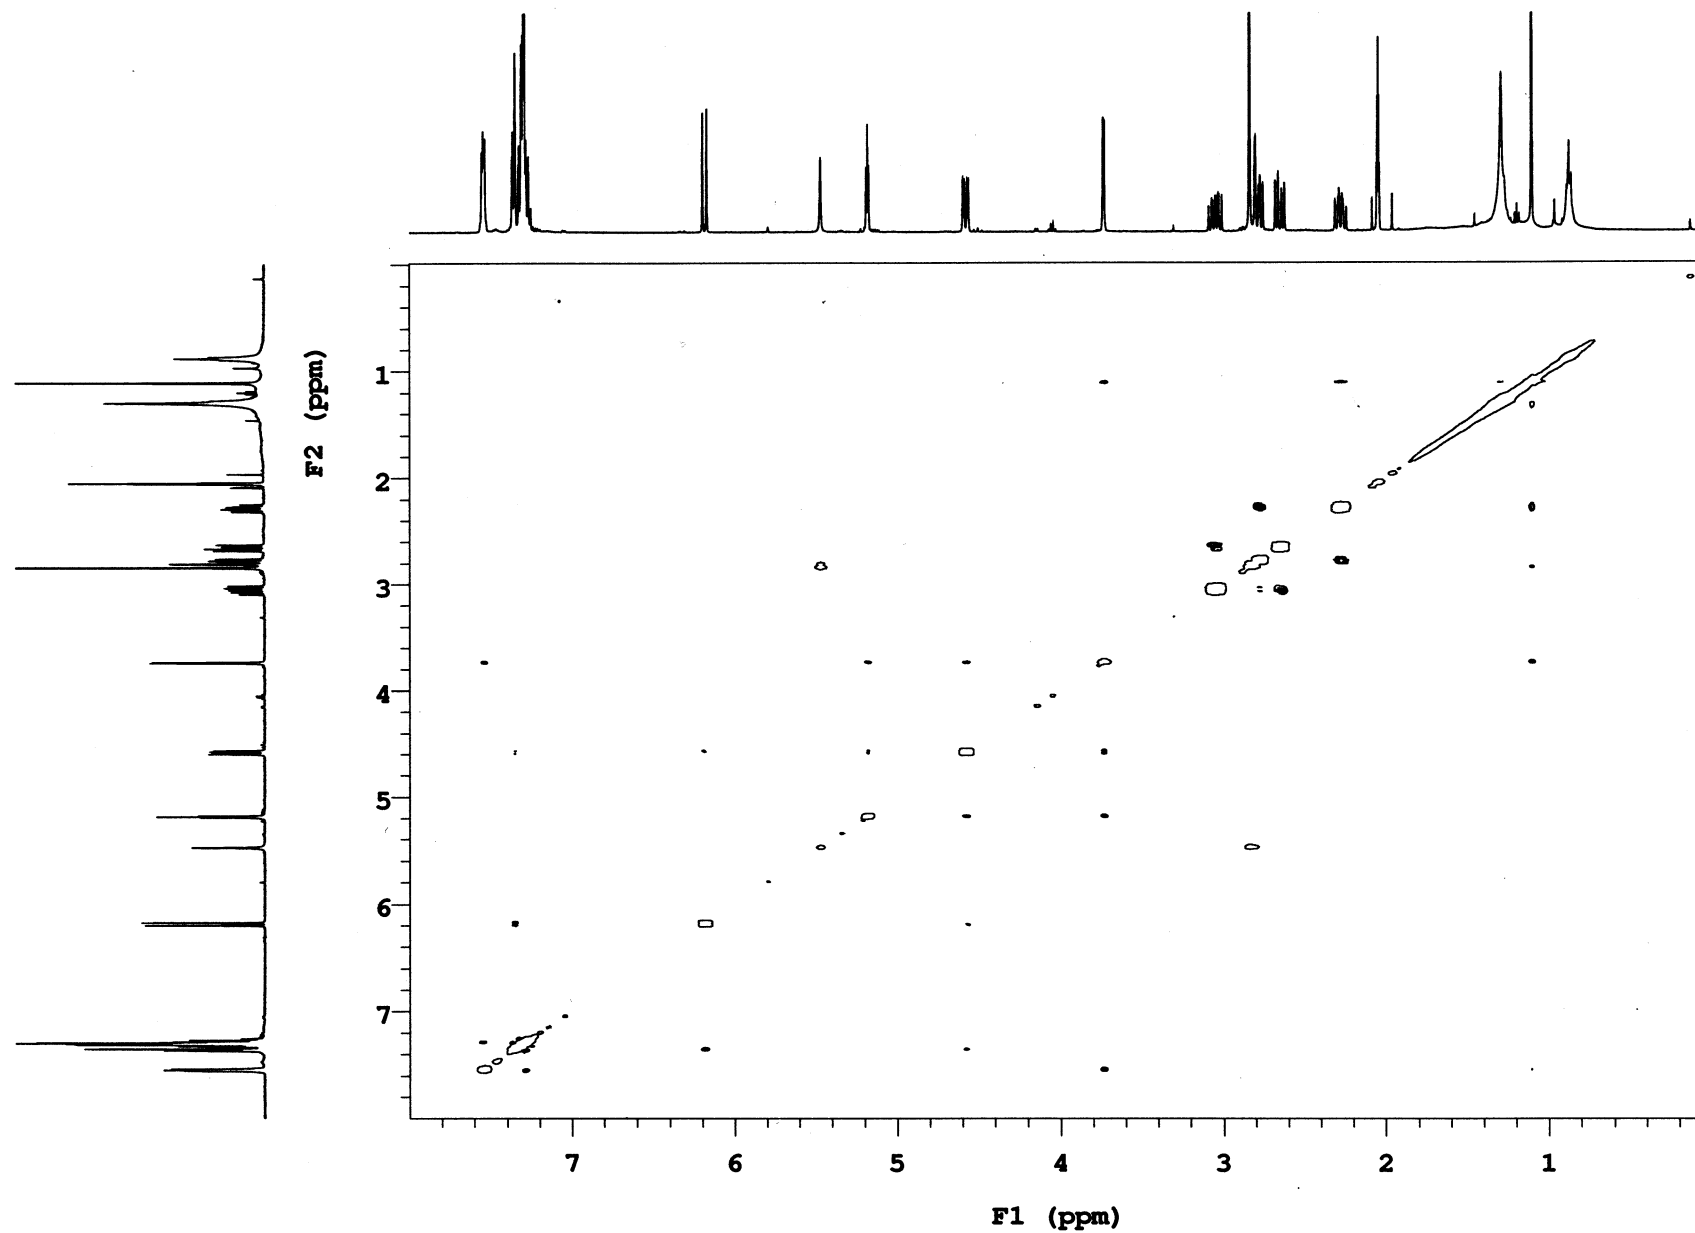

Fig S39. NOESY of compound 5a, expanded.

CHP-8a-f2

Sample Name **CHP-8a-f2**  
Date collected **2016-05-18**

Pulse sequence **NOESY**  
Solvent **acetone**

Temperature **25**  
Spectrometer **Agilent-NMR-inova500**

Study owner **vnmr2**  
Operator **vnmr2**

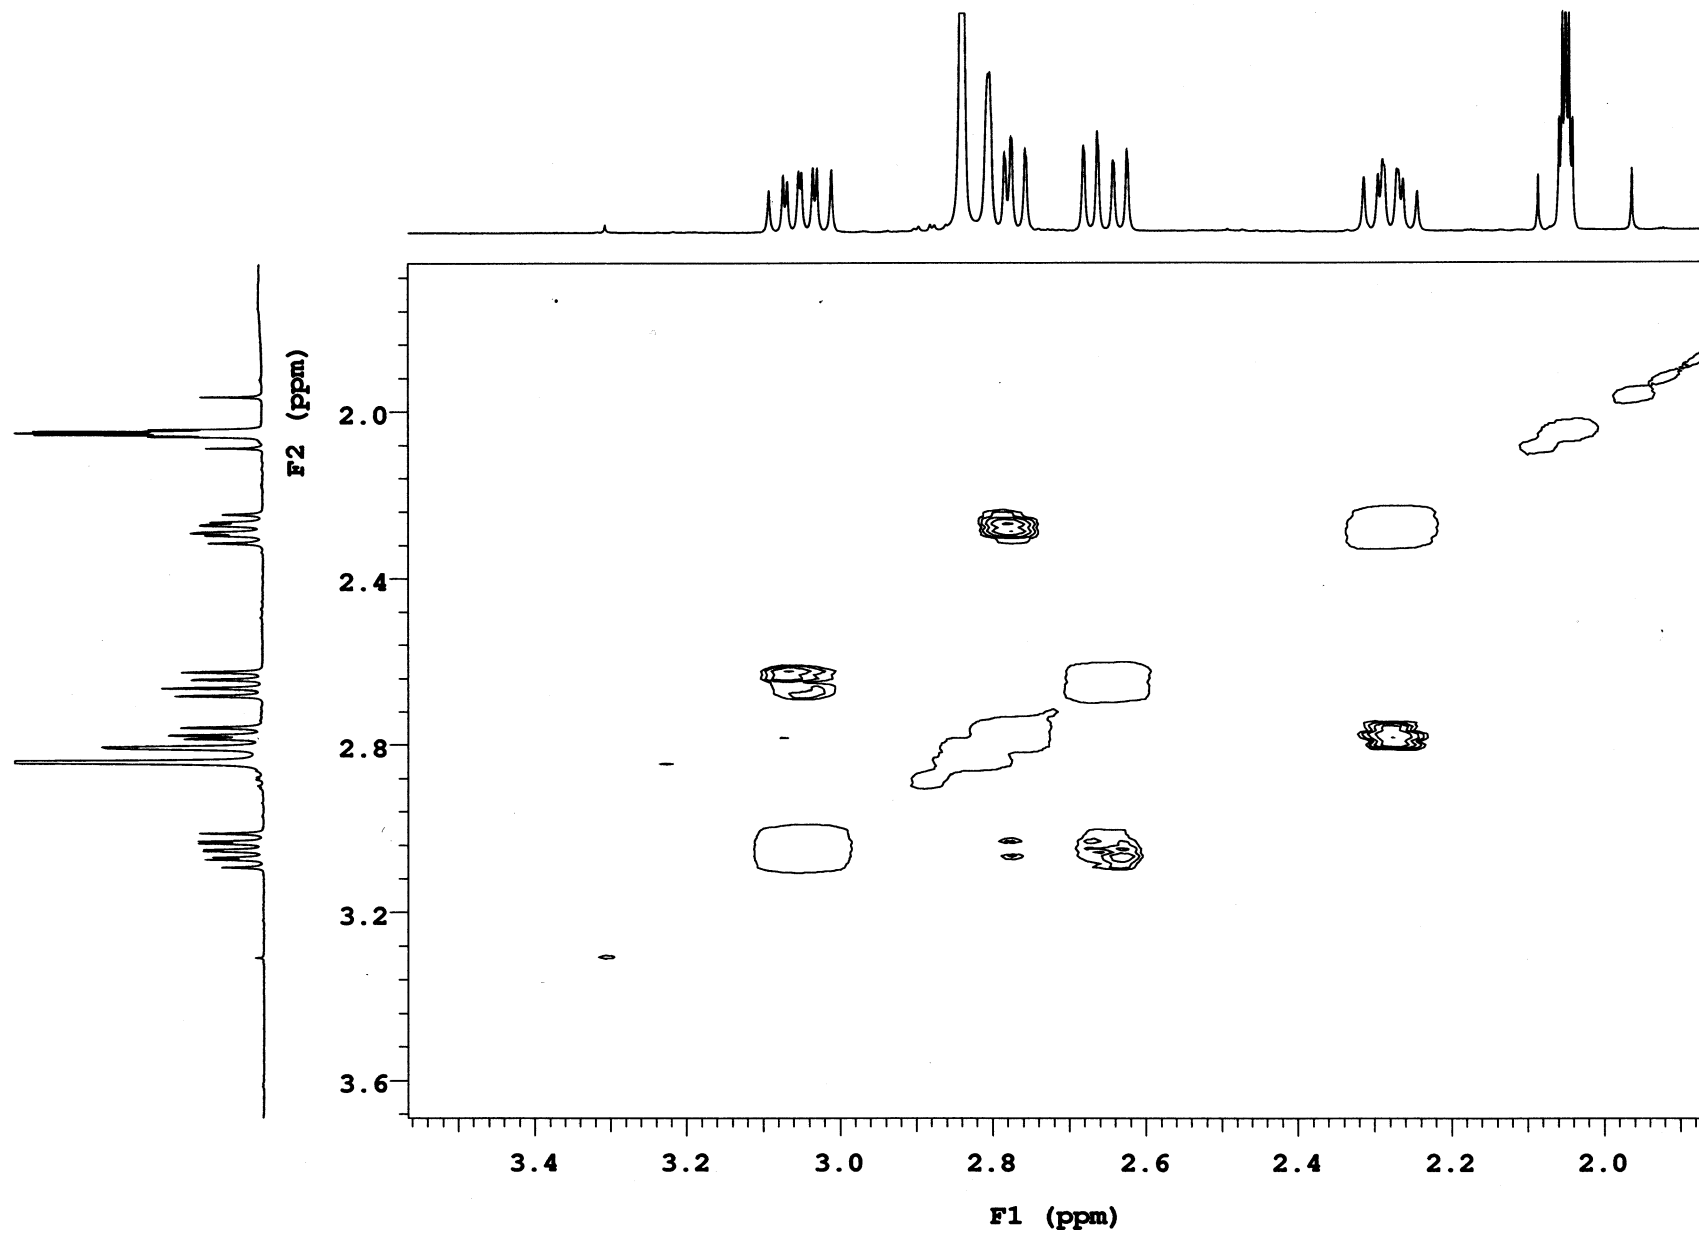

Fig S40. <sup>1</sup>H NMR (CD<sub>3</sub>CN, 500 MHz) of compound 3b.

CHP-8b

|                |            |                |        |              |                      |             |       |
|----------------|------------|----------------|--------|--------------|----------------------|-------------|-------|
| Sample Name    | CHP-8b     | Pulse sequence | PROTON | Temperature  | 25                   | Study owner | vnmr2 |
| Date collected | 2016-03-25 | Solvent        | cd3cn  | Spectrometer | Agilent-NMR-inova500 | Operator    | vnmr2 |

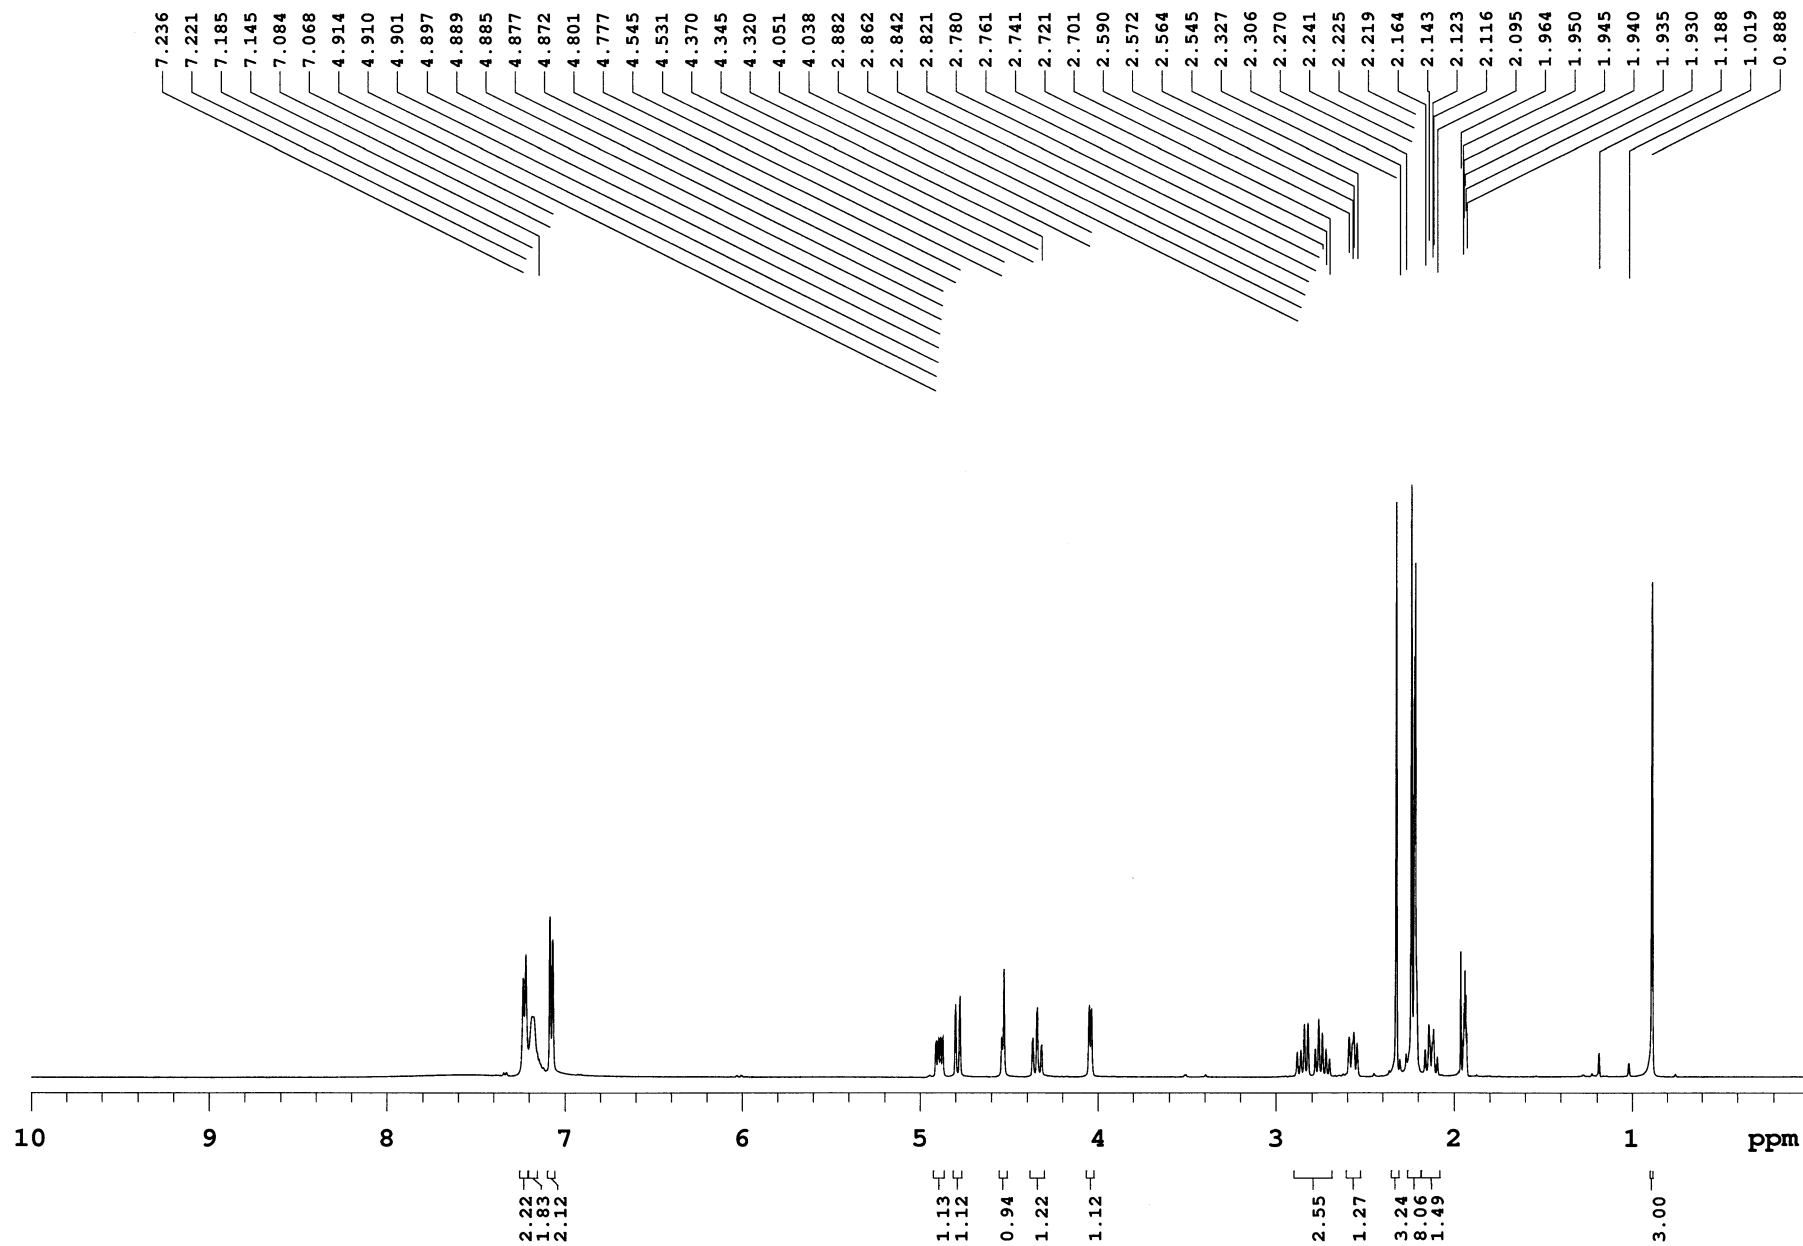

Fig S41. <sup>13</sup>C NMR (CD<sub>3</sub>CN, 125 MHz) of compound 3b.

CHP-8b

Sample Name **CHP-8b**  
Date collected **2016-03-25**

Pulse sequence **CARBON**  
Solvent **cd3cn**

Temperature **25**  
Spectrometer **Agilent-NMR-inova500**

Study owner **vnmr2**  
Operator **vnmr2**

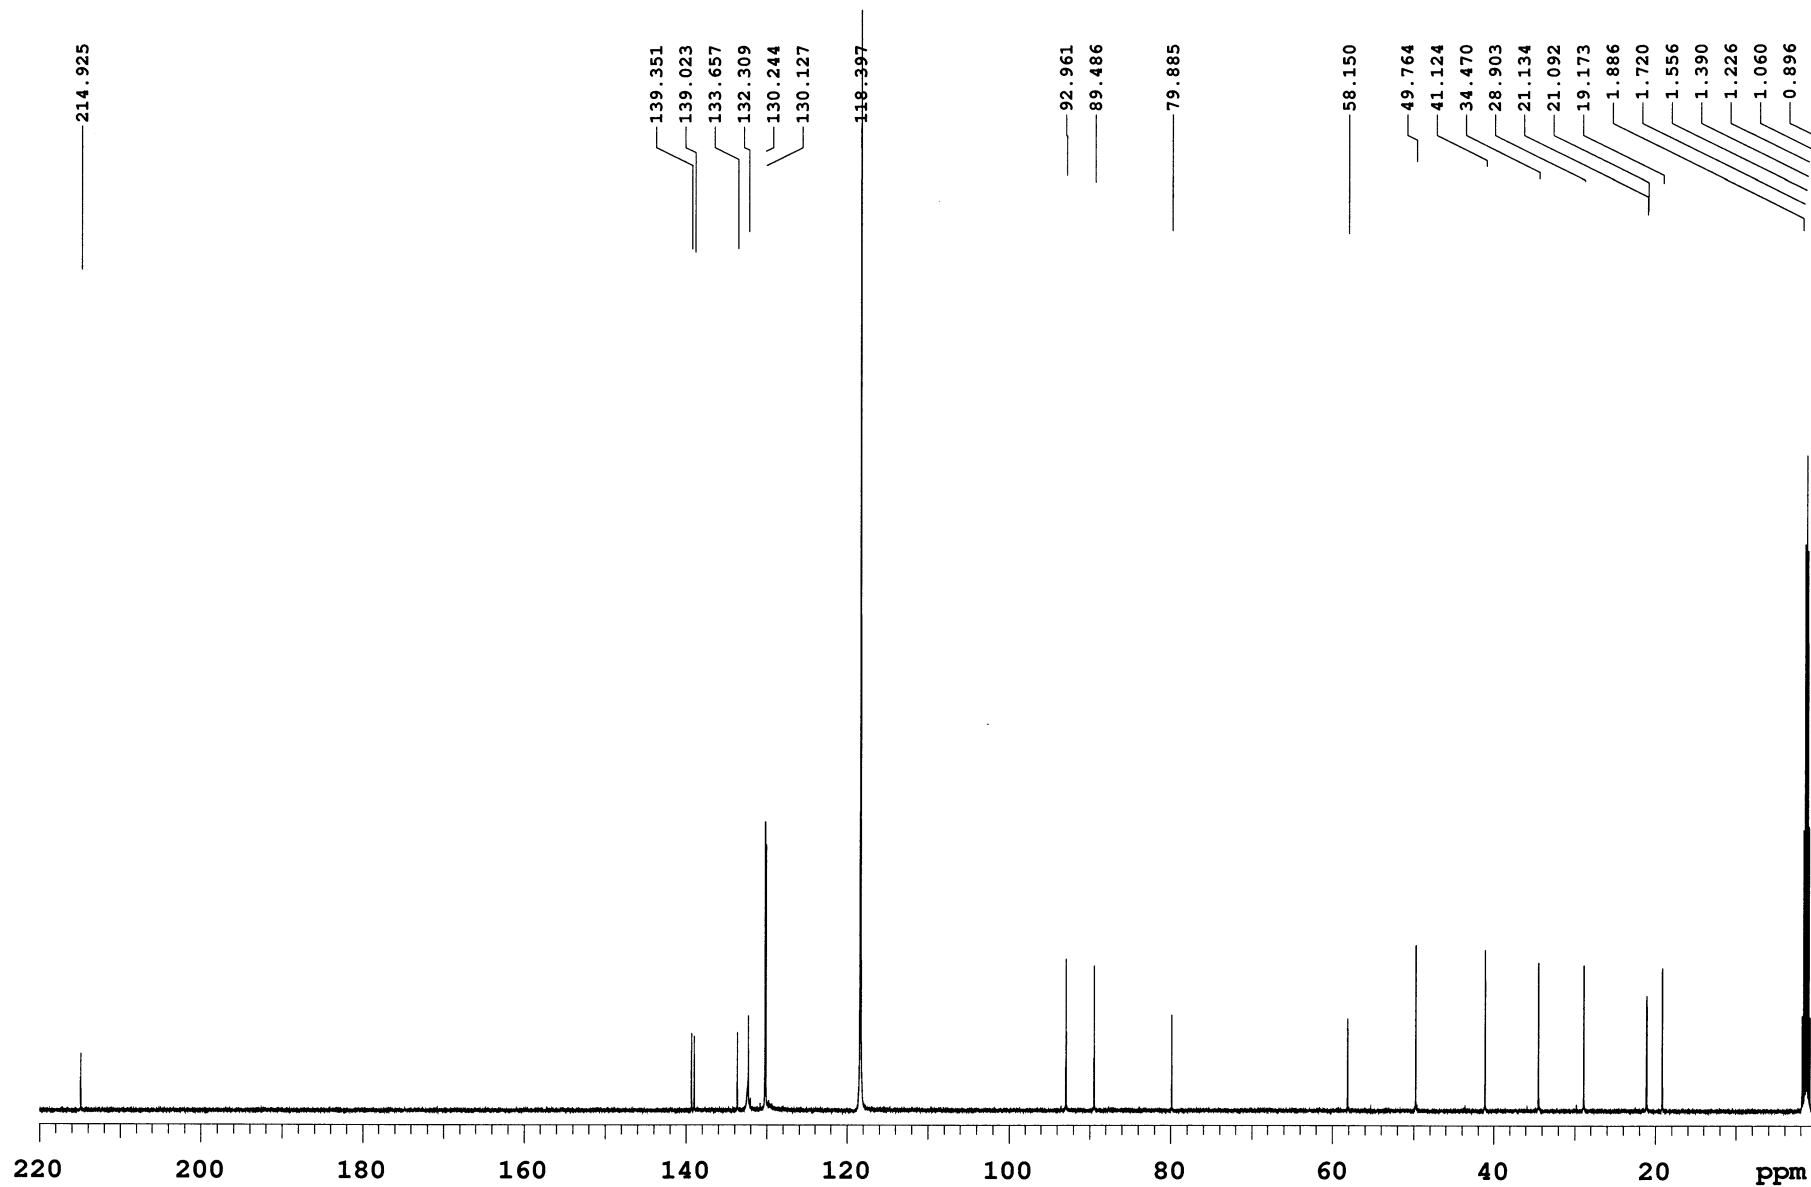

Fig S42. DEPT of compound 3b.

CHP-8b

Sample Name **CHP-8b**  
Date collected **2016-03-25**

Pulse sequence **DEPT**  
Solvent **cd3cn**

Temperature **25**  
Spectrometer **Agilent-NMR-inova500**

Study owner **vnmr2**  
Operator **vnmr2**

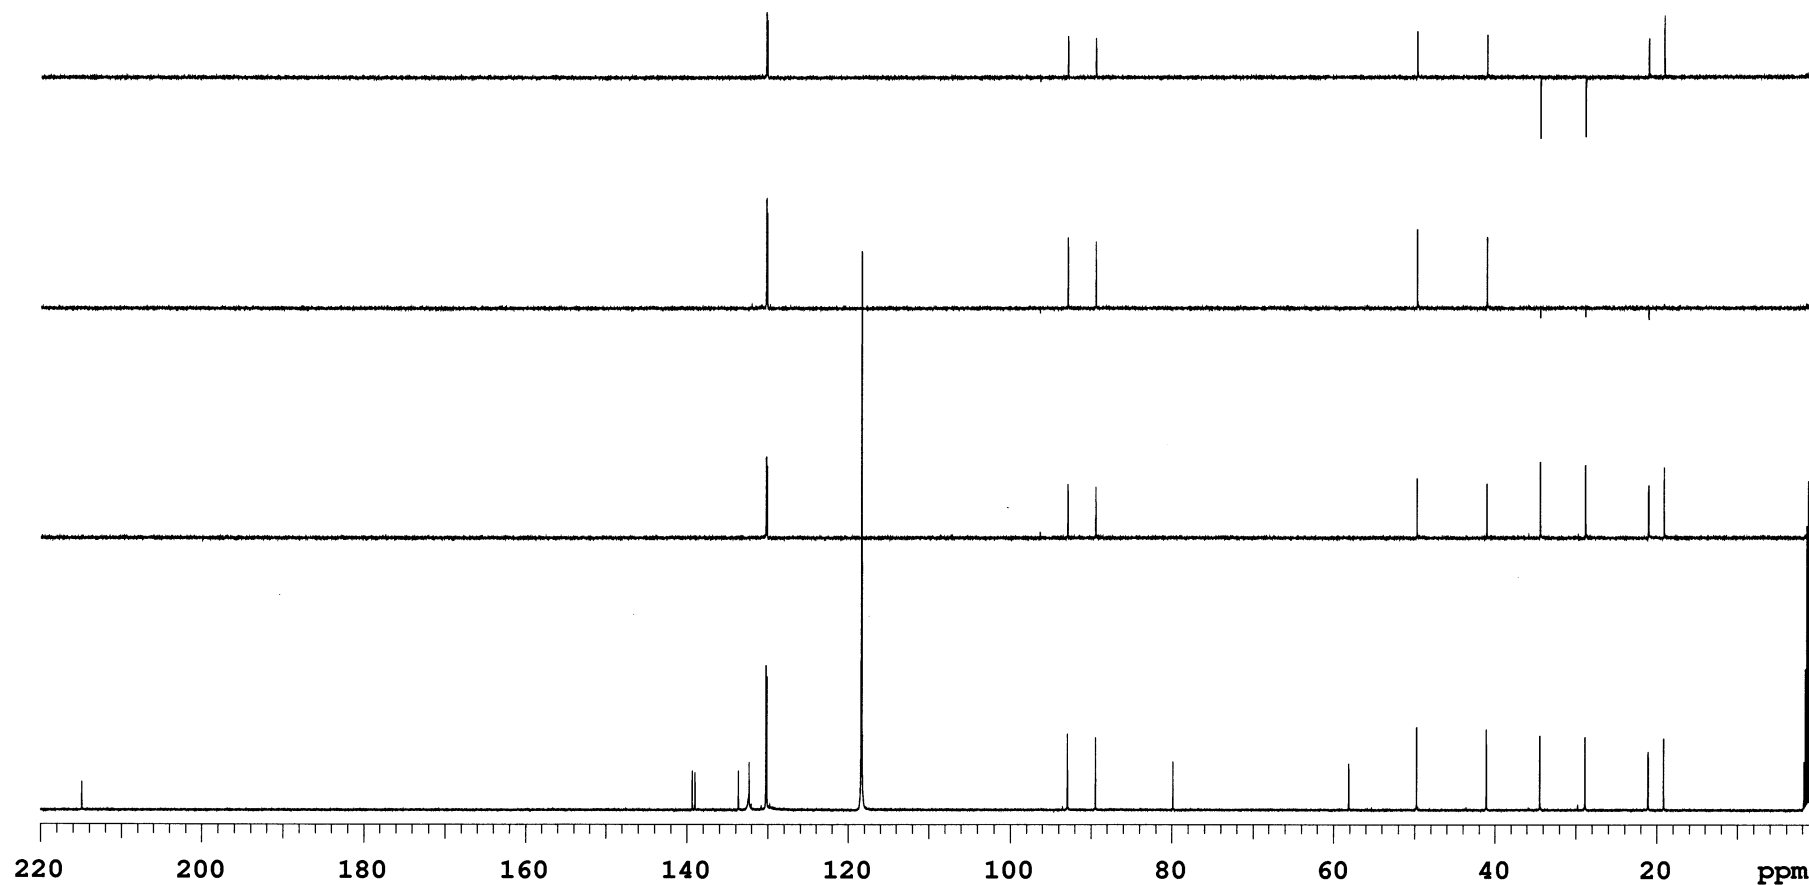

Fig S43. HSQC of compound 3b.

CHP-8b

Sample Name **CHP-8b**  
Date collected **2016-03-25**

Pulse sequence **gHSQC**  
Solvent **cd3cn**

Temperature **25**  
Spectrometer **Agilent-NMR-inova500**

Study owner **vnmr2**  
Operator **vnmr2**

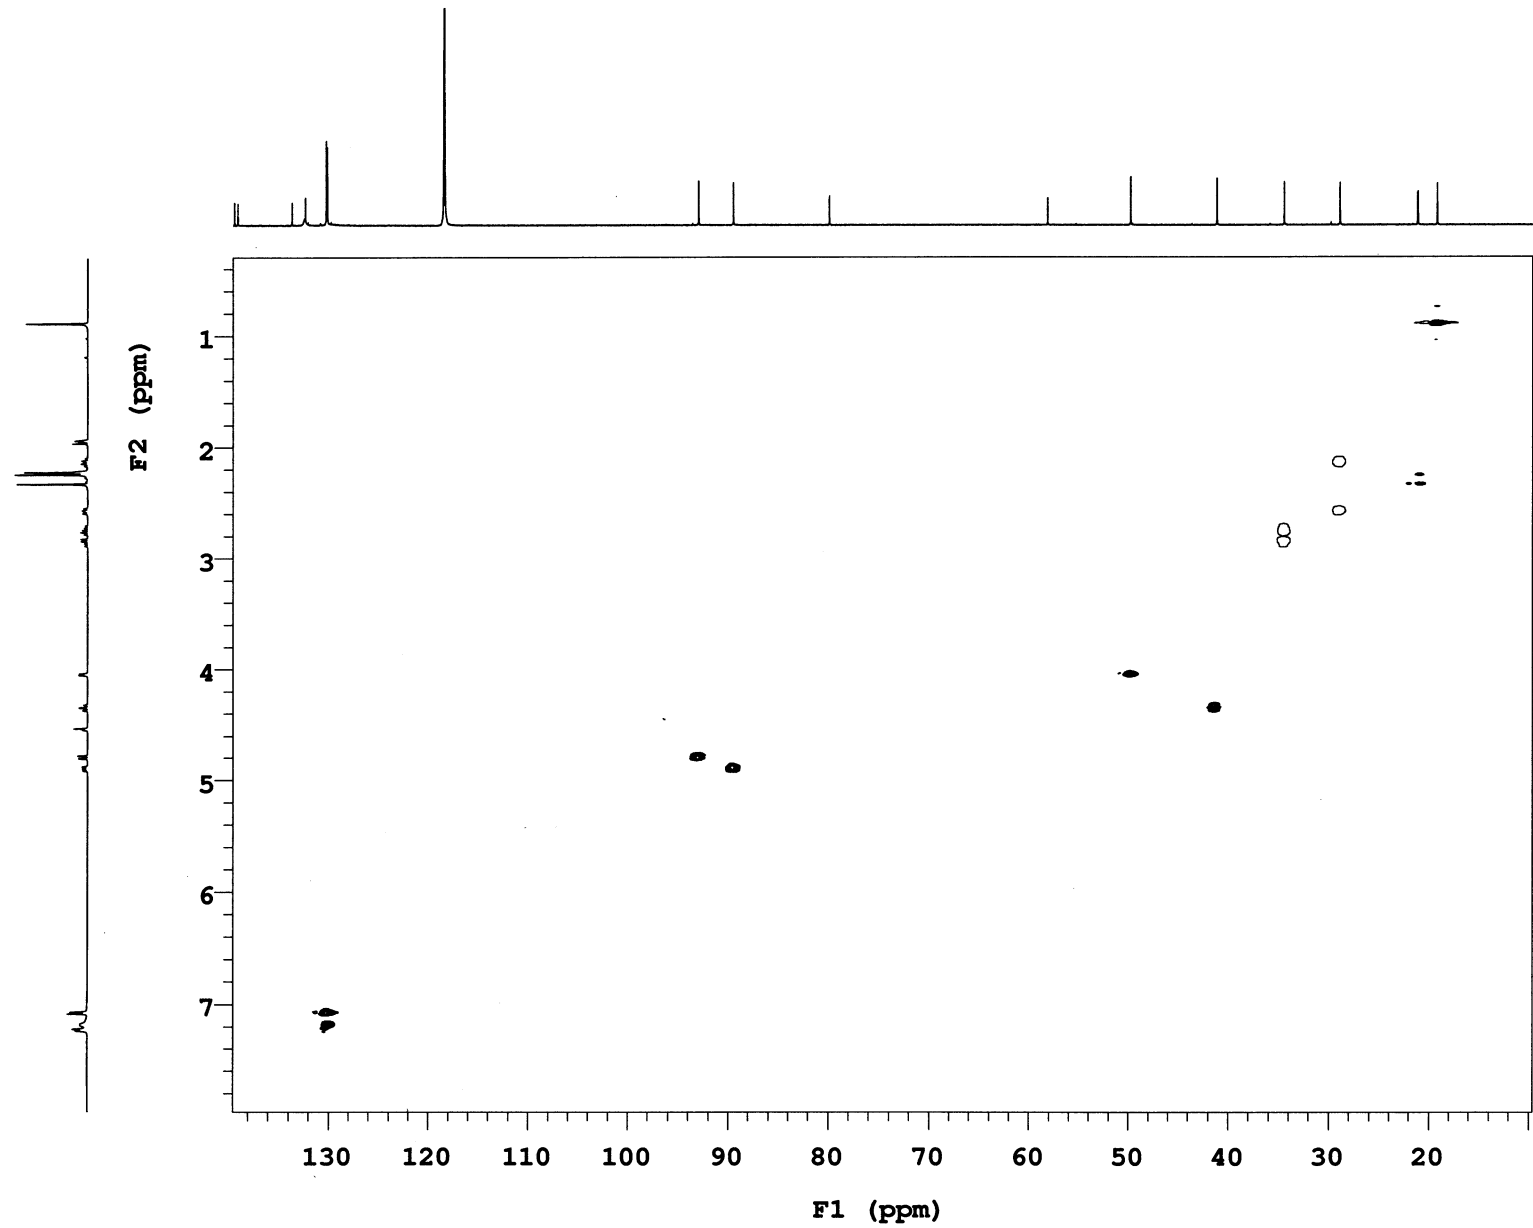

Fig S44. COSY of compound 3b.

CHP-8b

Sample Name **CHP-8b**  
Date collected **2016-03-25**

Pulse sequence **gCOSY**  
Solvent **cd3cn**

Temperature **25**  
Spectrometer **Agilent-NMR-inova500**

Study owner **vnmr2**  
Operator **vnmr2**

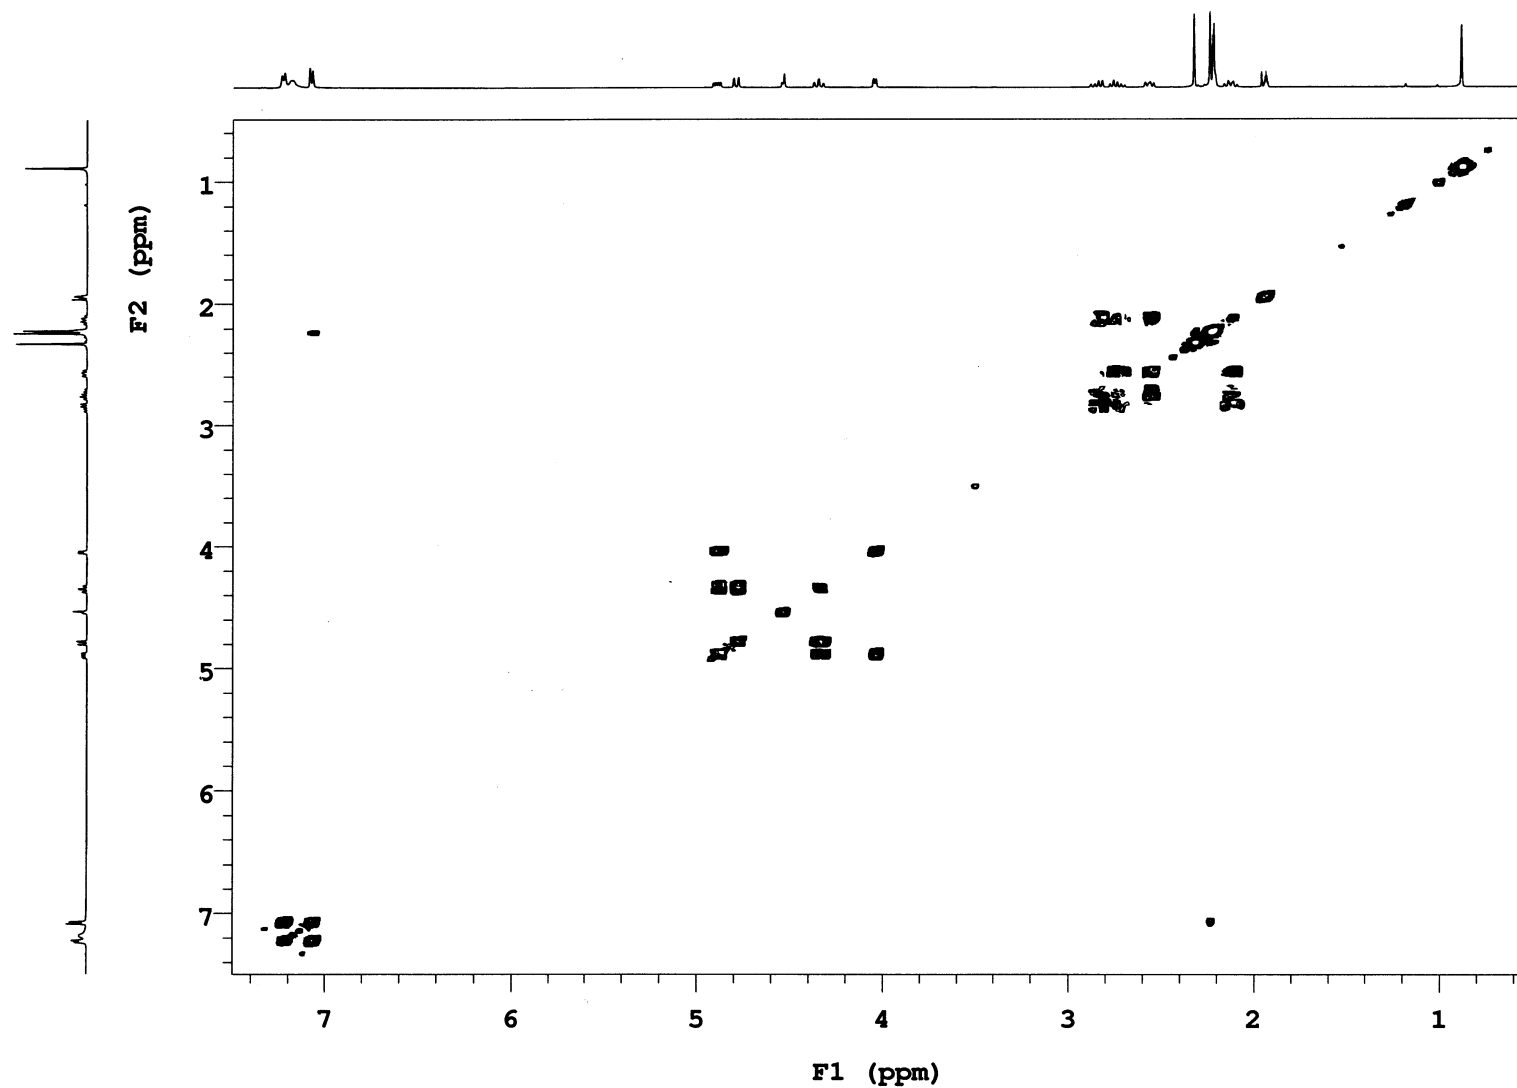



Fig S45. NOESY of compound 3b.

CHP-8b

Sample Name **CHP-8b**  
Date collected **2016-03-25**

Pulse sequence **NOESY**  
Solvent **cd3cn**

Temperature **25**  
Spectrometer **Agilent-NMR-inova500**

Study owner **vnmr2**  
Operator **vnmr2**

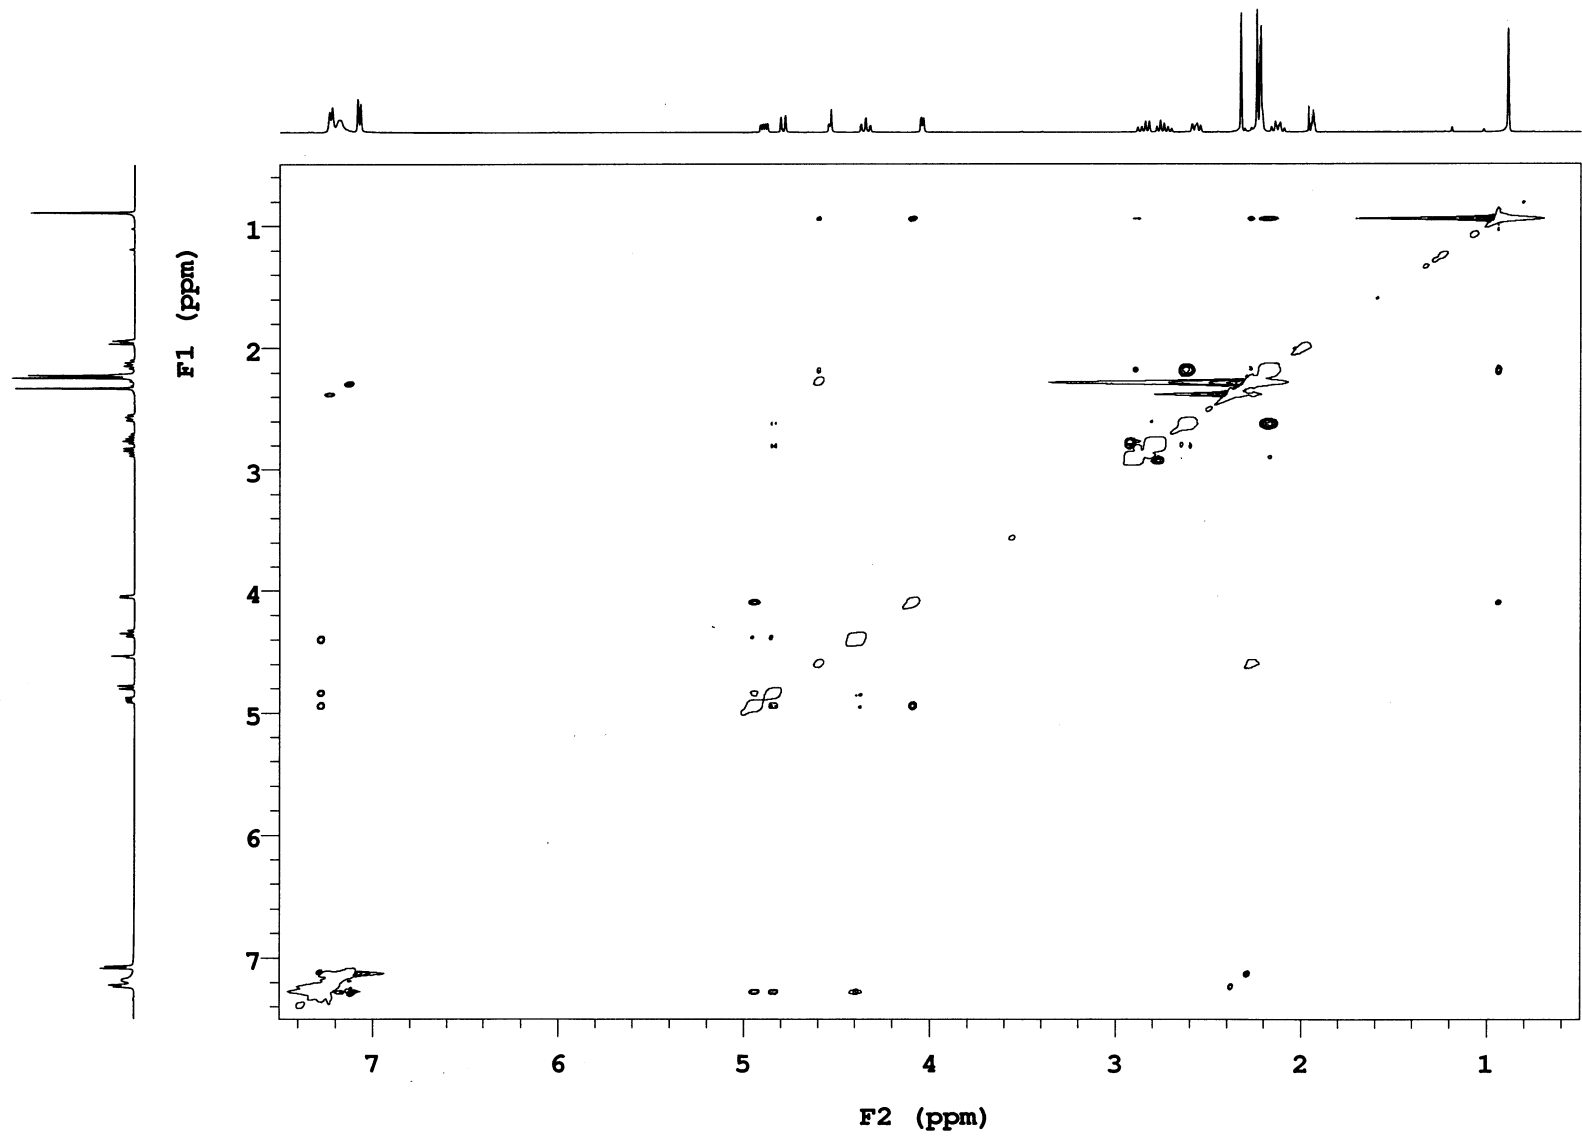

Fig S46. <sup>1</sup>H NMR (CD<sub>3</sub>CN, 500 MHz) of compound 5b.

CHP-8b-12

Sample Name **CHP-8b-12**  
Date collected **2016-05-20**

Pulse sequence **PROTON**  
Solvent **cd3cn**

Temperature **25**  
Spectrometer **Agilent-NMR-inova500**

Study owner **vnmr2**  
Operator **vnmr2**

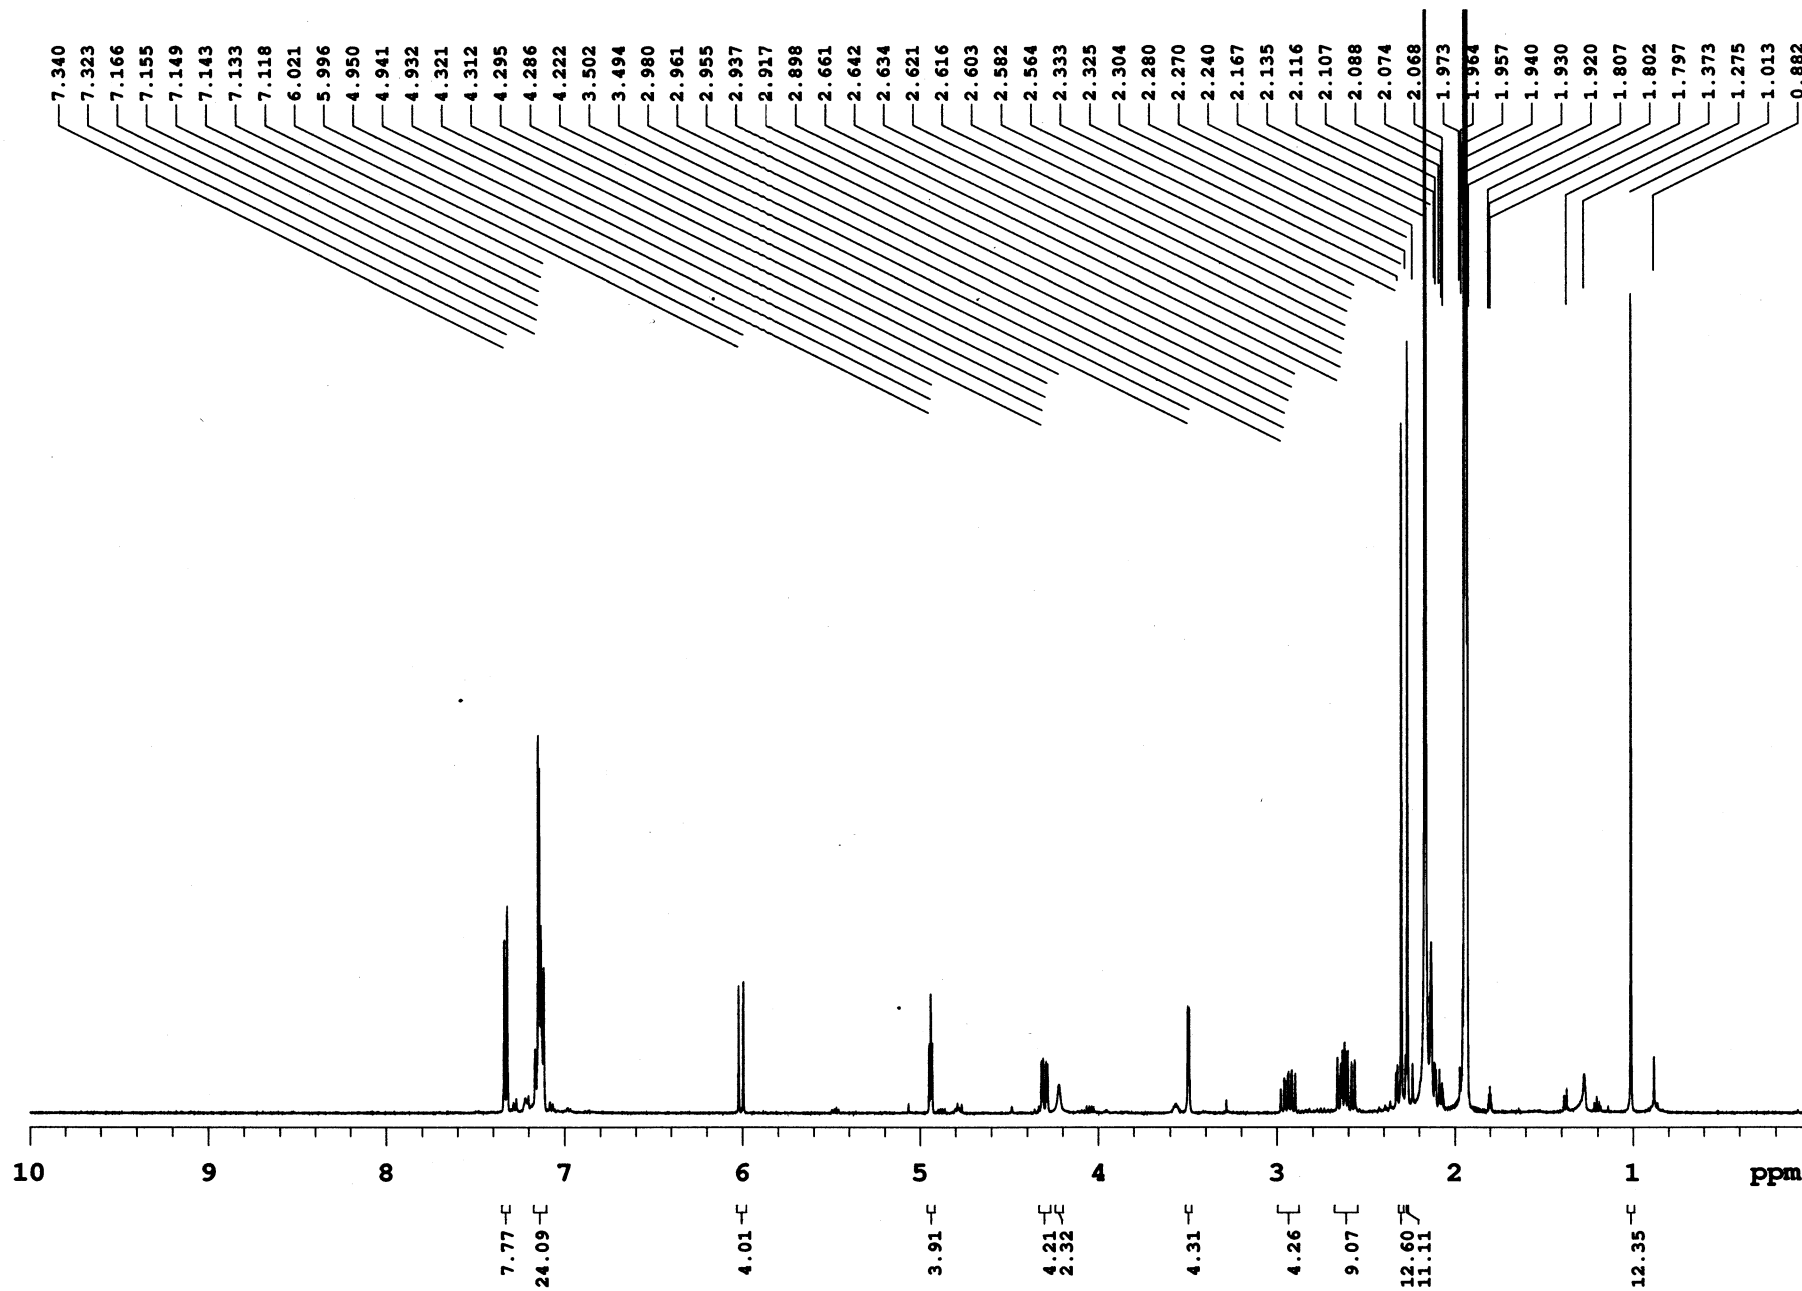

Fig S47. <sup>13</sup>C NMR (CD<sub>3</sub>CN, 125 MHz) of compound 5b.

CHP-8b-f2

Sample Name **CHP-8b-f2**  
Date collected **2016-05-20**

Pulse sequence **CARBON**  
Solvent **cd3cn**

Temperature **25**  
Spectrometer **Agilent-NMR-inova500**

Study owner **vnmr2**  
Operator **vnmr2**

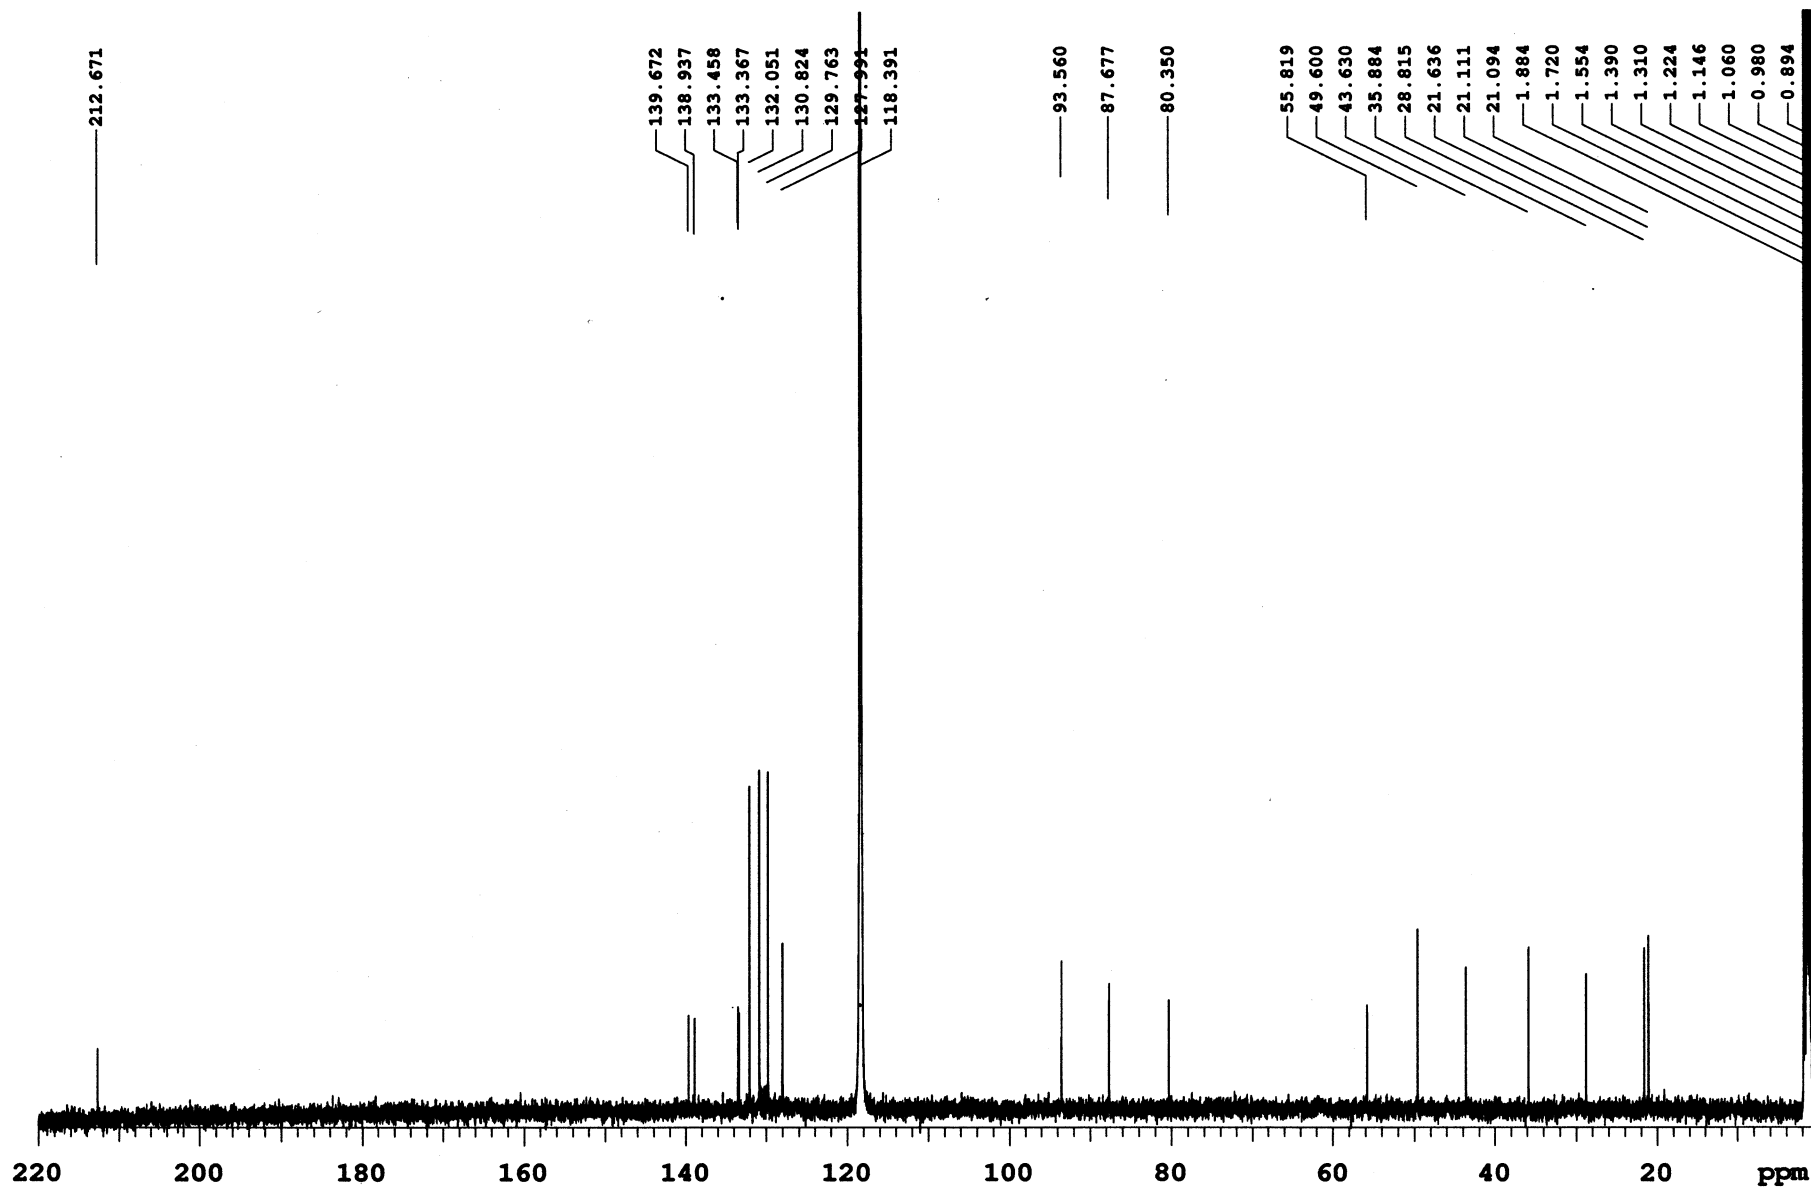

Fig S48. DEPT of compound 5b.

CHP-8b-12

Sample Name **CHP-8b-12**  
Date collected **2016-05-20**

Pulse sequence **DEPT**  
Solvent **cd3cn**

Temperature **25**  
Spectrometer **Agilent-NMR-inova500**

Study owner **vnmr2**  
Operator **vnmr2**

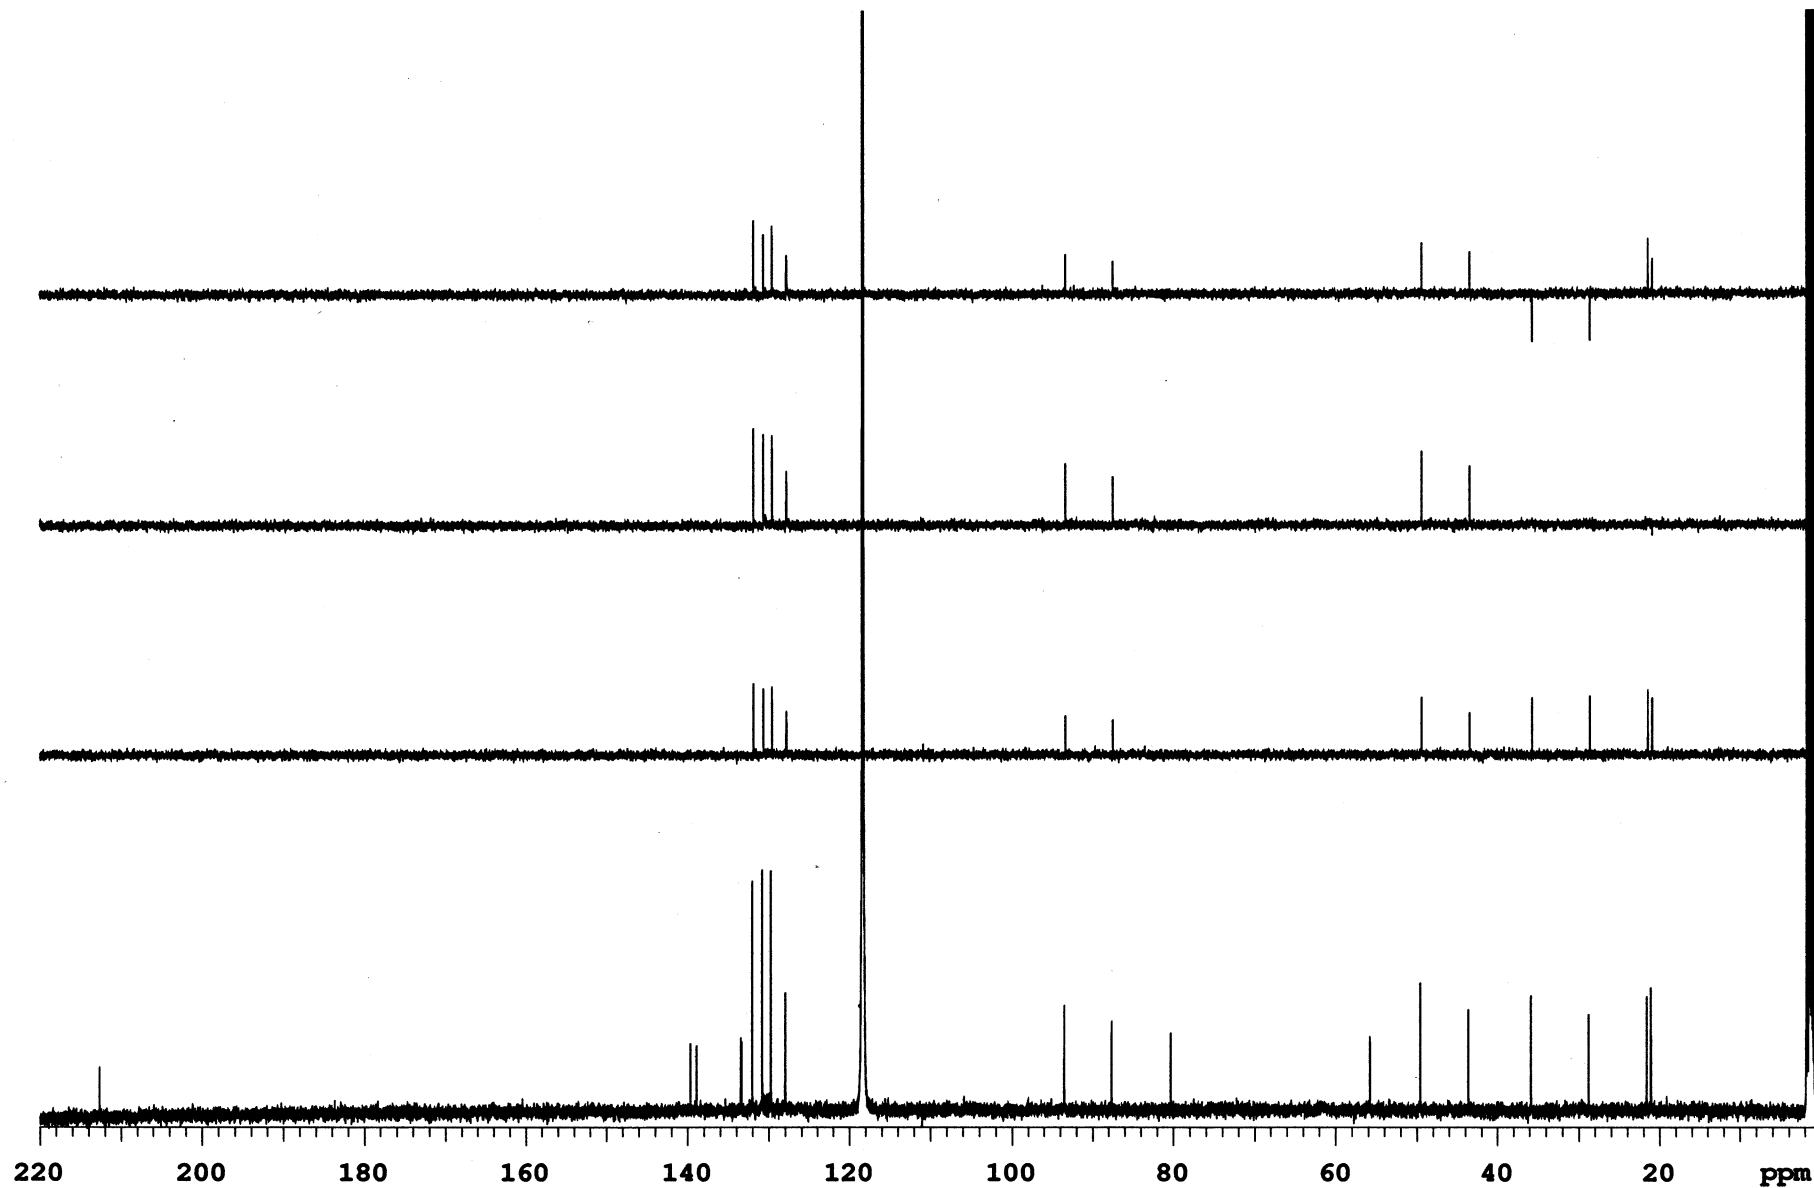

Fig S49. HSQC of compound 5b.

CHP-8b-f2

Sample Name **CHP-8b-f2**  
Date collected **2016-05-20**

Pulse sequence **gHSQC**  
Solvent **cd3cn**

Temperature **25**  
Spectrometer **Agilent-NMR-inova500**

Study owner **vnmr2**  
Operator **vnmr2**

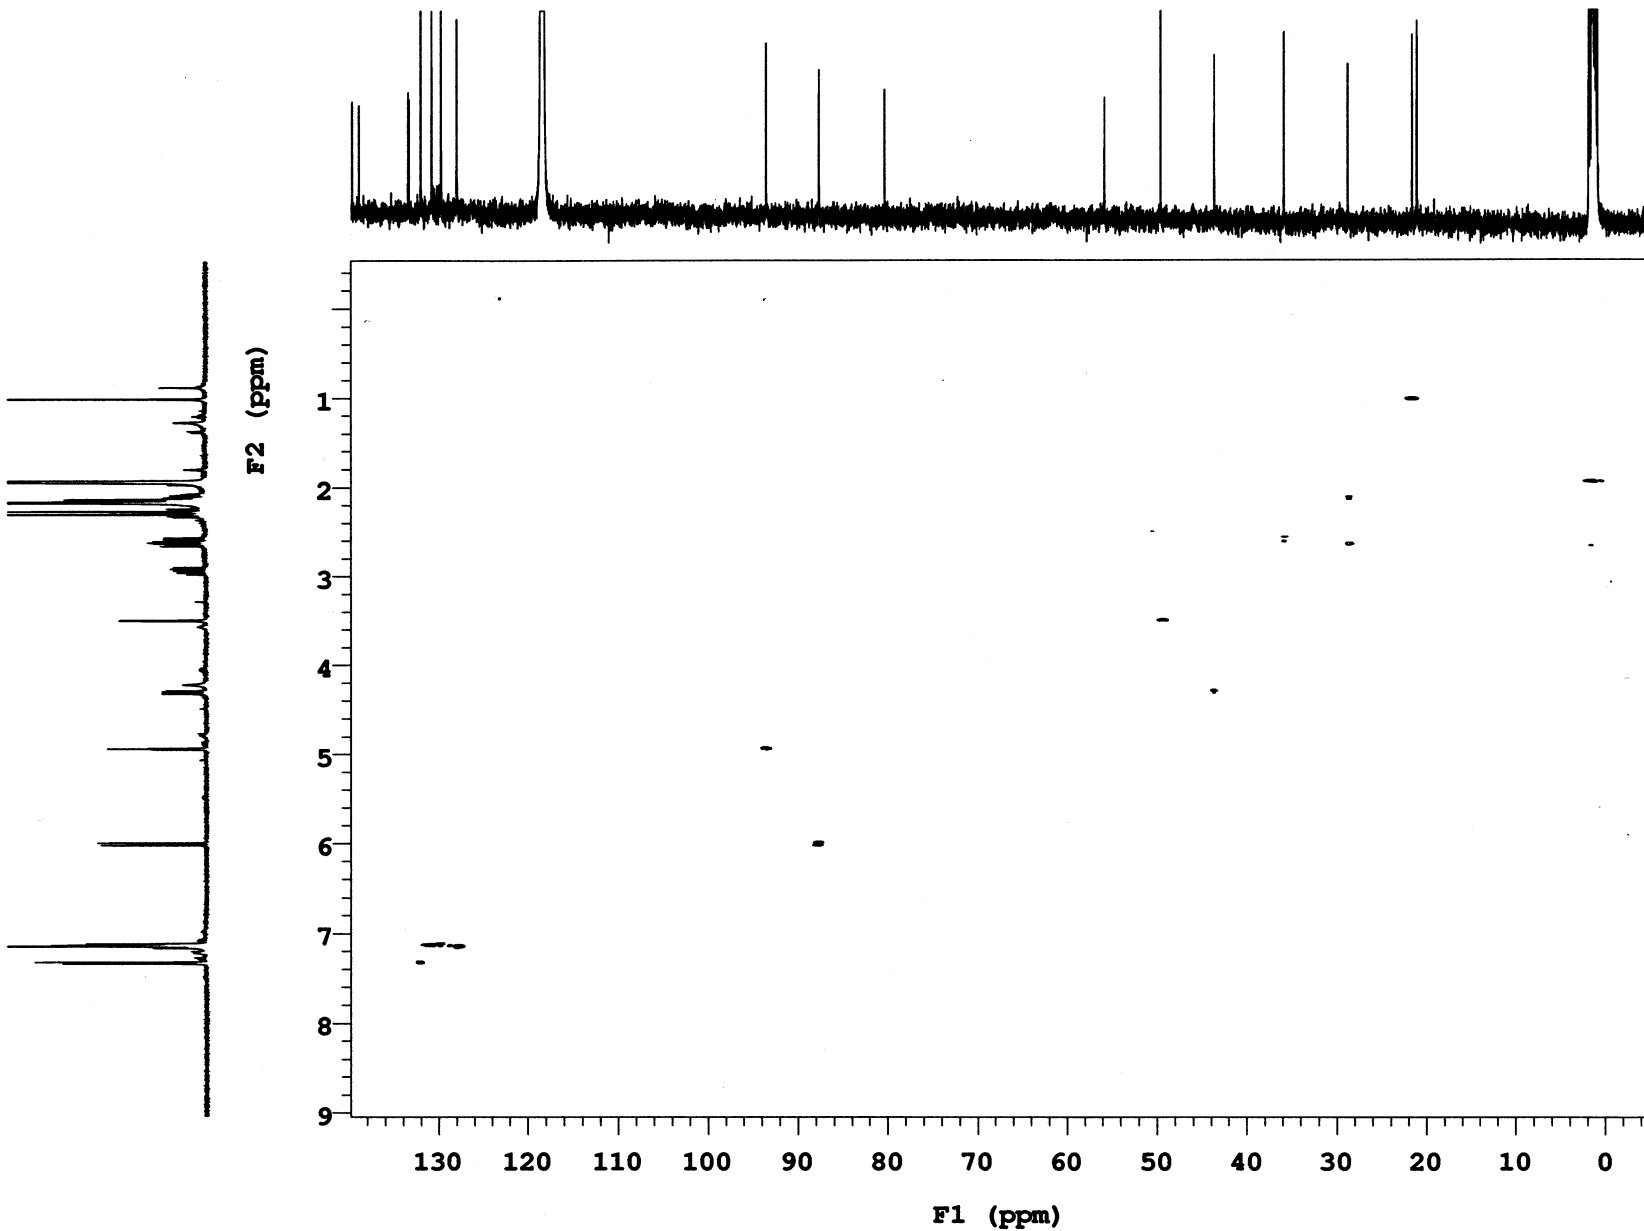

Fig S50. COSY of compound 5b.

CHP-8b-f2

Sample Name **CHP-8b-f2**  
Date collected **2016-05-20**

Pulse sequence **gCOSY**  
Solvent **cd3cn**

Temperature **25**  
Spectrometer **Agilent-NMR-inova500**

Study owner **vnmr2**  
Operator **vnmr2**

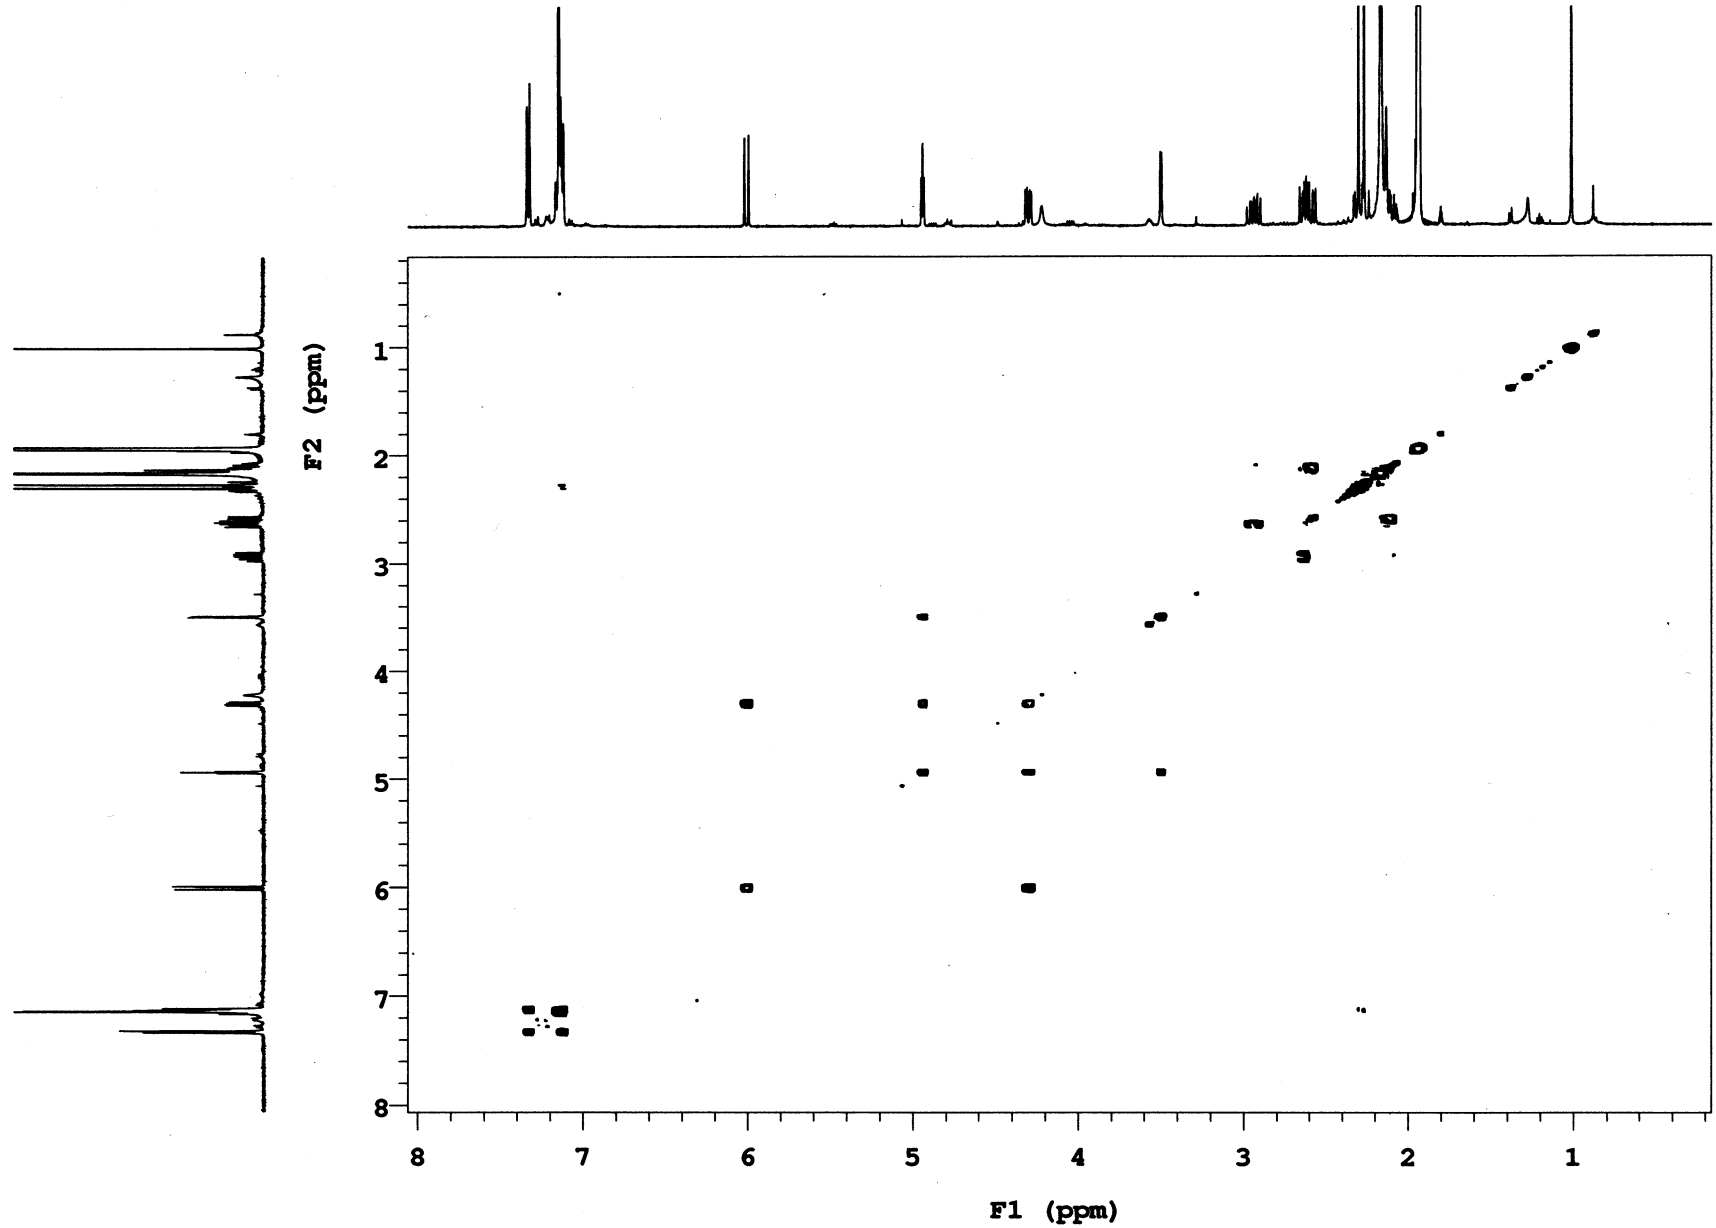

Fig S51. NOESY of compound 5b.

CHP-8b-12

Sample Name **CHP-8b-12**  
Date collected **2016-05-20**

Pulse sequence **NOESY**  
Solvent **cd3cn**

Temperature **25**  
Spectrometer **Agilent-NMR-inova500**

Study owner **vnmr2**  
Operator **vnmr2**

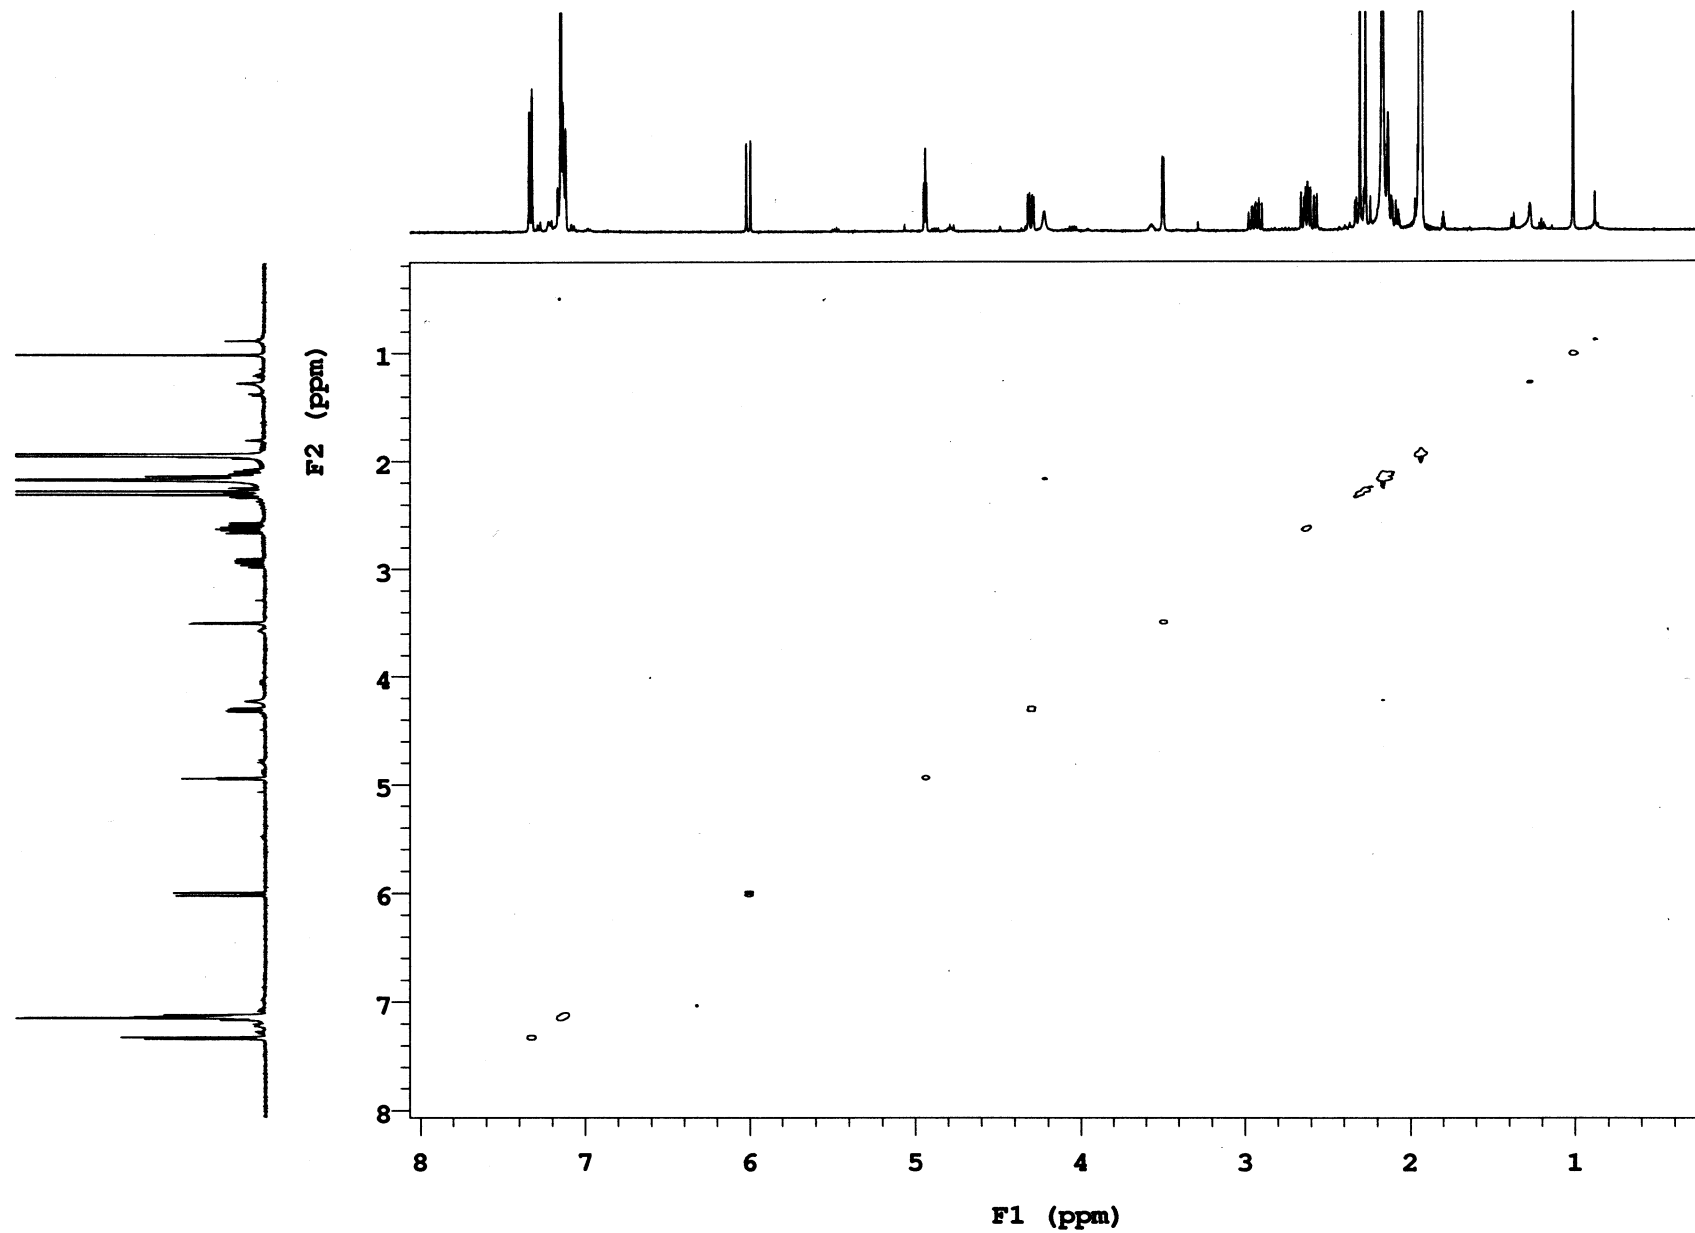

Fig S52. <sup>1</sup>H NMR (CDCl<sub>3</sub>, 500 MHz) of compound 3c.

CHP-8C

|                |            |                |        |              |                      |             |       |
|----------------|------------|----------------|--------|--------------|----------------------|-------------|-------|
| Sample Name    | CHP-8C     | Pulse sequence | PROTON | Temperature  | 25                   | Study owner | vnmr2 |
| Date collected | 2016-03-26 | Solvent        | cdcl3  | Spectrometer | Agilent-NMR-inova500 | Operator    | vnmr2 |

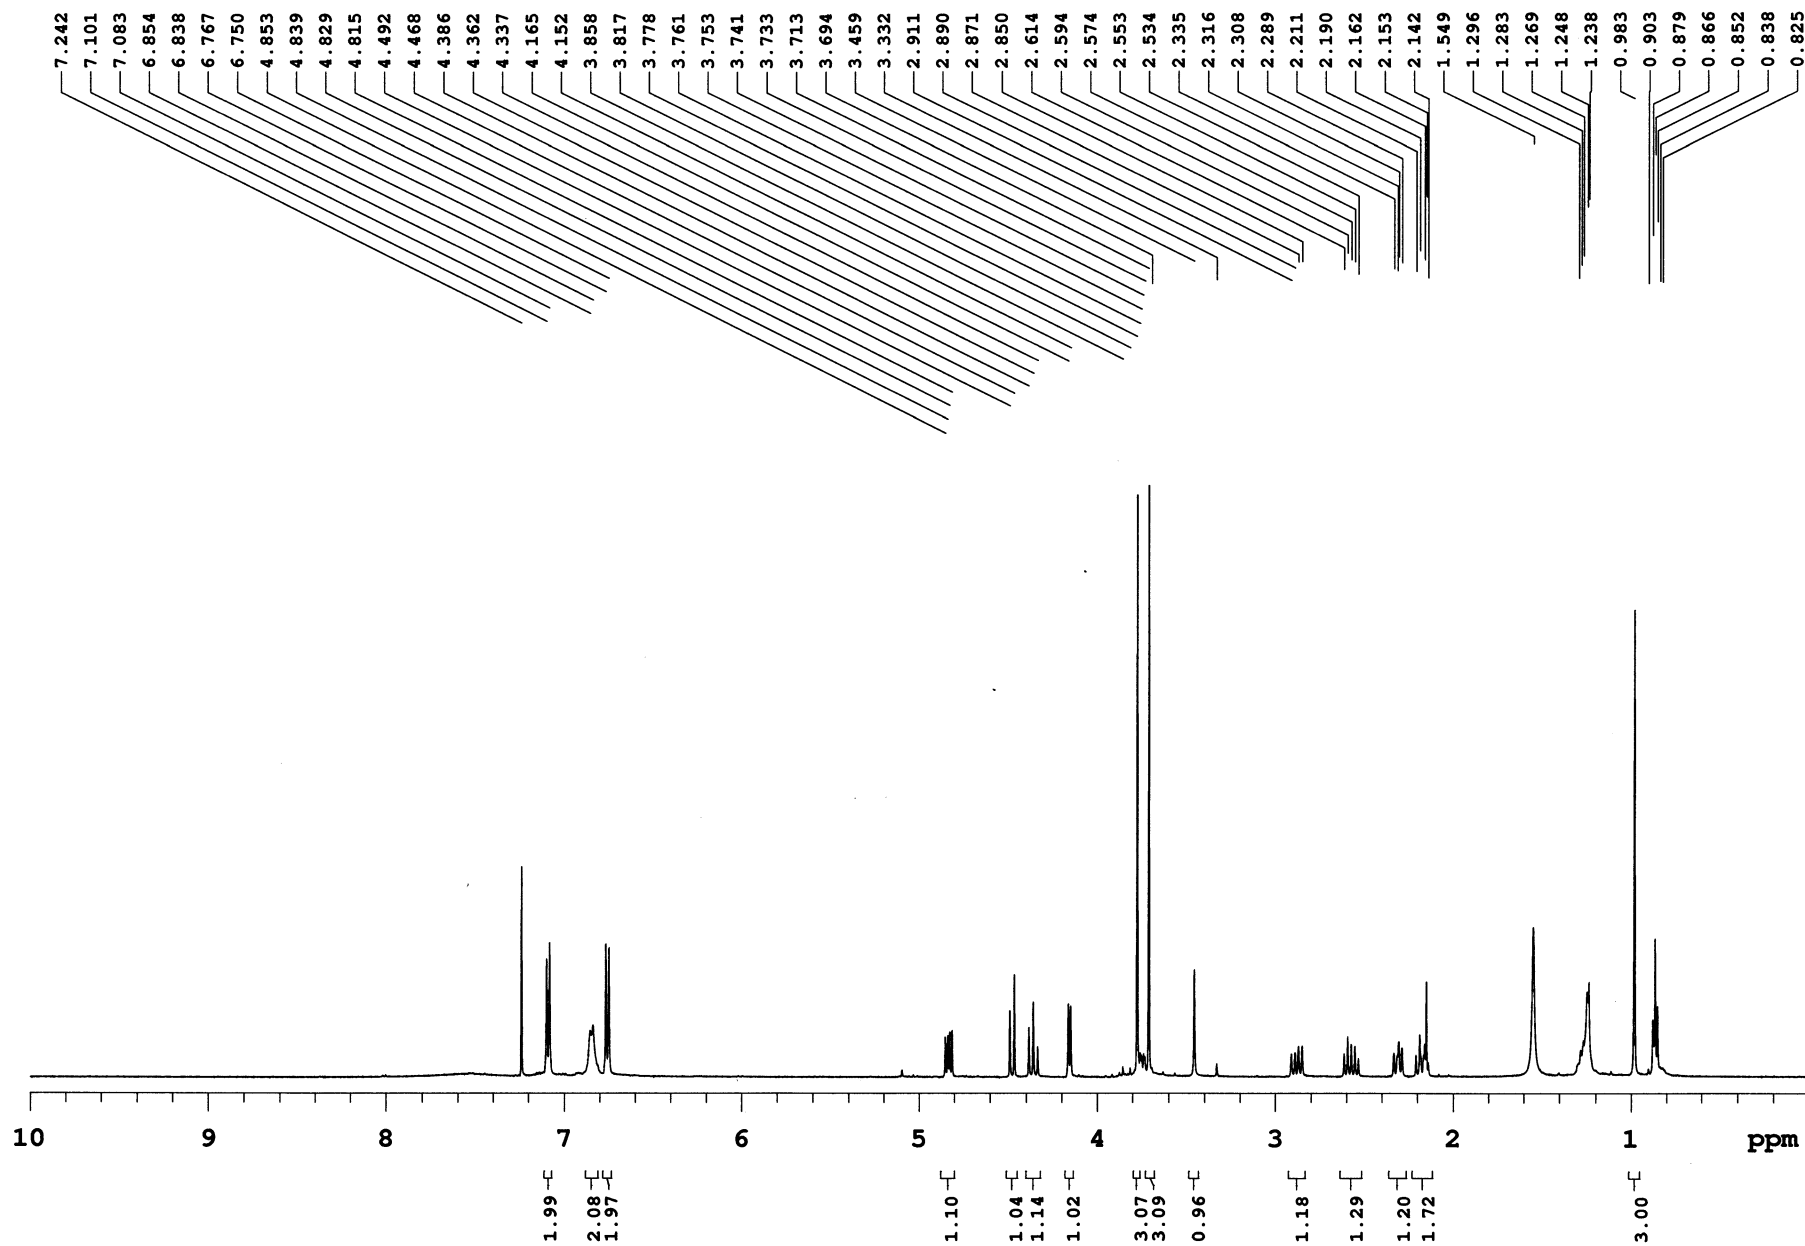



Fig S53. <sup>13</sup>C NMR (CDCl<sub>3</sub>, 125 MHz) of compound 3c.

CHP-8C

Sample Name **CHP-8C**  
Date collected **2016-03-26**

Pulse sequence **CARBON**  
Solvent **cdcl3**

Temperature **25**  
Spectrometer **Agilent-NMR-inova500**

Study owner **vnmr2**  
Operator **vnmr2**

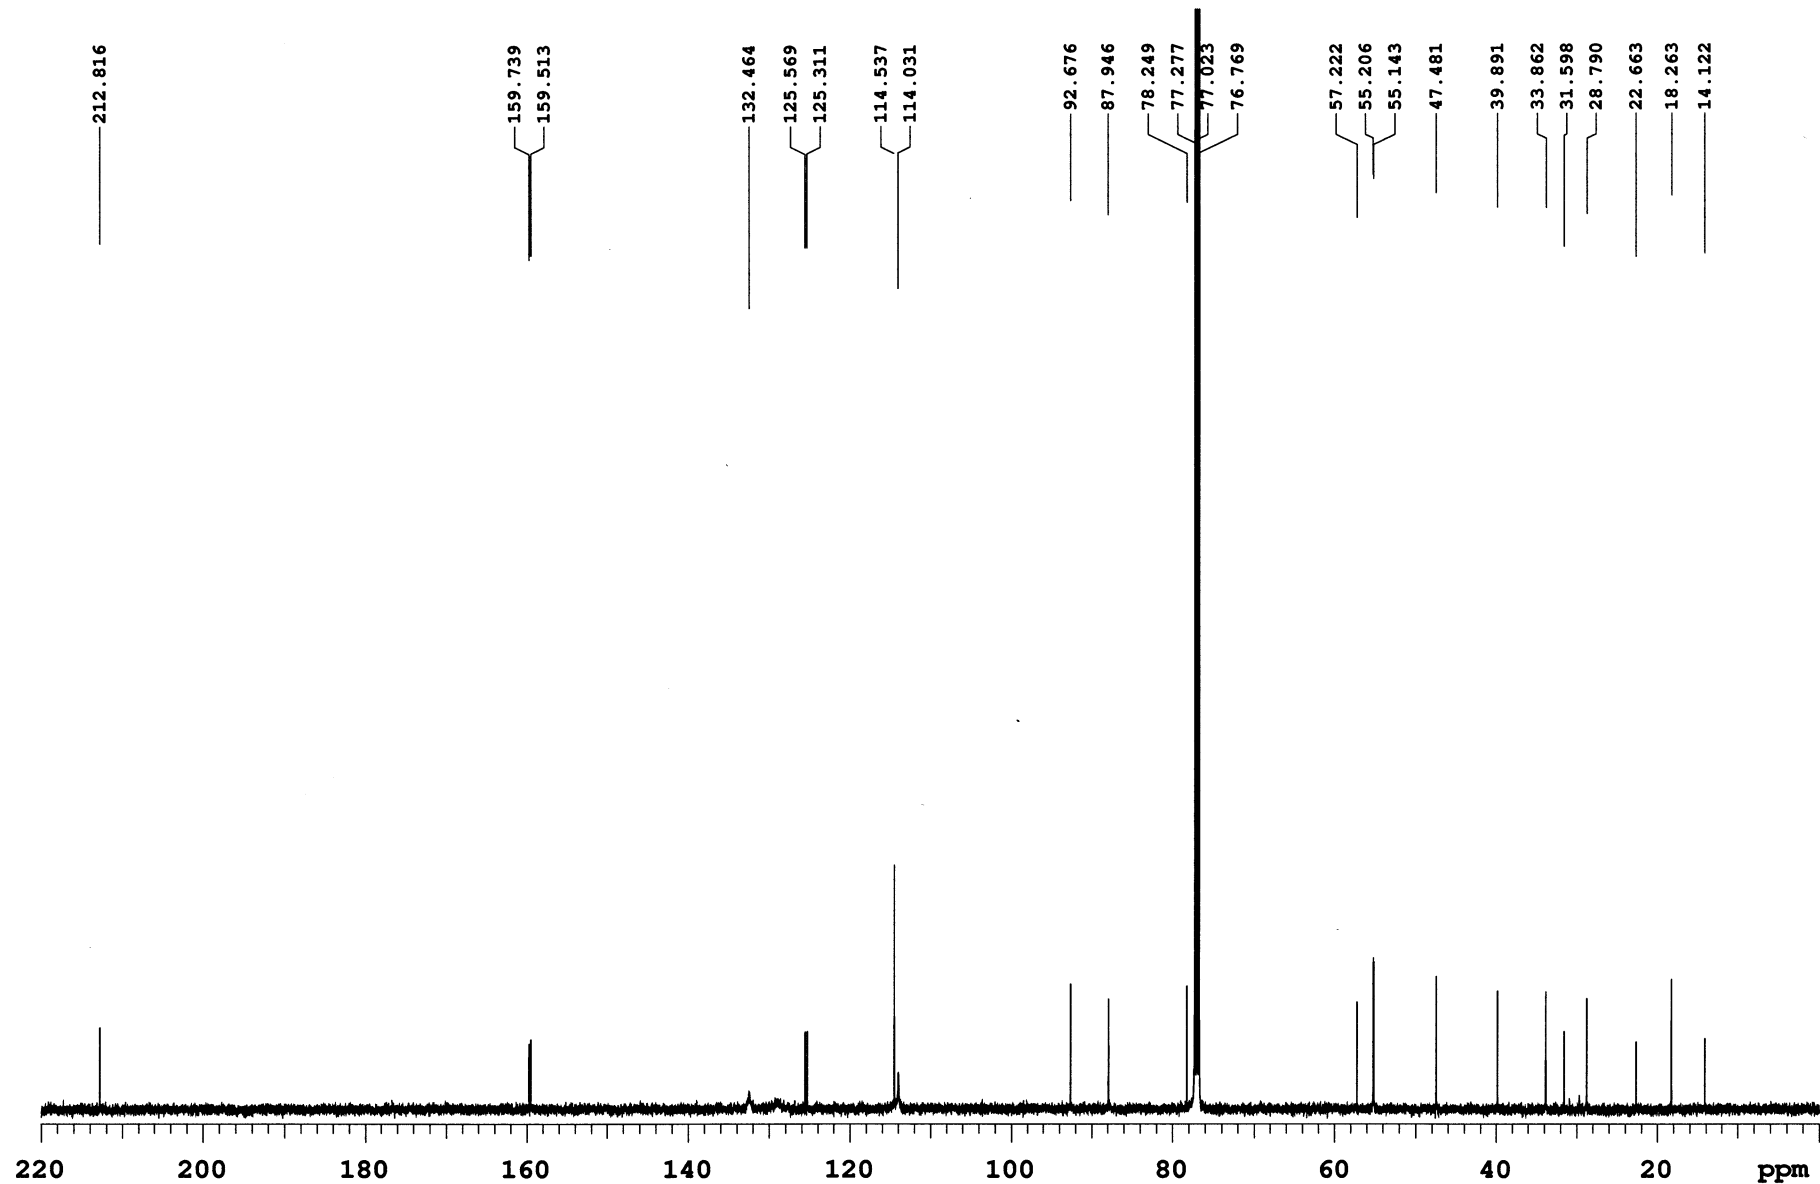

Fig S54. DEPT of compound 3c.

CHP-8C

Sample Name **CHP-8C**  
Date collected **2016-03-26**

Pulse sequence **DEPT**  
Solvent **cdcl3**

Temperature **25**  
Spectrometer **Agilent-NMR-inova500**

Study owner **vnmr2**  
Operator **vnmr2**

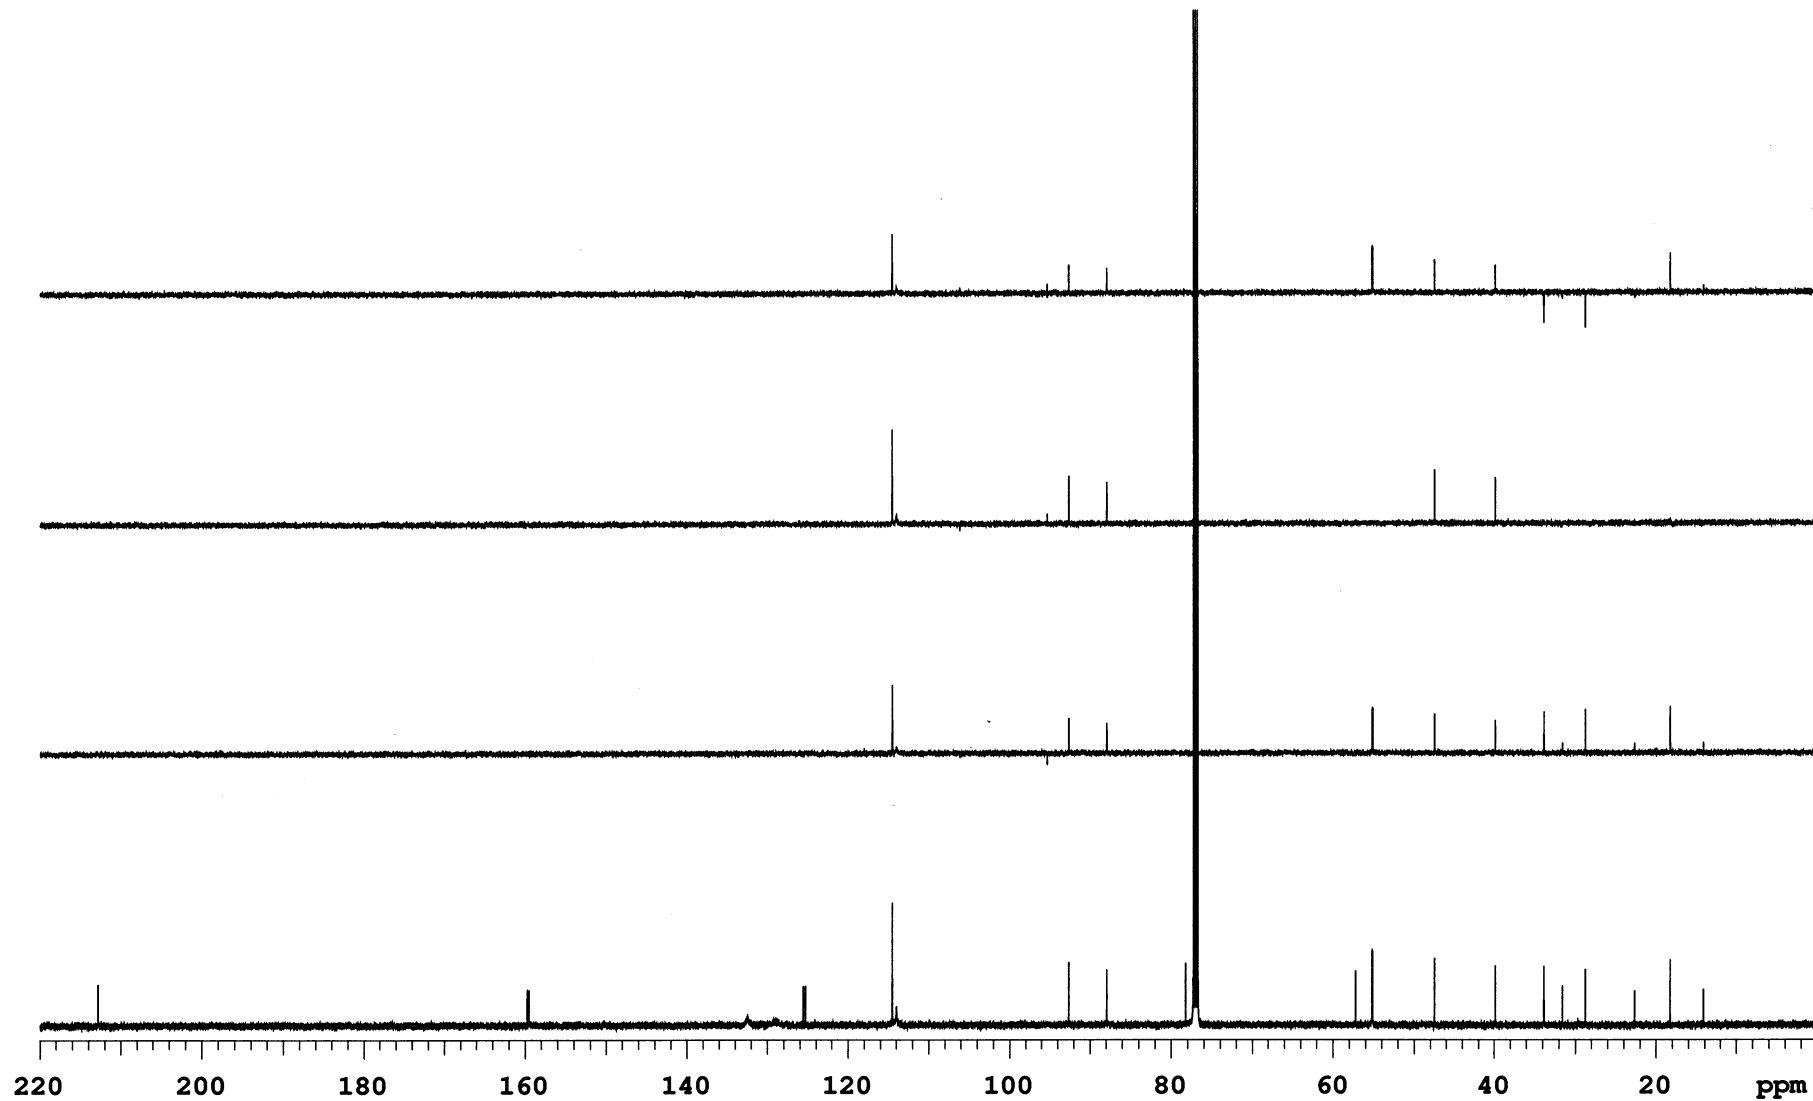

Fig S55. HSQC of compound 3c.

CHP-8C

Sample Name **CHP-8C**  
Date collected **2016-03-26**

Pulse sequence **gHSQC**  
Solvent **cdcl3**

Temperature **25**  
Spectrometer **Agilent-NMR-inova500**

Study owner **vnmr2**  
Operator **vnmr2**

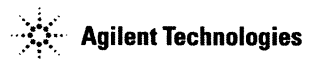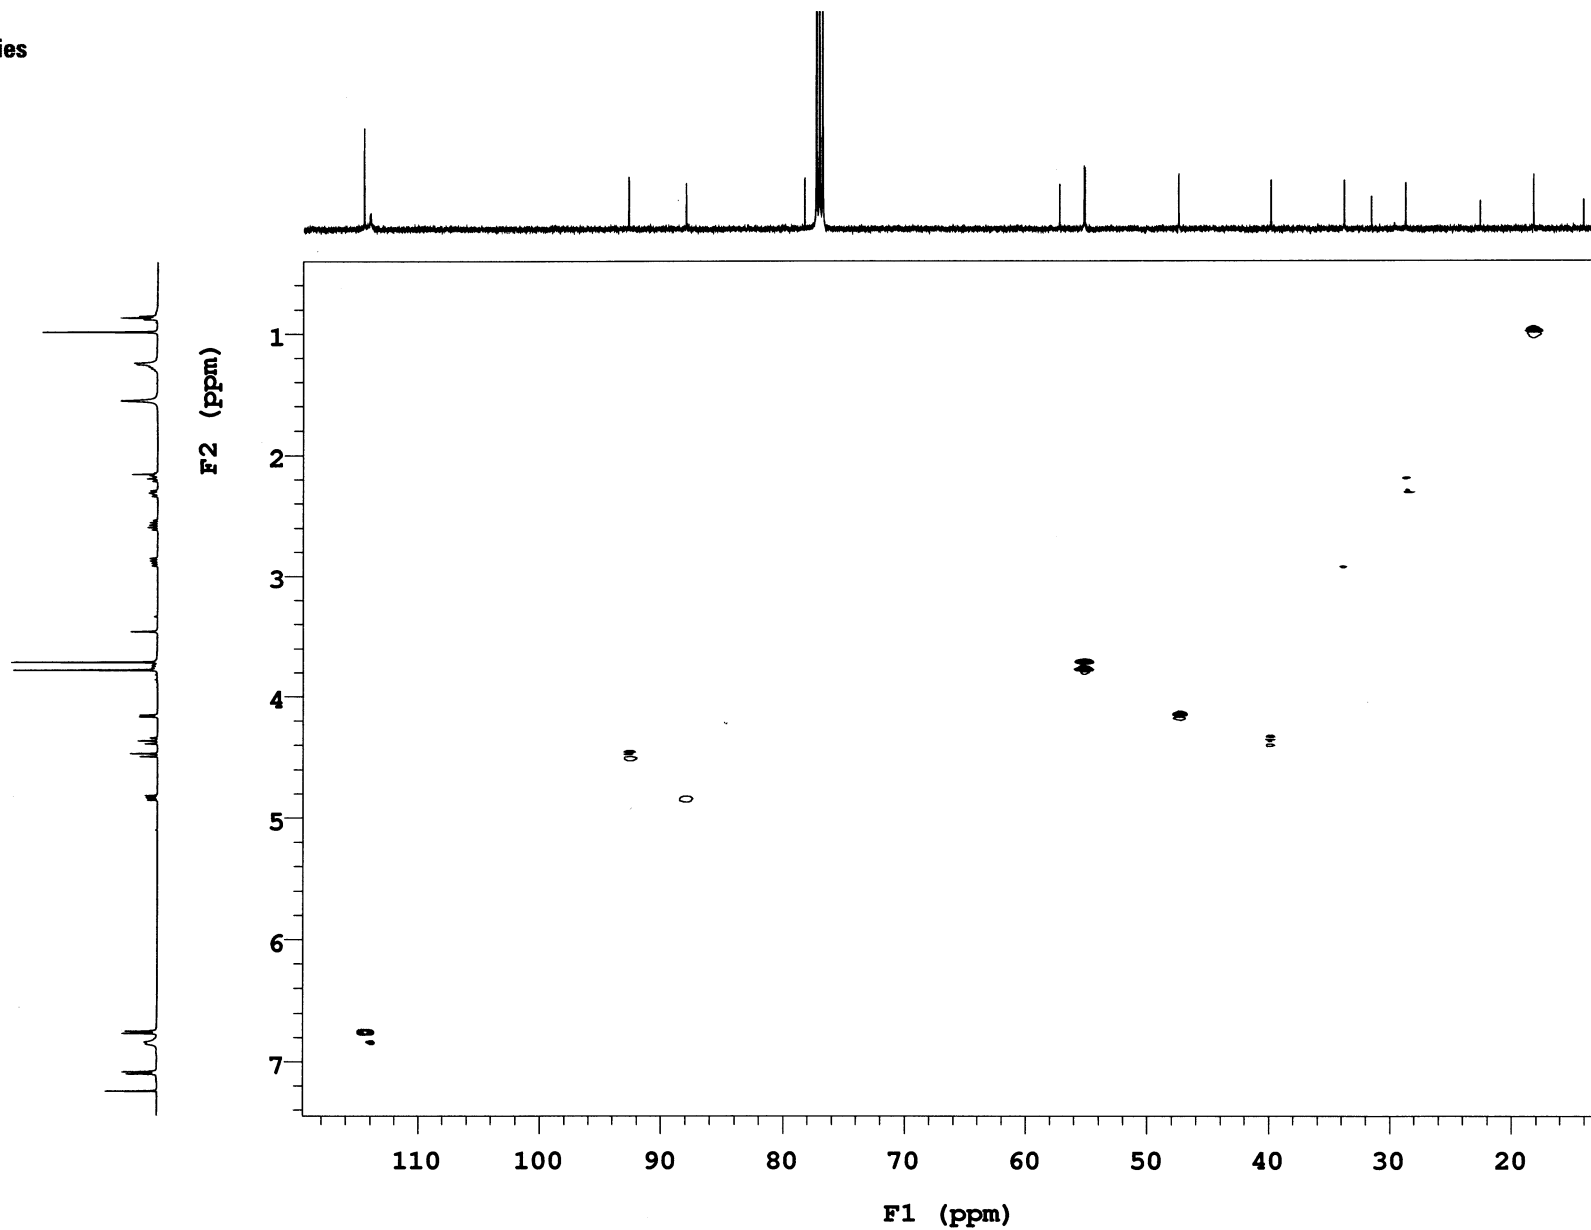

Fig S56. COSY of compound 3c.

CHP-8C

Sample Name **CHP-8C**  
Date collected **2016-03-26**

Pulse sequence **gCOSY**  
Solvent **cdcl3**

Temperature **25**  
Spectrometer **Agilent-NMR-inova500**

Study owner **vnmr2**  
Operator **vnmr2**

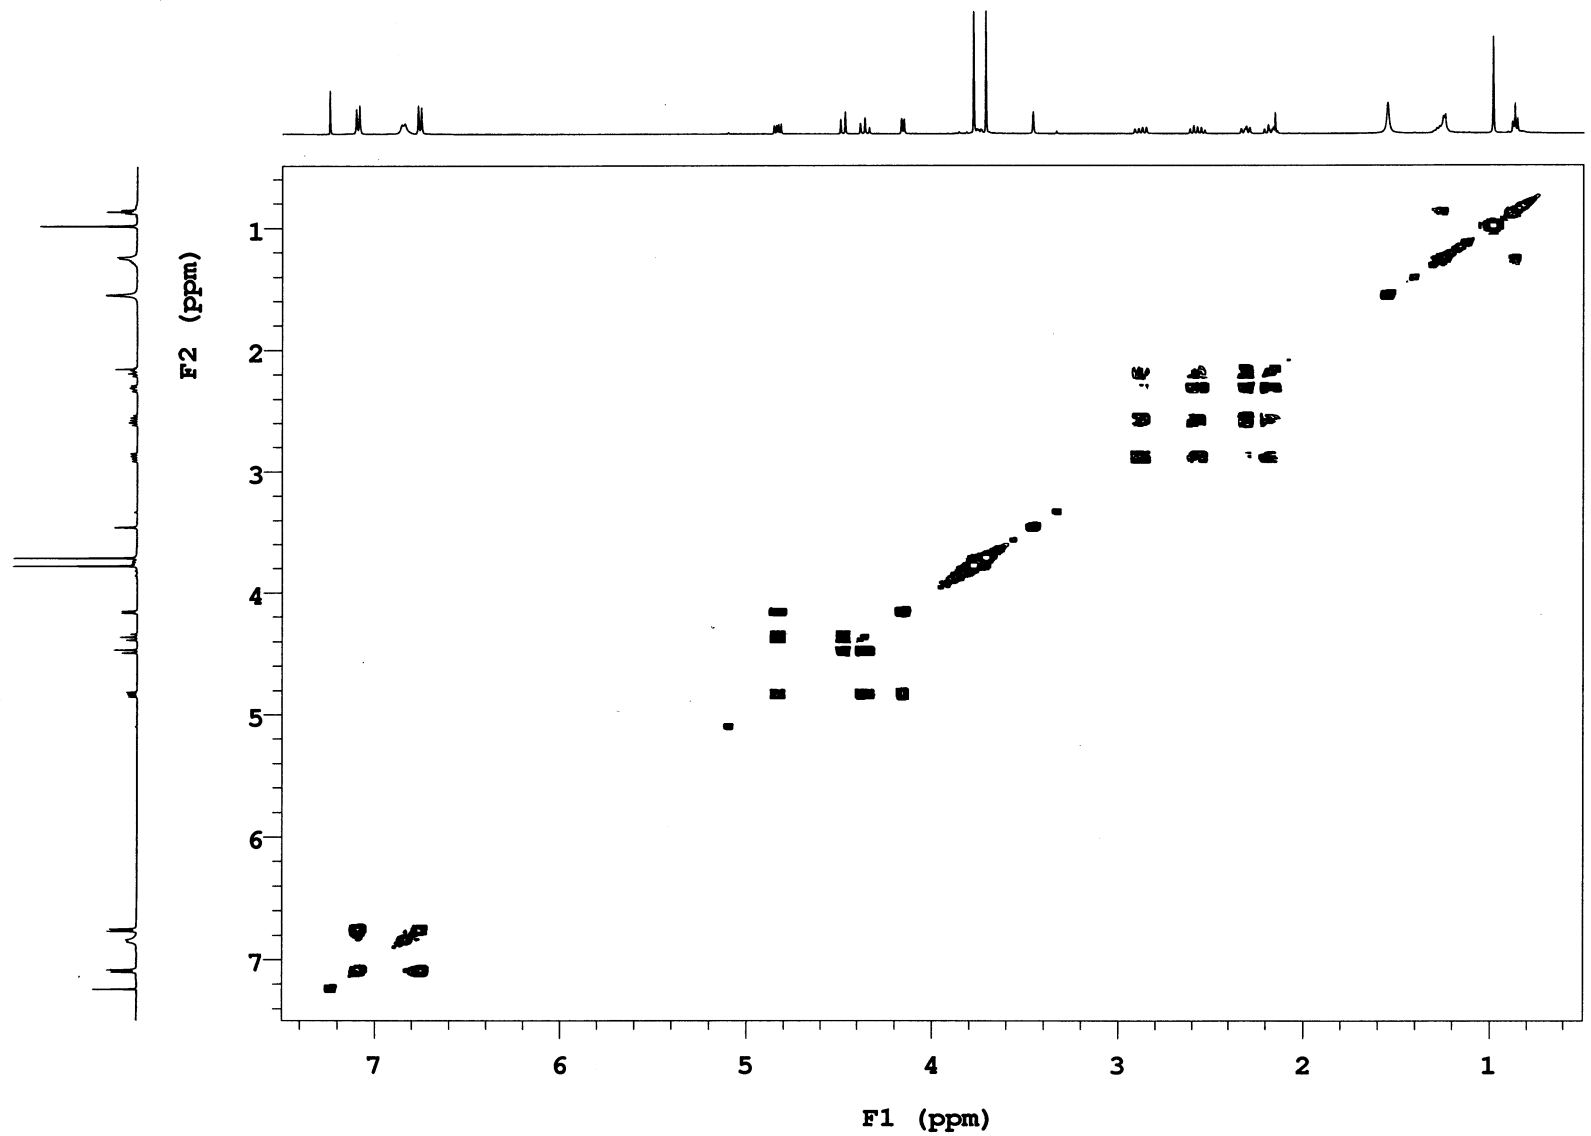

Fig S57. NOESY of compound 3c.

CHP-8C

Sample Name **CHP-8C**  
Date collected **2016-03-26**

Pulse sequence **NOESY**  
Solvent **cdcl3**

Temperature **25**  
Spectrometer **Agilent-NMR-inova500**

Study owner **vnmr2**  
Operator **vnmr2**

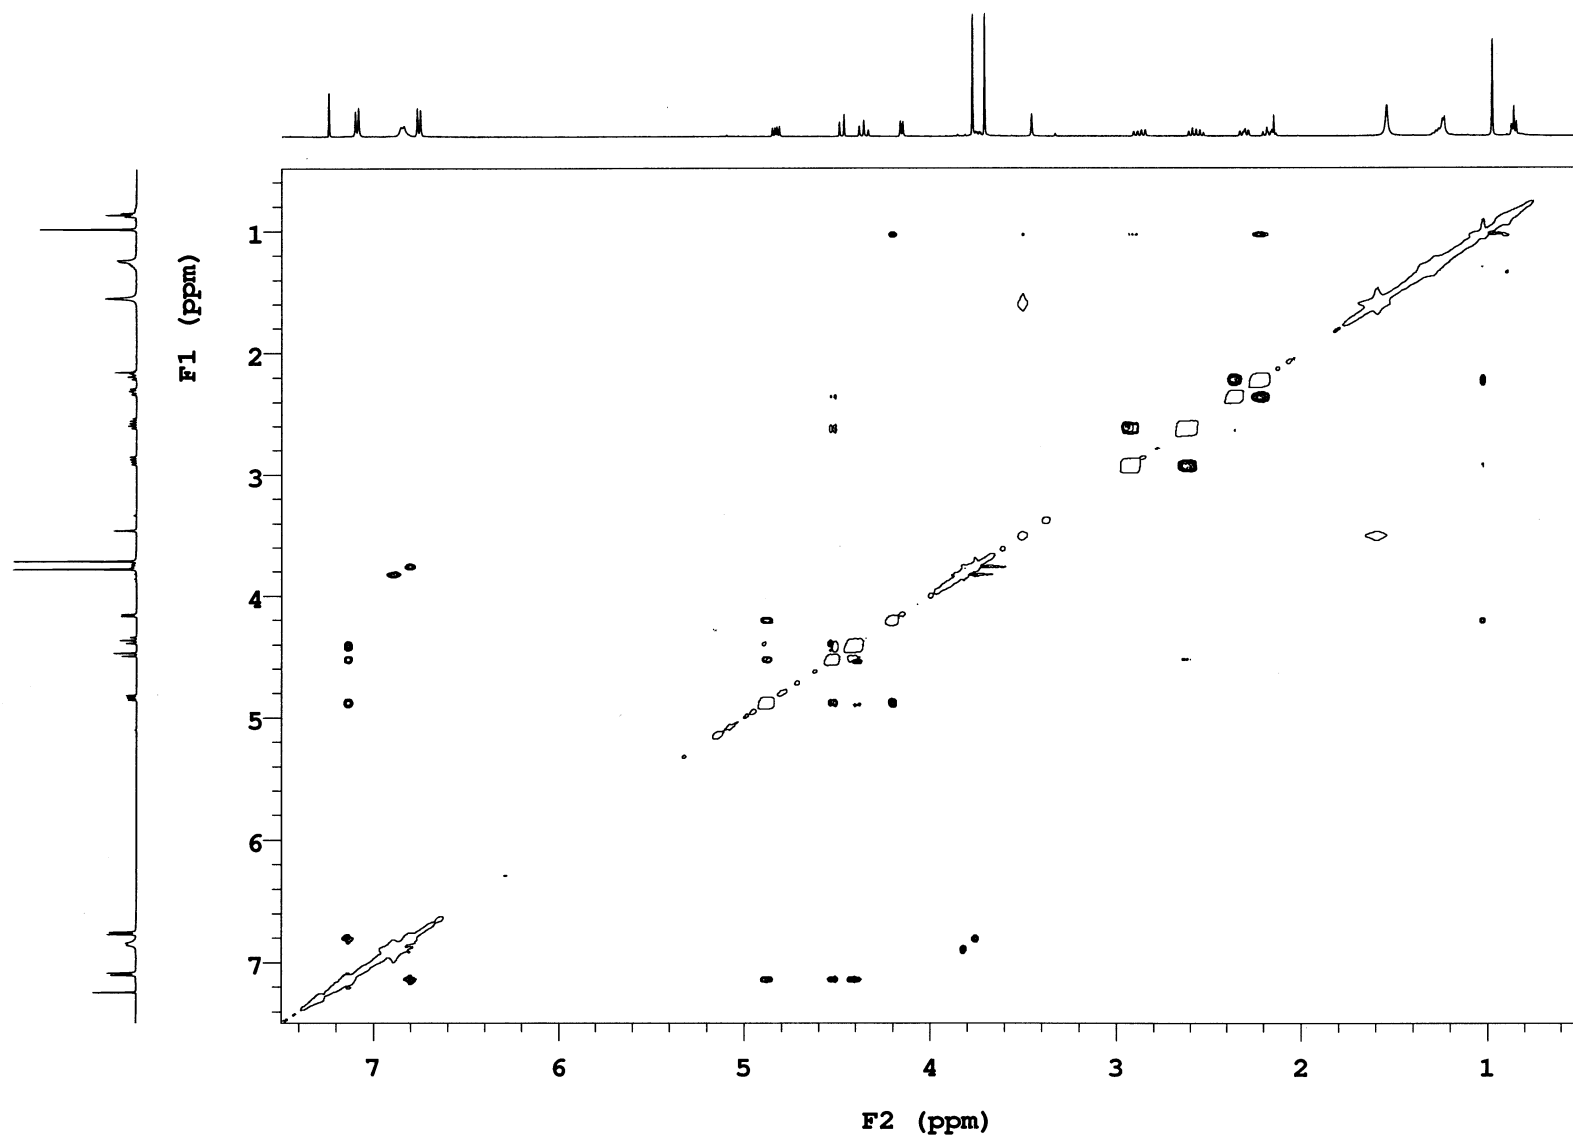

Fig S58. <sup>1</sup>H NMR (CDCl<sub>3</sub>, 500 MHz) of compound 5c.

CHP-8c-f2

|                |            |                |        |              |                      |             |       |
|----------------|------------|----------------|--------|--------------|----------------------|-------------|-------|
| Sample Name    | CHP-8c-f2  | Pulse sequence | PROTON | Temperature  | 25                   | Study owner | vnmr2 |
| Date collected | 2016-05-28 | Solvent        | cdcl3  | Spectrometer | Agilent-NMR-inova500 | Operator    | vnmr2 |

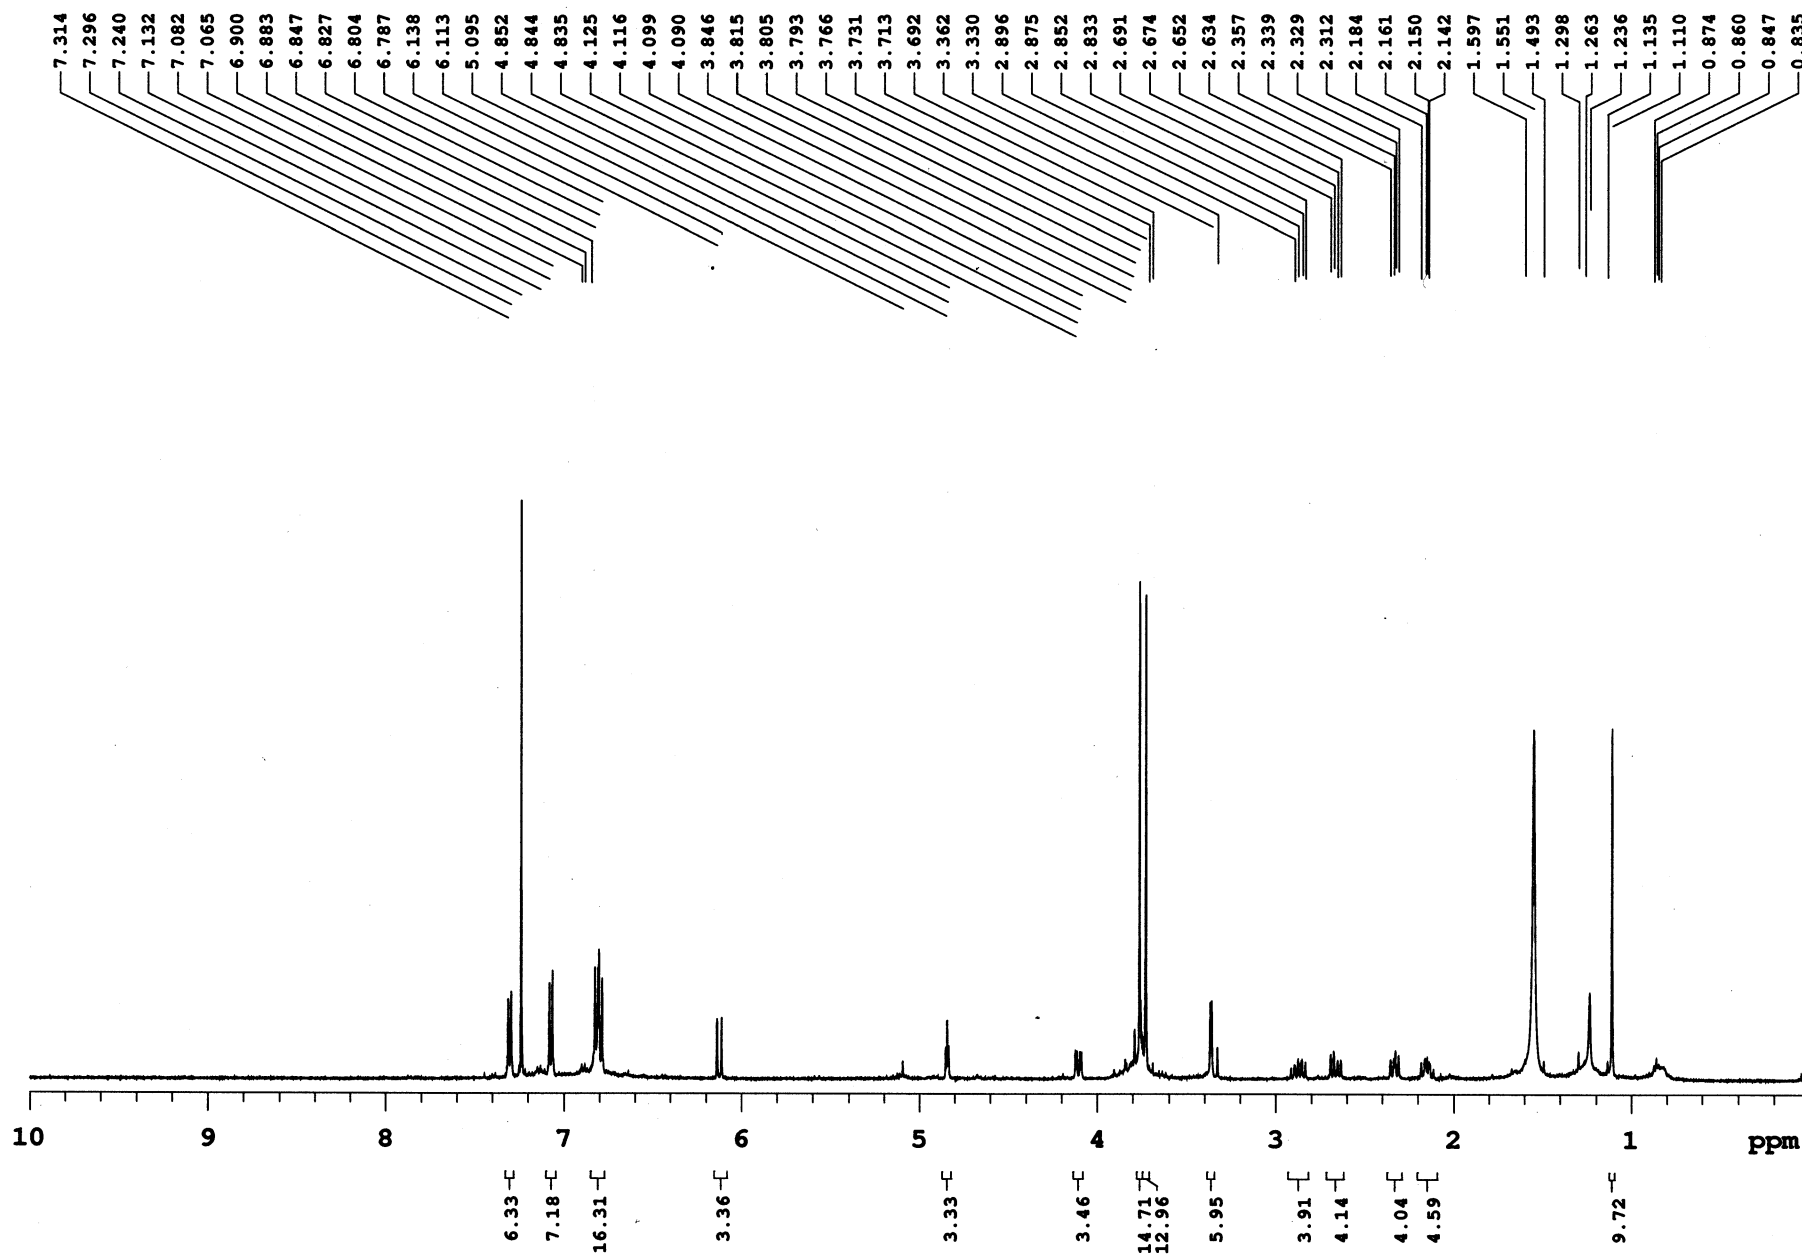

Fig S59. <sup>13</sup>C NMR (CDCl<sub>3</sub>, 125 MHz) of compound 5c.

CHP-8c-f2

|                |            |                |        |              |                      |             |       |
|----------------|------------|----------------|--------|--------------|----------------------|-------------|-------|
| Sample Name    | CHP-8c-f2  | Pulse sequence | CARBON | Temperature  | 25                   | Study owner | vnmr2 |
| Date collected | 2016-05-28 | Solvent        | cdcl3  | Spectrometer | Agilent-NMR-inova500 | Operator    | vnmr2 |

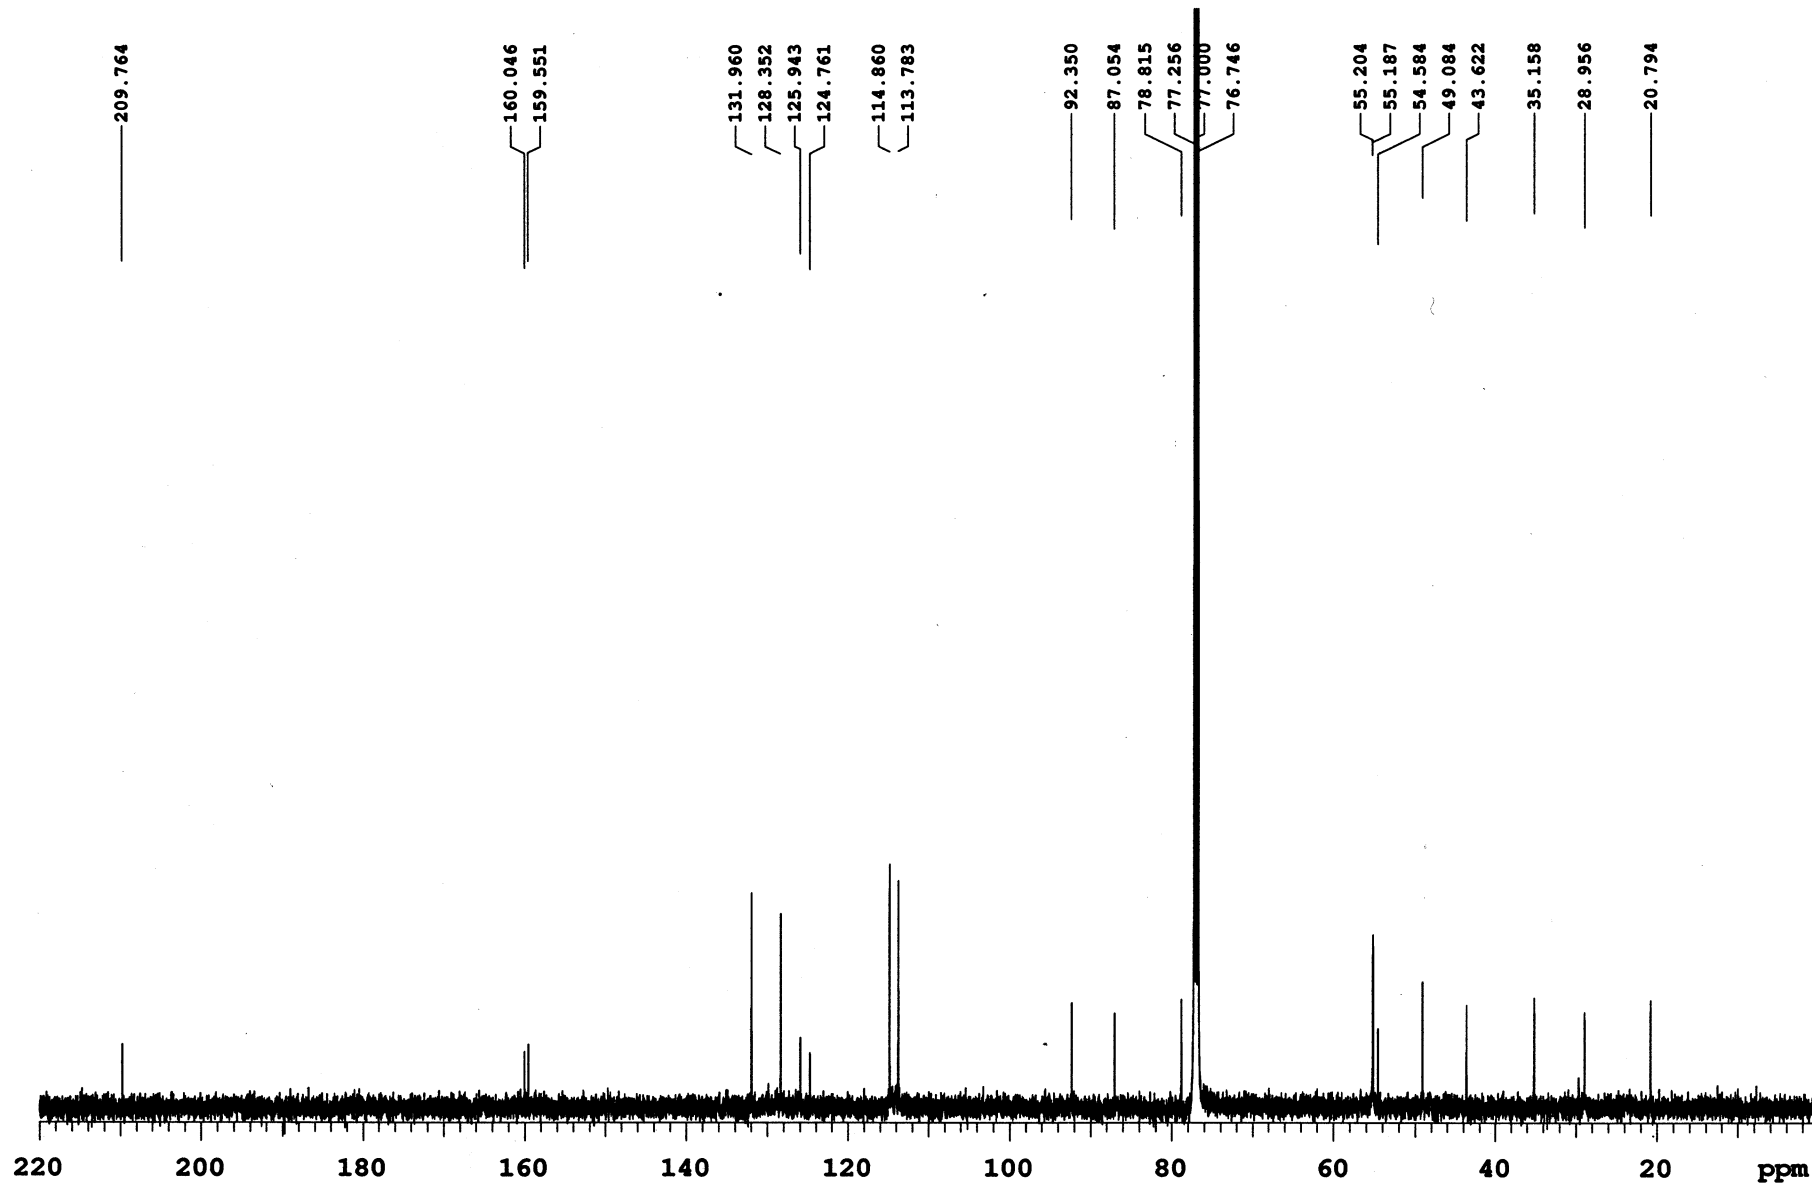

Fig S60. DEPT of compound 5c.

CHP-8c-f2

Sample Name **CHP-8c-f2**  
Date collected **2016-05-28**

Pulse sequence **DEPT**  
Solvent **cdcl3**

Temperature **25**  
Spectrometer **Agilent-NMR-inova500**

Study owner **vnmr2**  
Operator **vnmr2**

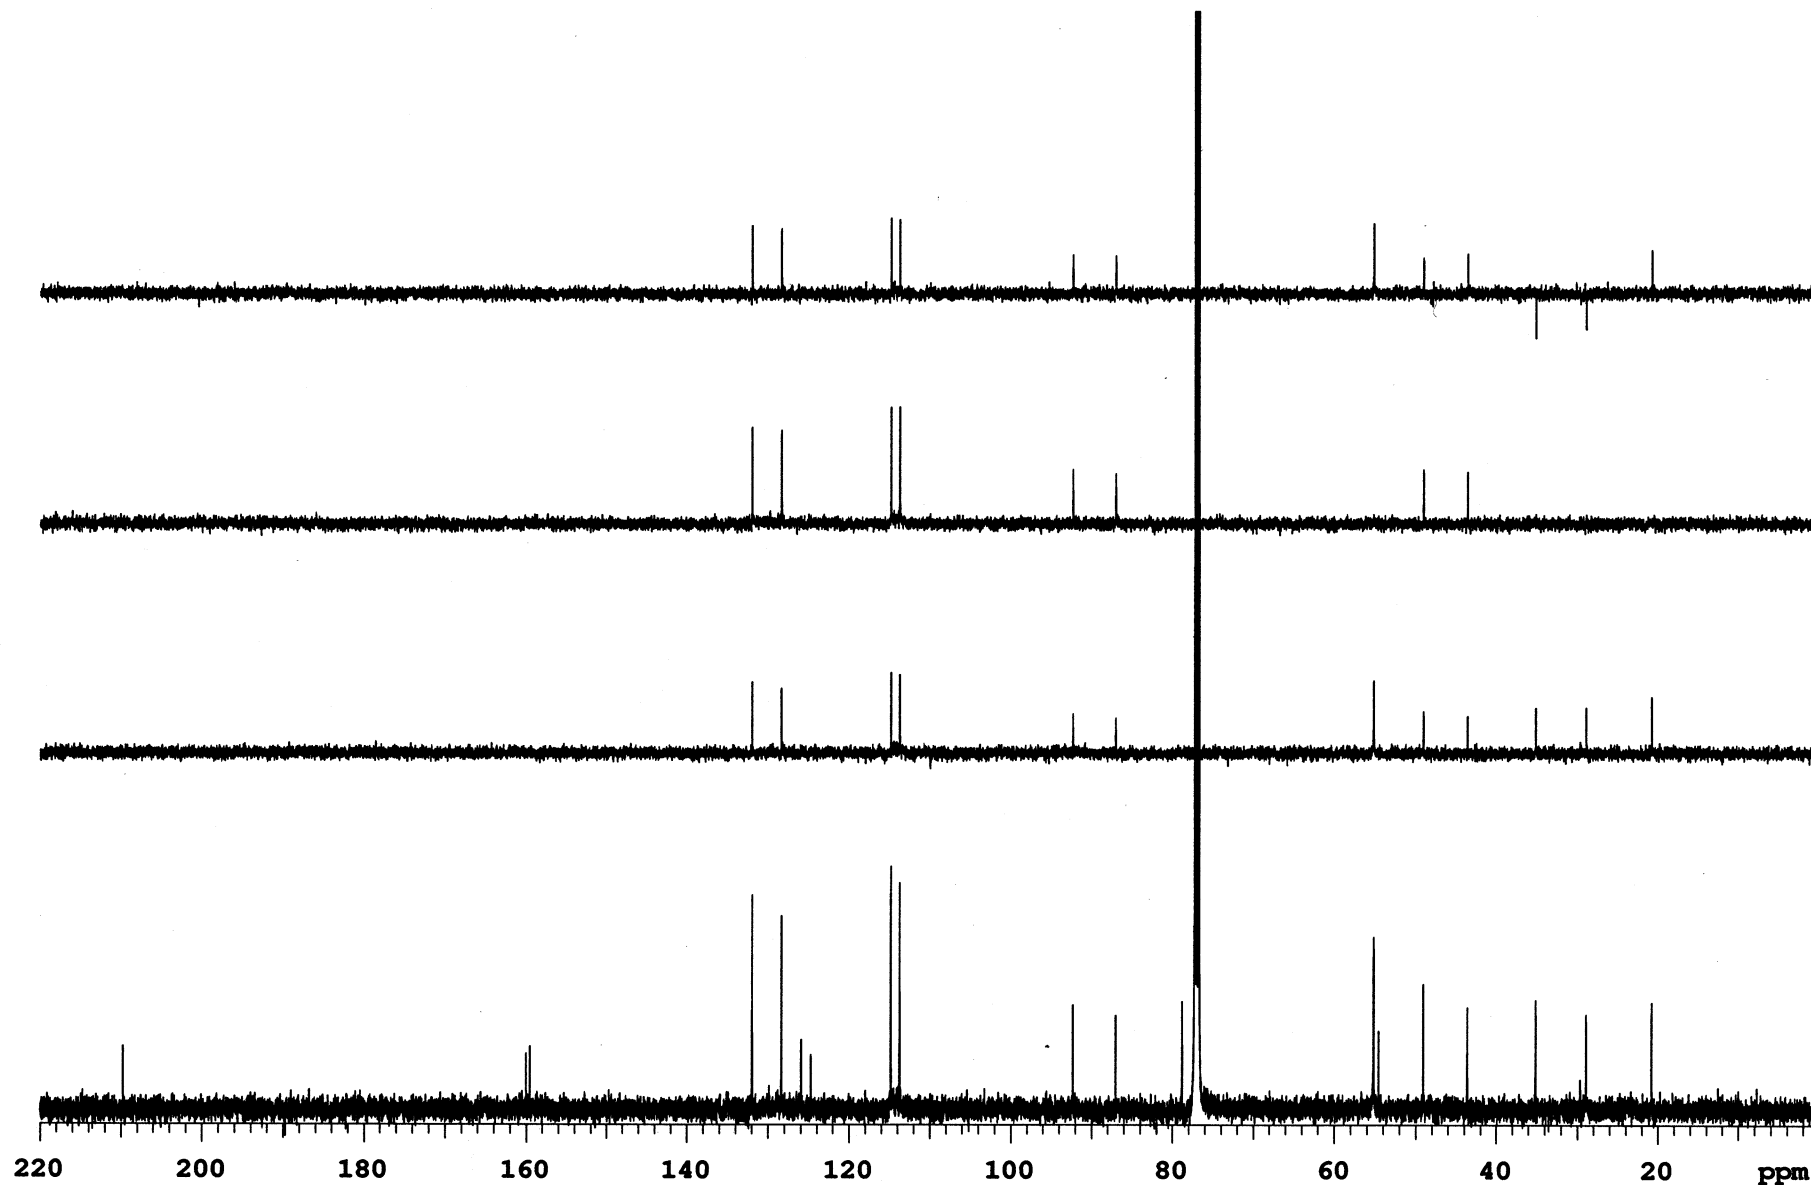



Fig S61. HSQC of compound 5c.

CHP-8c-f2

Sample Name **CHP-8c-f2**  
Date collected **2016-05-28**

Pulse sequence **gHSQC**  
Solvent **cdcl3**

Temperature **25**  
Spectrometer **Agilent-NMR-inova500**

Study owner **vnmr2**  
Operator **vnmr2**

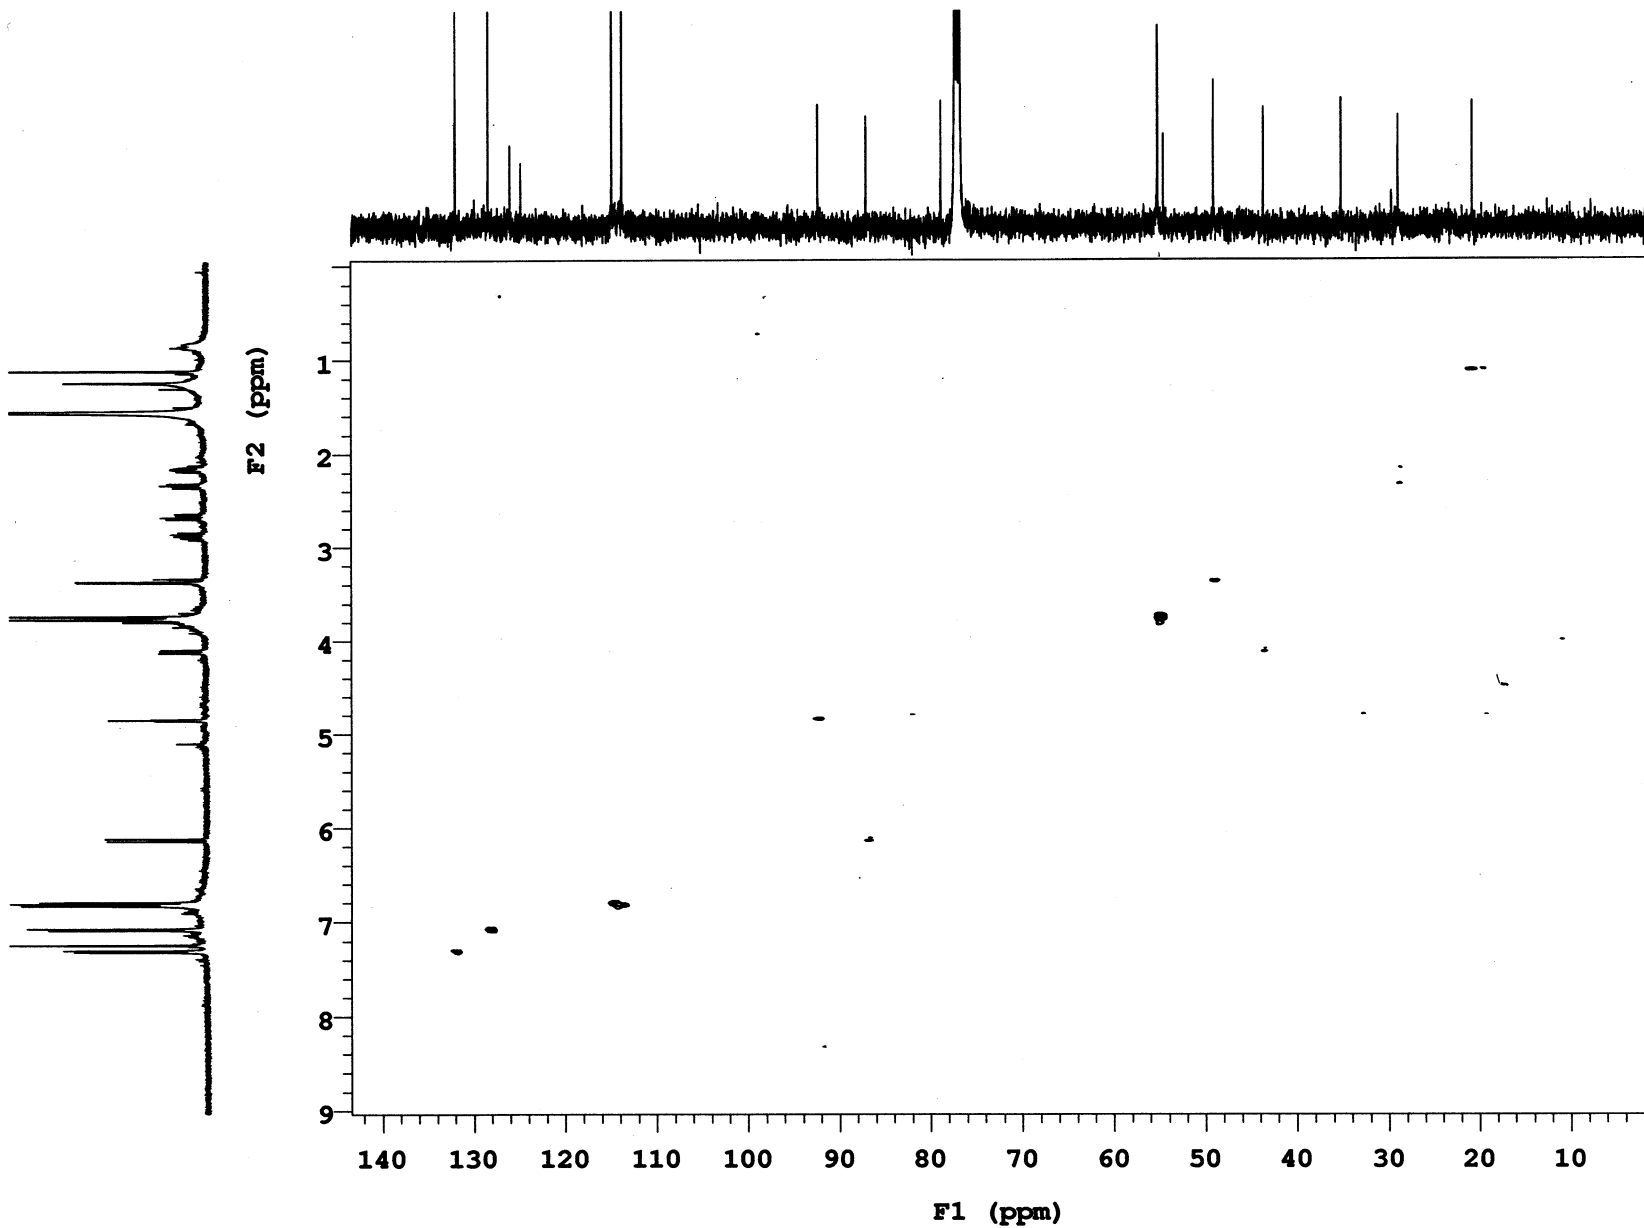



Fig S63. NOESY of compound 5c.

CHP-8c-f2

Sample Name **CHP-8c-f2**  
Date collected **2016-05-28**

Pulse sequence **NOESY**  
Solvent **cdcl3**

Temperature **25**  
Spectrometer **Agilent-NMR-inova500**

Study owner **vnmr2**  
Operator **vnmr2**

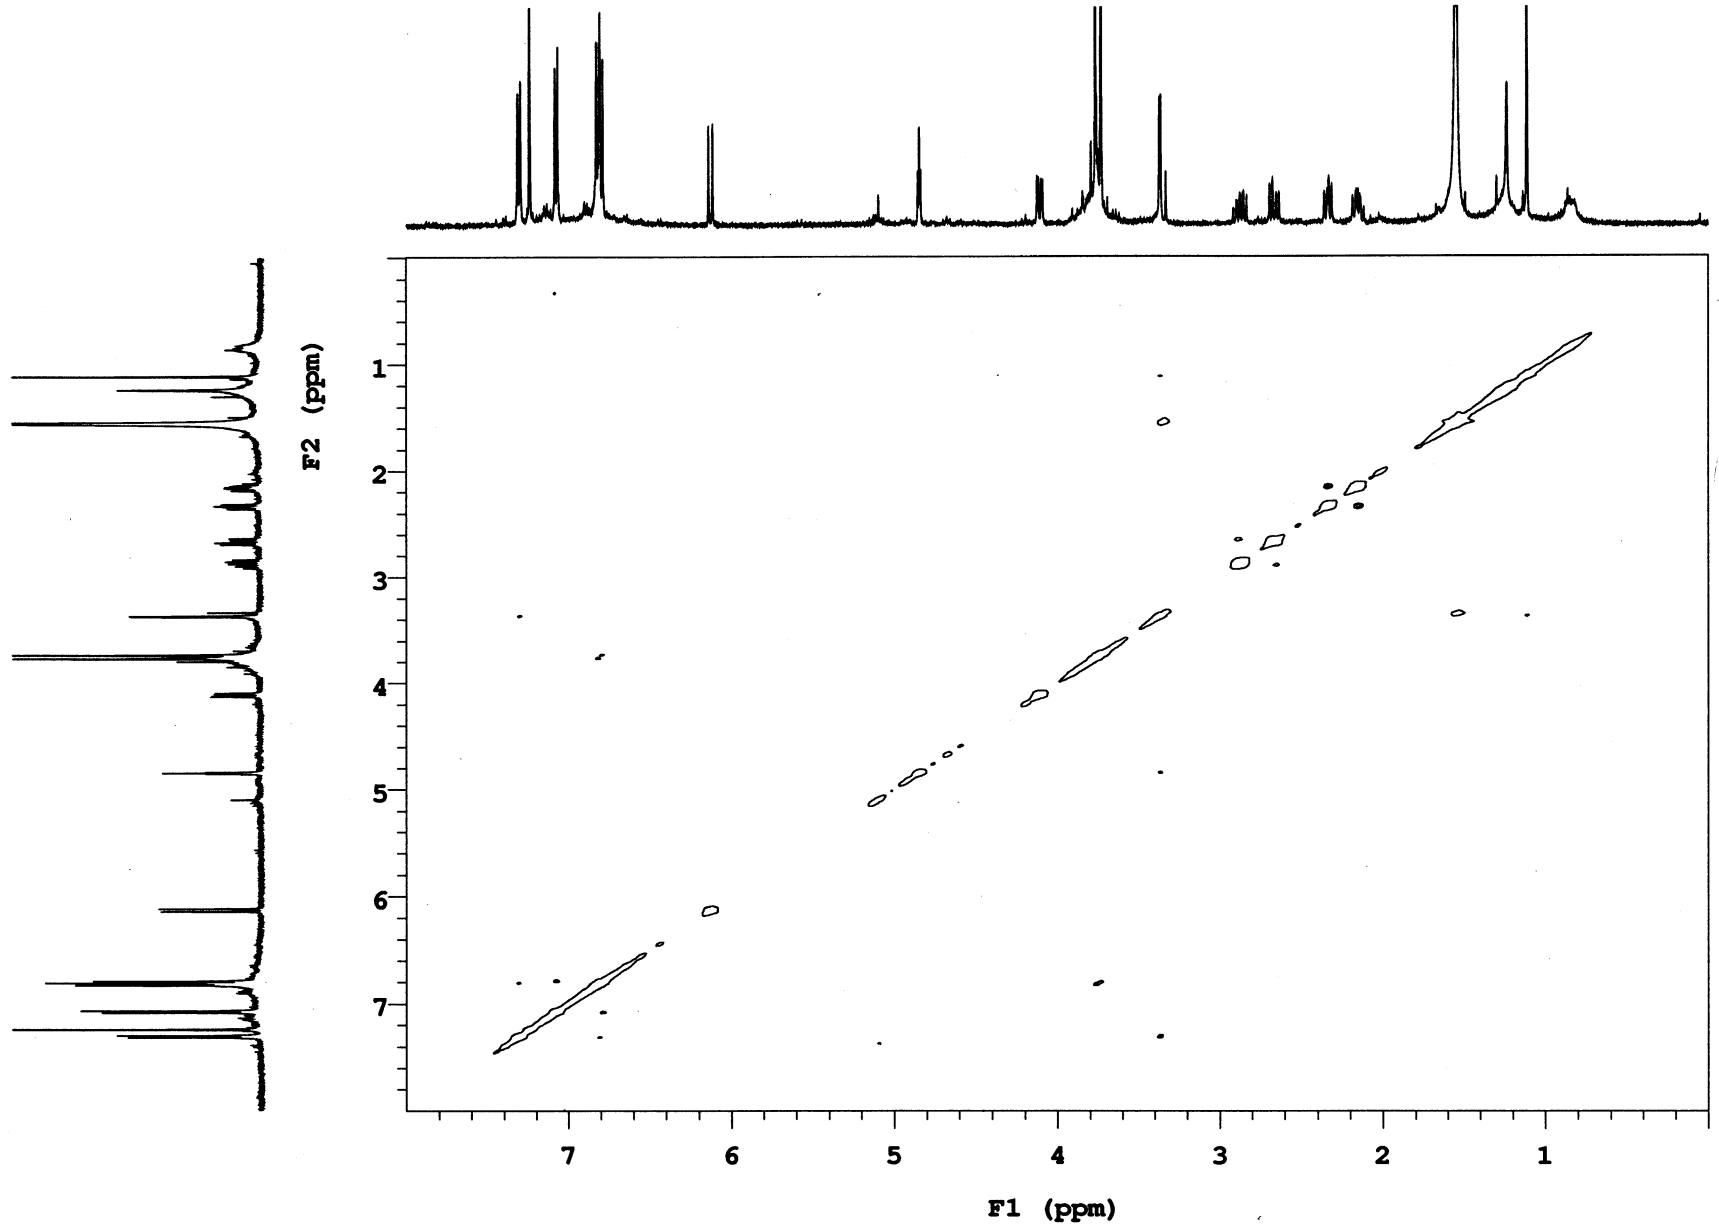

Fig S64. <sup>1</sup>H NMR (CD<sub>3</sub>CN, 500 MHz) of compound 3d.

CHP-8e

|                |            |                |        |              |                      |             |       |
|----------------|------------|----------------|--------|--------------|----------------------|-------------|-------|
| Sample Name    | CHP-8e     | Pulse sequence | PROTON | Temperature  | 25                   | Study owner | vnmr2 |
| Date collected | 2016-03-24 | Solvent        | cd3cn  | Spectrometer | Agilent-NMR-inova500 | Operator    | vnmr2 |

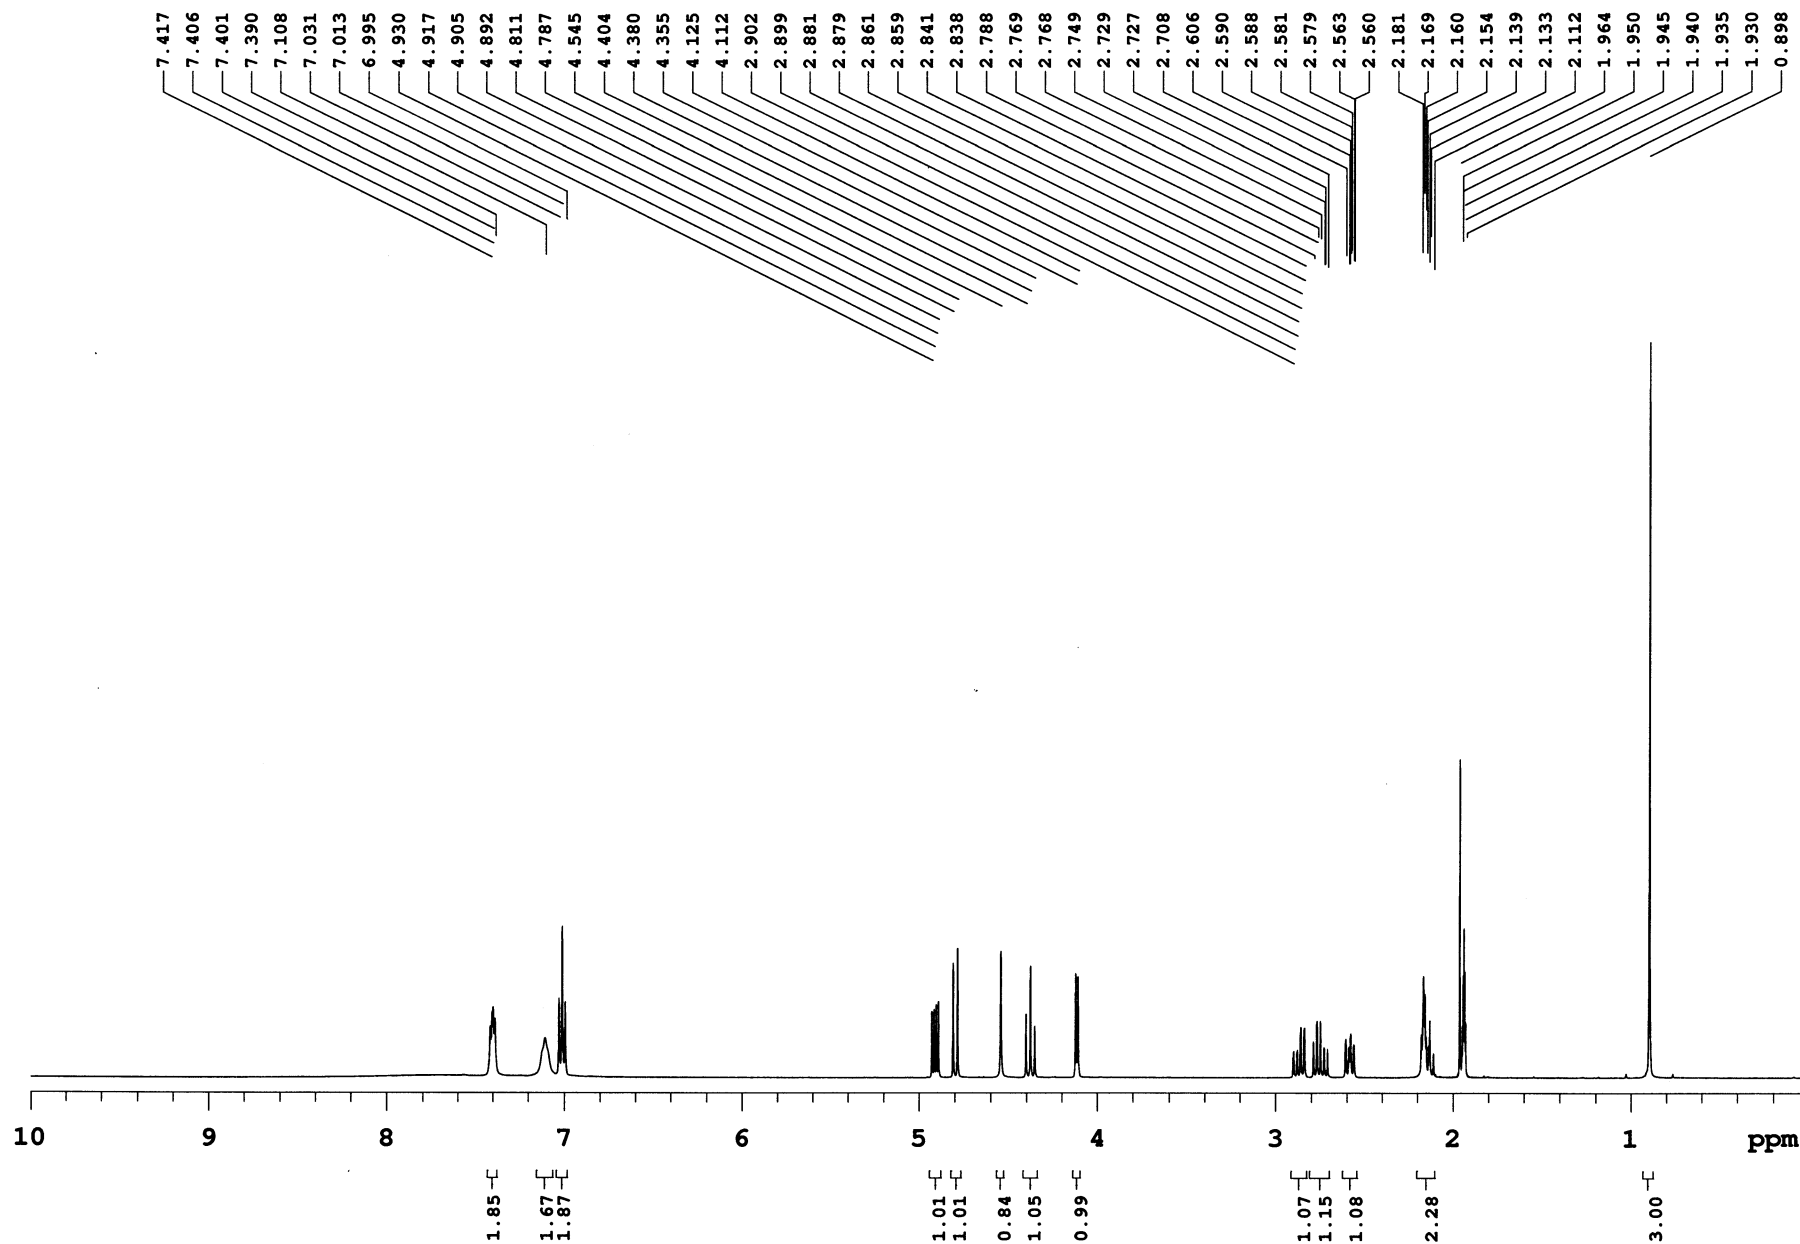

Fig S65. <sup>13</sup>C NMR (CD<sub>3</sub>CN, 125 MHz) of compound 3d.

CHP-8e

Sample Name **CHP-8e**  
Date collected **2016-03-24**

Pulse sequence **CARBON**  
Solvent **cd3cn**

Temperature **25**  
Spectrometer **Agilent-NMR-inova500**

Study owner **vnmr2**  
Operator **vnmr2**

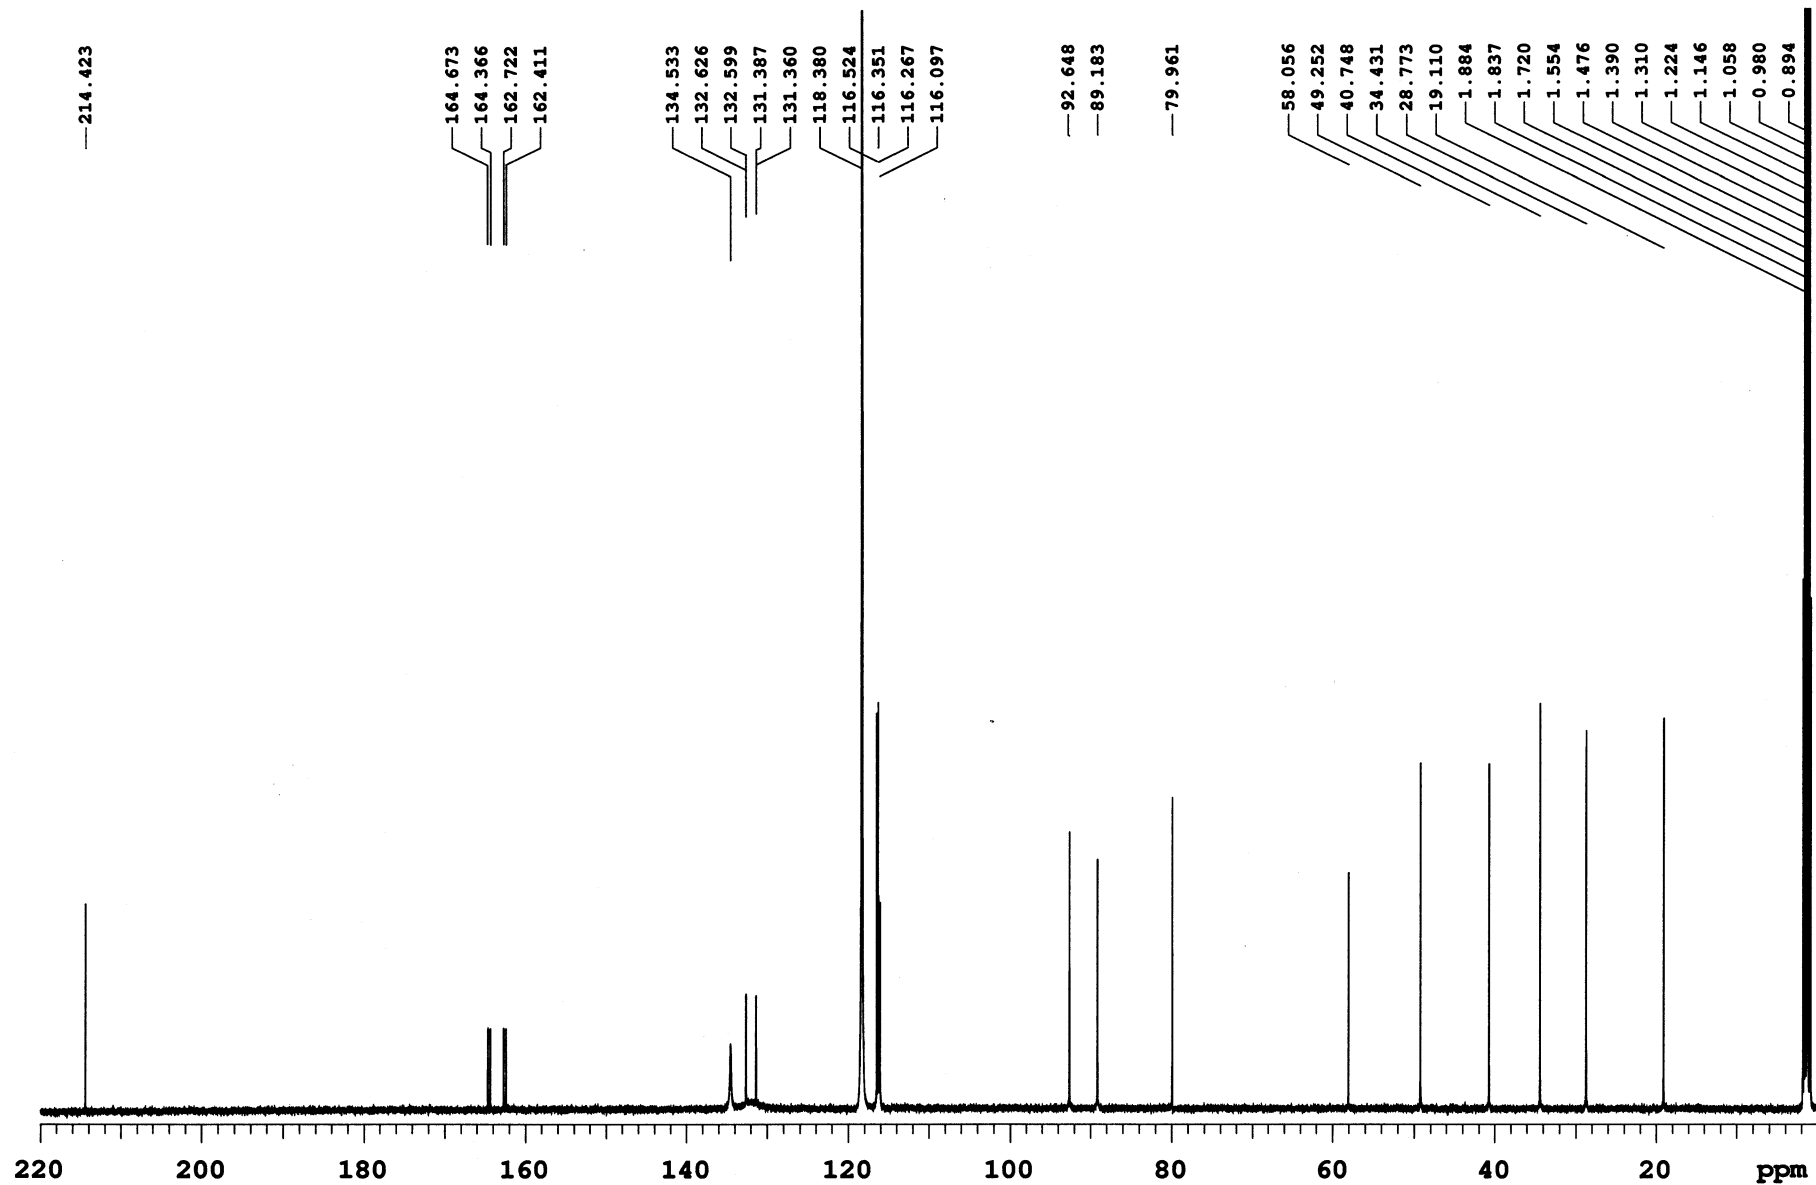

Fig S66. DEPT of compound 3d.

CHP-8e

Sample Name **CHP-8e**  
Date collected **2016-03-24**

Pulse sequence **DEPT**  
Solvent **cd3cn**

Temperature **25**  
Spectrometer **Agilent-NMR-inova500**

Study owner **vnmr2**  
Operator **vnmr2**

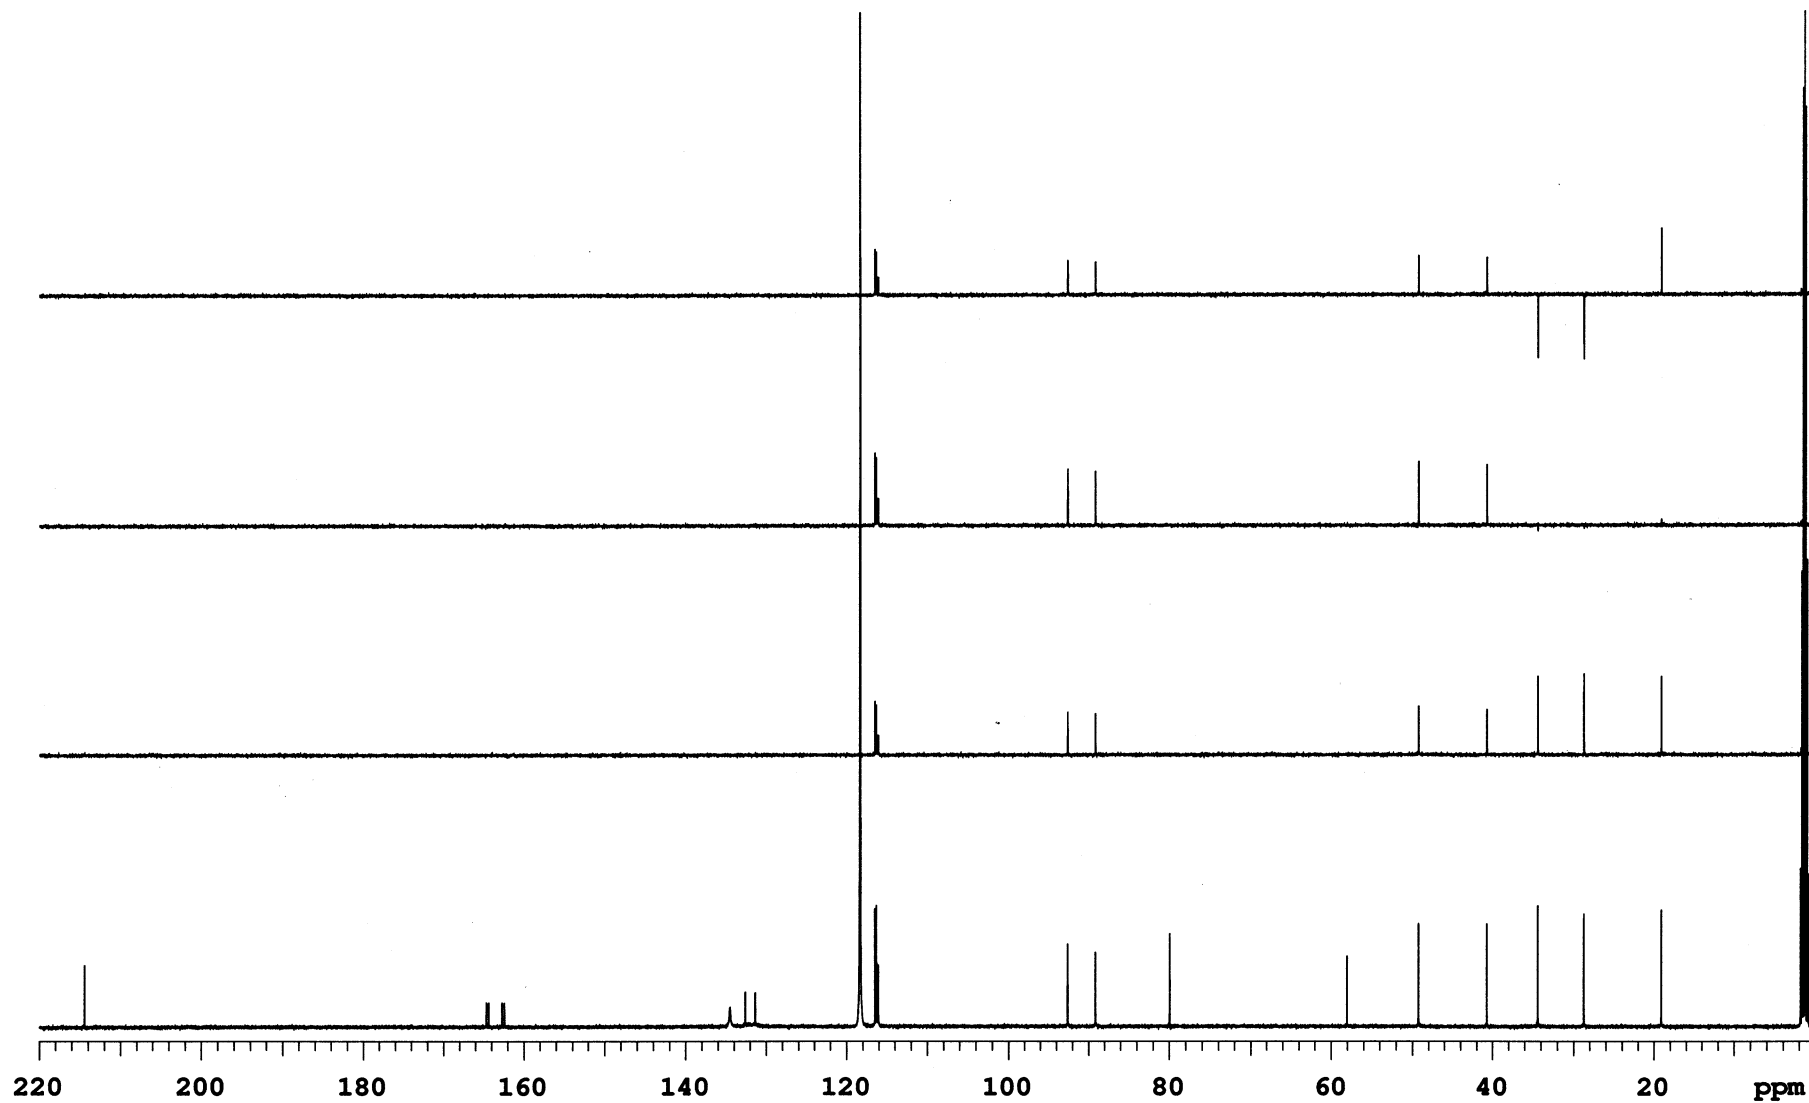

Fig S67. DEPT of compound 3d, expanded.

CHP-8e

|                |            |                |       |              |                      |             |       |
|----------------|------------|----------------|-------|--------------|----------------------|-------------|-------|
| Sample Name    | CHP-8e     | Pulse sequence | DEPT  | Temperature  | 25                   | Study owner | vnmr2 |
| Date collected | 2016-03-24 | Solvent        | cd3cn | Spectrometer | Agilent-NMR-inova500 | Operator    | vnmr2 |

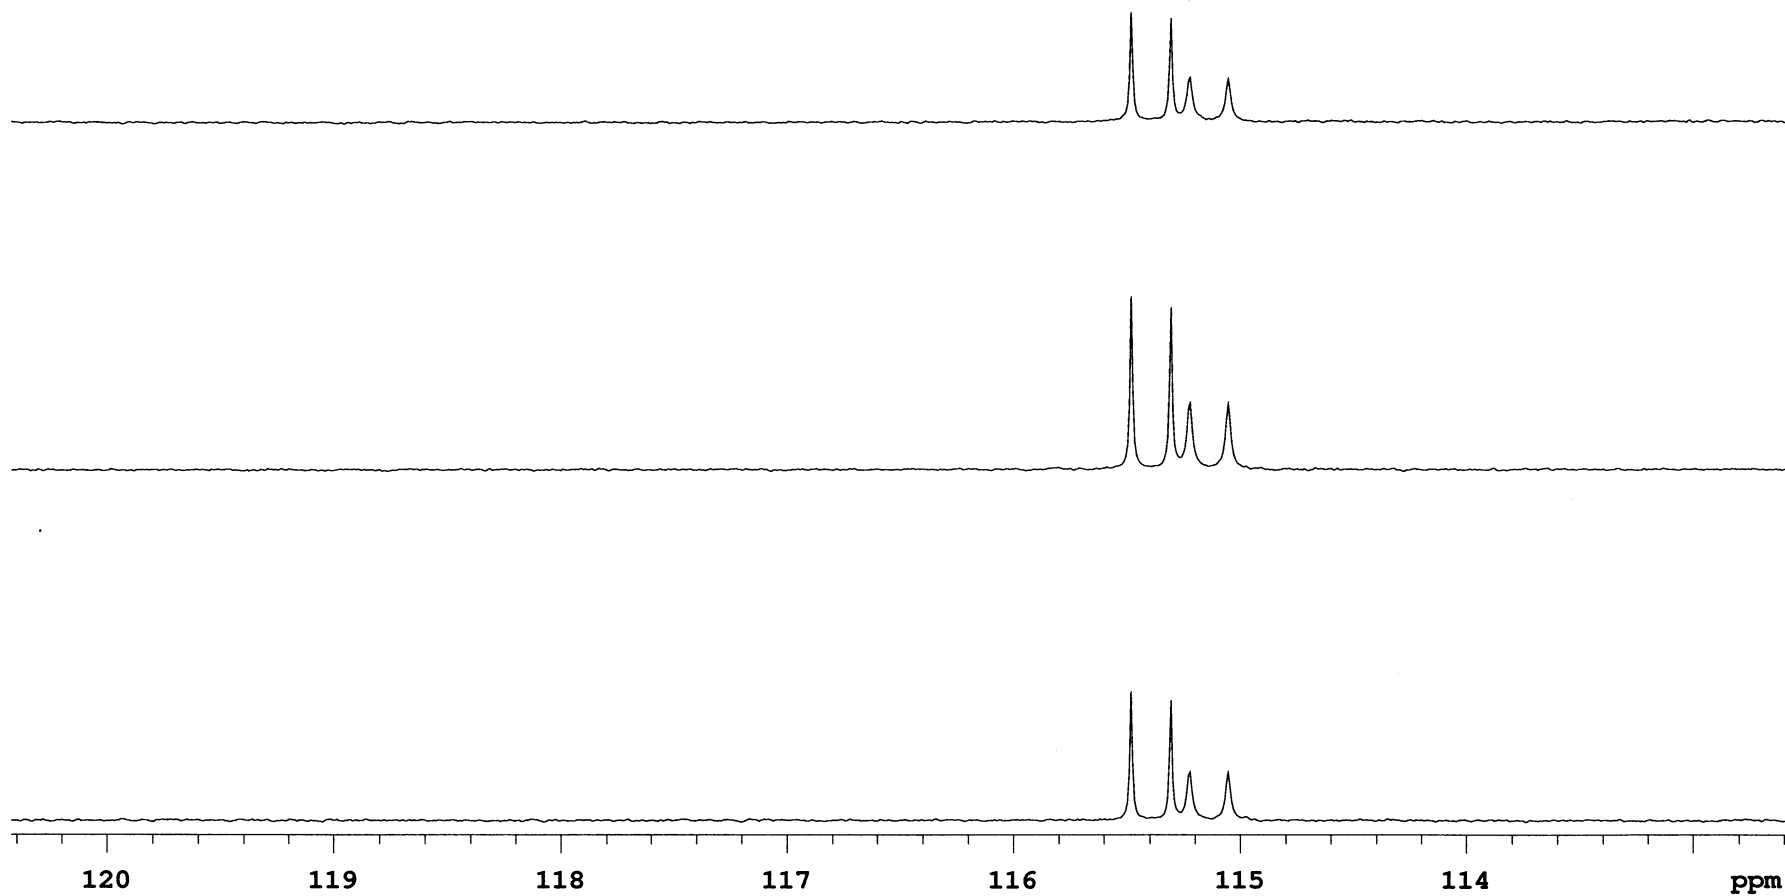

Fig S68. HSQC of compound 3d.

CHP-8e

Sample Name **CHP-8e**  
Date collected **2016-03-24**

Pulse sequence **gHSQC**  
Solvent **cd3cn**

Temperature **25**  
Spectrometer **Agilent-NMR-inova500**

Study owner **vnmr2**  
Operator **vnmr2**

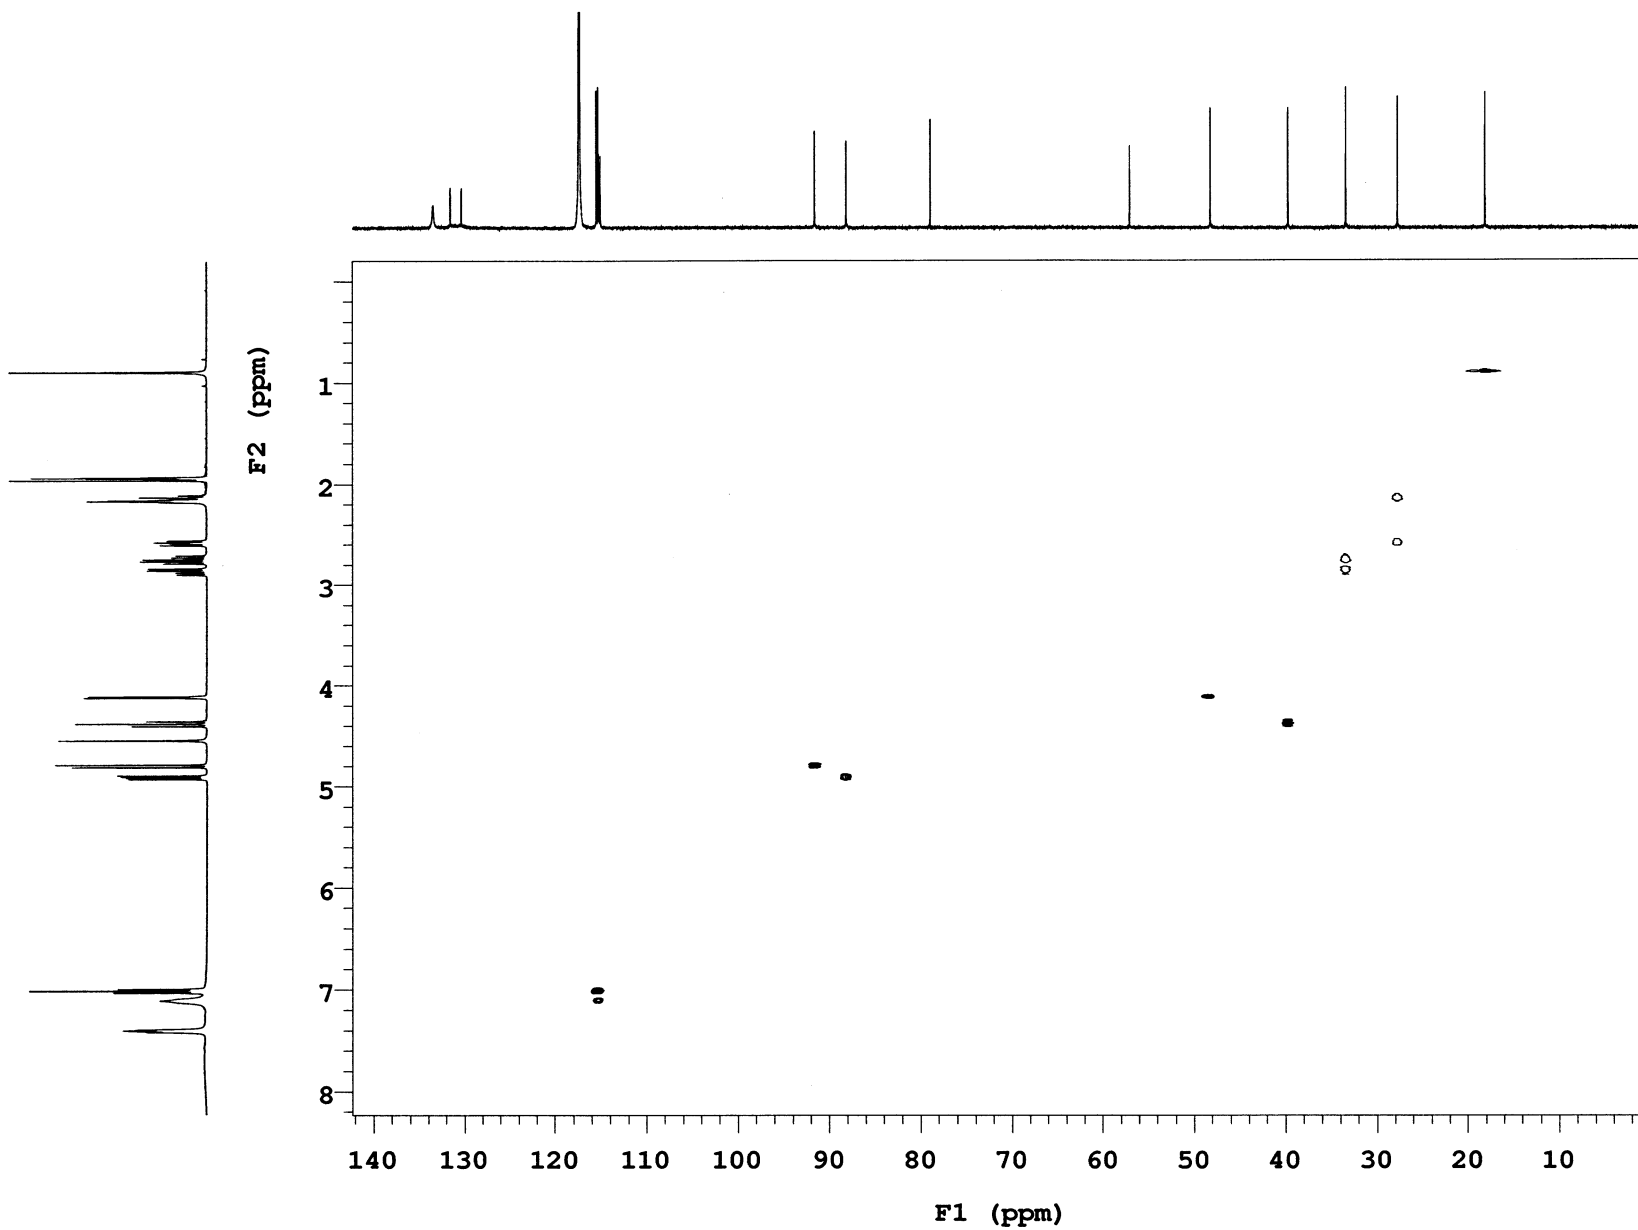



Fig S69. COSY of compound 3d.

CHP-8e

Sample Name **CHP-8e**  
Date collected **2016-03-24**

Pulse sequence **gCOSY**  
Solvent **cd3cn**

Temperature **25**  
Spectrometer **Agilent-NMR-inova500**

Study owner **vnmr2**  
Operator **vnmr2**

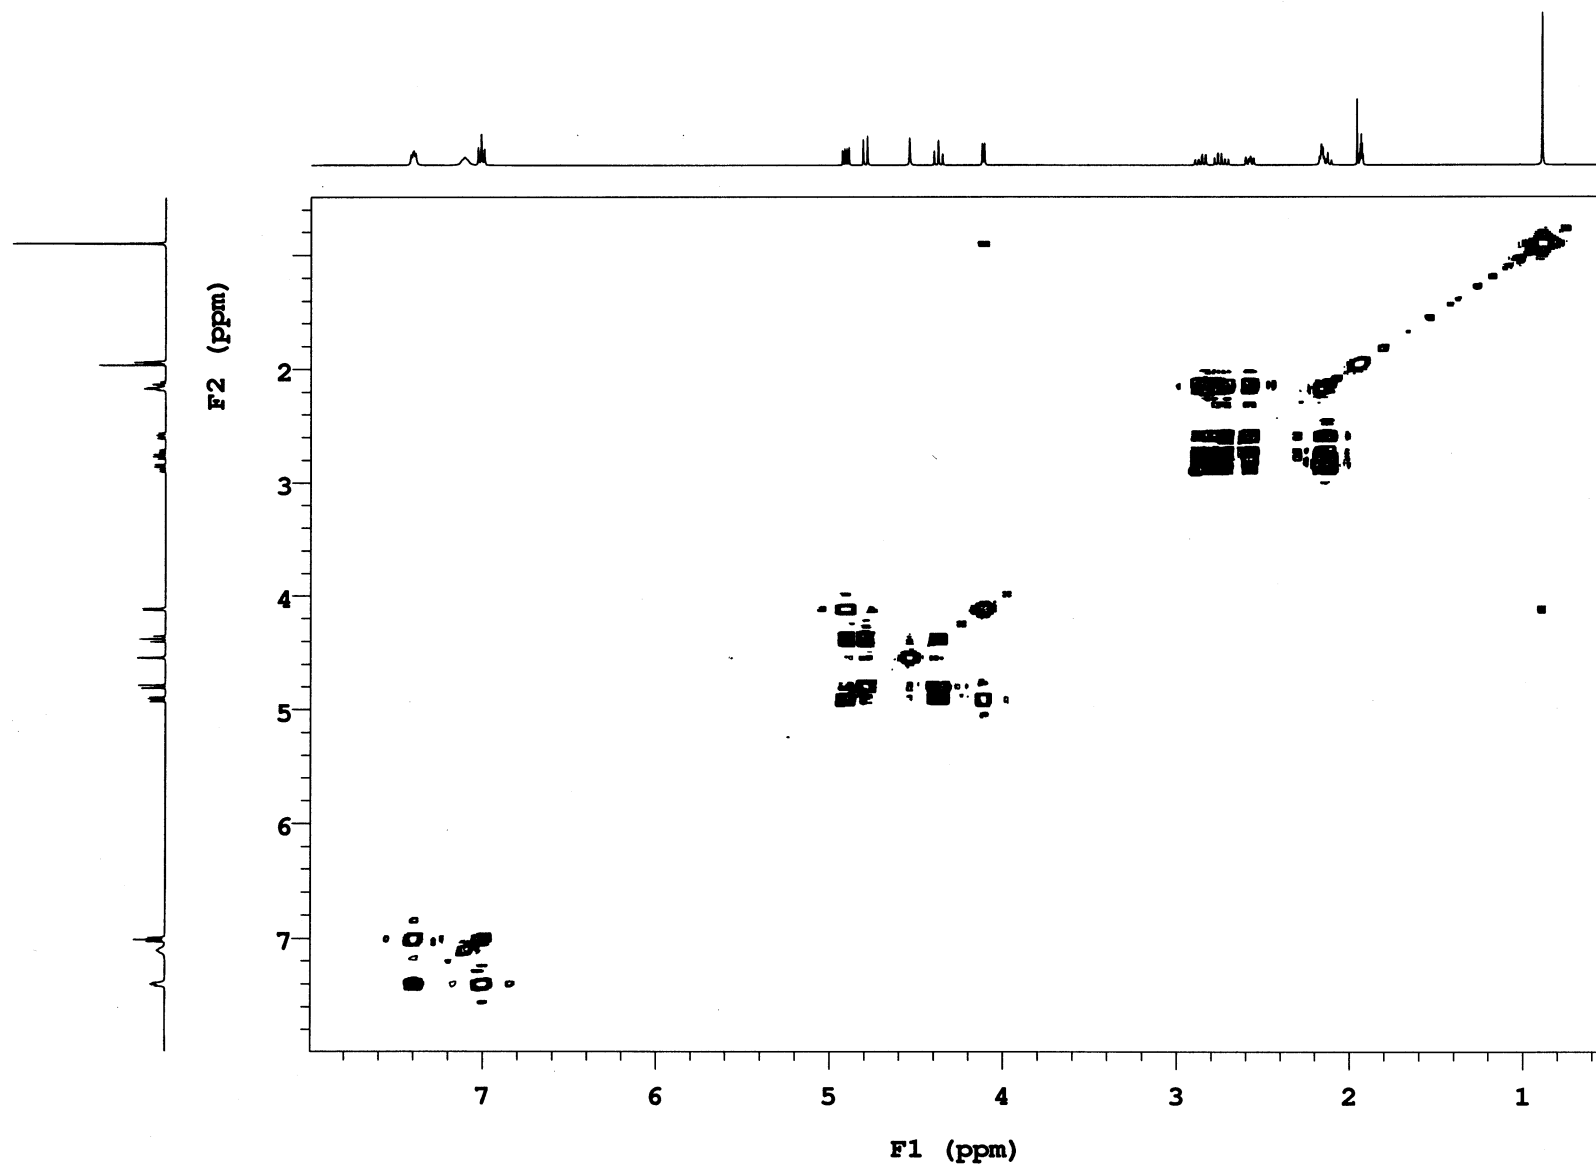



Fig S71. <sup>1</sup>H NMR (CD<sub>3</sub>CN, 500 MHz) of compound 5d.

CHP-8e-f2

Sample Name **CHP-8e-f2**  
Date collected **2016-05-11**

Pulse sequence **PROTON**  
Solvent **cd3cn**

Temperature **25**  
Spectrometer **Agilent-NMR-inova500**

Study owner **vnmr2**  
Operator **vnmr2**

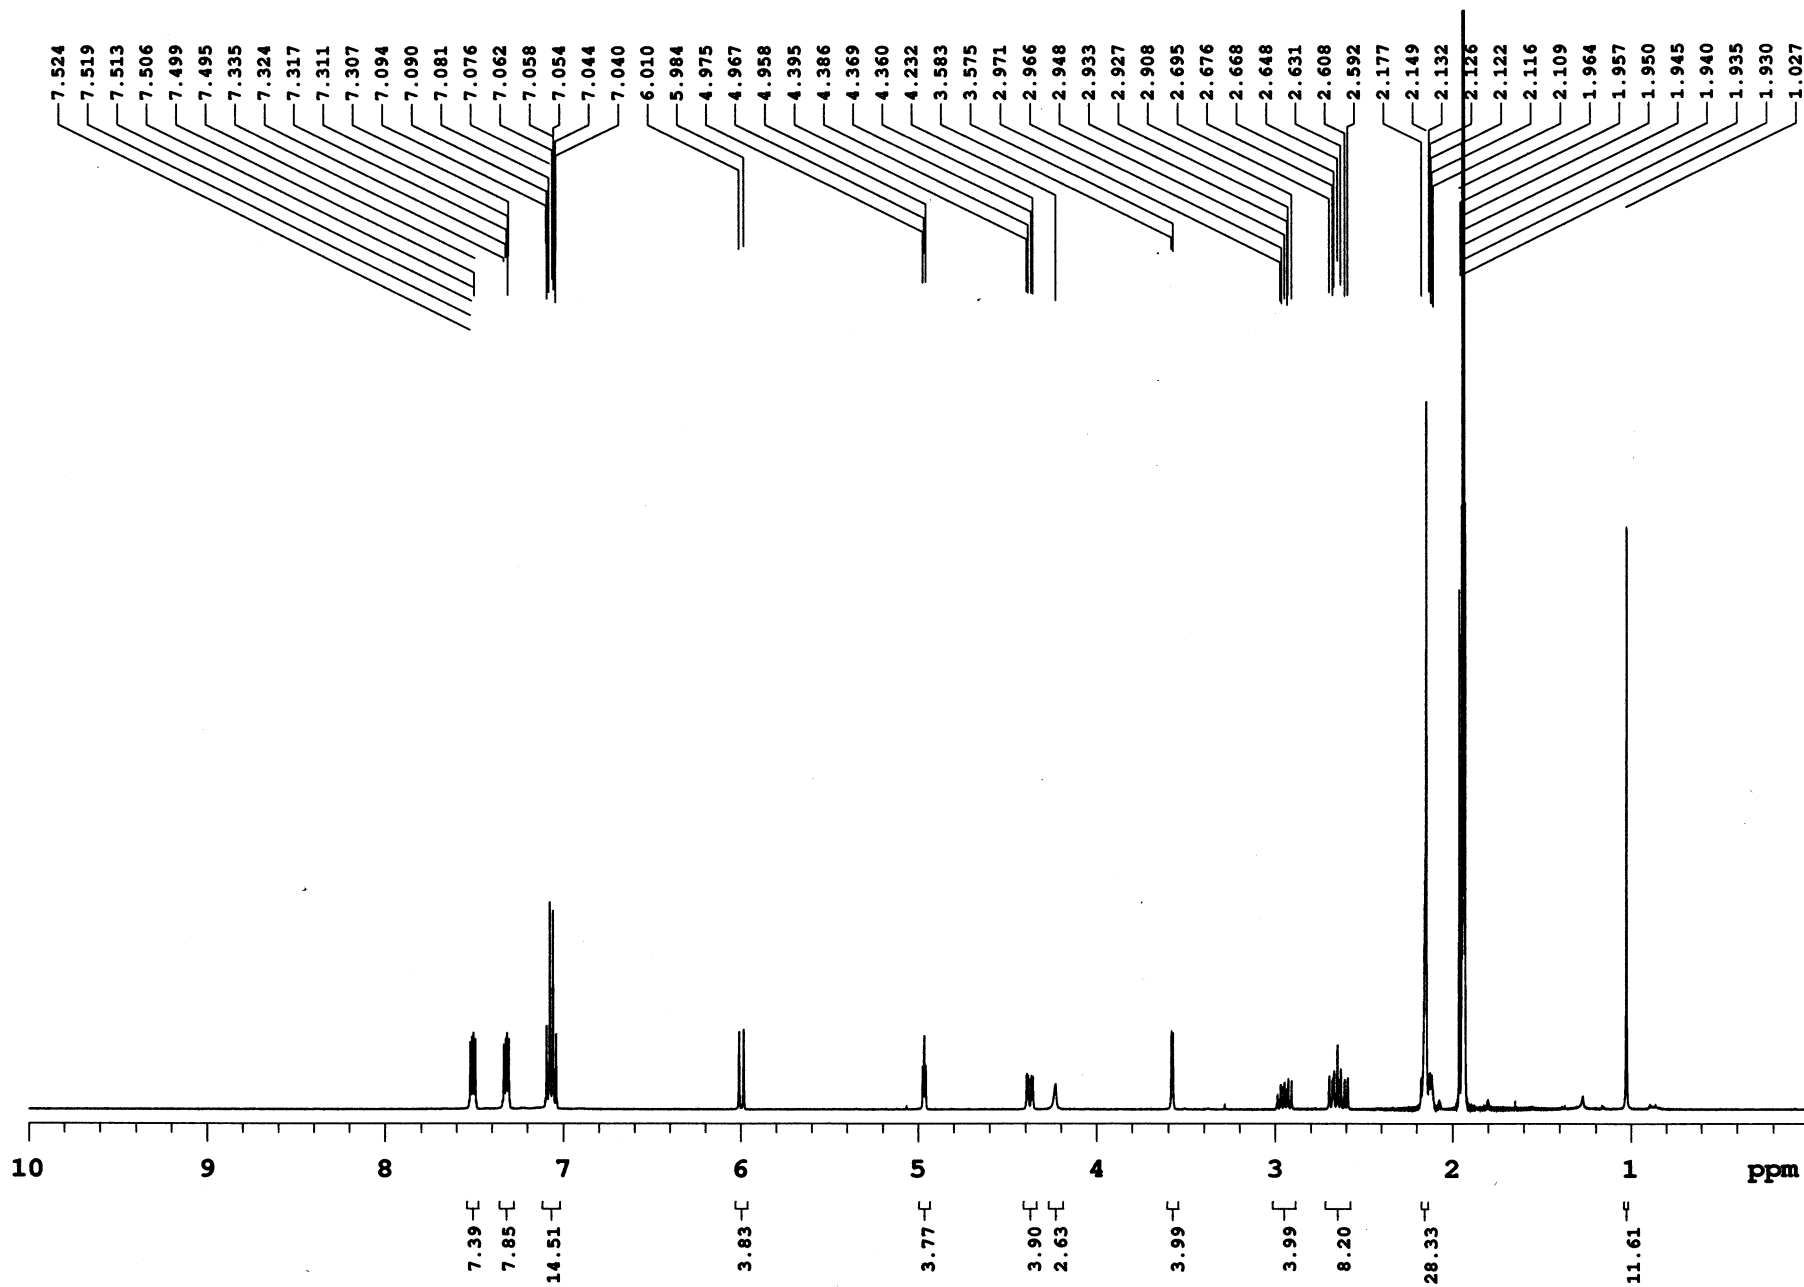

Fig S72. <sup>13</sup>C NMR (CD<sub>3</sub>CN, 125 MHz) of compound 5d.

CHP-8e-12

Sample Name **CHP-8e-12**  
Date collected **2016-05-11**

Pulse sequence **CARBON**  
Solvent **cd3cn**

Temperature **25**  
Spectrometer **Agilent-NMR-inova500**

Study owner **vnmr2**  
Operator **vnmr2**

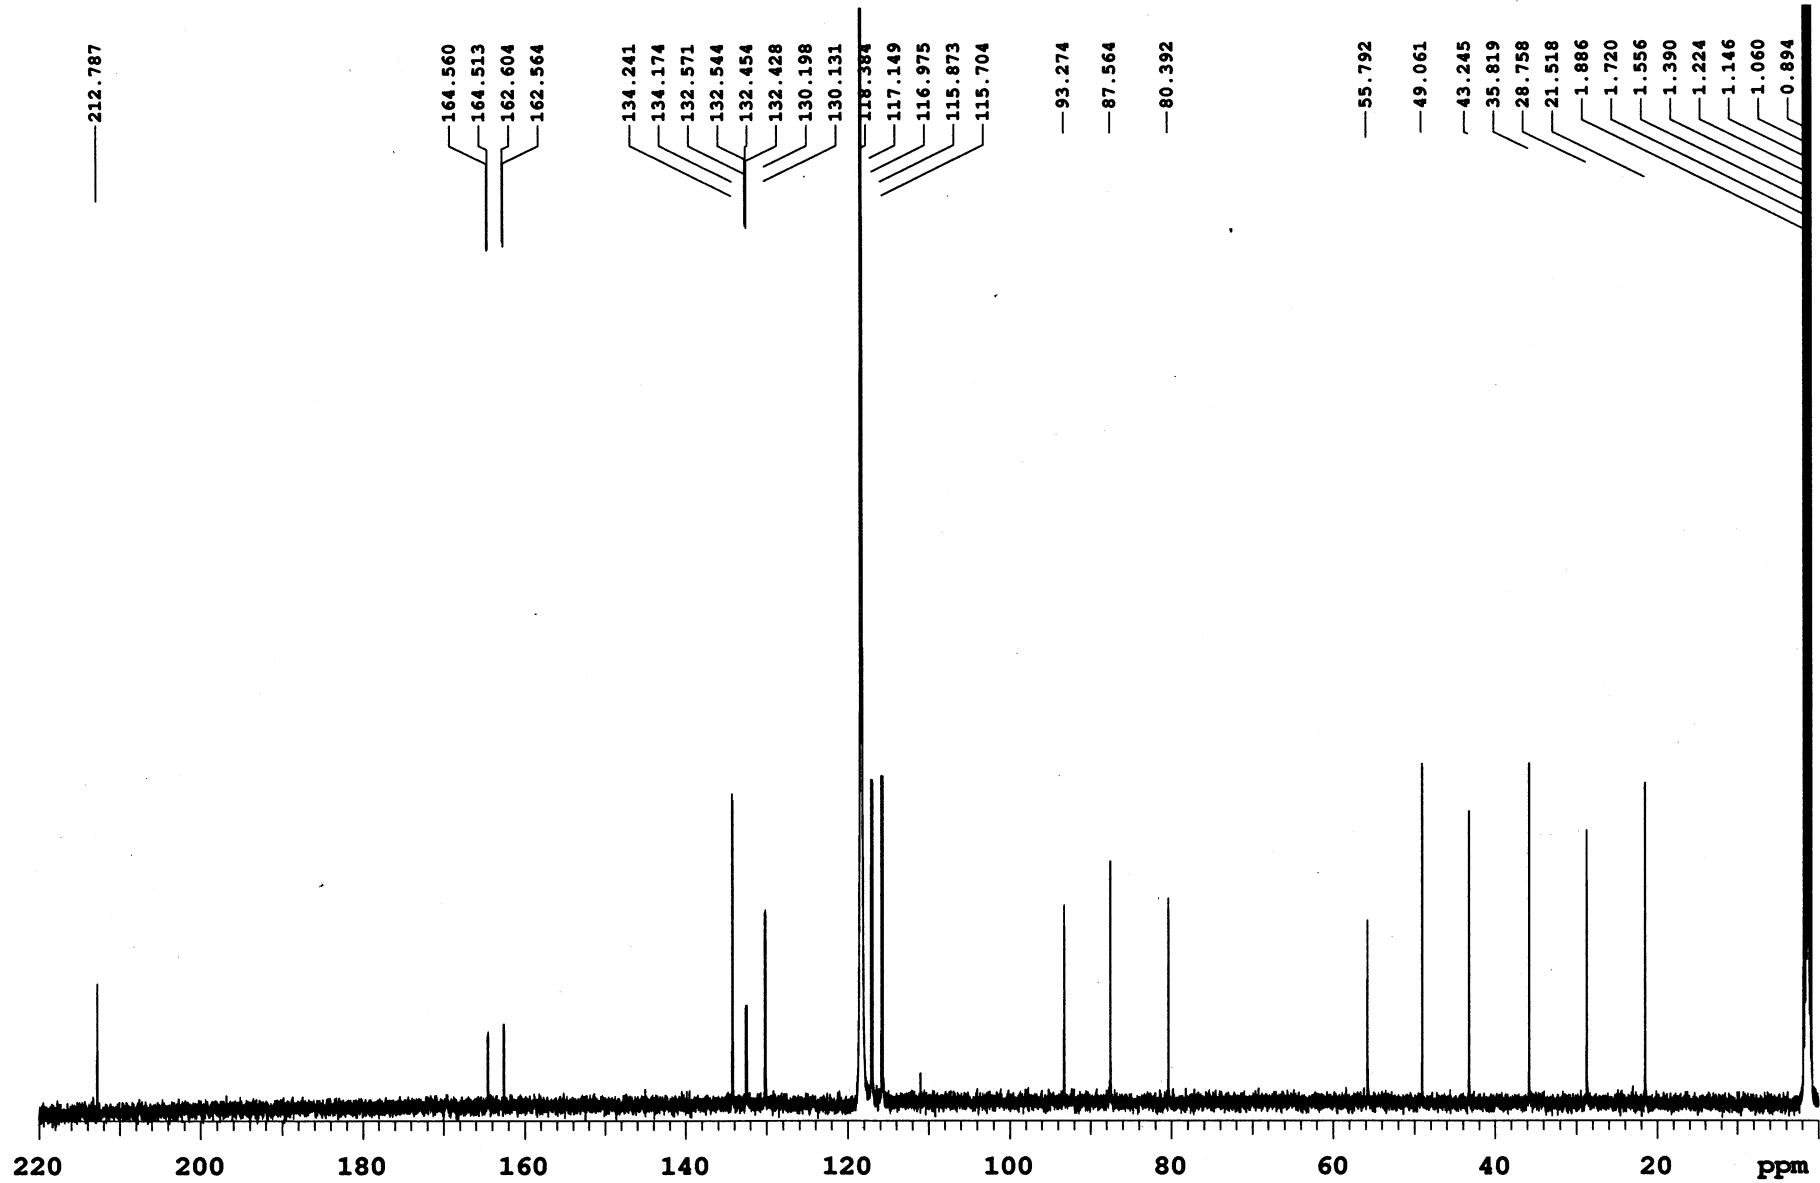

Fig S73. DEPT of compound 5d.

CHP-8e-12

Sample Name **CHP-8e-12**  
Date collected **2016-05-12**

Pulse sequence **DEPT**  
Solvent **cd3cn**

Temperature **25**  
Spectrometer **Agilent-NMR-inova500**

Study owner **vnmr2**  
Operator **vnmr2**

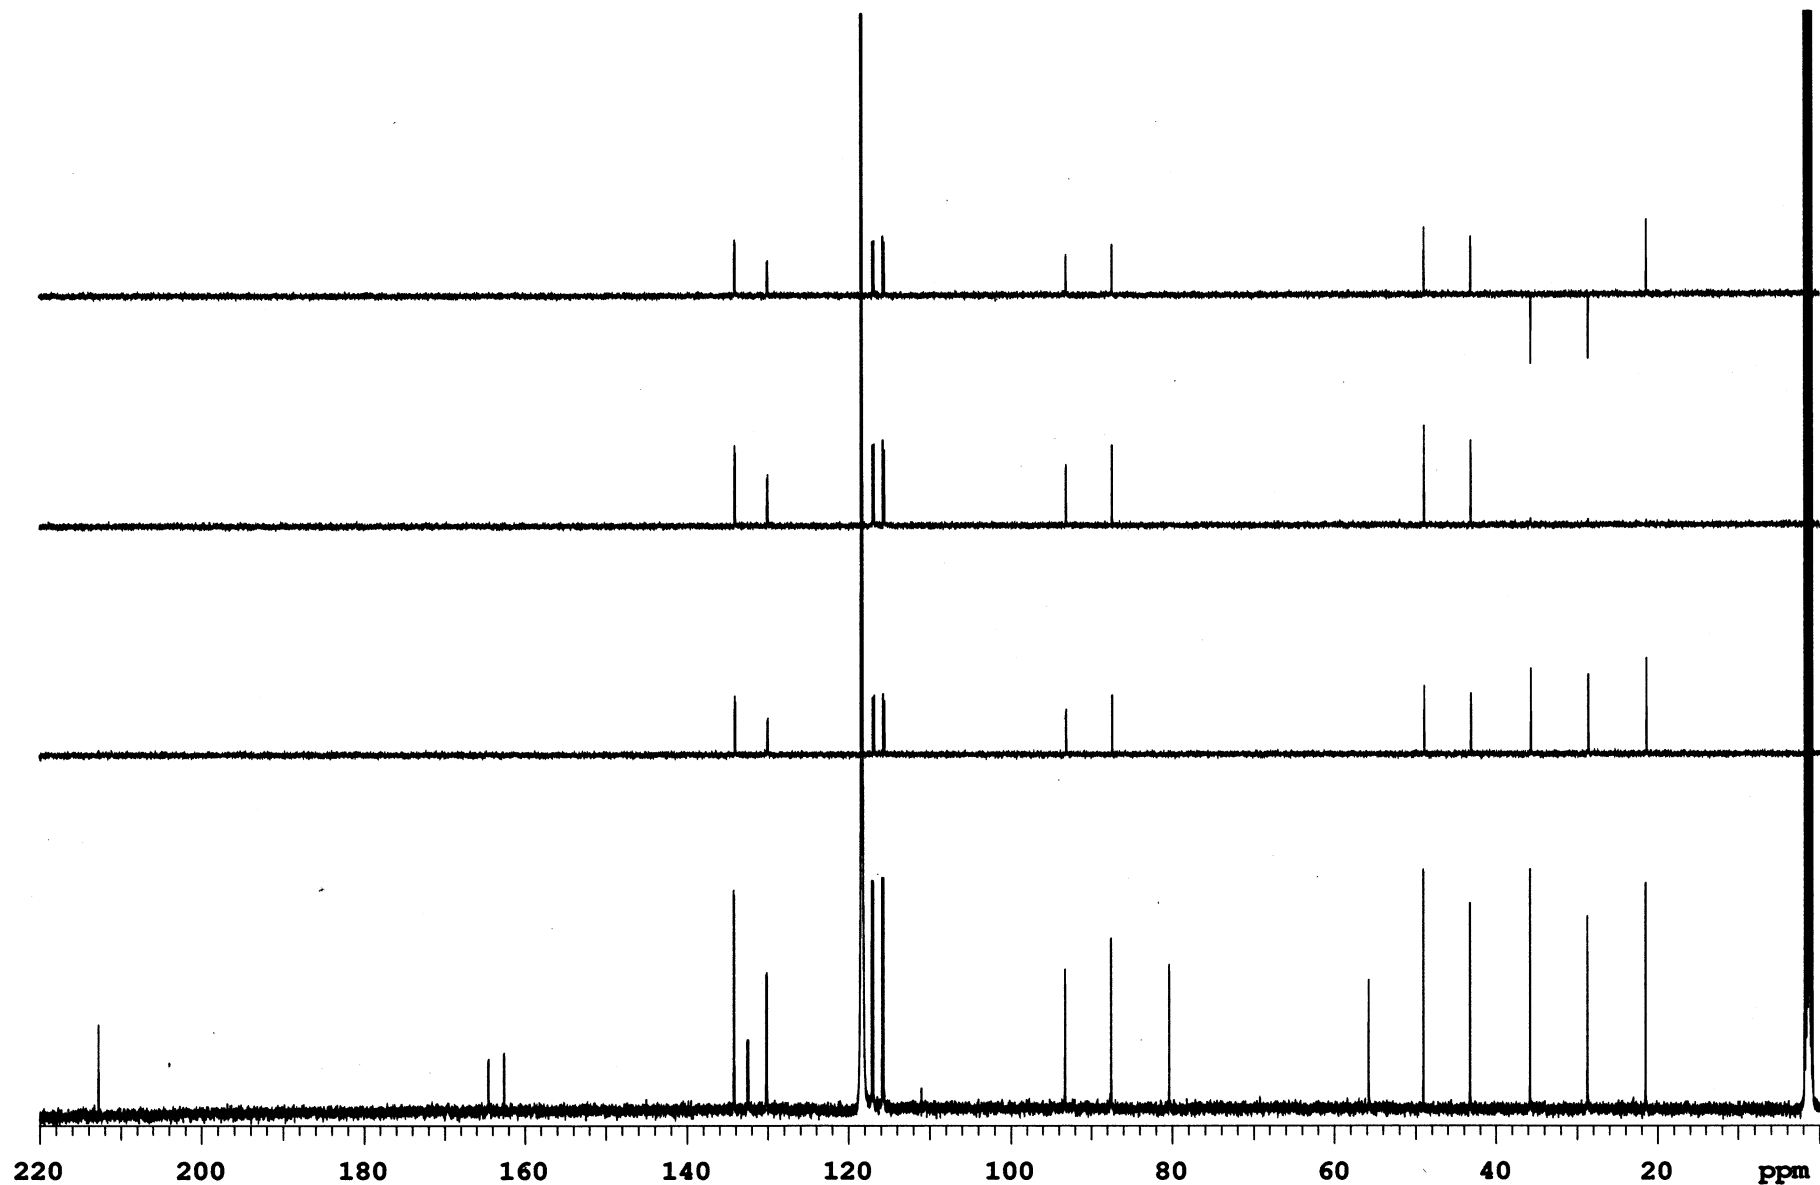

Fig S74. HSQC of compound 5d.

CHP-8e-f2

Sample Name **CHP-8e-f2**  
Date collected **2016-05-12**

Pulse sequence **gHSQC**  
Solvent **cd3cn**

Temperature **25**  
Spectrometer **Agilent-NMR-inova500**

Study owner **vnmr2**  
Operator **vnmr2**

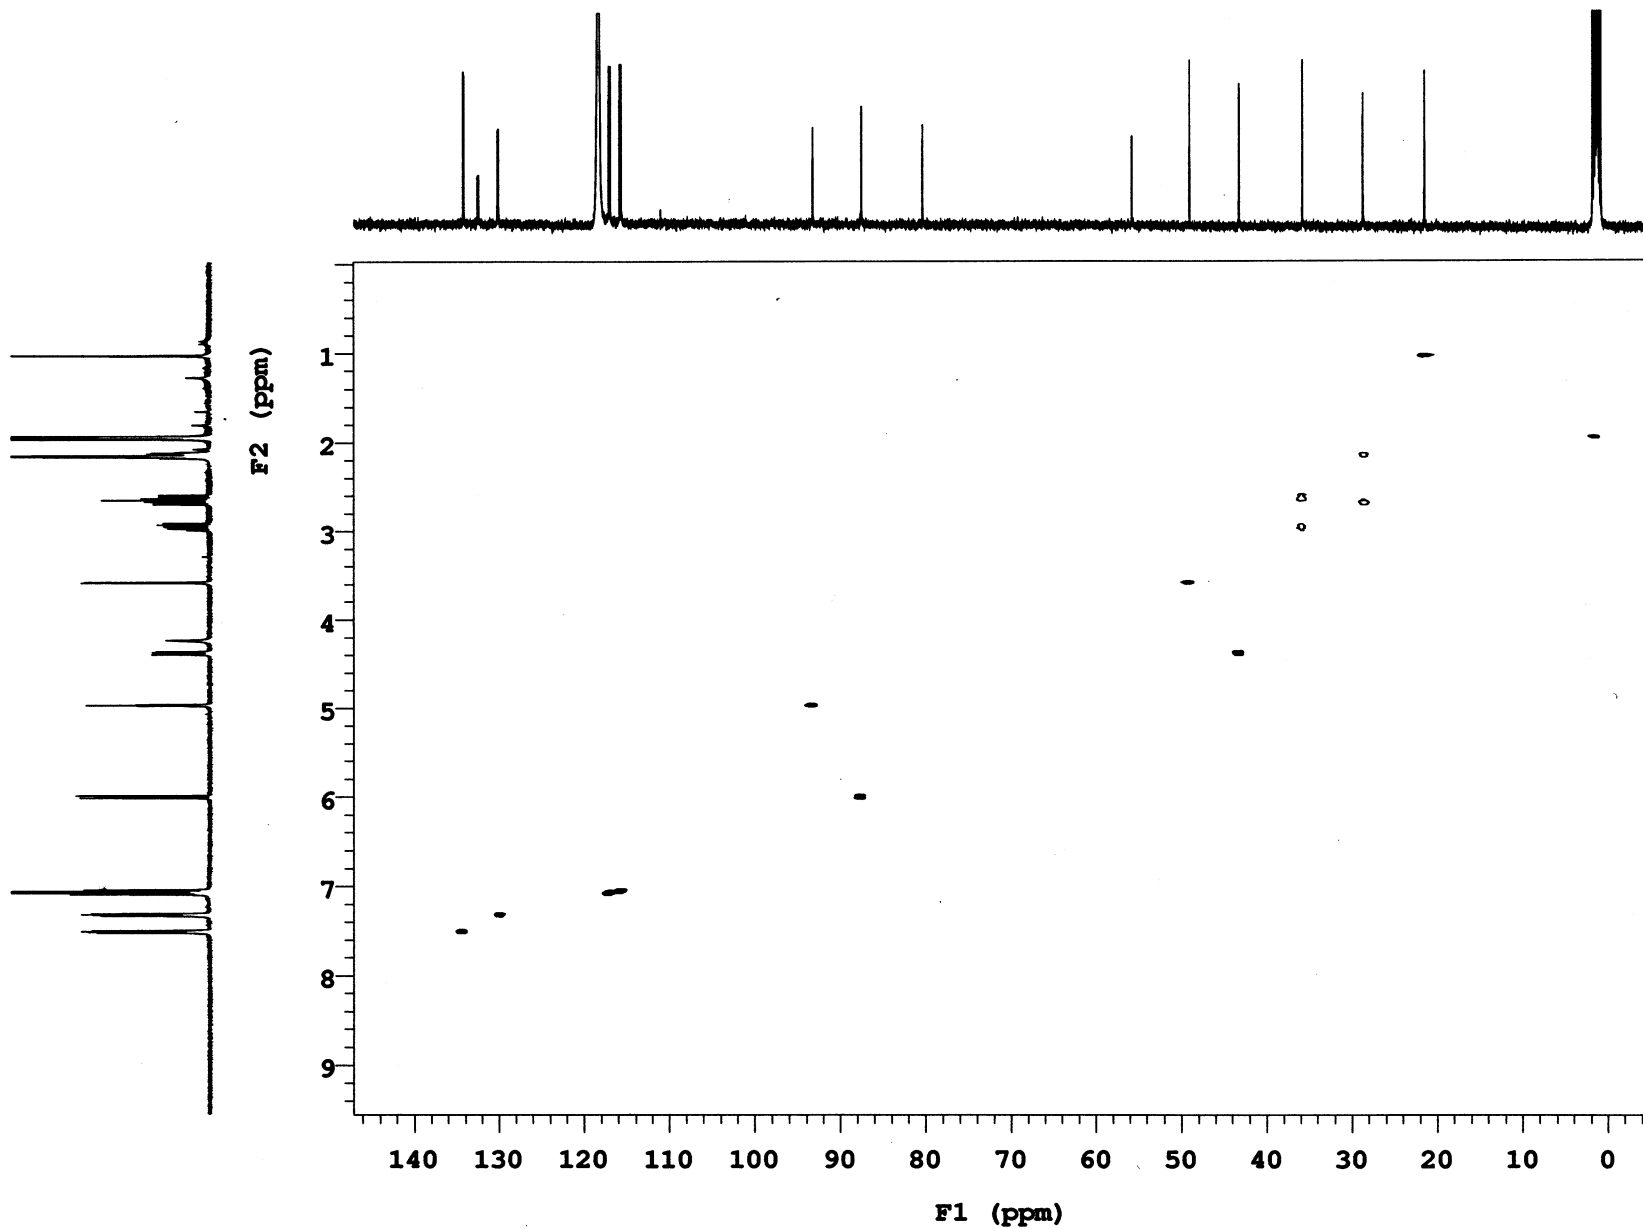

Fig S75. HSQC of compound 5d, expanded.

CHP-8e-f2

Sample Name **CHP-8e-f2**  
Date collected **2016-05-12**

Pulse sequence **gHSQC**  
Solvent **cd3cn**

Temperature **25**  
Spectrometer **Agilent-NMR-inova500**

Study owner **vnmr2**  
Operator **vnmr2**

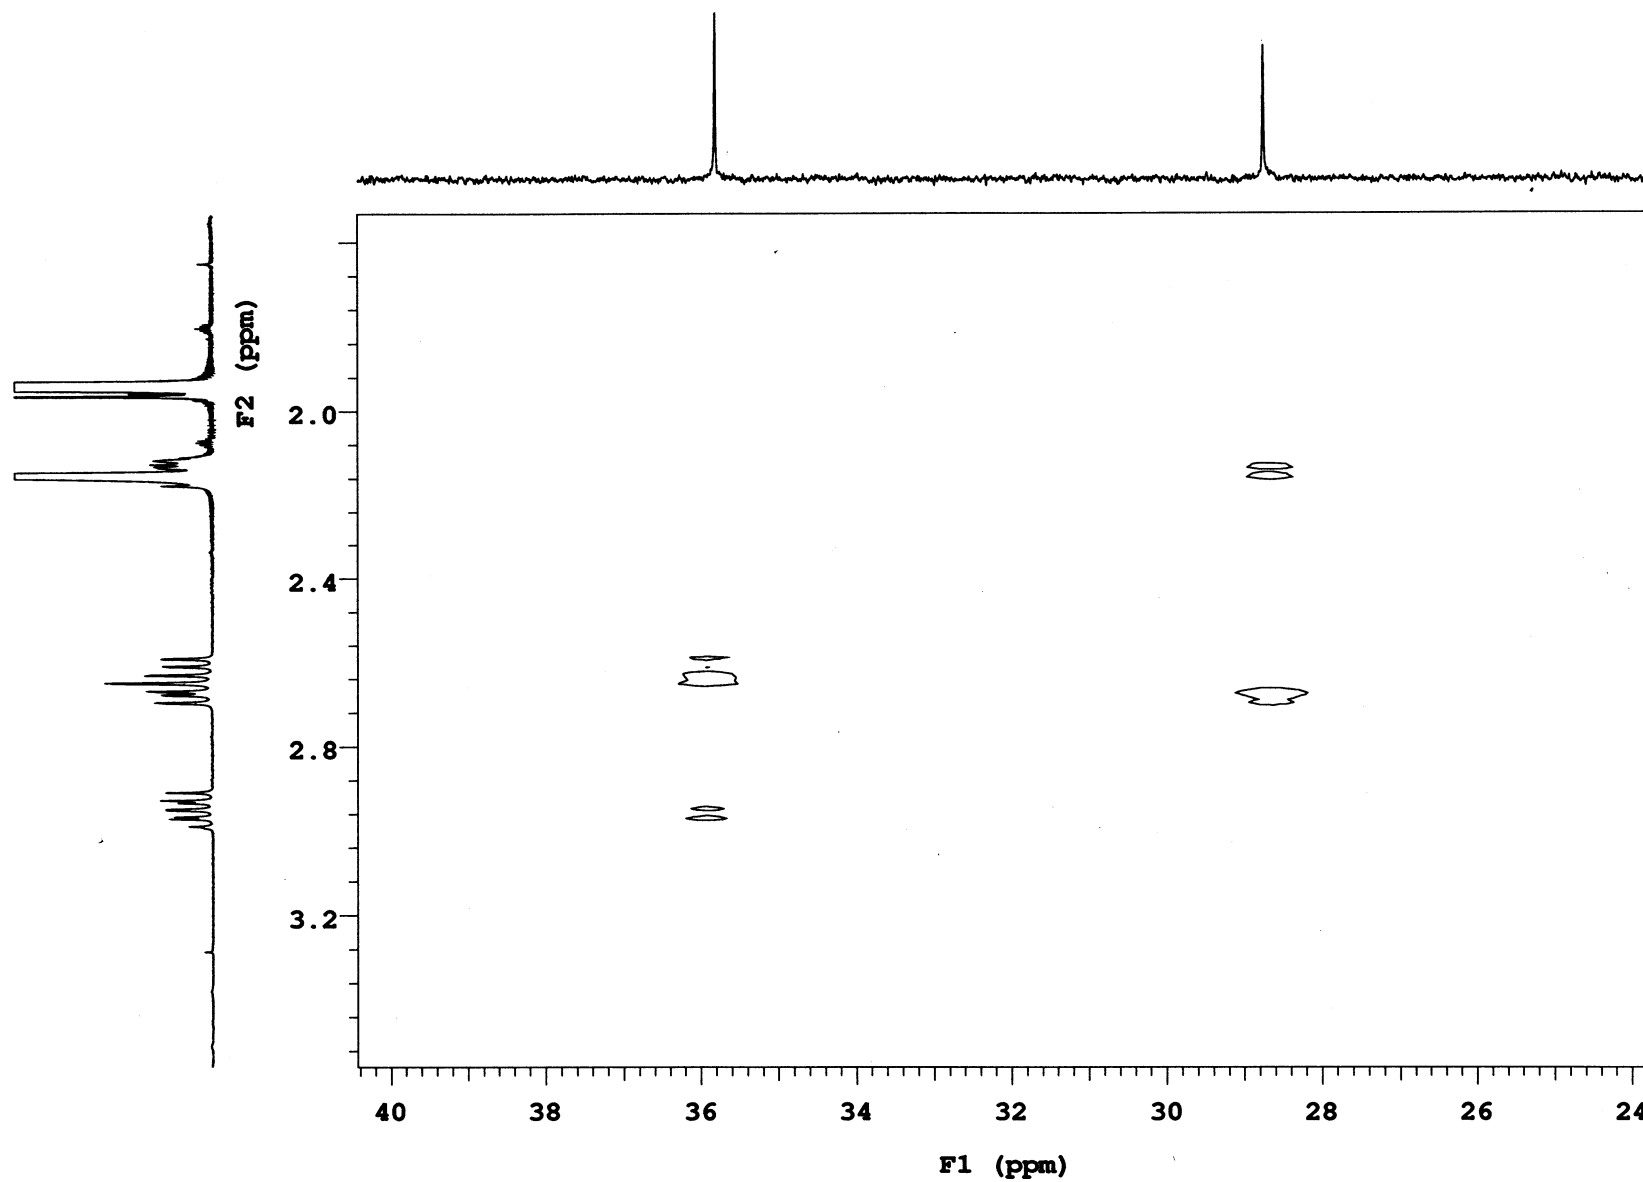

Fig S76. COSY of compound 5d.

CHP-8e-f2

Sample Name **CHP-8e-f2**  
Date collected **2016-05-12**

Pulse sequence **gCOSY**  
Solvent **cd3cn**

Temperature **25**  
Spectrometer **Agilent-NMR-inova500**

Study owner **vnmr2**  
Operator **vnmr2**

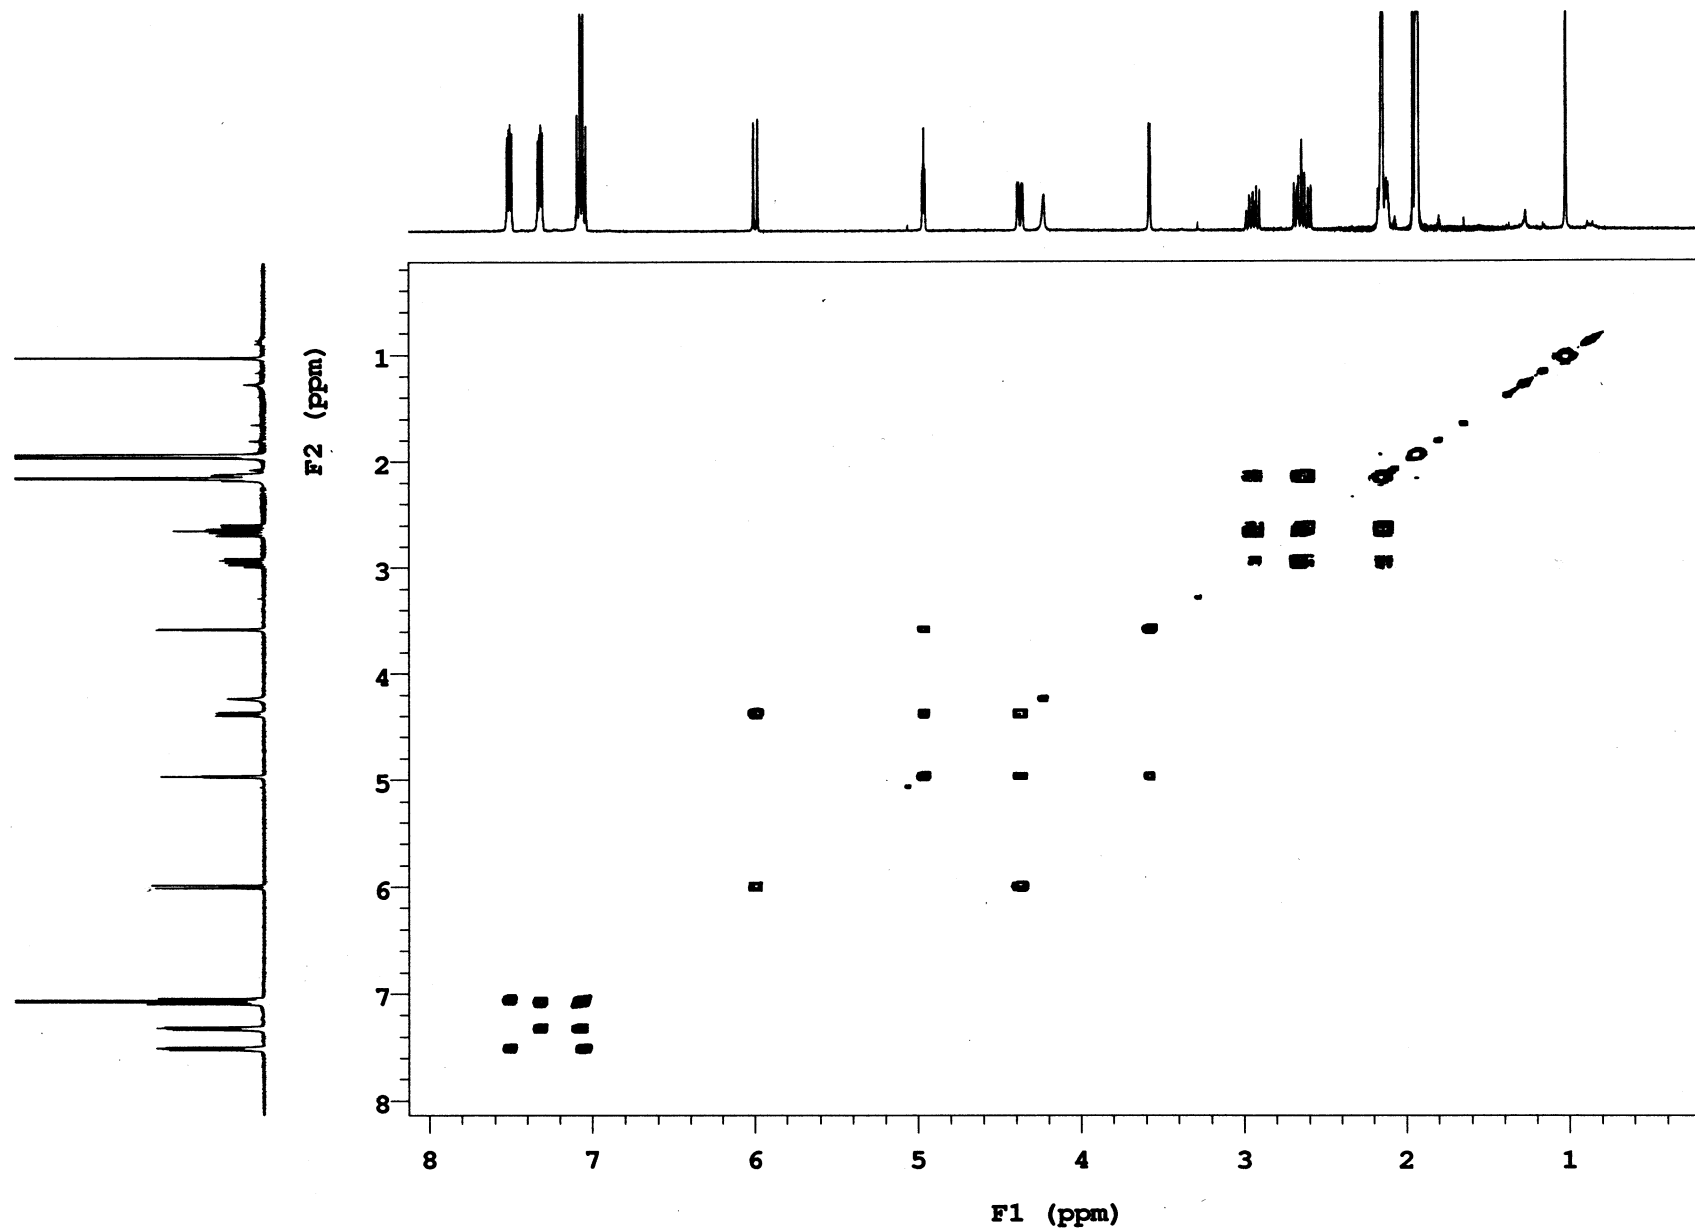





Fig S78. <sup>1</sup>H NMR (CD<sub>3</sub>CN, 500 MHz) of compound 3e.

CHP-8o

Sample Name **CHP-8o**  
Date collected **2016-05-27**

Pulse sequence **PROTON**  
Solvent **cd3cn**

Temperature **25**  
Spectrometer **Agilent-NMR-inova500**

Study owner **vnmr2**  
Operator **vnmr2**

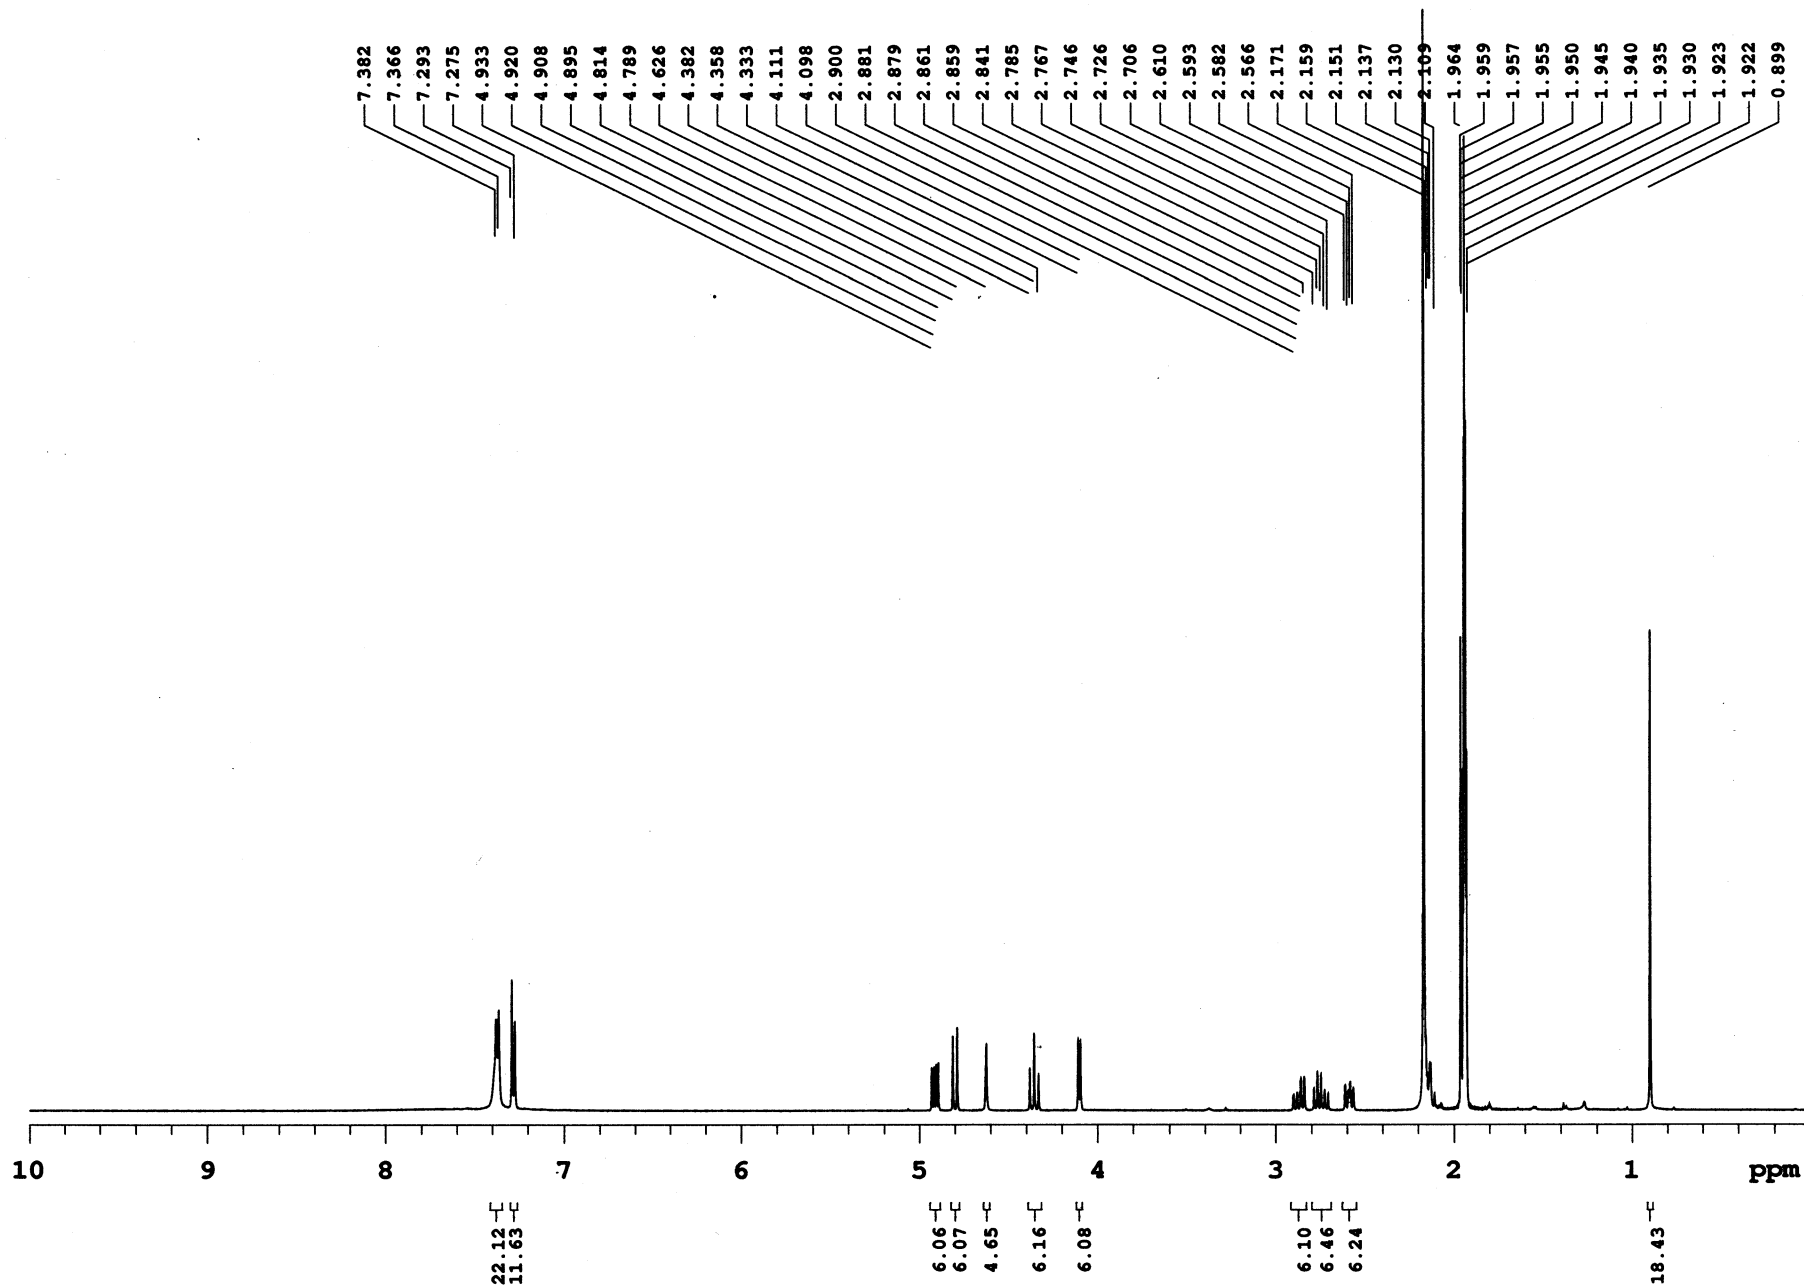

Fig S79. <sup>13</sup>C NMR (CD<sub>3</sub>CN, 125 MHz) of compound 3e.

CHP-80

Sample Name **CHP-80**  
Date collected **2016-05-01**

Pulse sequence **CARBON**  
Solvent **cd3cn**

Temperature **25**  
Spectrometer **Agilent-NMR-inova500**

Study owner **vnmr2**  
Operator **vnmr2**

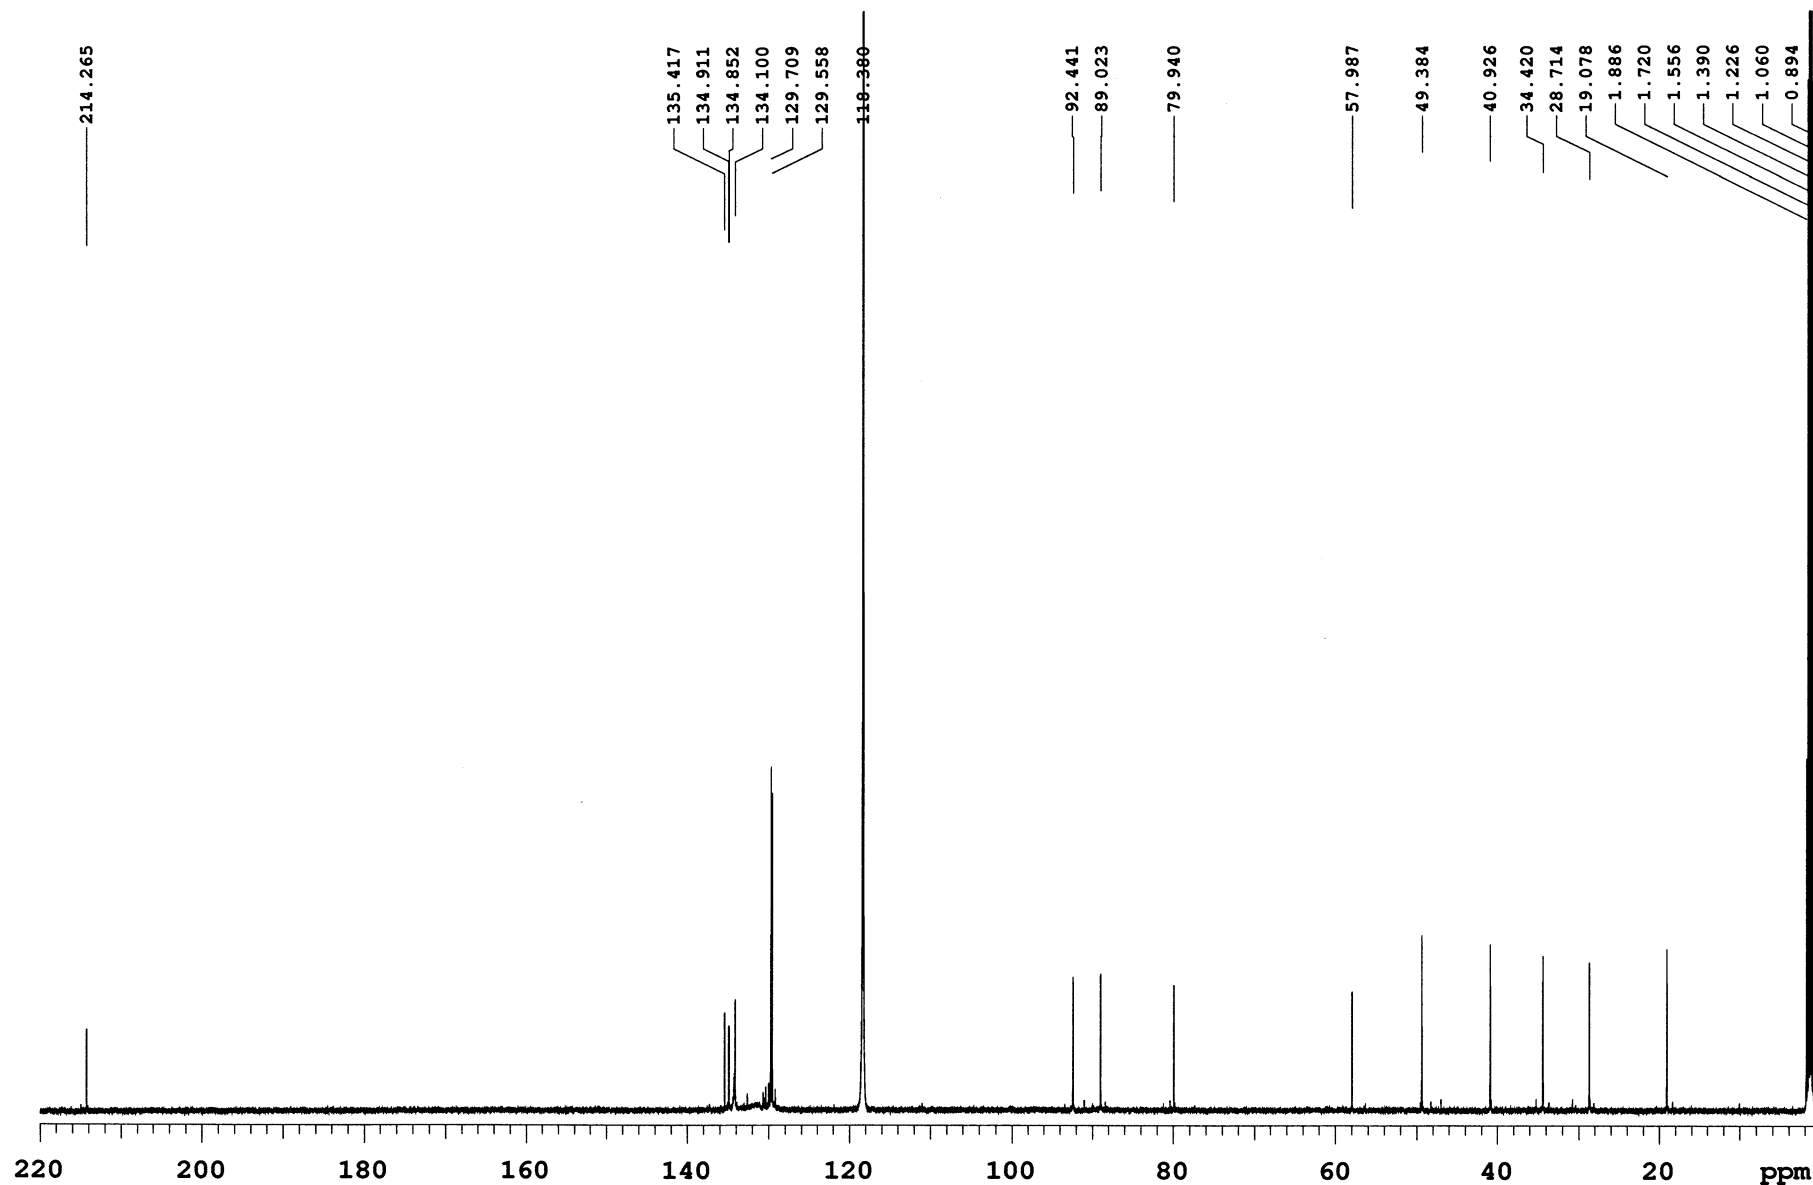

Fig S80. DEPT of compound 3e.

CHP-80

Sample Name **CHP-80**  
Date collected **2016-05-01**

Pulse sequence **DEPT**  
Solvent **cd3cn**

Temperature **25**  
Spectrometer **Agilent-NMR-inova500**

Study owner **vnmr2**  
Operator **vnmr2**

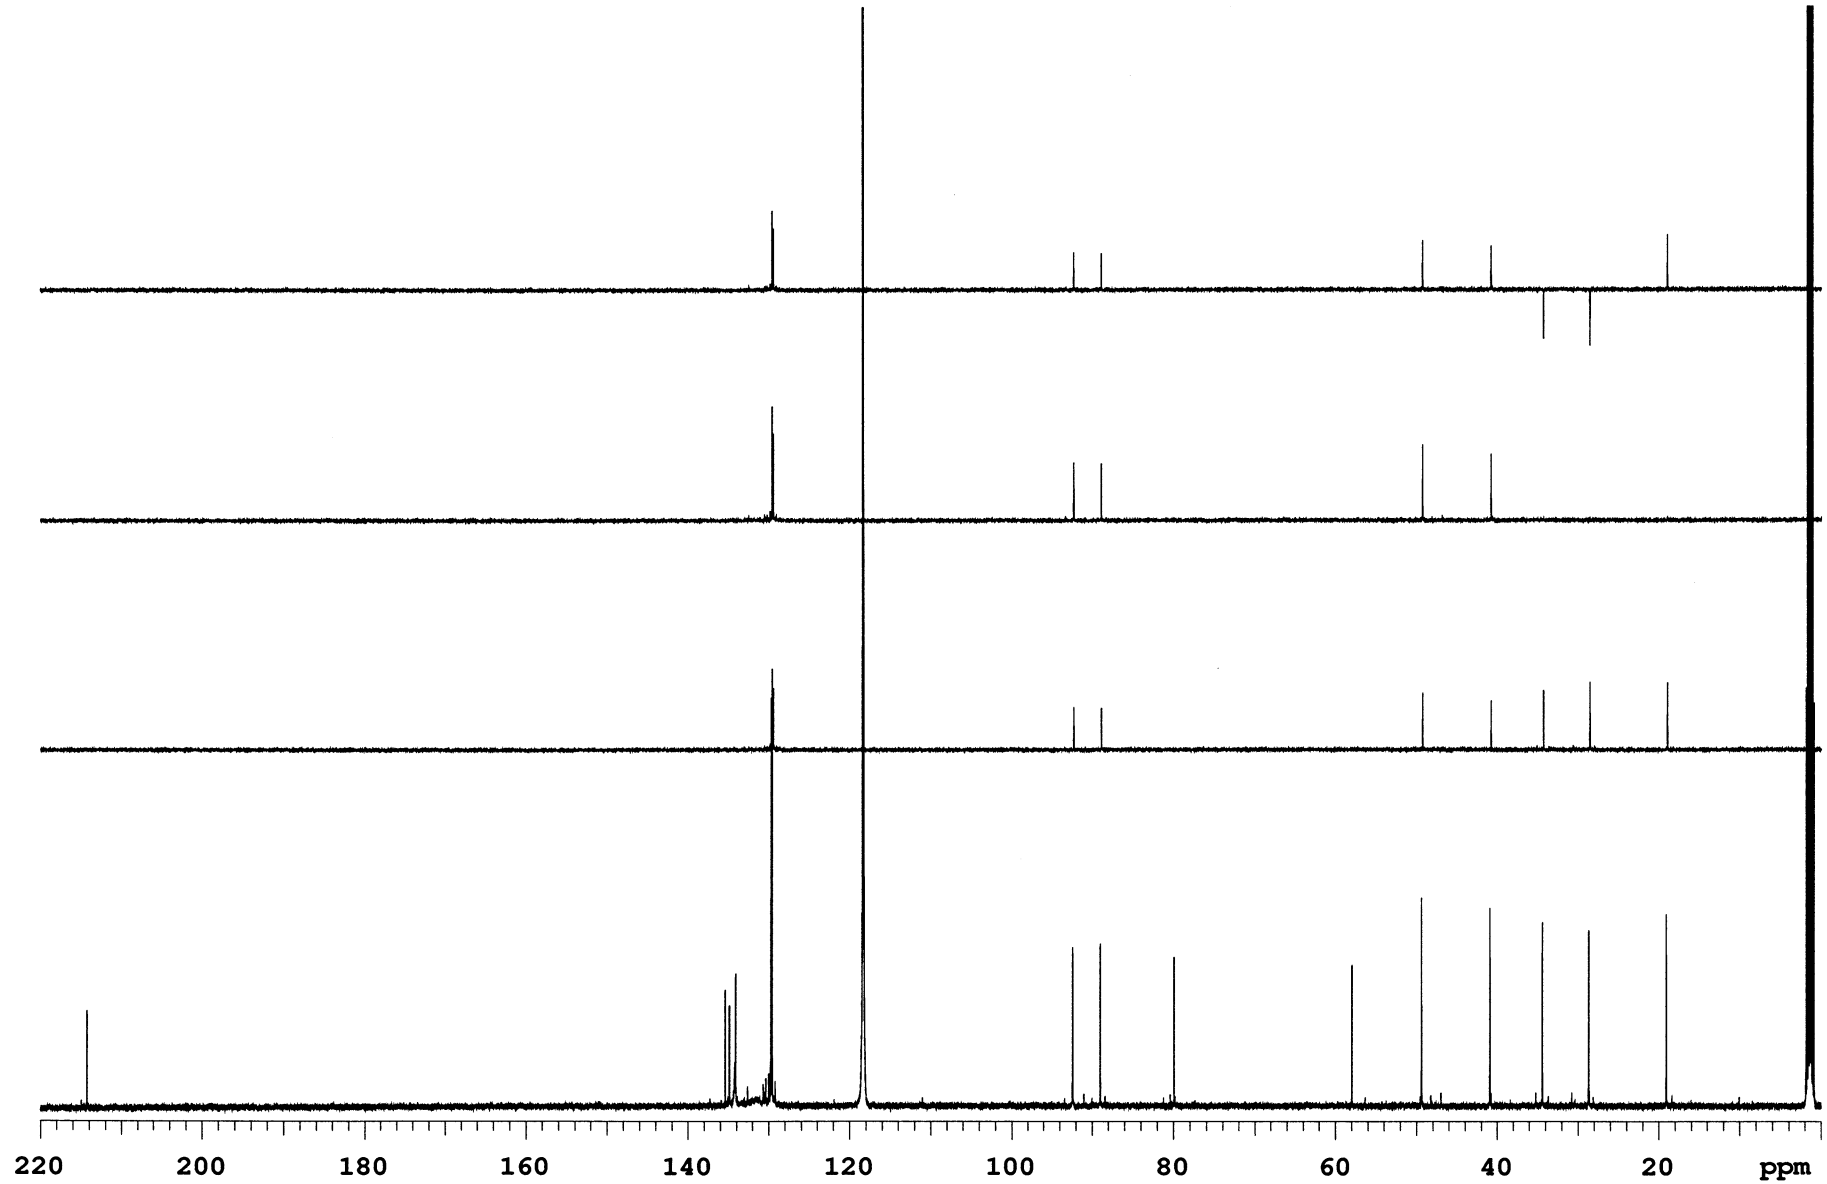

Fig S81. HSQC of compound 3e.

CHP-80

Sample Name **CHP-80**  
Date collected **2016-05-01**

Pulse sequence **gHSQC**  
Solvent **cd3cn**

Temperature **25**  
Spectrometer **Agilent-NMR-inova500**

Study owner **vnmr2**  
Operator **vnmr2**

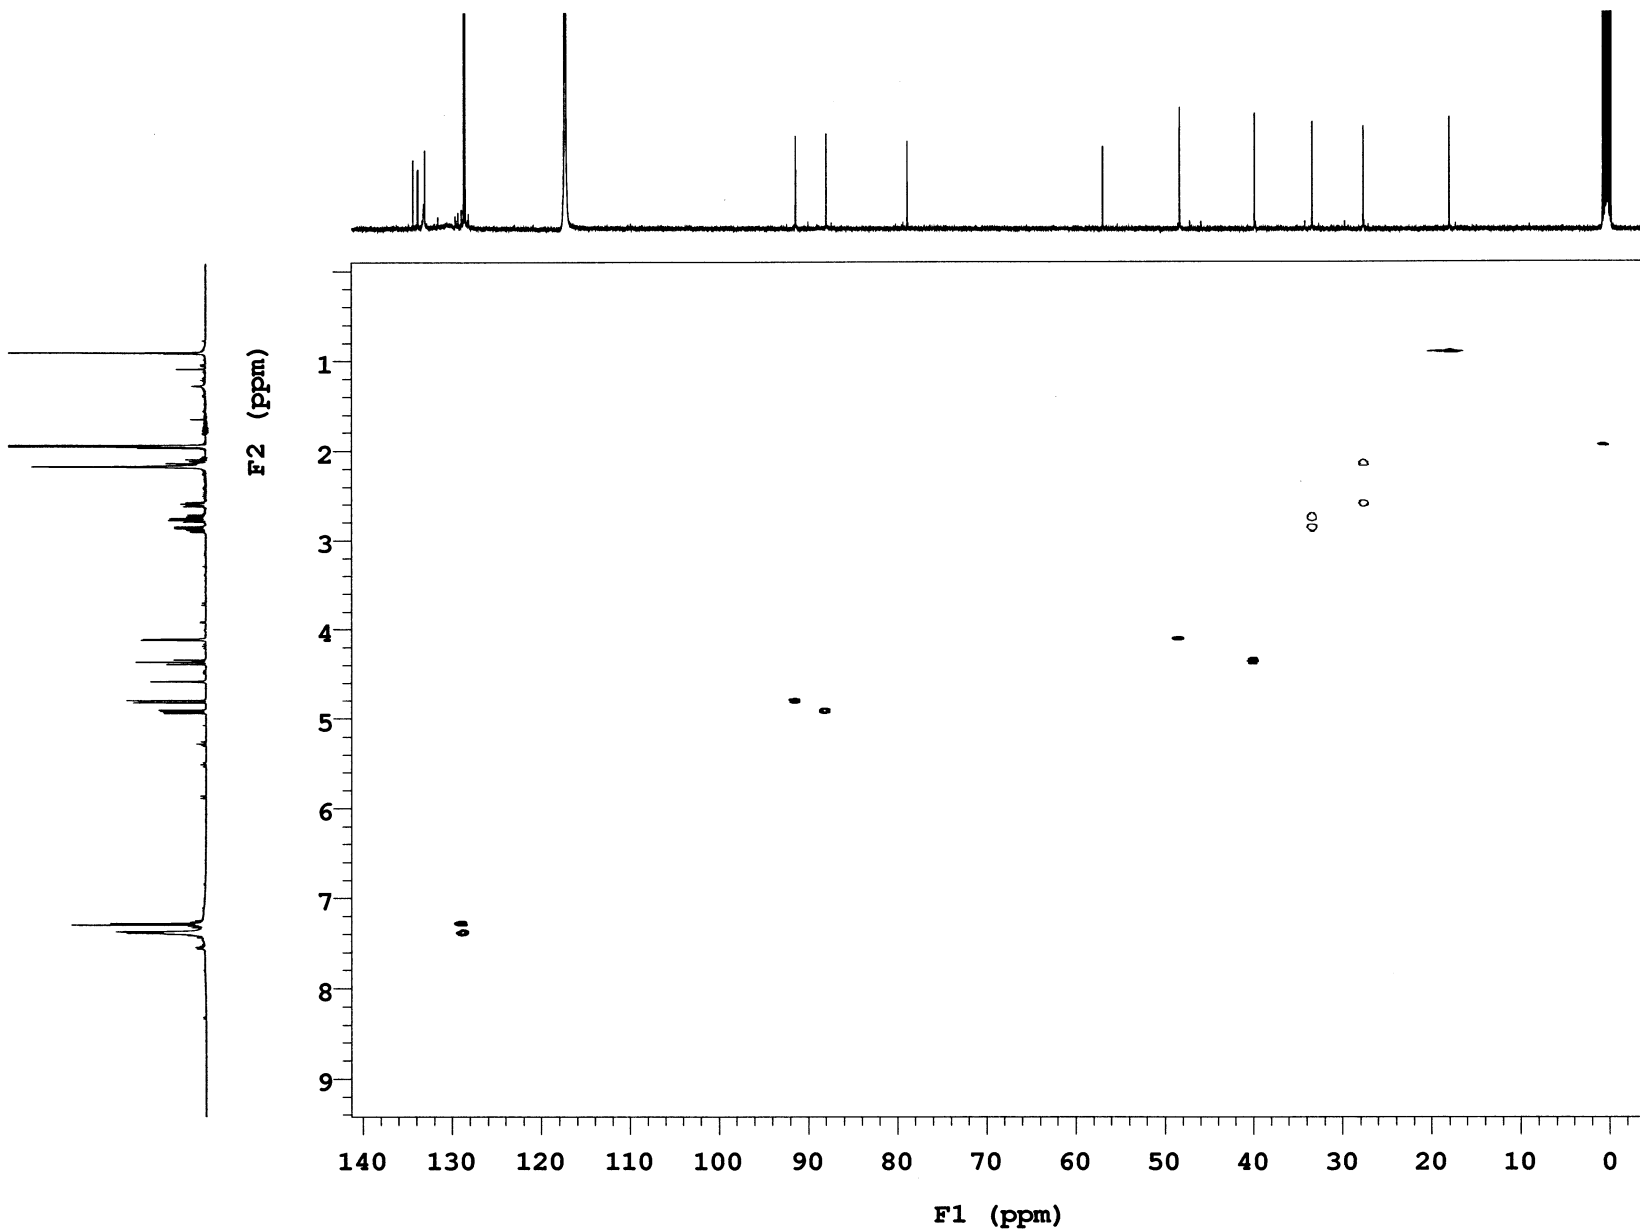

Fig S82. COSY of compound 3e.

CHP-80

Sample Name **CHP-80**  
Date collected **2016-05-01**

Pulse sequence **gCOSY**  
Solvent **cd3cn**

Temperature **25**  
Spectrometer **Agilent-NMR-inova500**

Study owner **vnmr2**  
Operator **vnmr2**

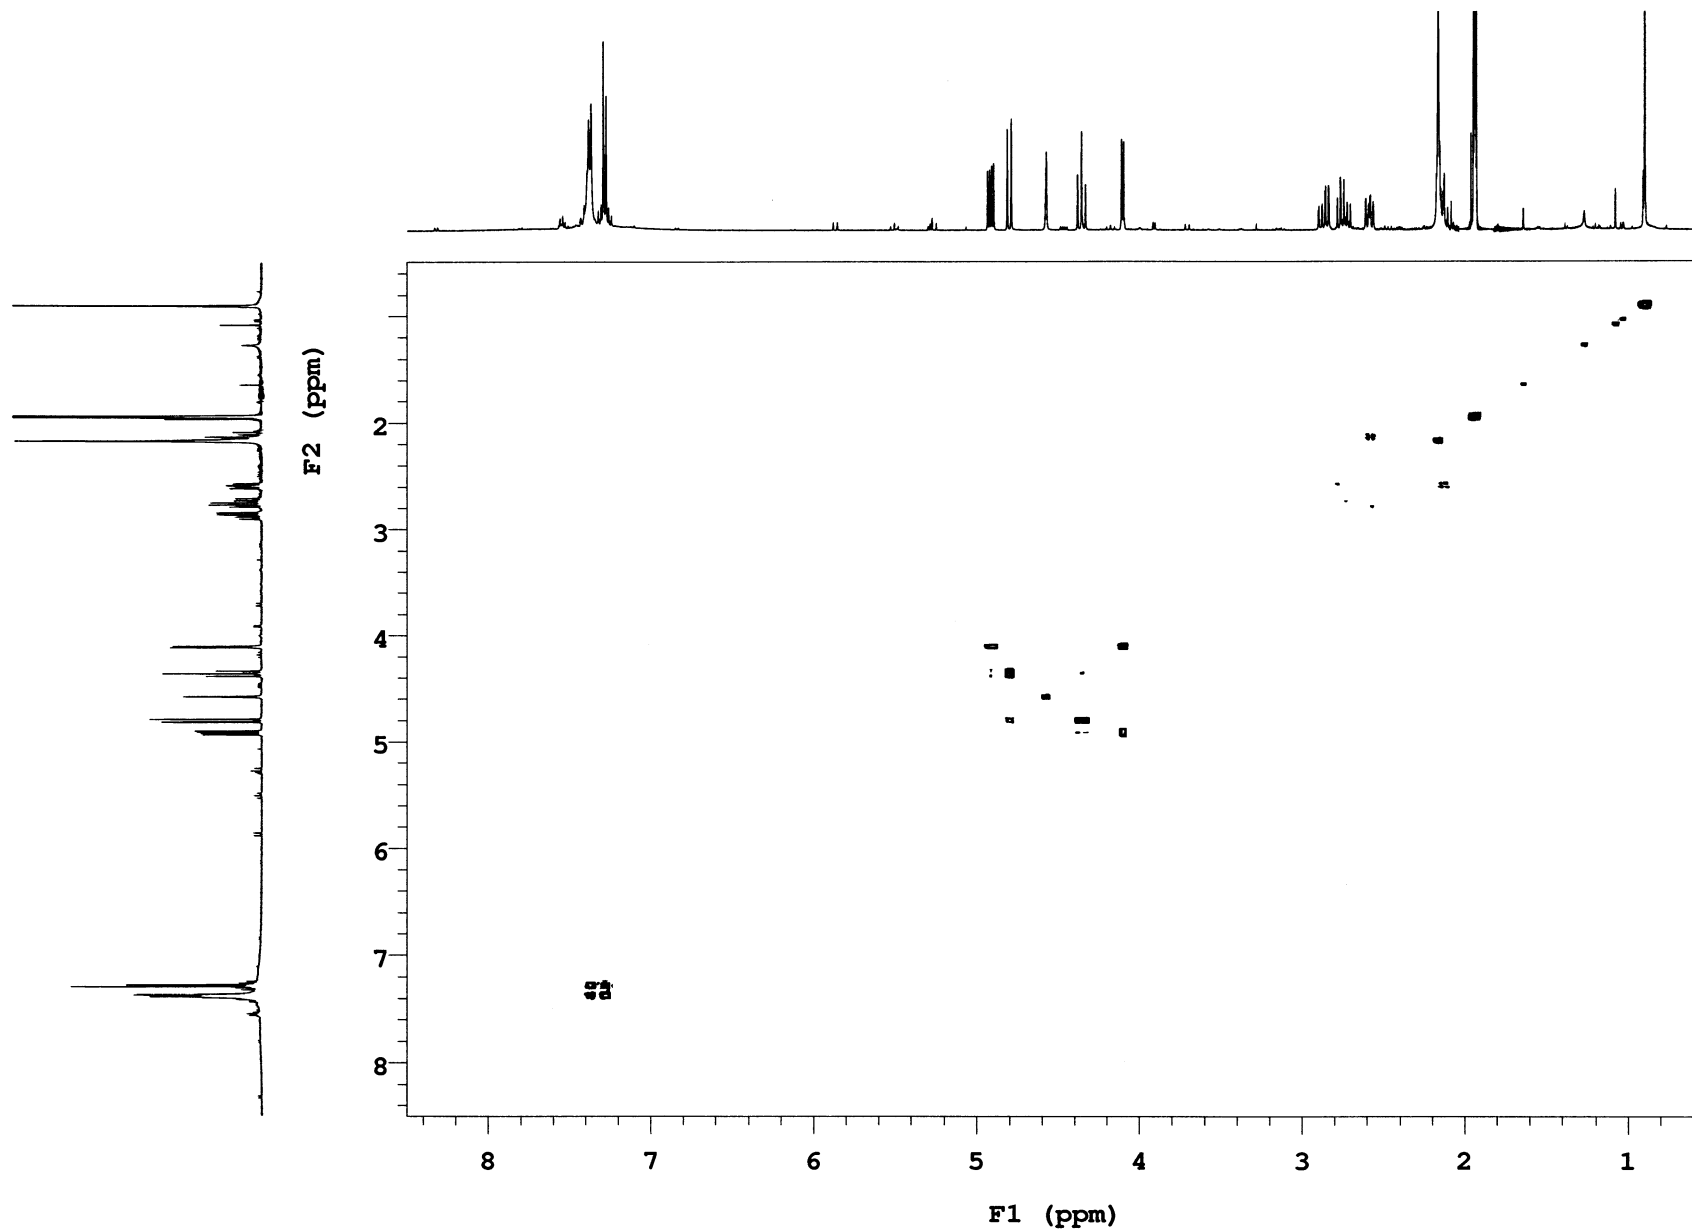

Fig S83. NOESY of compound 3e.

CHP-80

Sample Name **CHP-80**  
Date collected **2016-05-01**

Pulse sequence **NOESY**  
Solvent **cd3cn**

Temperature **25**  
Spectrometer **Agilent-NMR-inova500**

Study owner **vnmr2**  
Operator **vnmr2**

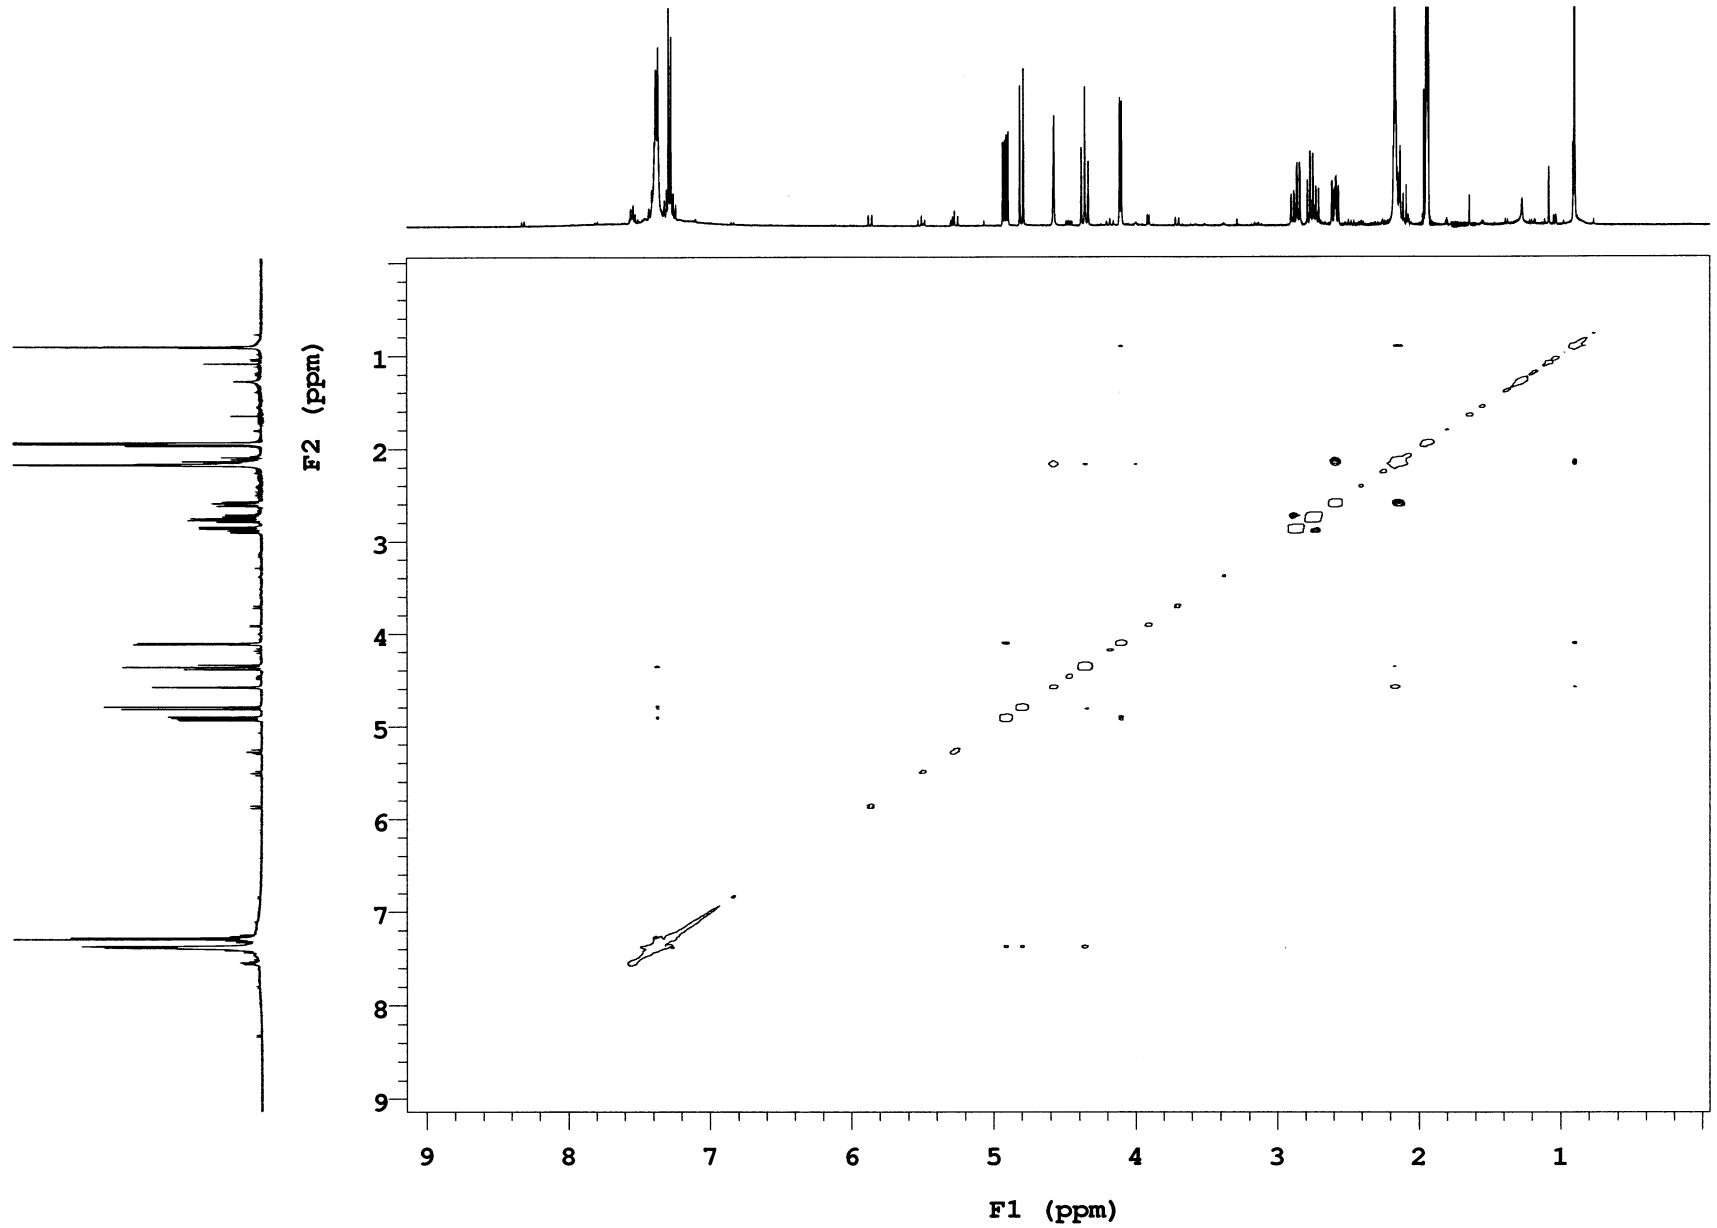

Fig S84. <sup>1</sup>H NMR (CD<sub>3</sub>CN, 500 MHz) of compound 5e.

CHP-8o-12

|                |            |                |        |              |                      |             |       |
|----------------|------------|----------------|--------|--------------|----------------------|-------------|-------|
| Sample Name    | CHP-8o-12  | Pulse sequence | PROTON | Temperature  | 25                   | Study owner | vnmr2 |
| Date collected | 2016-05-22 | Solvent        | cd3cn  | Spectrometer | Agilent-NMR-inova500 | Operator    | vnmr2 |

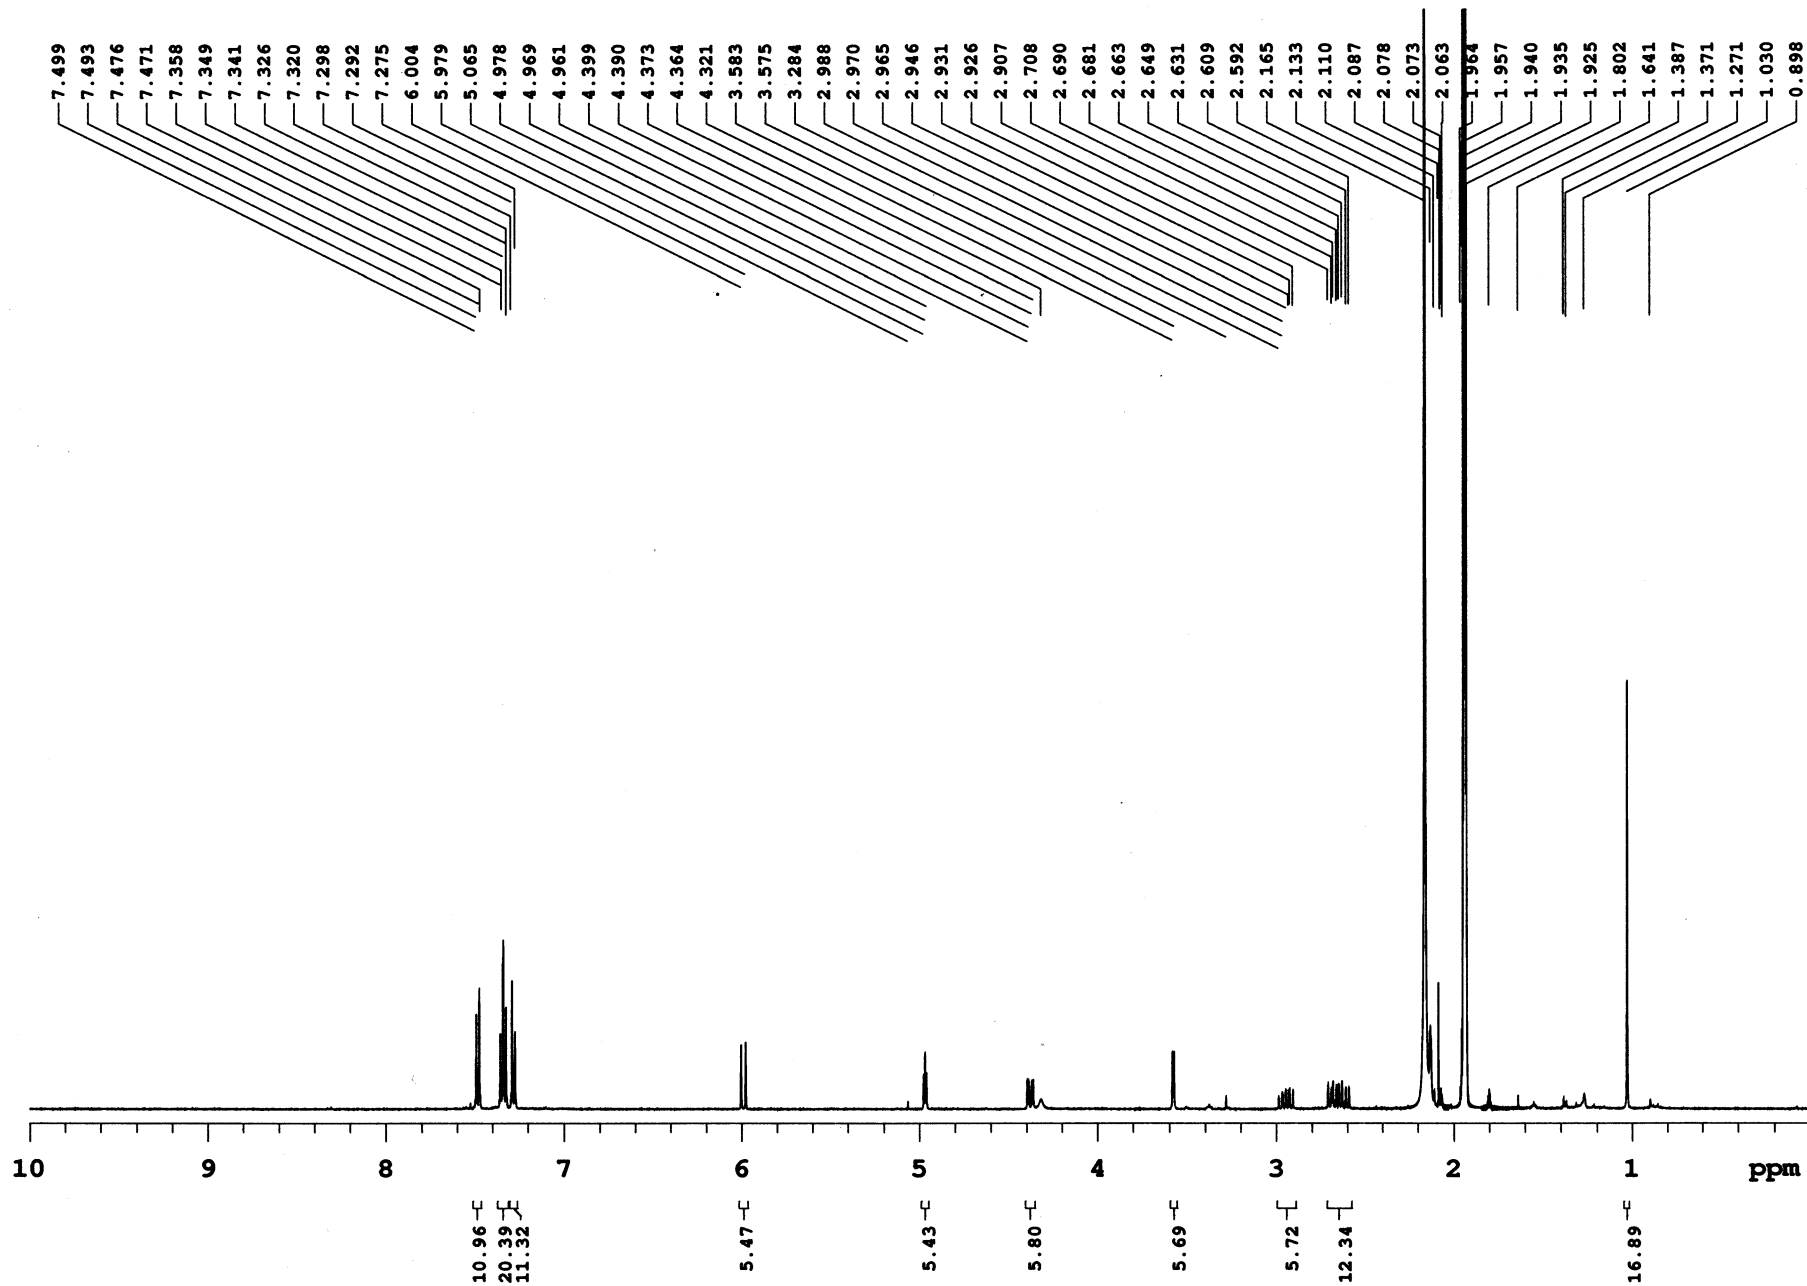



Fig S85. <sup>13</sup>C NMR (CD<sub>3</sub>CN, 125 MHz) of compound 5e.

CHP-8o-f2

Sample Name **CHP-8o-f2**  
Date collected **2016-05-22**

Pulse sequence **CARBON**  
Solvent **cd3cn**

Temperature **25**  
Spectrometer **Agilent-NMR-Inova500**

Study owner **vnmr2**  
Operator **vnmr2**

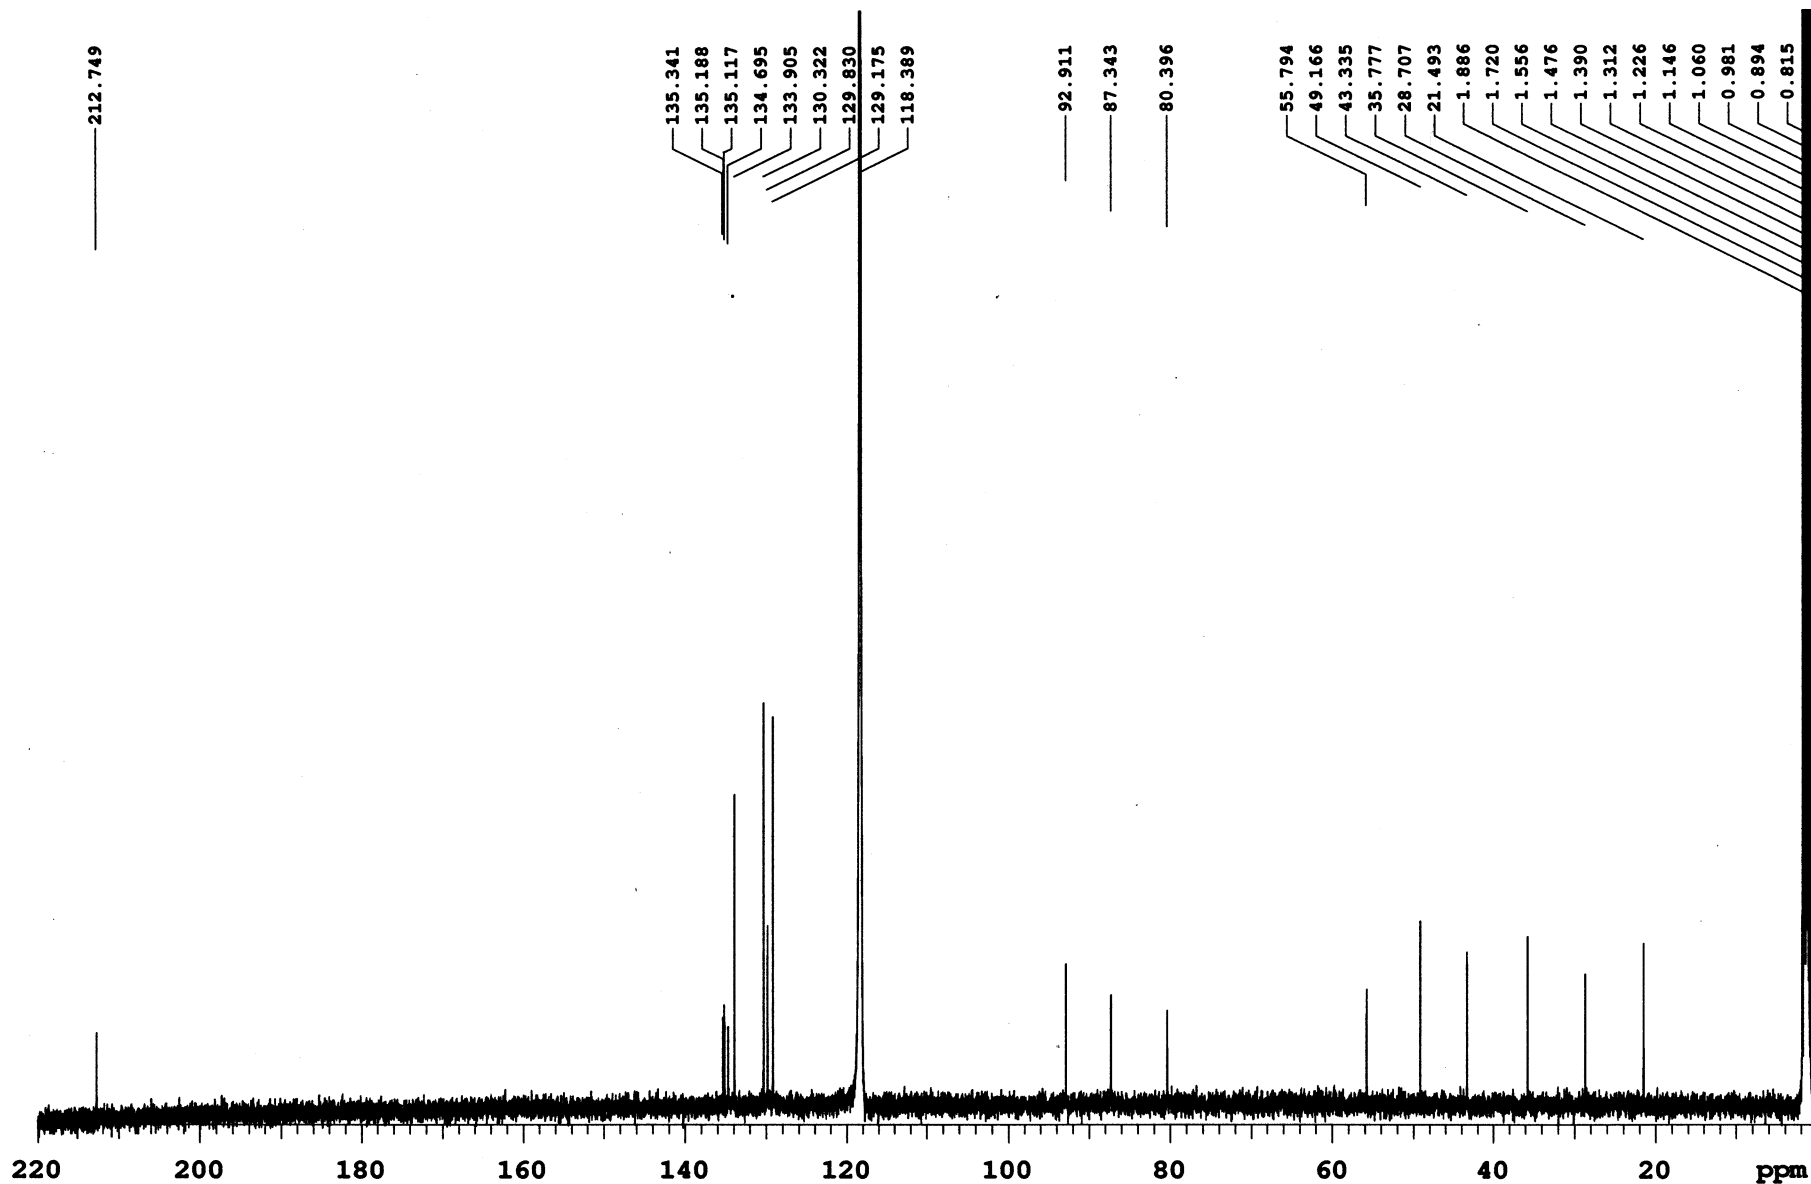

Fig S86. DEPT of compound 5e.

CHP-8o-f2

Sample Name **CHP-8o-f2**  
Date collected **2016-05-23**

Pulse sequence **DEPT**  
Solvent **cd3cn**

Temperature **25**  
Spectrometer **Agilent-NMR-inova500**

Study owner **vnmr2**  
Operator **vnmr2**

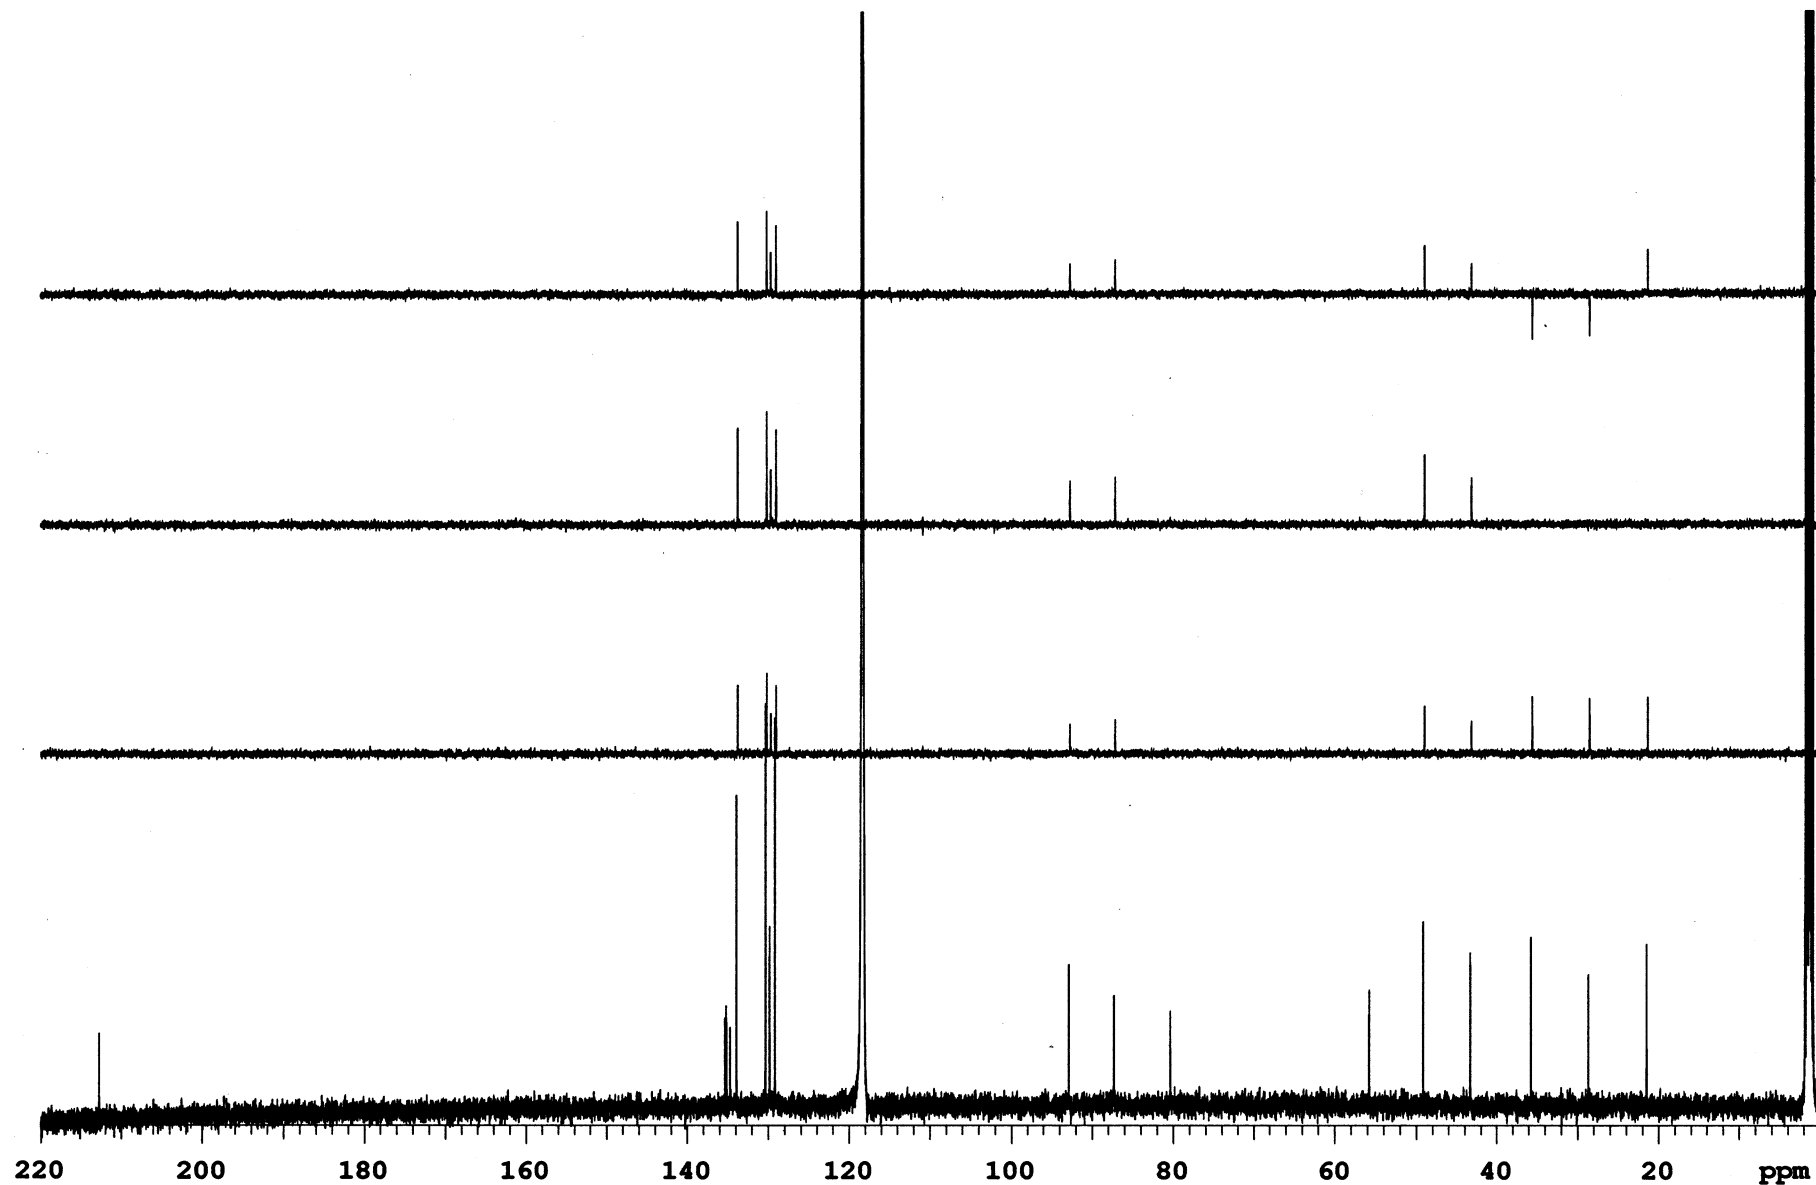

Fig S87. HSQC of compound 5e.

CHP-8o-f2

Sample Name **CHP-8o-f2**  
Date collected **2016-05-23**

Pulse sequence **gHSQC**  
Solvent **cd3cn**

Temperature **25**  
Spectrometer **Agilent-NMR-inova500**

Study owner **vnmr2**  
Operator **vnmr2**

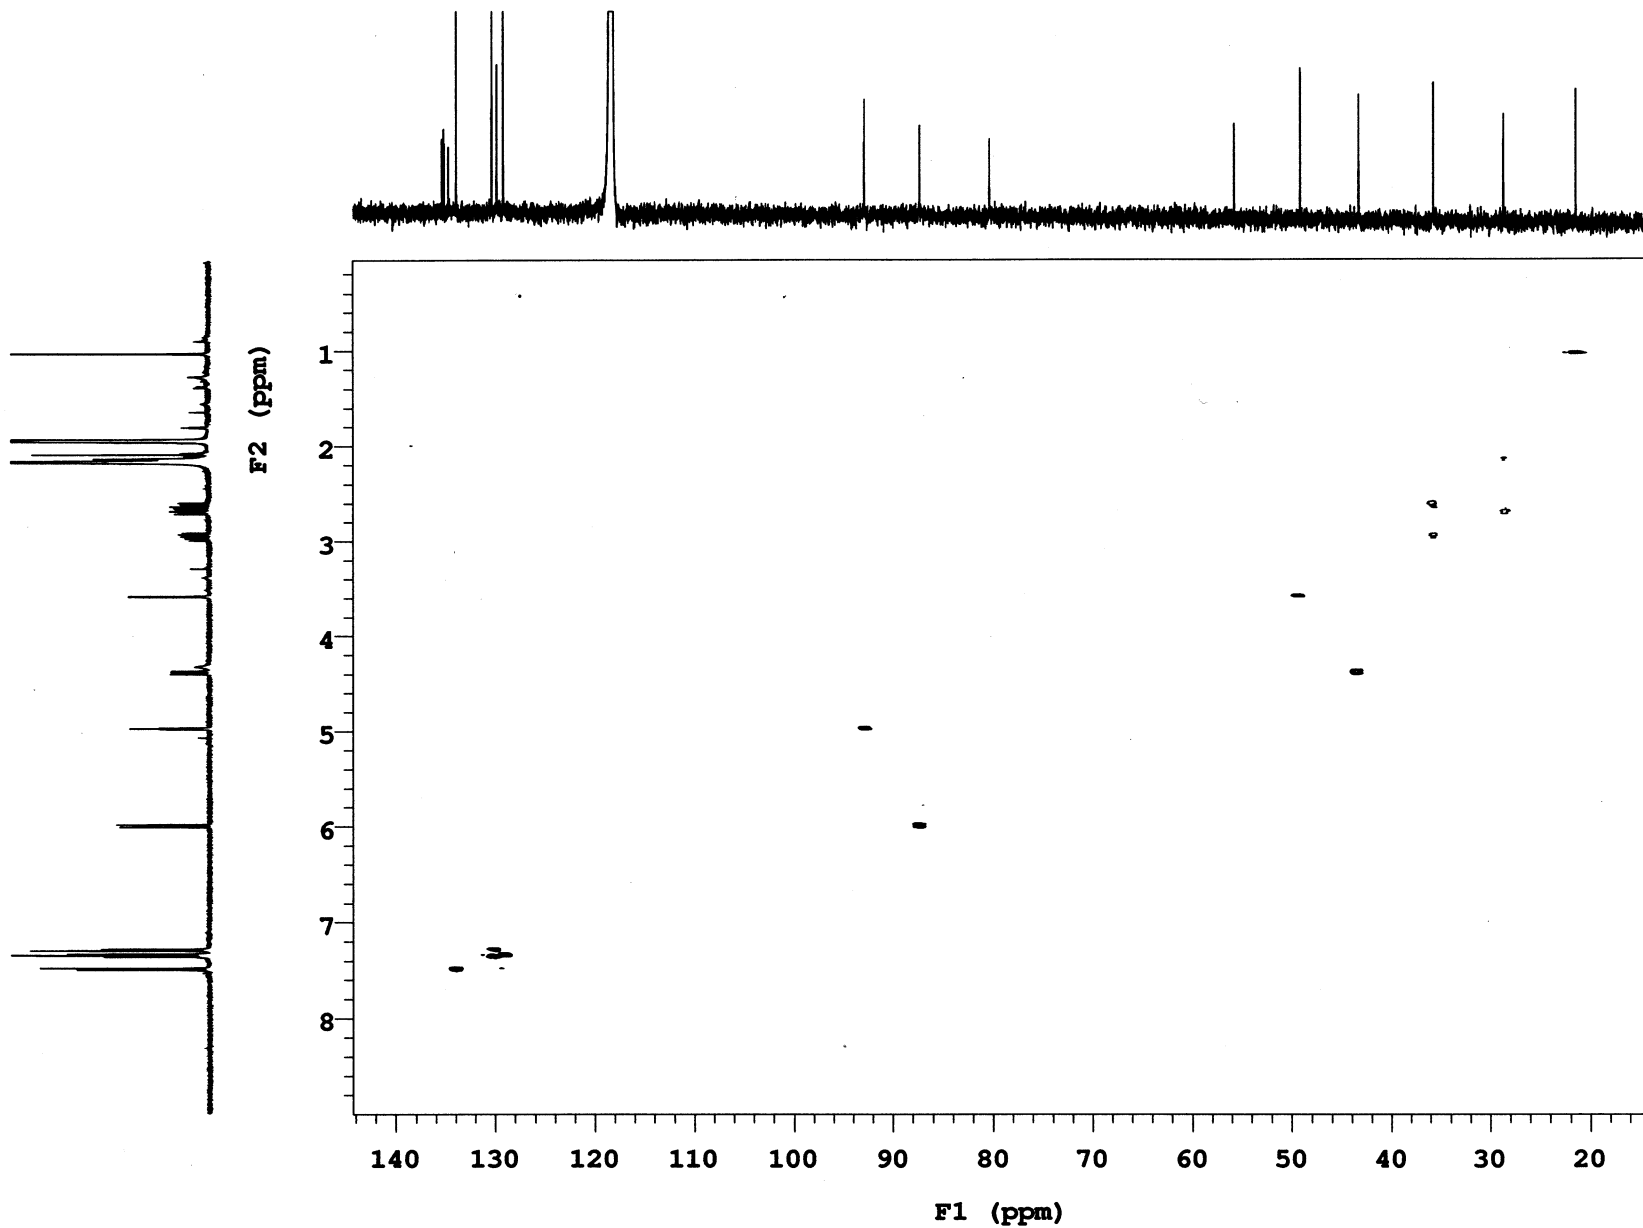

Fig S88. COSY of compound 5e.

CHP-8o-f2

Sample Name **CHP-8o-f2**  
Date collected **2016-05-23**

Pulse sequence **gCOSY**  
Solvent **cd3cn**

Temperature **25**  
Spectrometer **Agilent-NMR-inova500**

Study owner **vnmr2**  
Operator **vnmr2**

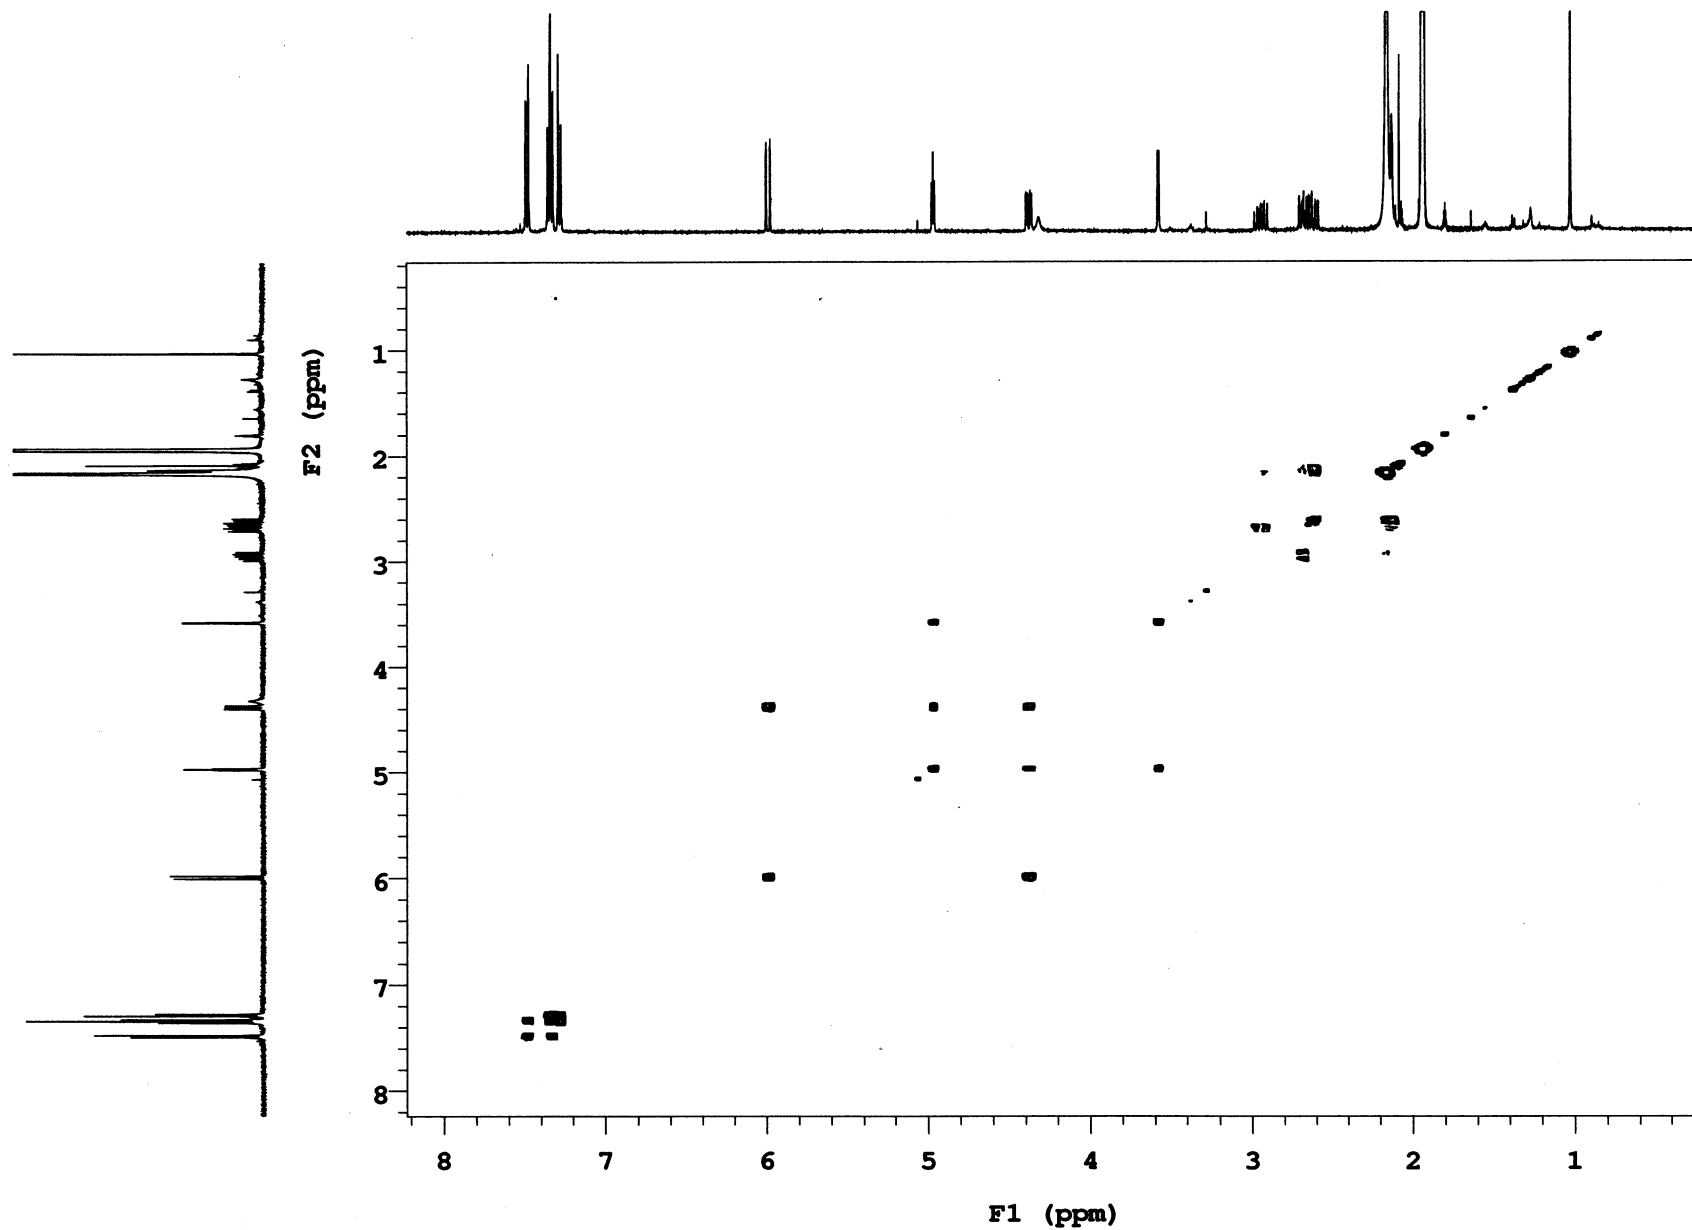

Fig S89. NOESY of compound 5e.

CHP-8o-f2

Sample Name **CHP-8o-f2**  
Date collected **2016-05-23**

Pulse sequence **NOESY**  
Solvent **cd3cn**

Temperature **25**  
Spectrometer **Agilent-NMR-inova500**

Study owner **vnmr2**  
Operator **vnmr2**

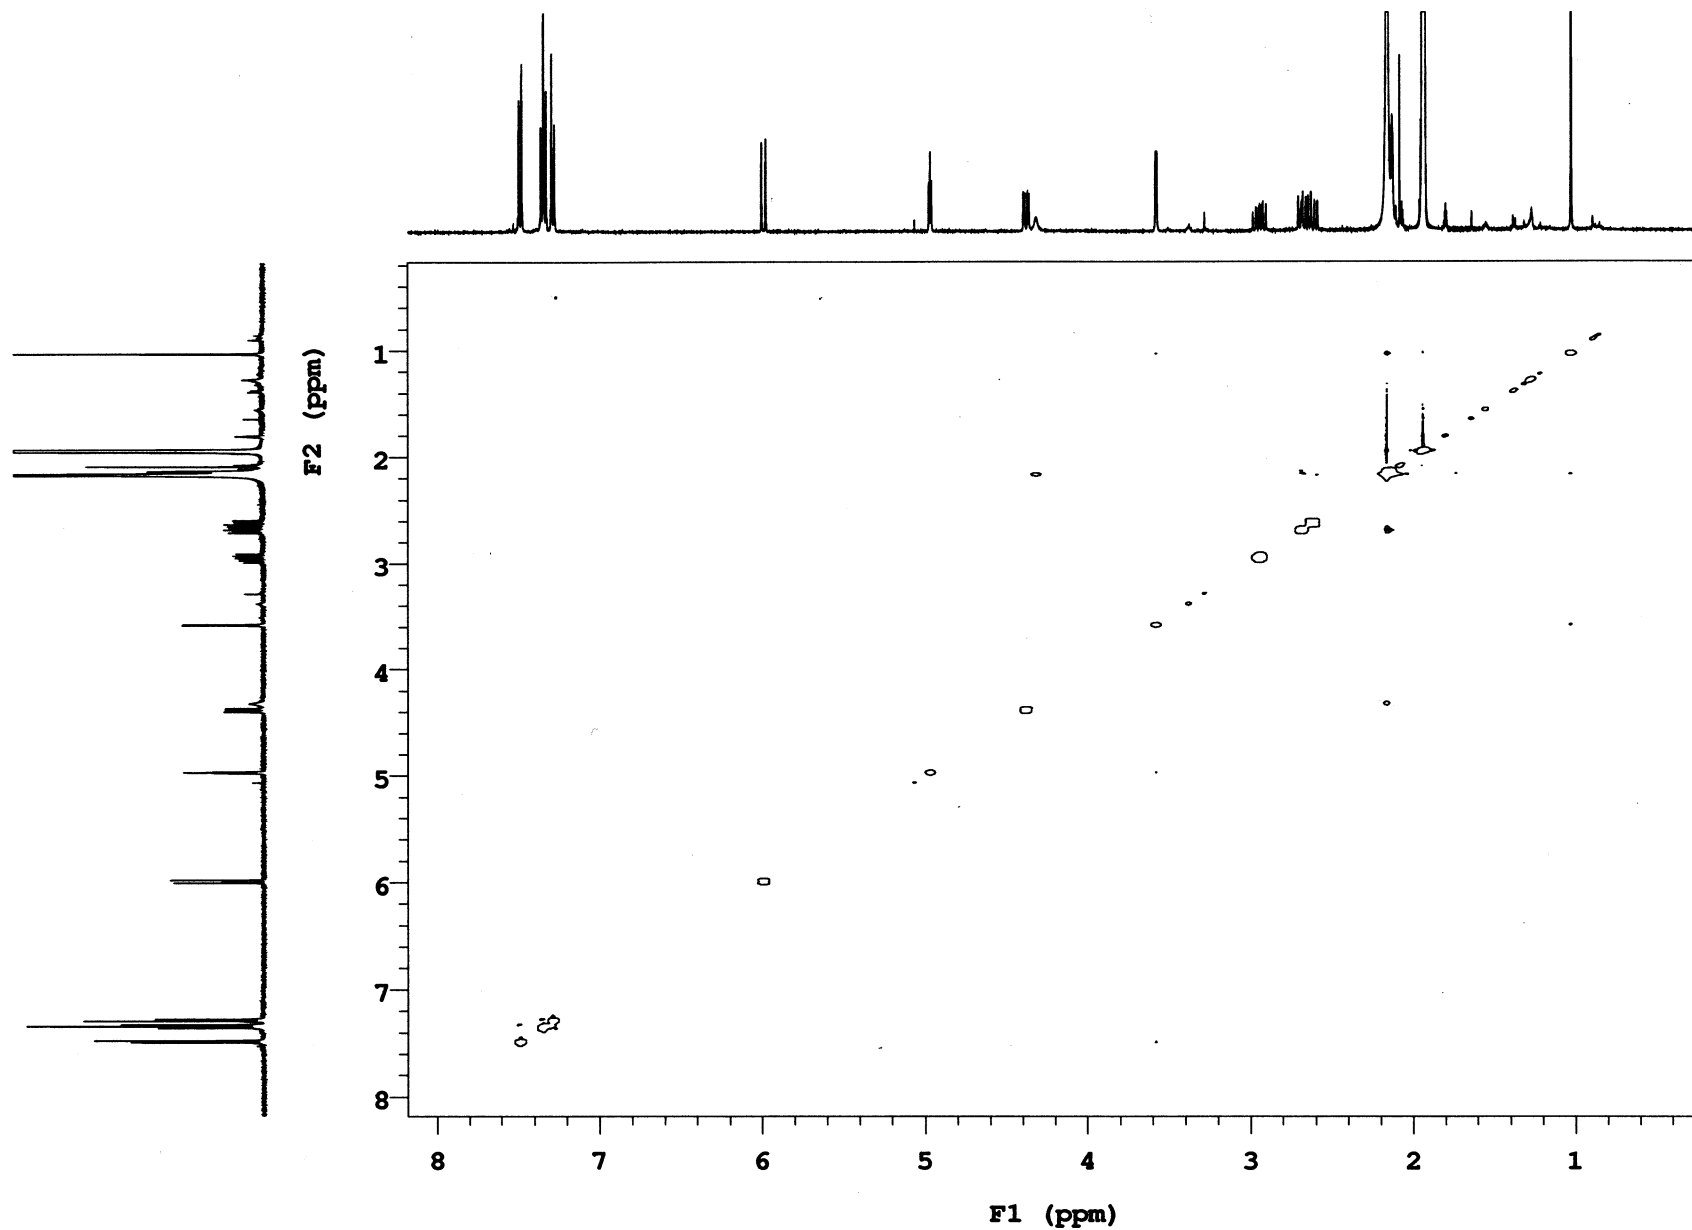

Fig S90. <sup>1</sup>H NMR (CDCl<sub>3</sub>, 500 MHz) of compound 3f.

CHP-8d

Sample Name **CHP-8d**  
Date collected **2016-05-10**

Pulse sequence **PROTON**  
Solvent **cdcl3**

Temperature **25**  
Spectrometer **Agilent-NMR-inova500**

Study owner **vnmr2**  
Operator **vnmr2**

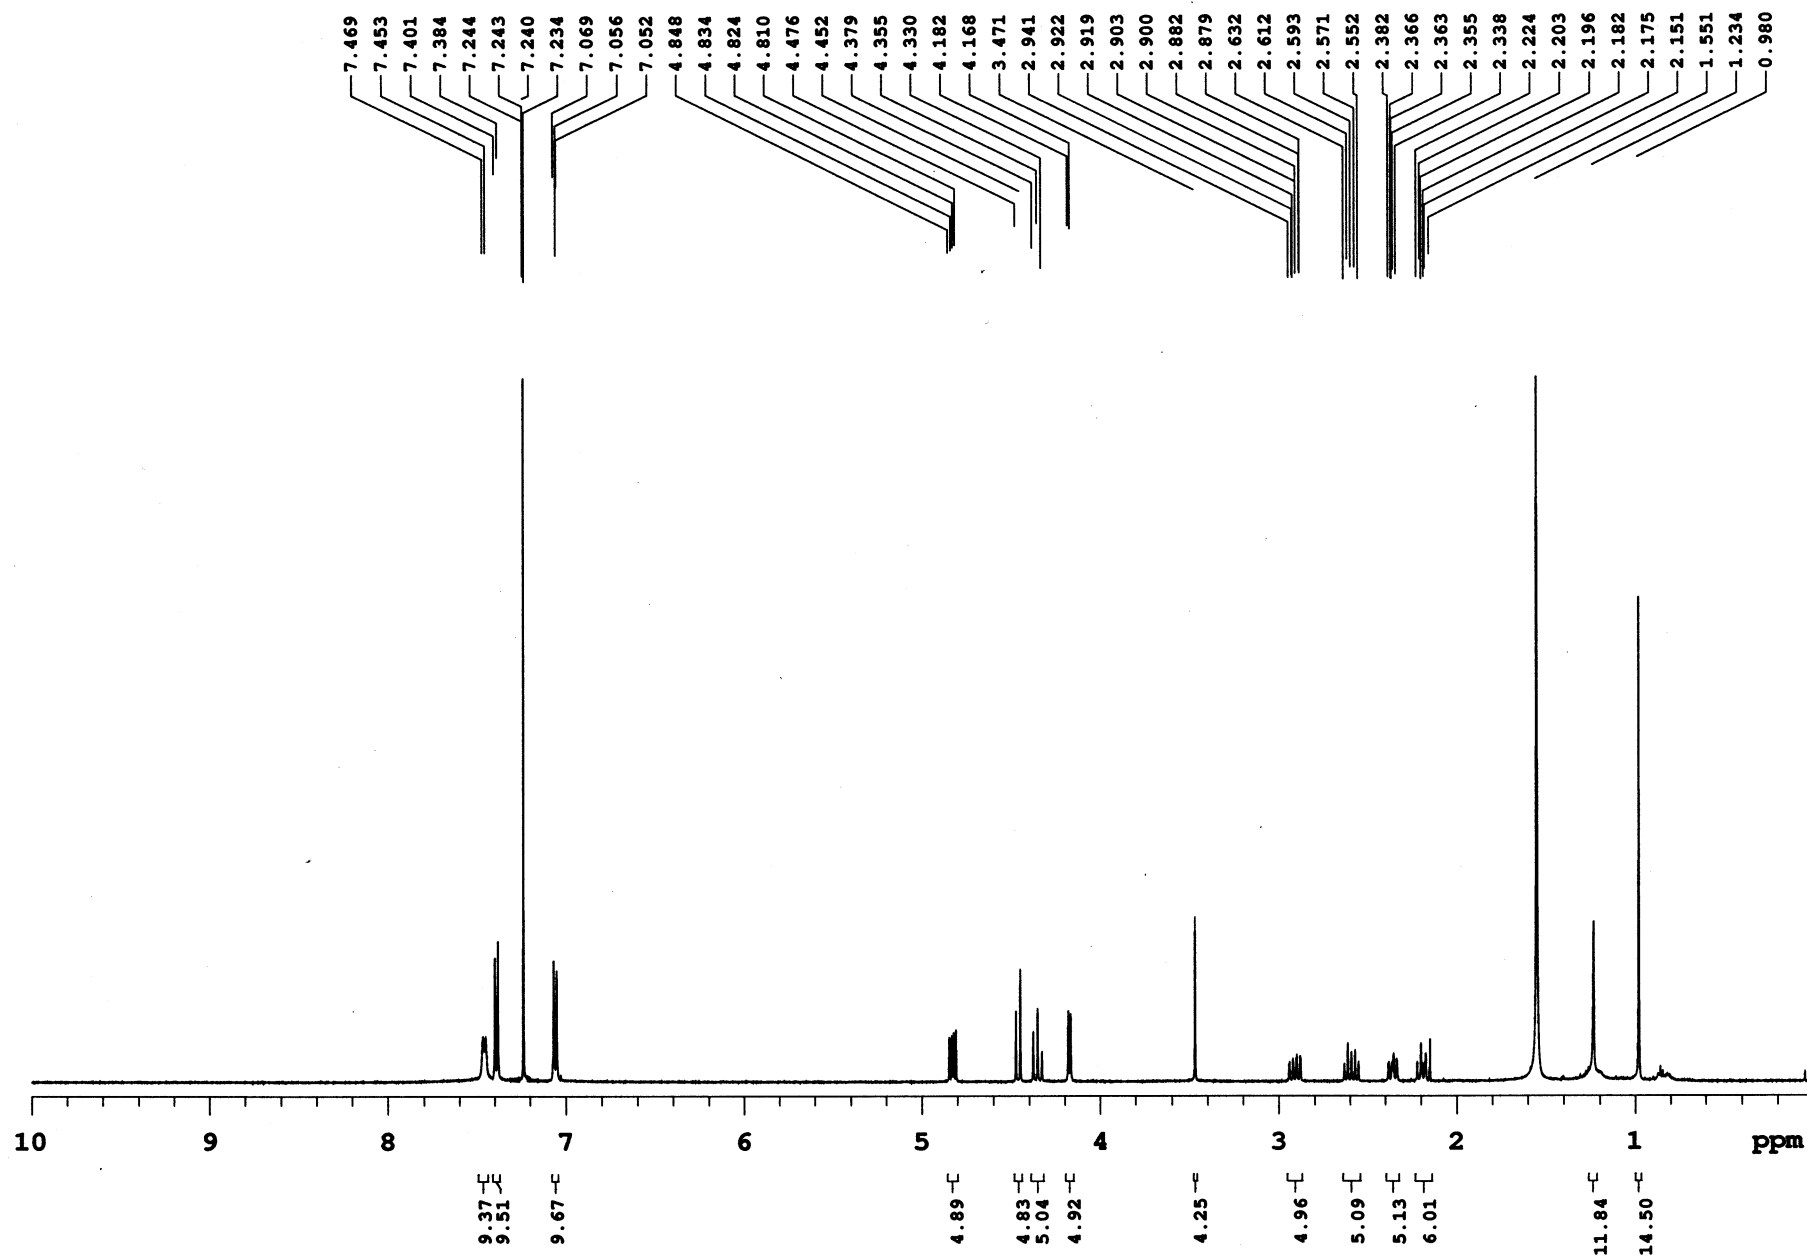

Fig S91. <sup>13</sup>C NMR (CDCl<sub>3</sub>, 125 MHz) of compound 3f.

CHP-8d

Sample Name **CHP-8d** Pulse sequence **CARBON** Temperature **25** Study owner **vnmr2**  
Date collected **2016-03-27** Solvent **cdcl3** Spectrometer **Agilent-NMR-inova500** Operator **vnmr2**

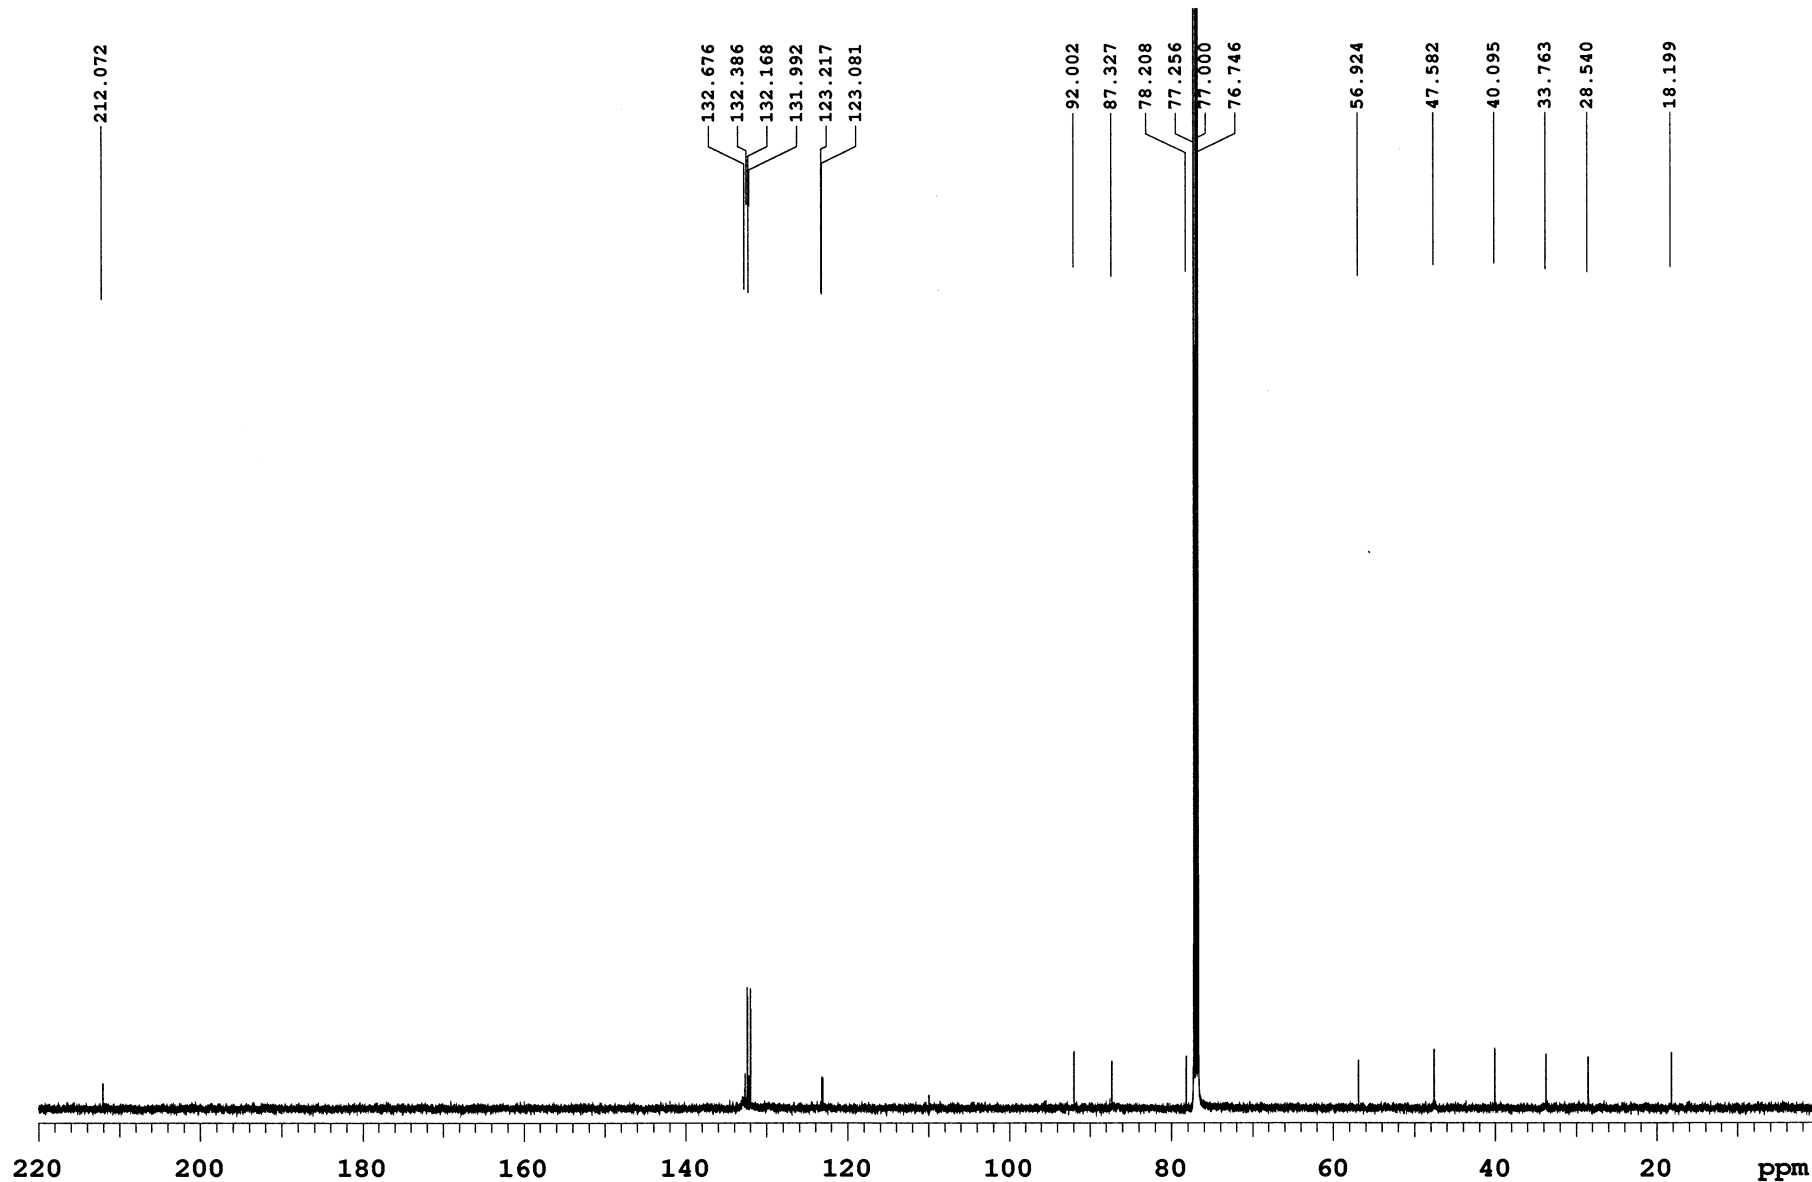

Fig S92. DEPT of compound 3f.

CHP-8d

Sample Name **CHP-8d**  
Date collected **2016-03-27**

Pulse sequence **DEPT**  
Solvent **cdcl3**

Temperature **25**  
Spectrometer **Agilent-NMR-inova500**

Study owner **vnmr2**  
Operator **vnmr2**

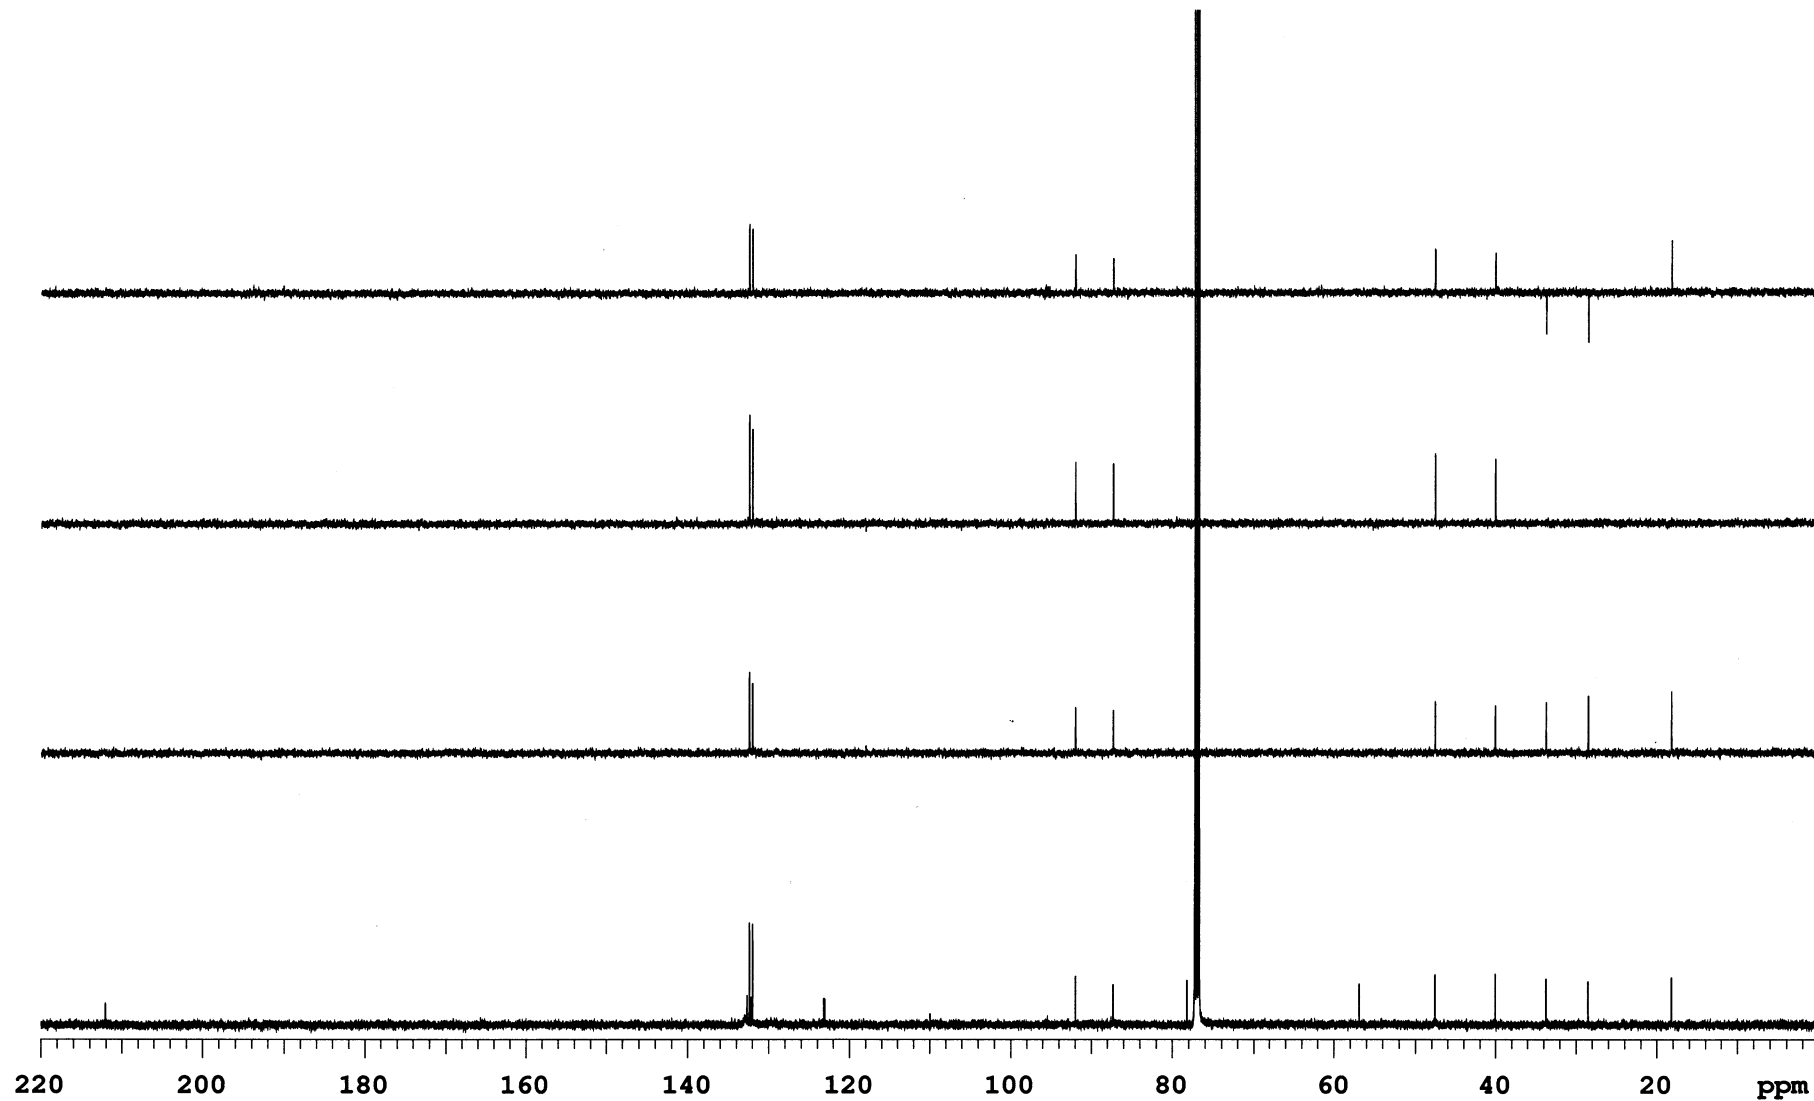



Fig S93. HSQC of compound 3f.

CHP-8d

Sample Name **CHP-8d**  
Date collected **2016-05-10**

Pulse sequence **gHSQC**  
Solvent **cdcl3**

Temperature **25**  
Spectrometer **Agilent-NMR-inova500**

Study owner **vnmr2**  
Operator **vnmr2**

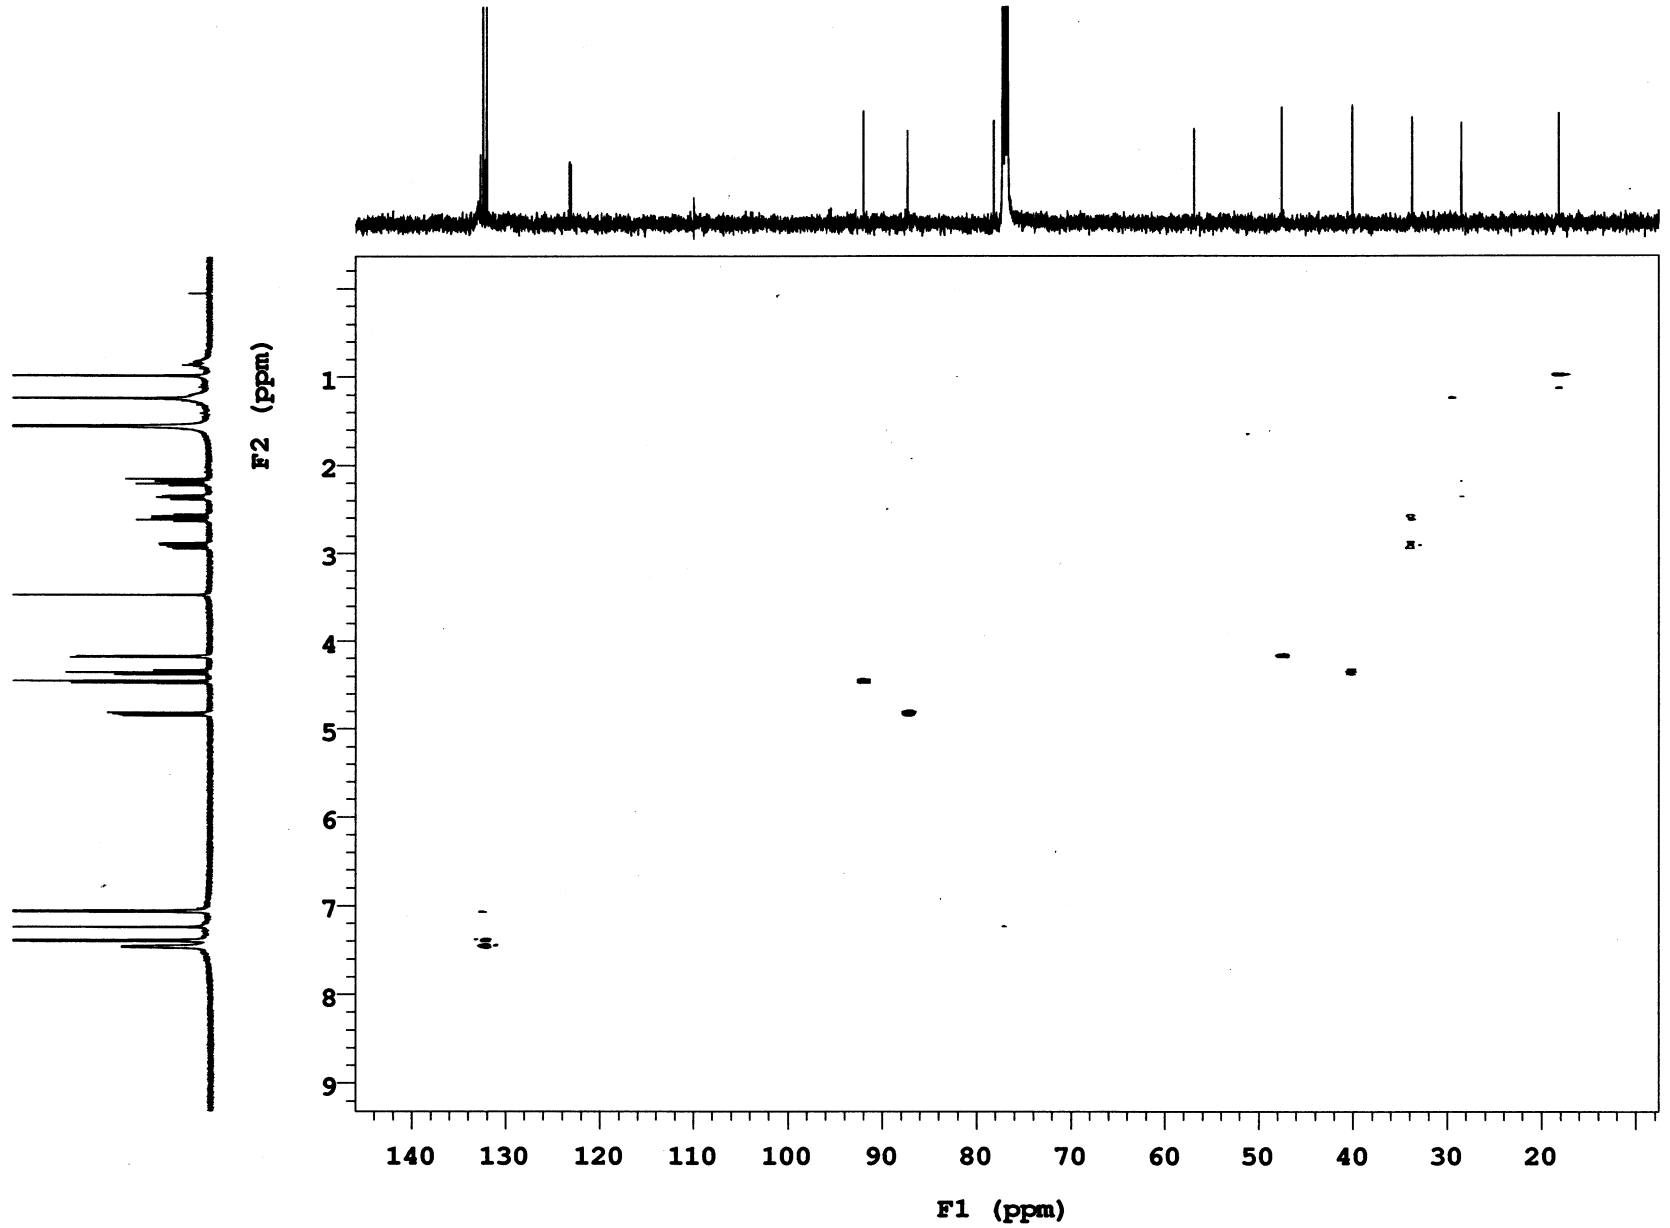

## CHP-8d

Sample Name **CHP-8d**  
Date collected **2016-03-27**Pulse sequence **gCOSY**  
Solvent **cdcl3**Temperature **25**  
Spectrometer **Agilent-NMR-inova500**Study owner **vnmr2**  
Operator **vnmr2**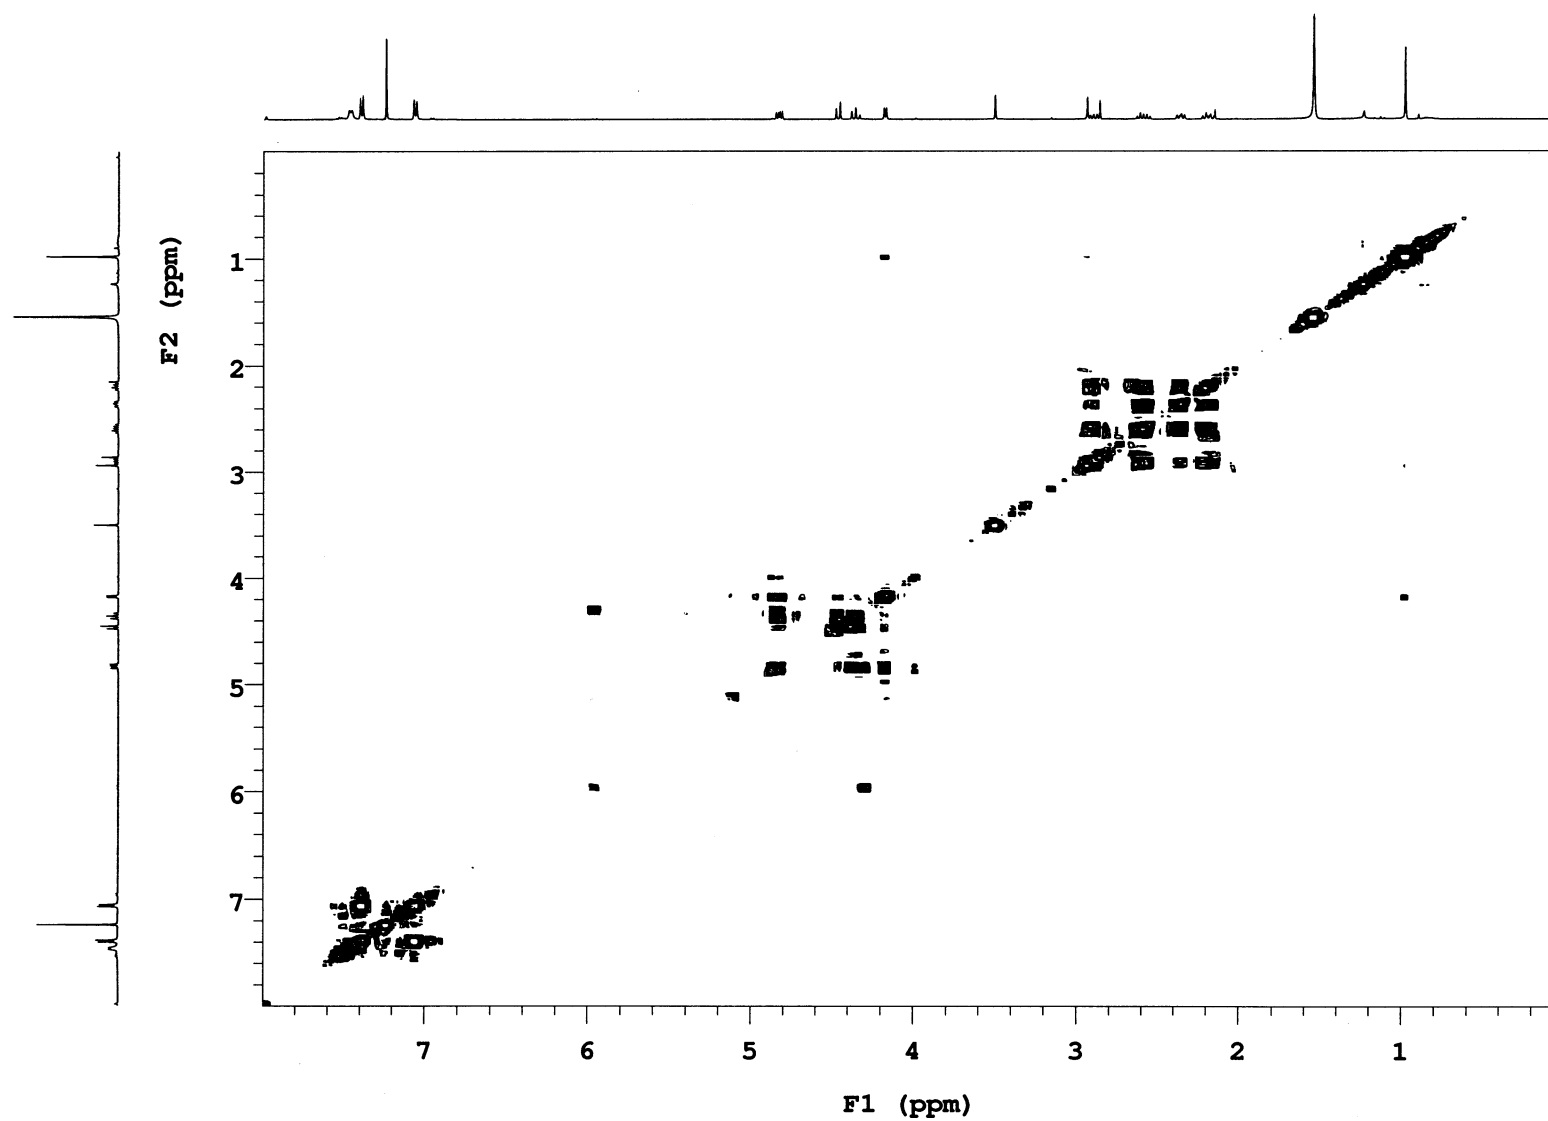



Fig S96. <sup>1</sup>H NMR (CDCl<sub>3</sub>, 500 MHz) of compound 5f.

CHP-8d-f2

Sample Name **CHP-8d-f2**  
Date collected **2016-05-19**

Pulse sequence **PROTON**  
Solvent **cdcl3**

Temperature **25**  
Spectrometer **Agilent-NMR-Inova500**

Study owner **vnmr2**  
Operator **vnmr2**

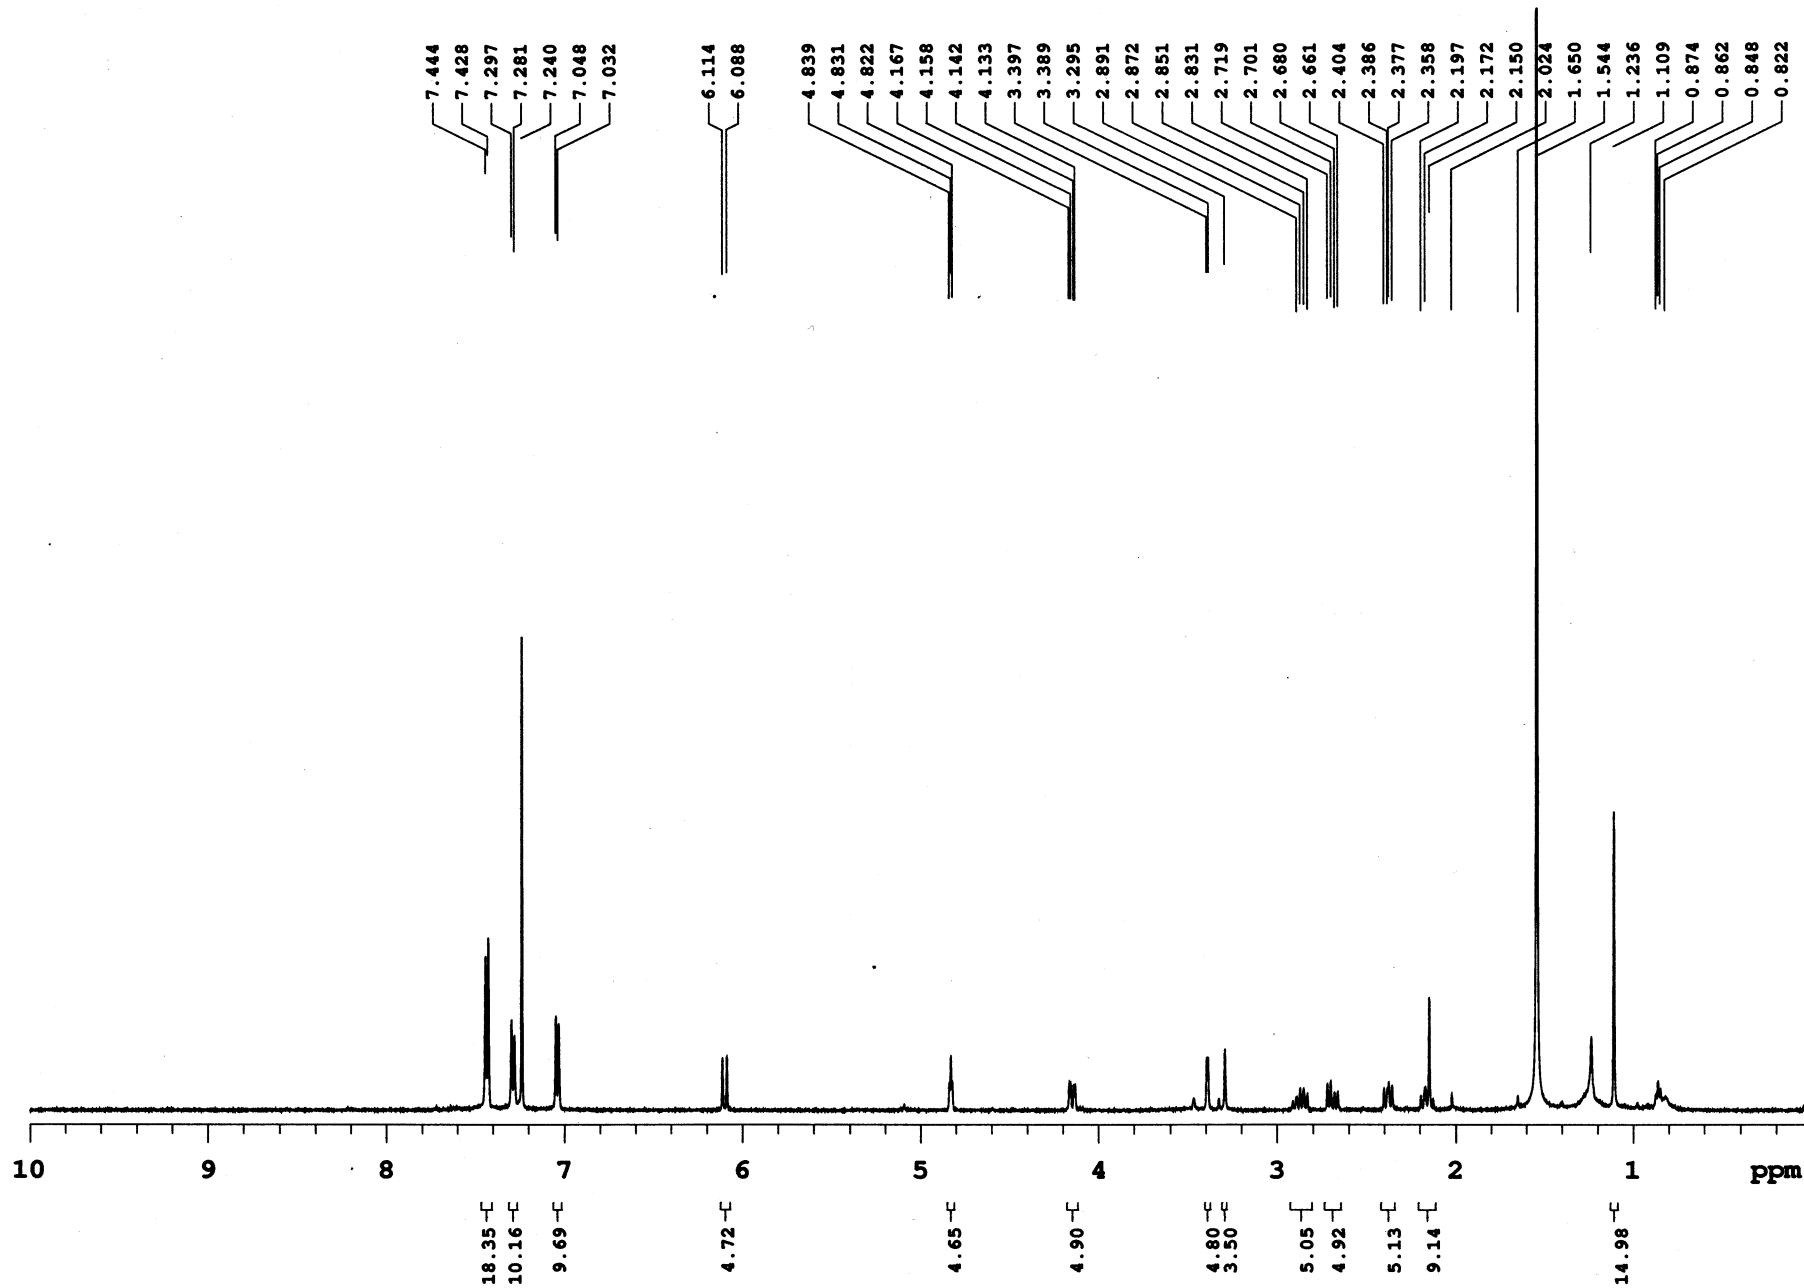

Fig S97 <sup>13</sup>C NMR (CDCl<sub>3</sub>, 125 MHz) of compound 5f.

CHP-8d-I2

Sample Name **CHP-8d-I2**  
Date collected **2016-06-03**

Pulse sequence **CARBON**  
Solvent **cdcl3**

Temperature **25**  
Spectrometer **Agilent-NMR-inova500**

Study owner **vnmr2**  
Operator **vnmr2**

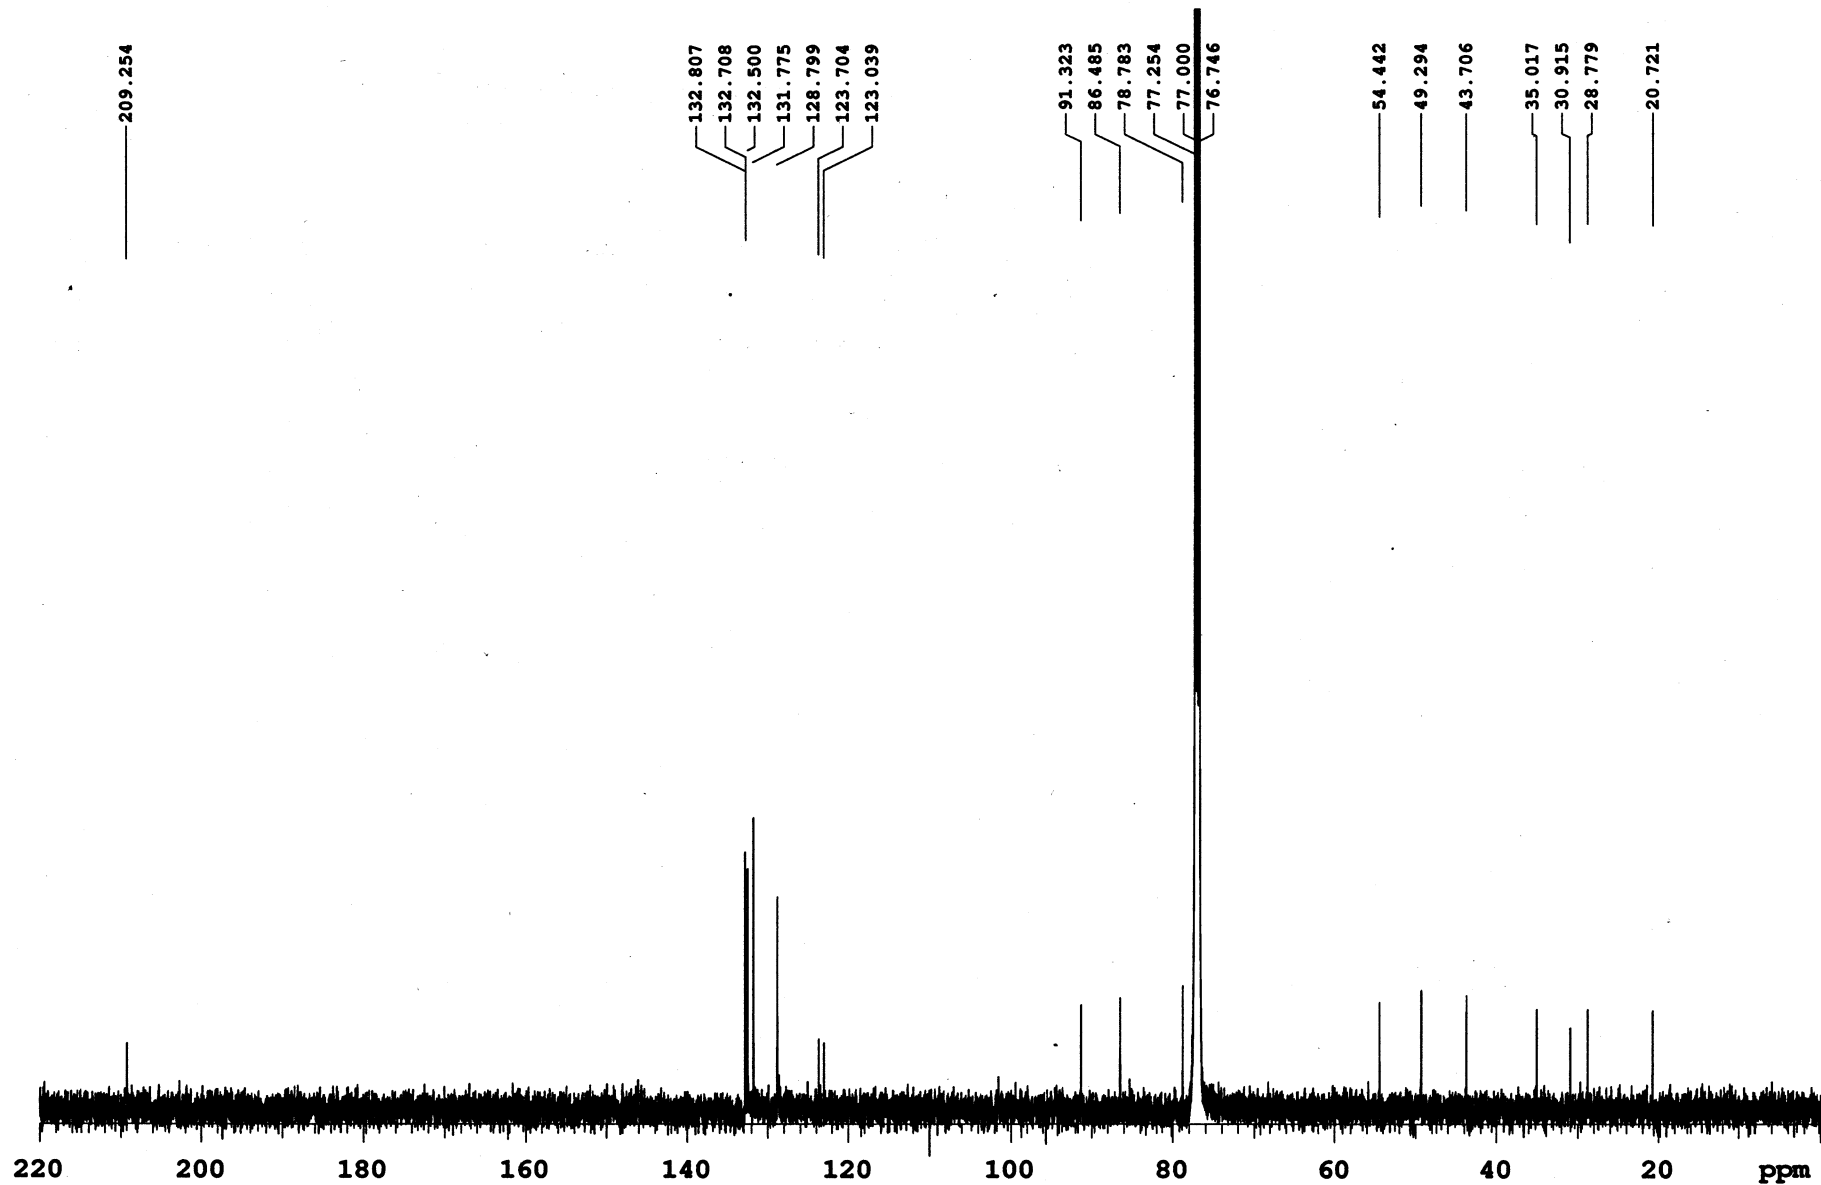

Fig S98. DEPT of compound 5f.

CHP-8d-f2

Sample Name **CHP-8d-f2**  
Date collected **2016-06-04**

Pulse sequence **DEPT**  
Solvent **cdcl3**

Temperature **25**  
Spectrometer **Agilent-NMR-inova500**

Study owner **vnmr2**  
Operator **vnmr2**

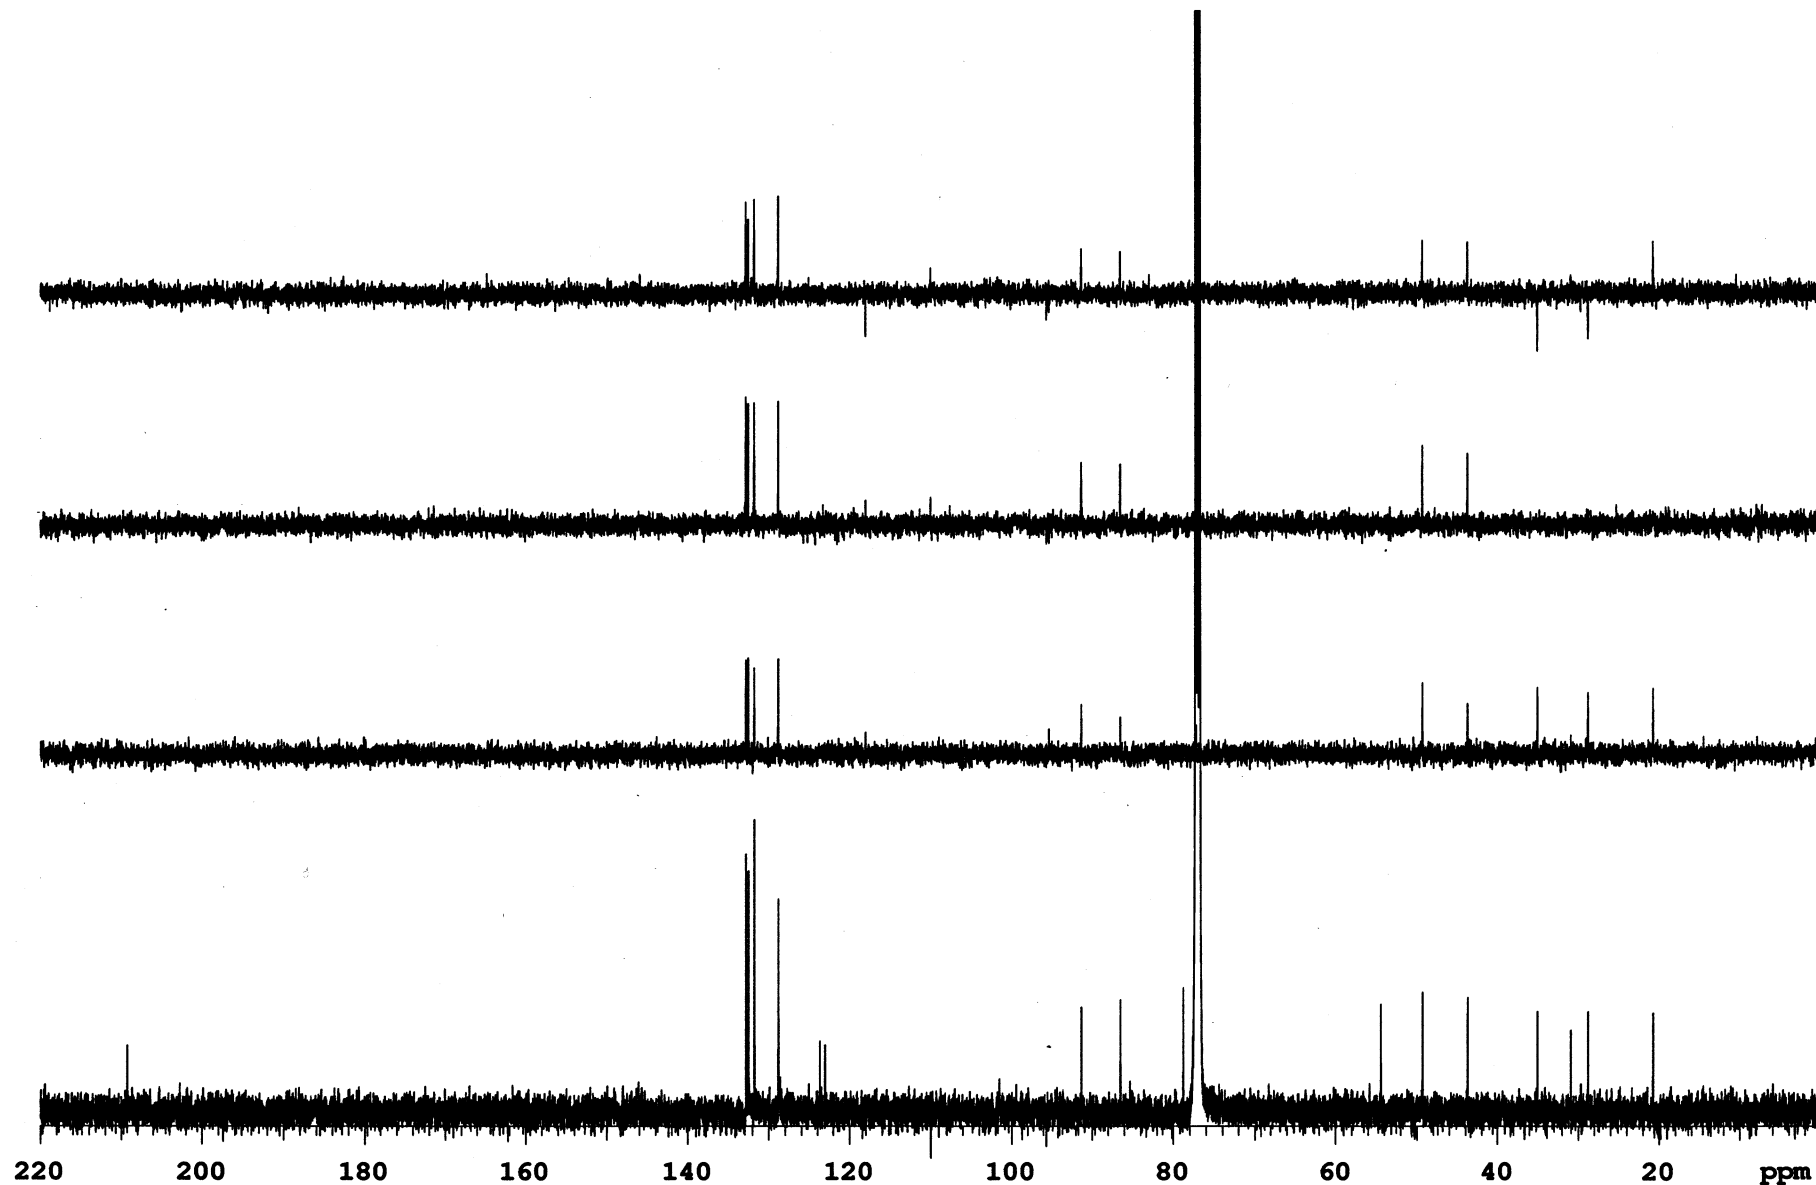

Fig S99. HSQC of compound 5f.

CHP-8d-f2

Sample Name **CHP-8d-f2**  
Date collected **2016-06-18**

Pulse sequence **gHSQC**  
Solvent **cdcl3**

Temperature **25**  
Spectrometer **Agilent-NMR-inova500**

Study owner **vnmr2**  
Operator **vnmr2**

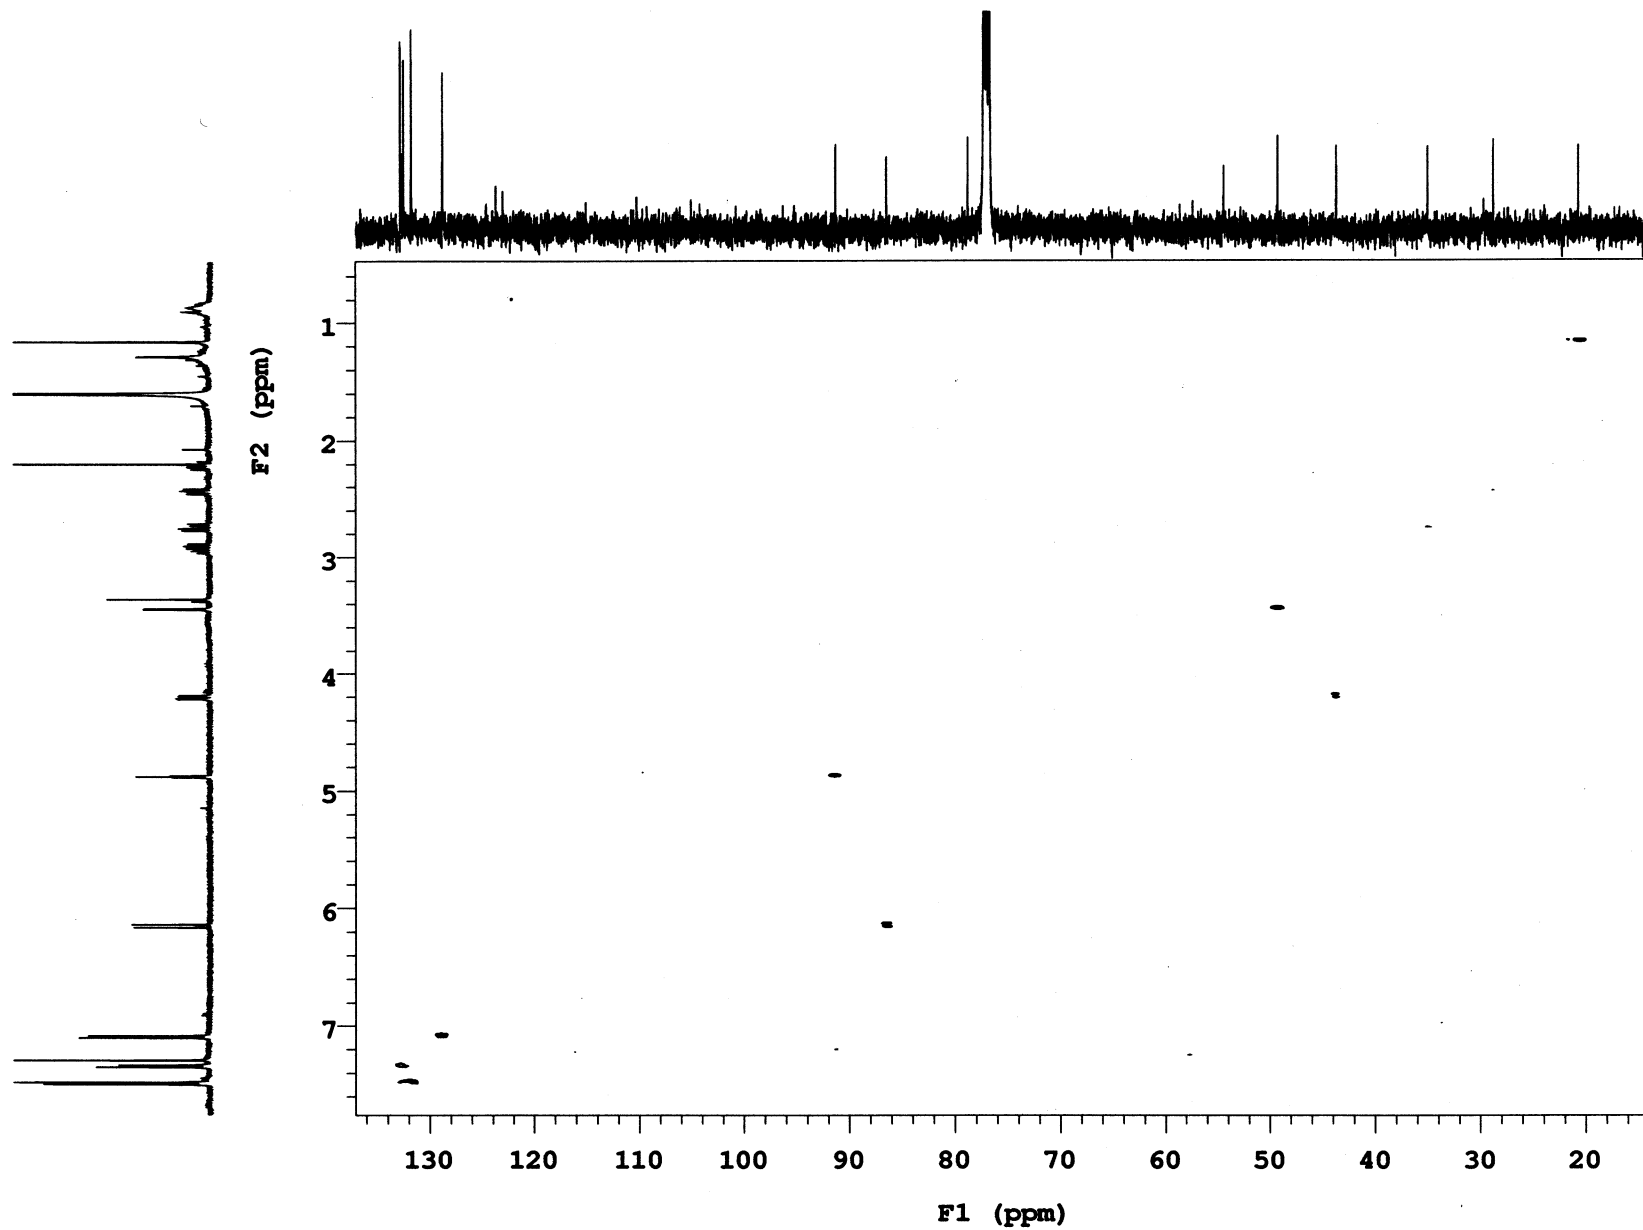





Fig S101. COSY of compound 5f, expanded.

S101

CHP-8d-12

Sample Name **CHP-8d-12**  
Date collected **2016-05-19**

Pulse sequence **gCOSY**  
Solvent **cdcl3**

Temperature **25**  
Spectrometer **Agilent-NMR-inova500**

Study owner **vnmr2**  
Operator **vnmr2**

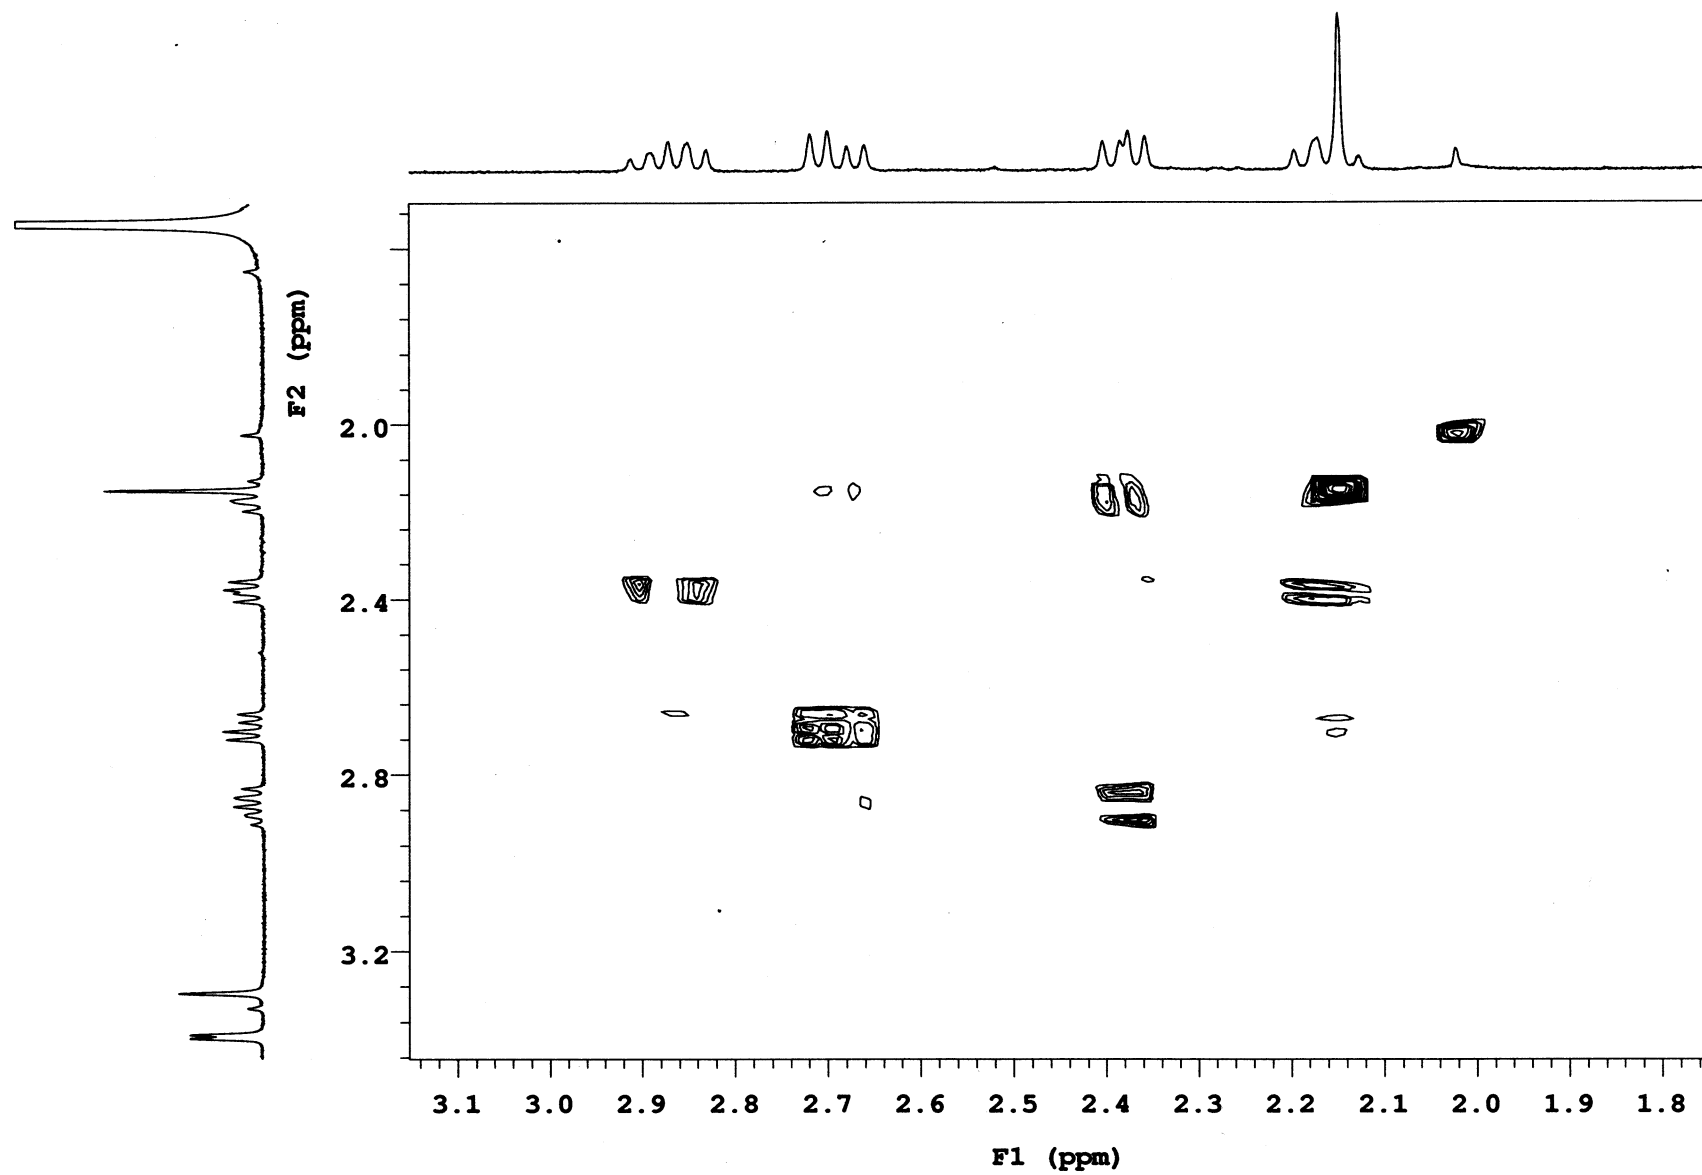

Fig S102. NOESY of compound 5f.

CHP-8d-f2

Sample Name **CHP-8d-f2**  
Date collected **2016-05-19**

Pulse sequence **NOESY**  
Solvent **cdcl3**

Temperature **25**  
Spectrometer **Agilent-NMR-inova500**

Study owner **vnmr2**  
Operator **vnmr2**

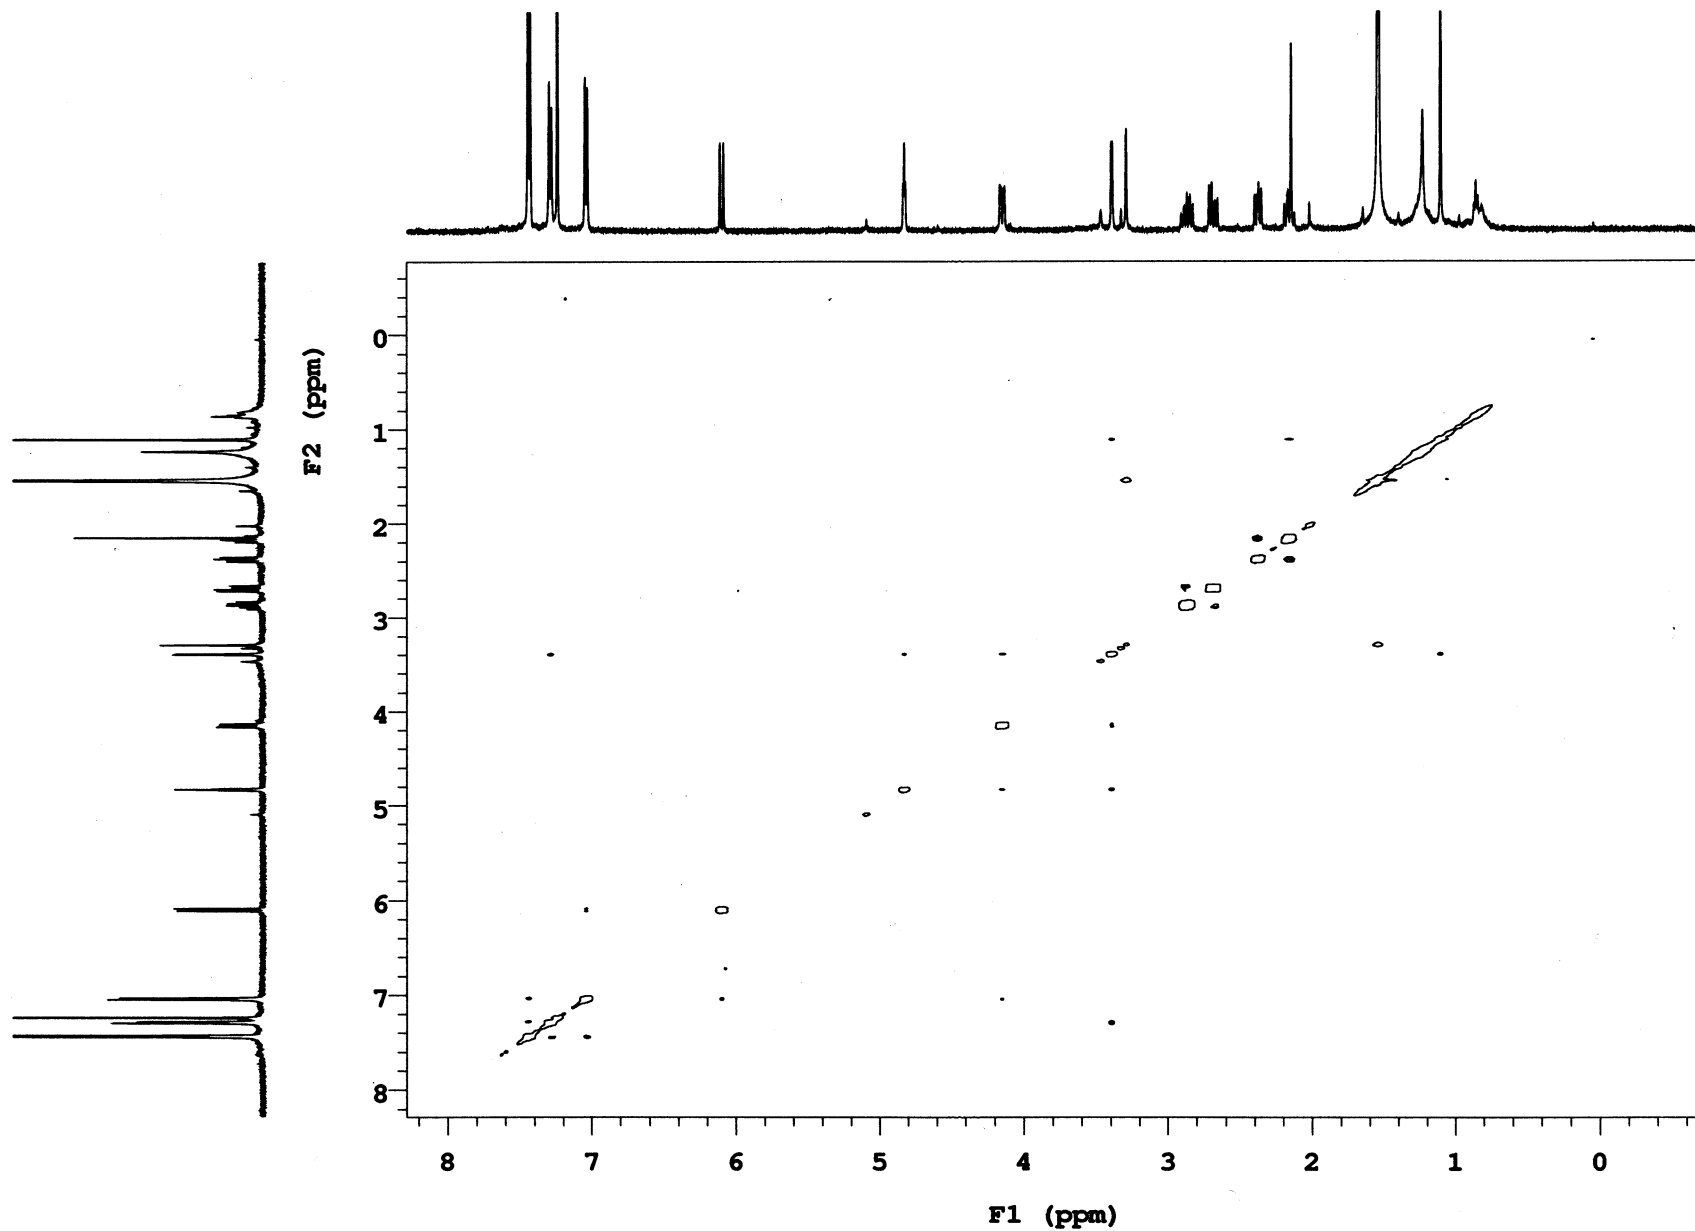

Fig S103. <sup>1</sup>H NMR (acetone-d<sub>6</sub>, 500 MHz) of compound 3g.

CHP-081

Sample Name **CHP-081**  
Date collected **2016-03-05**

Pulse sequence **PROTON**  
Solvent **acetone**

Temperature **25**  
Spectrometer **Agilent-NMR-inova500**

Study owner: **vnmr2**  
Operator **vnmr2**

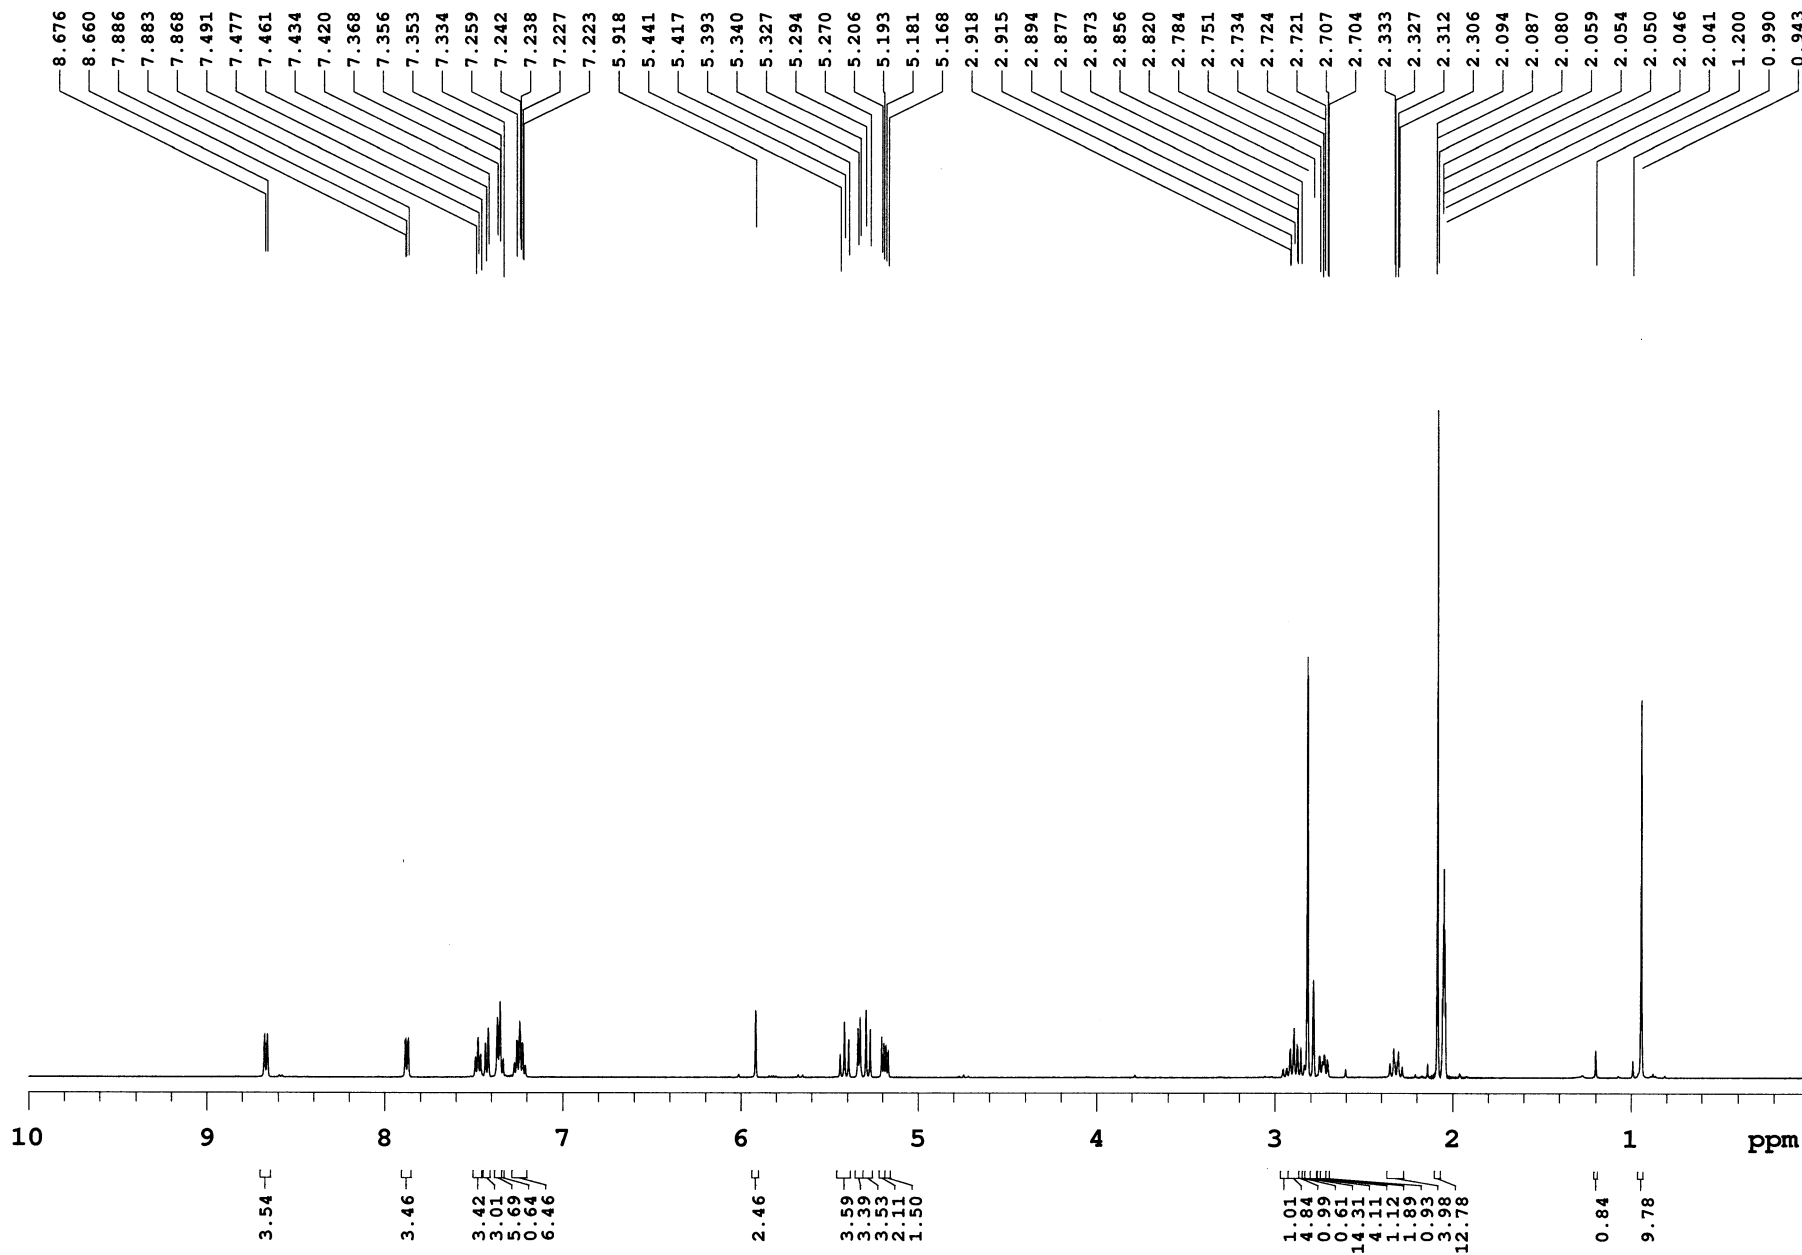

Fig S104. <sup>13</sup>C NMR (acetone-d<sub>6</sub>, 125 MHz) of compound 3g.

CHP-08I

Sample Name **CHP-08I**  
Date collected **2016-03-05**

Pulse sequence **CARBON**  
Solvent **acetone**

Temperature **25**  
Spectrometer **Agilent-NMR-inova500**

Study owner **vnmr2**  
Operator **vnmr2**

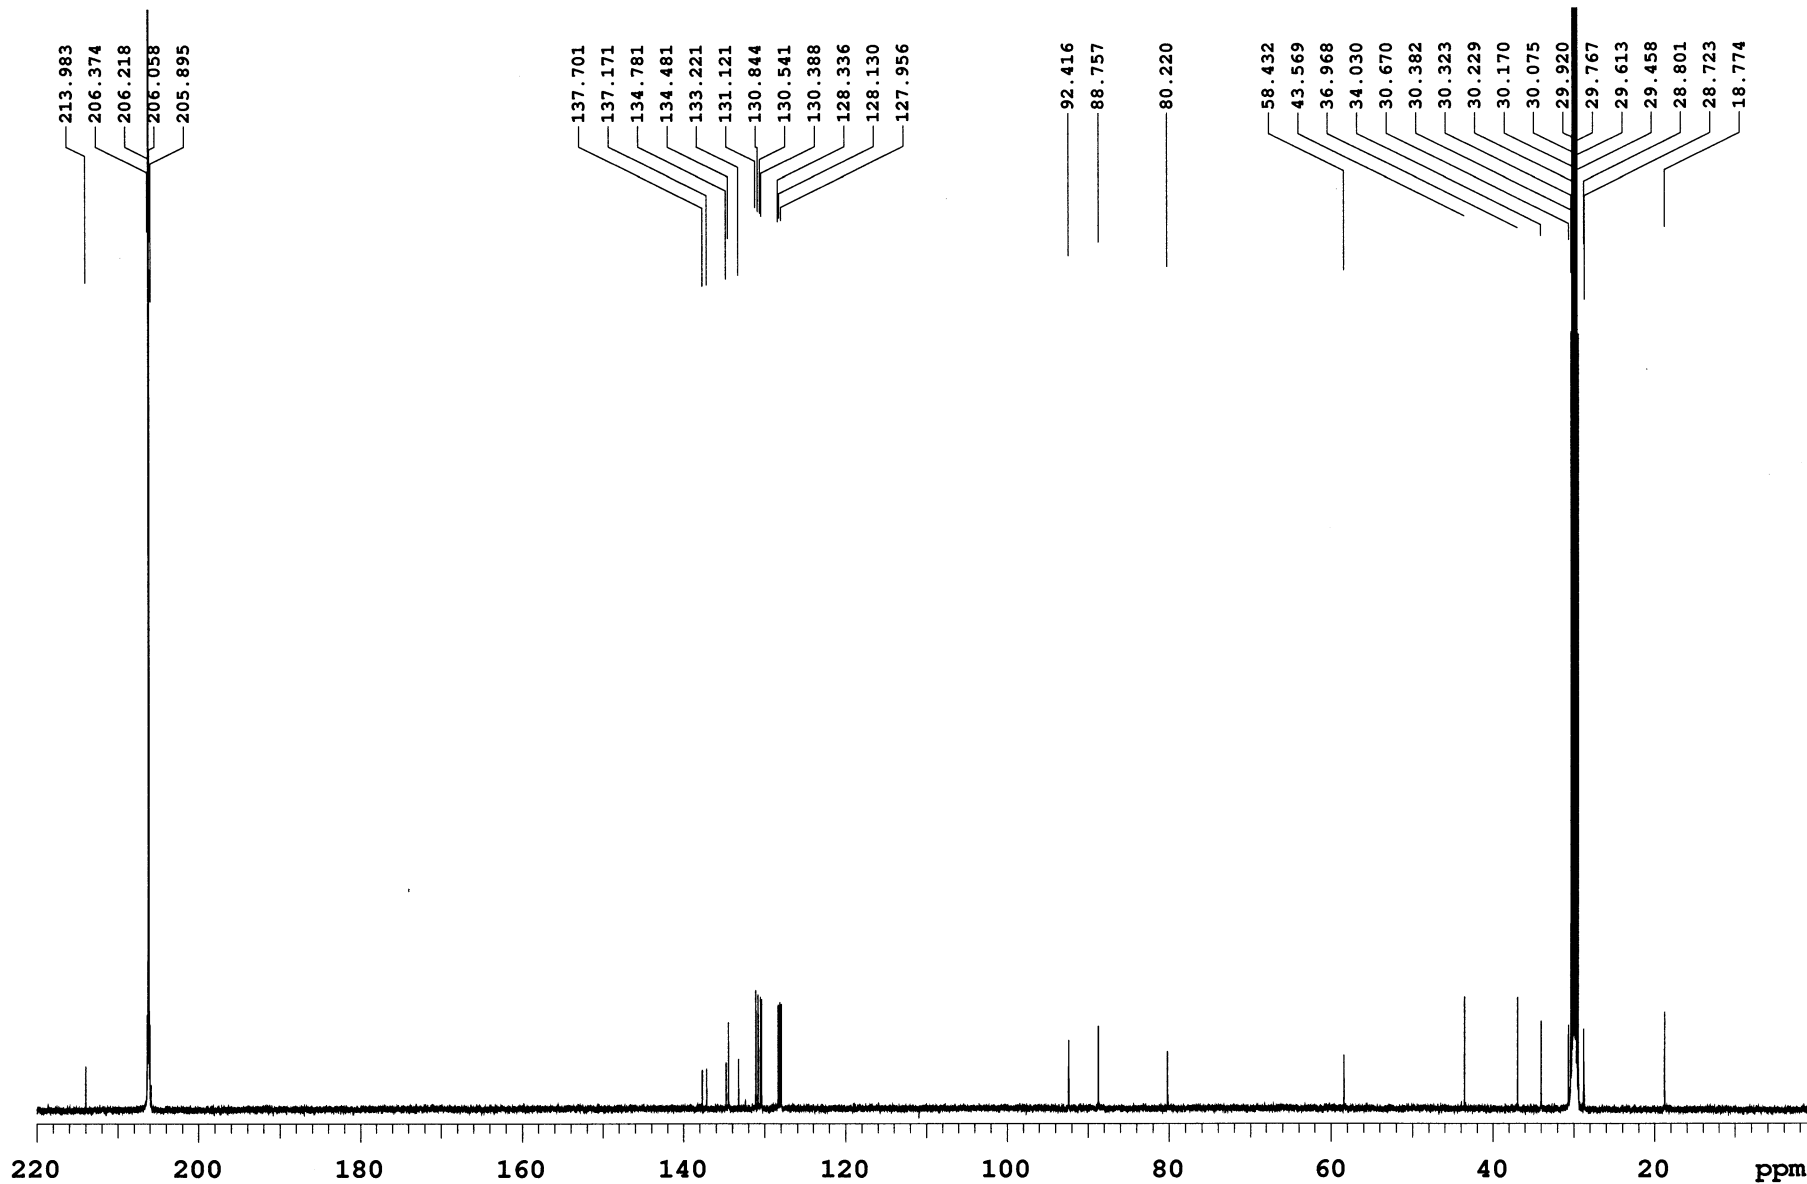

Fig S105. DEPT of compound 3g.

CHP-081

Sample Name **CHP-081**  
Date collected **2016-03-05**

Pulse sequence **DEPT**  
Solvent **acetone**

Temperature **25**  
Spectrometer **Agilent-NMR-inova500**

Study owner **vnmr2**  
Operator **vnmr2**

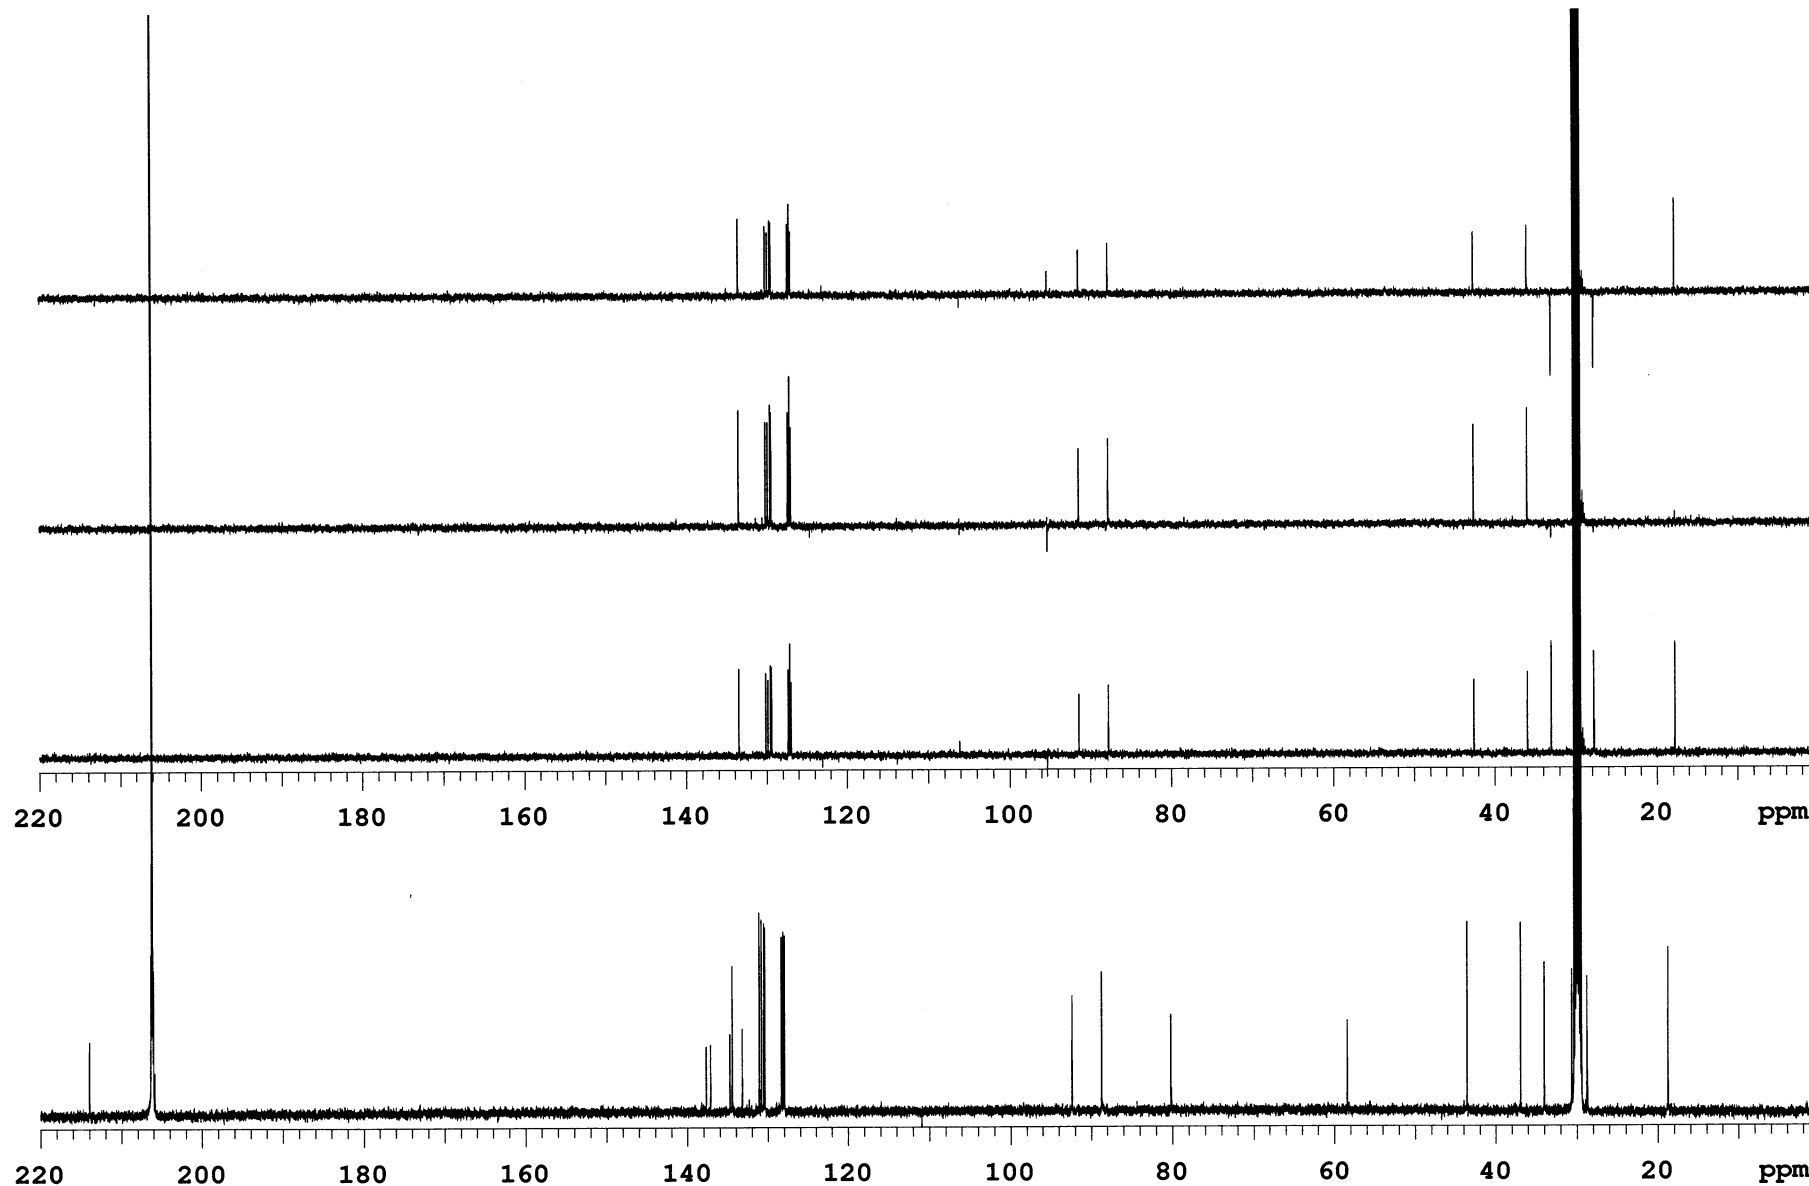

Fig S106. HSQC of compound 3g.

S106

CHP-081

Sample Name **CHP-081**  
Date collected **2016-03-05**

Pulse sequence **gHSQC**  
Solvent **acetone**

Temperature **25**  
Spectrometer **Agilent-NMR-inova500**

Study owner **vnmr2**  
Operator **vnmr2**

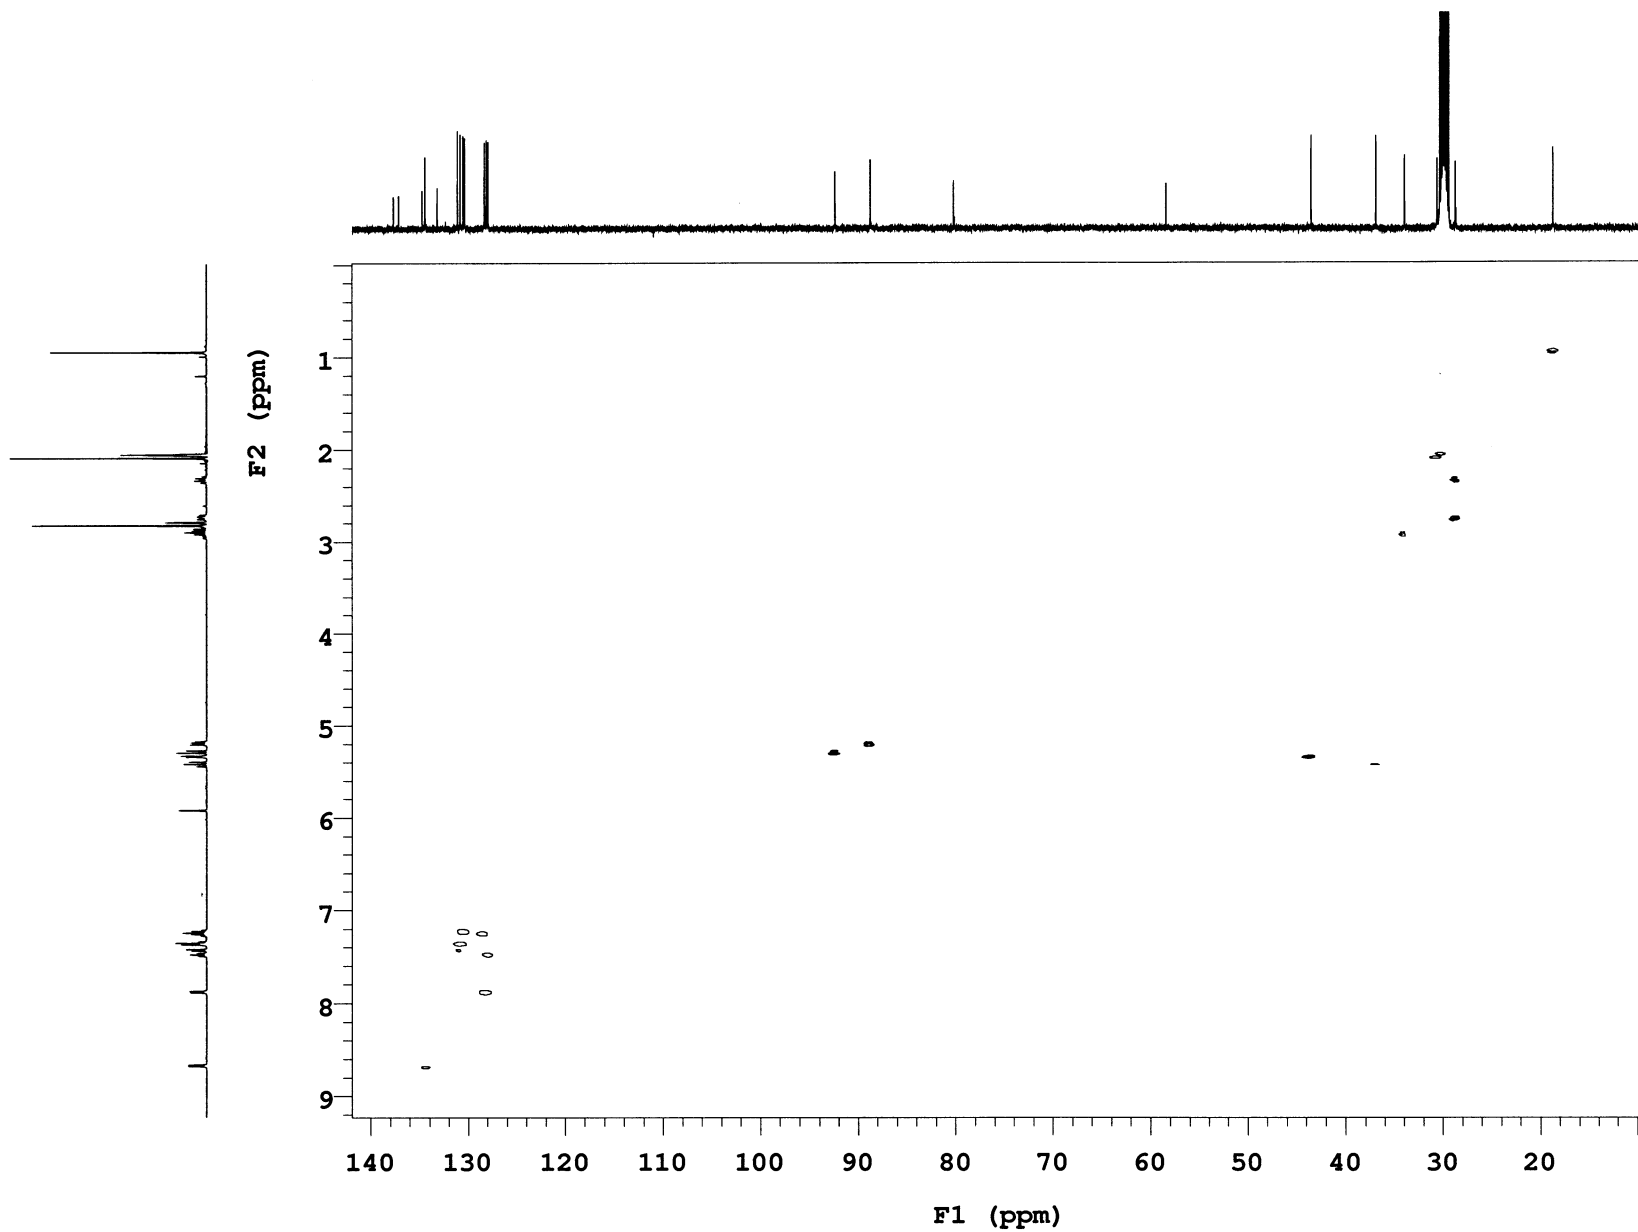

Fig S107. COSY of compound 3g.

CHP-08I

Sample Name **CHP-08I**  
Date collected **2016-03-05**

Pulse sequence **gCOSY**  
Solvent **acetone**

Temperature **25**  
Spectrometer **Agilent-NMR-inova500**

Study owner **vnmr2**  
Operator **vnmr2**

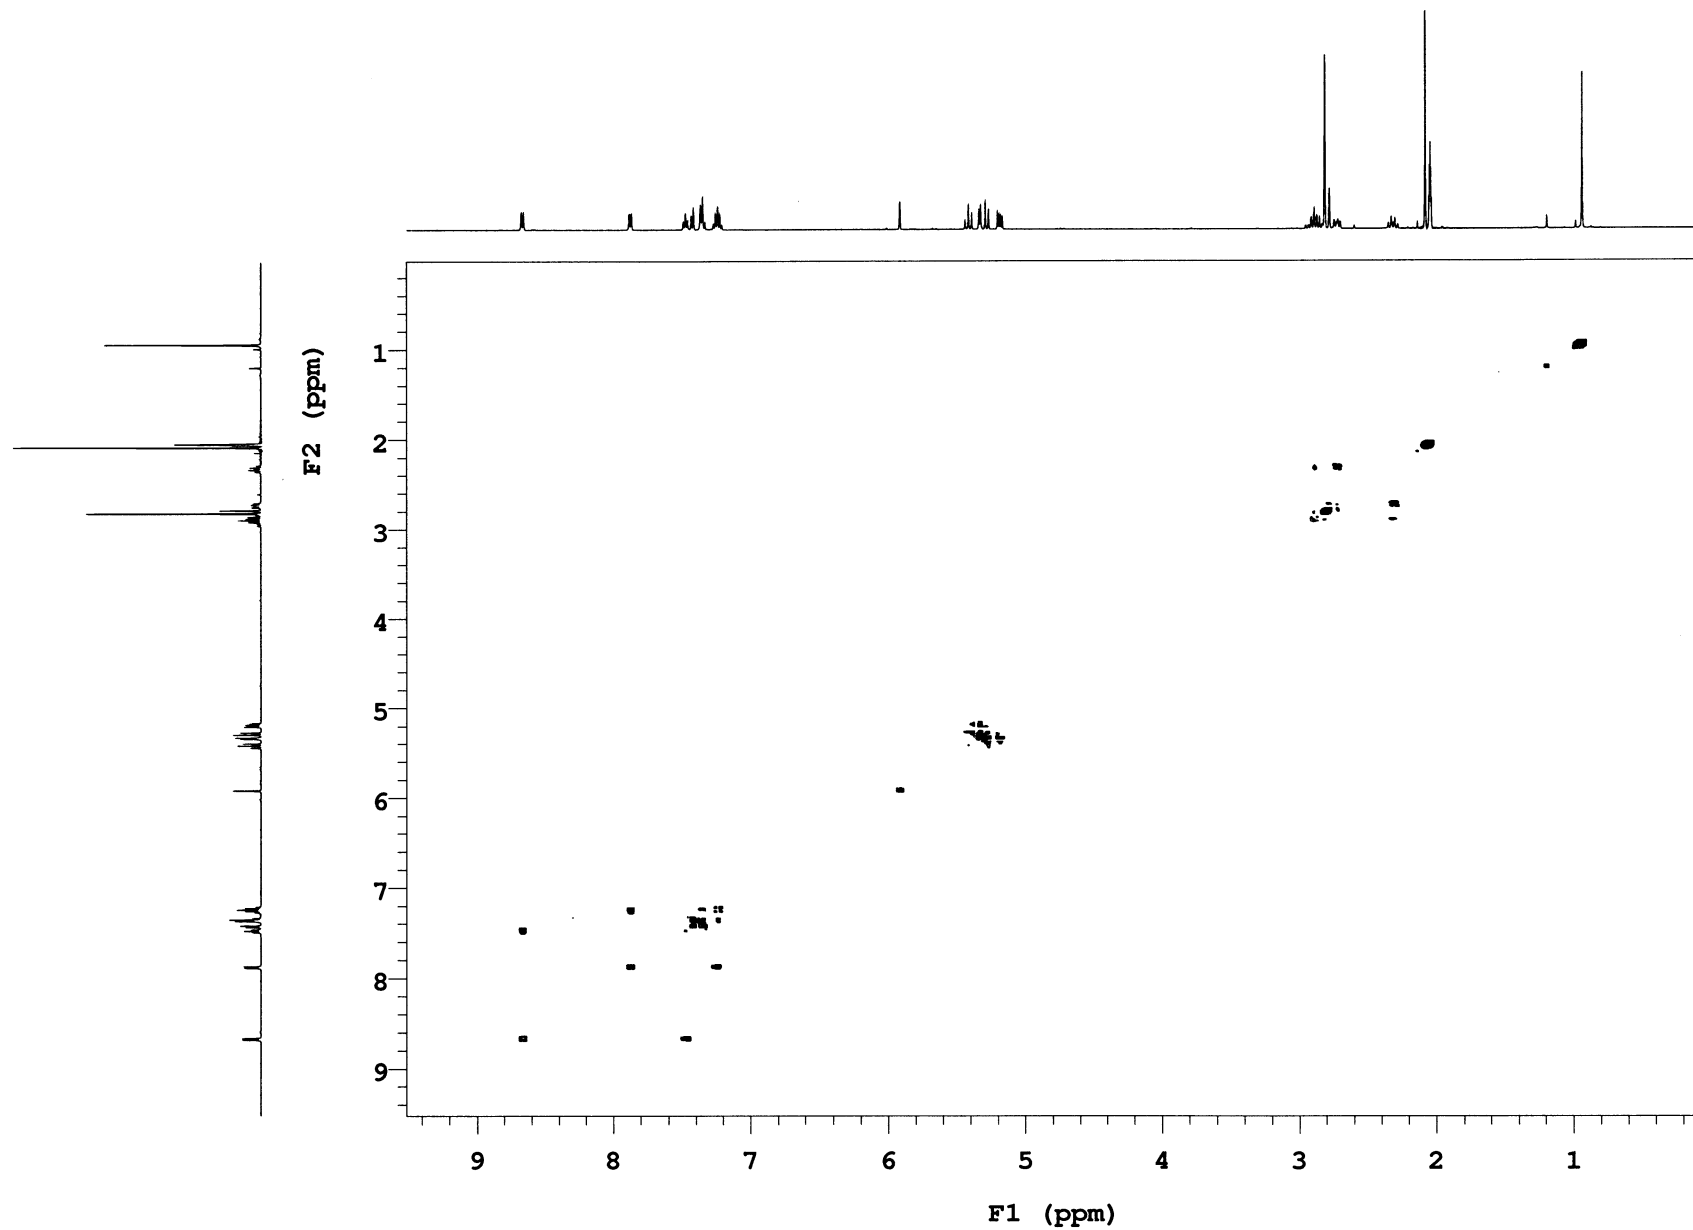

Fig S108. NOESY of compound 3g.

CHP-081

Sample Name **CHP-081**  
Date collected **2016-03-05**

Pulse sequence **NOESY**  
Solvent **acetone**

Temperature **25**  
Spectrometer **Agilent-NMR-inova500**

Study owner **vnmr2**  
Operator **vnmr2**

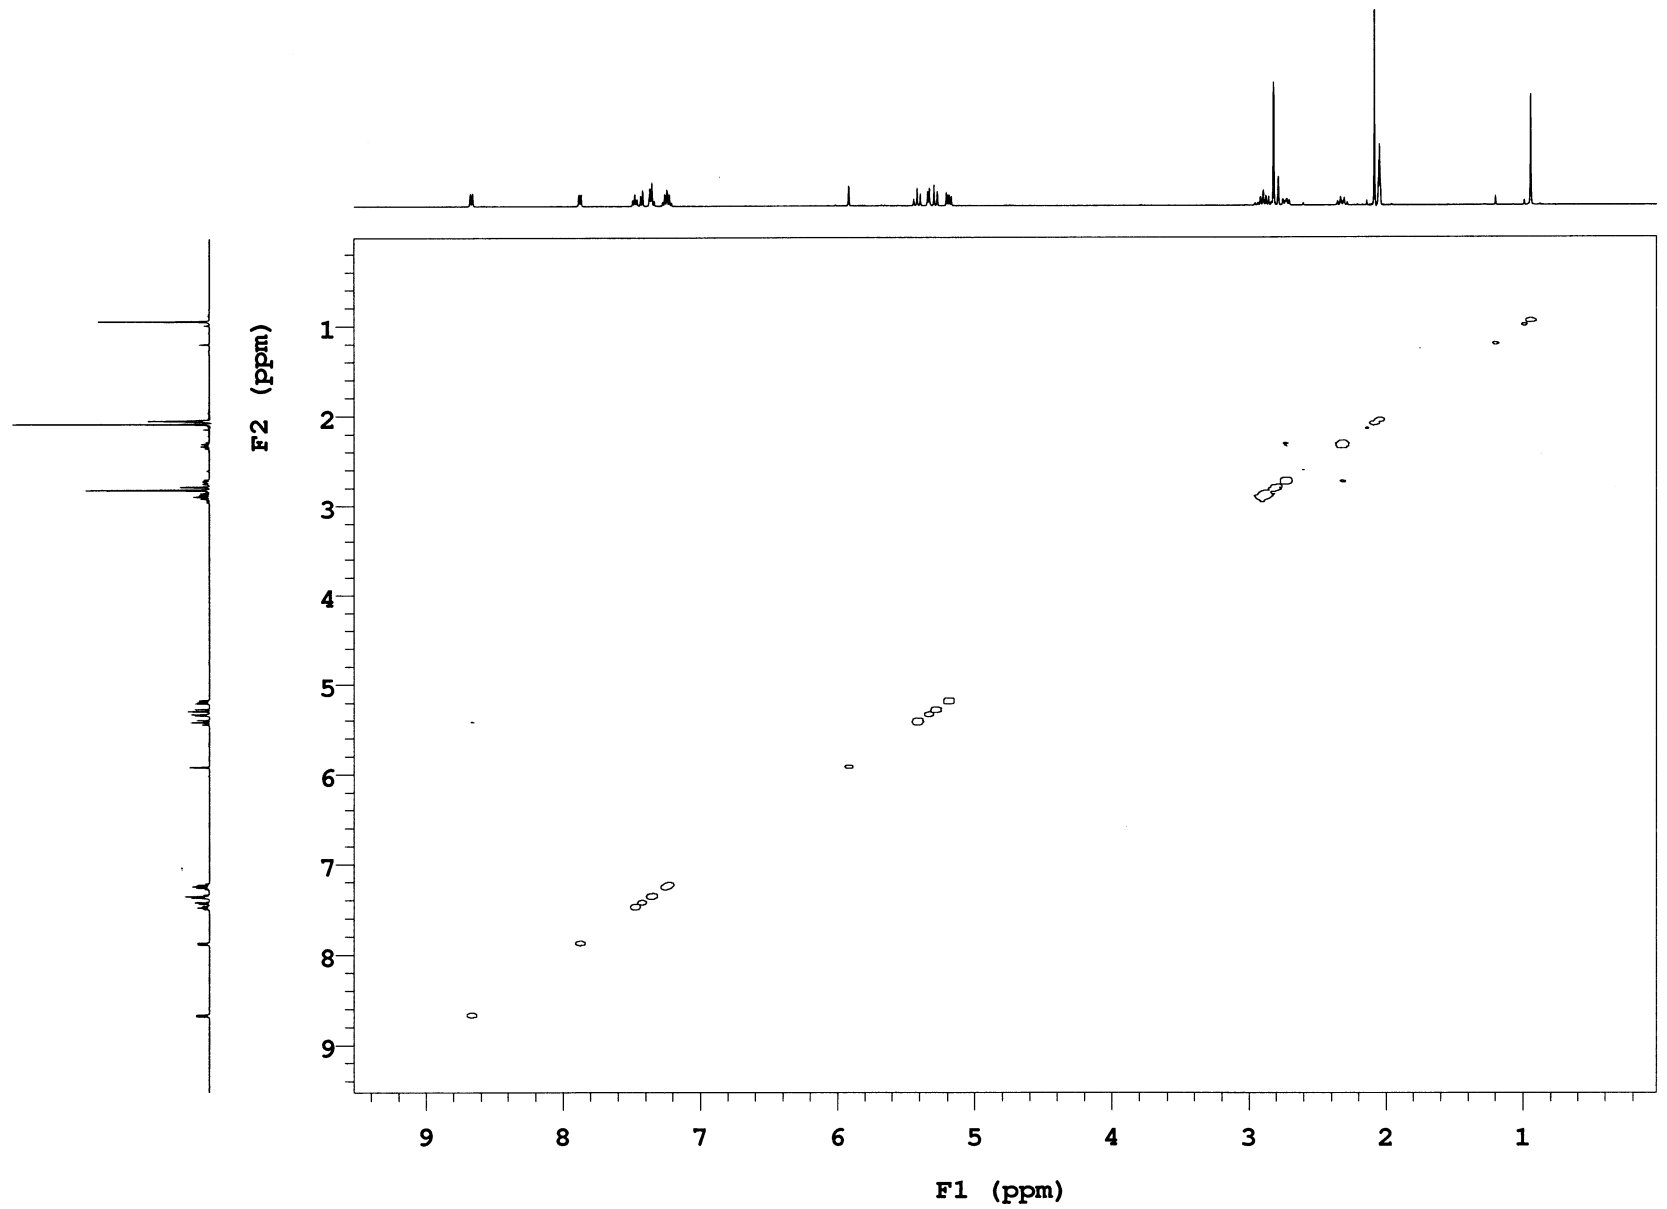



Fig S109. <sup>1</sup>H NMR (acetone-d<sub>6</sub>, 500 MHz) of compound 5g.

CHP-81-f1

Sample Name **CHP-81-f1**  
Date collected **2016-05-27**

Pulse sequence **PROTON**  
Solvent **acetone**

Temperature **25**  
Spectrometer **Agilent-NMR-inova500**

Study owner **vnmr2**  
Operator **vnmr2**

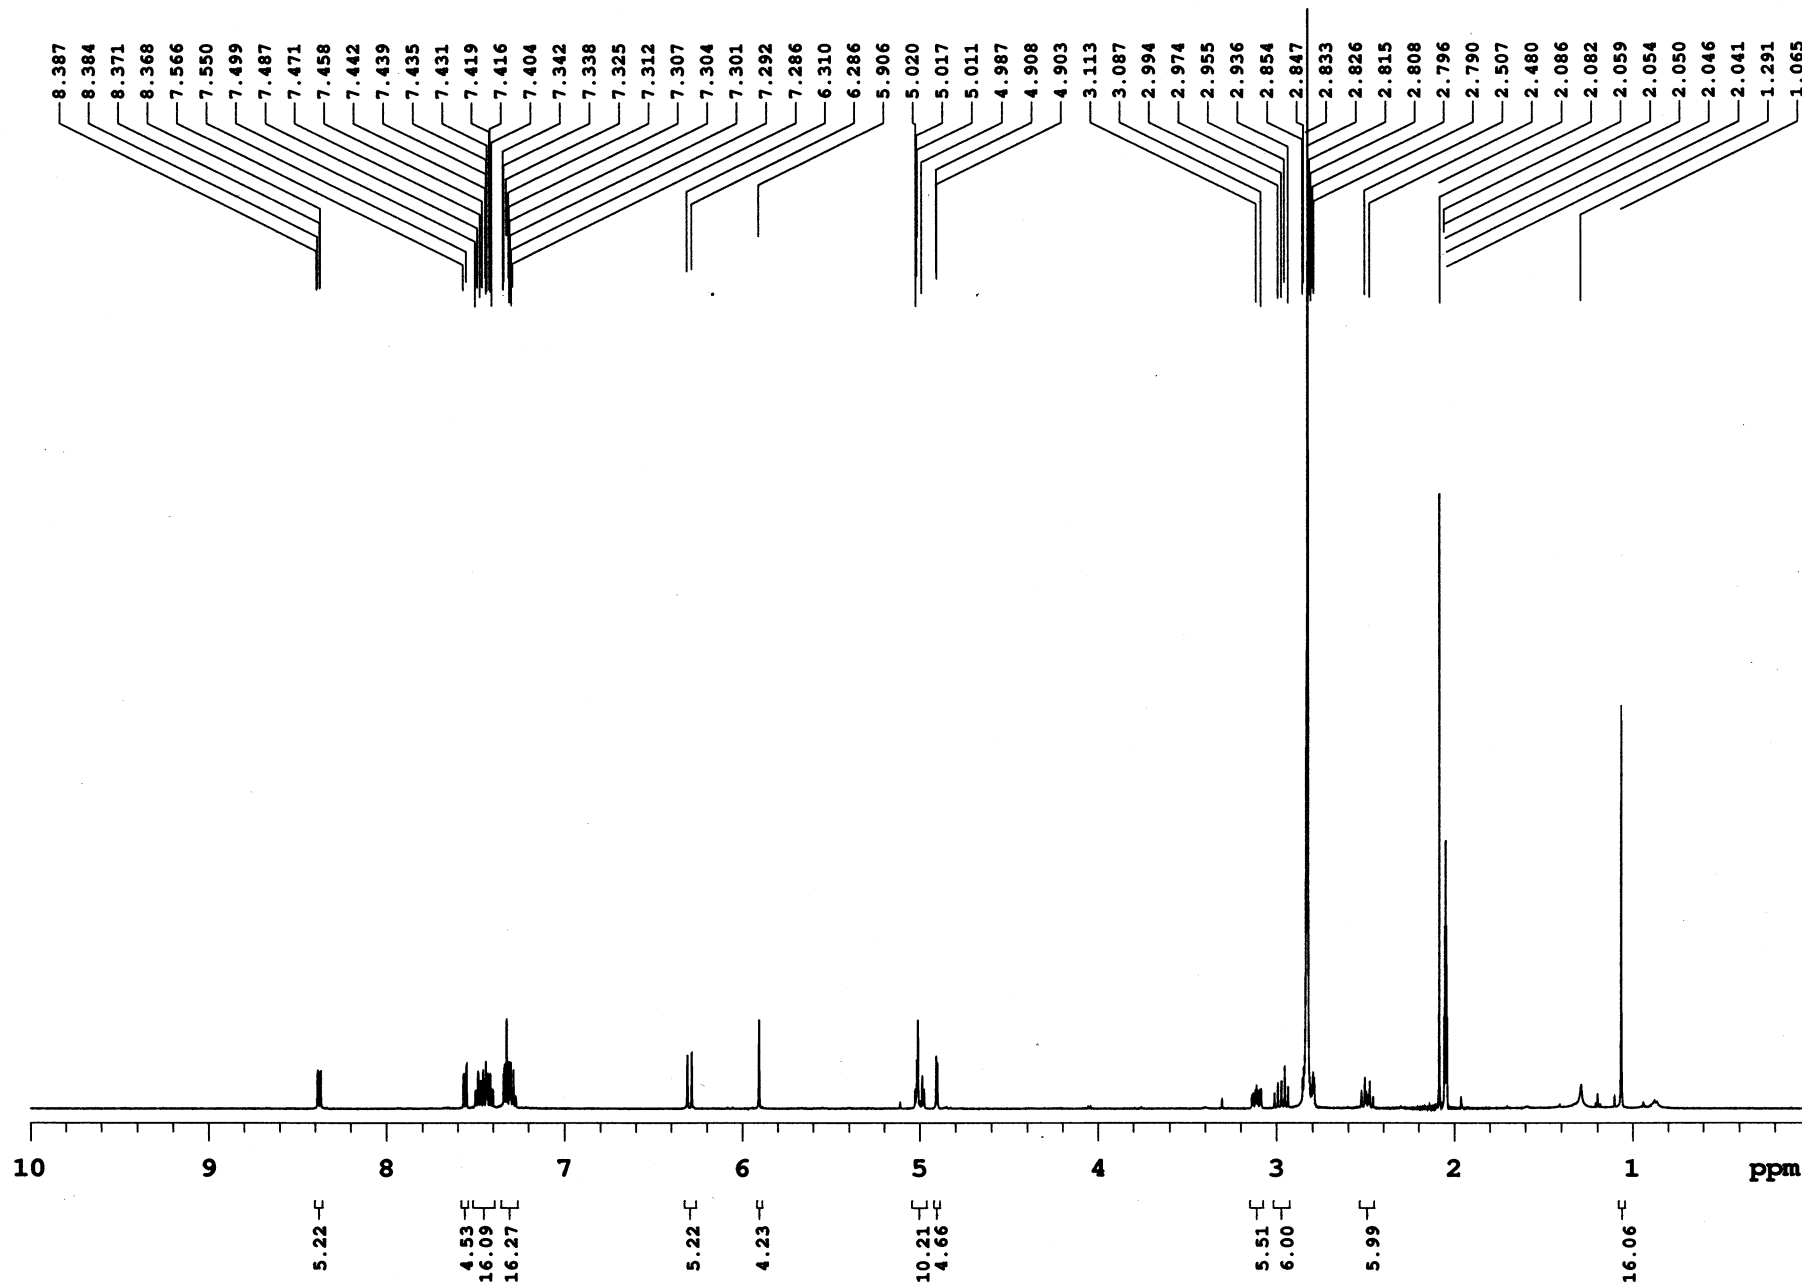

Fig S110. <sup>13</sup>C NMR (acetone-d<sub>6</sub>, 125 MHz) of compound 5g.

CHP-81-11

Sample Name **CHP-81-11**  
Date collected **2016-05-27**

Pulse sequence **CARBON**  
Solvent **acetone**

Temperature **25**  
Spectrometer **Agilent-NMR-inova500**

Study owner **vnmr2**  
Operator **vnmr2**

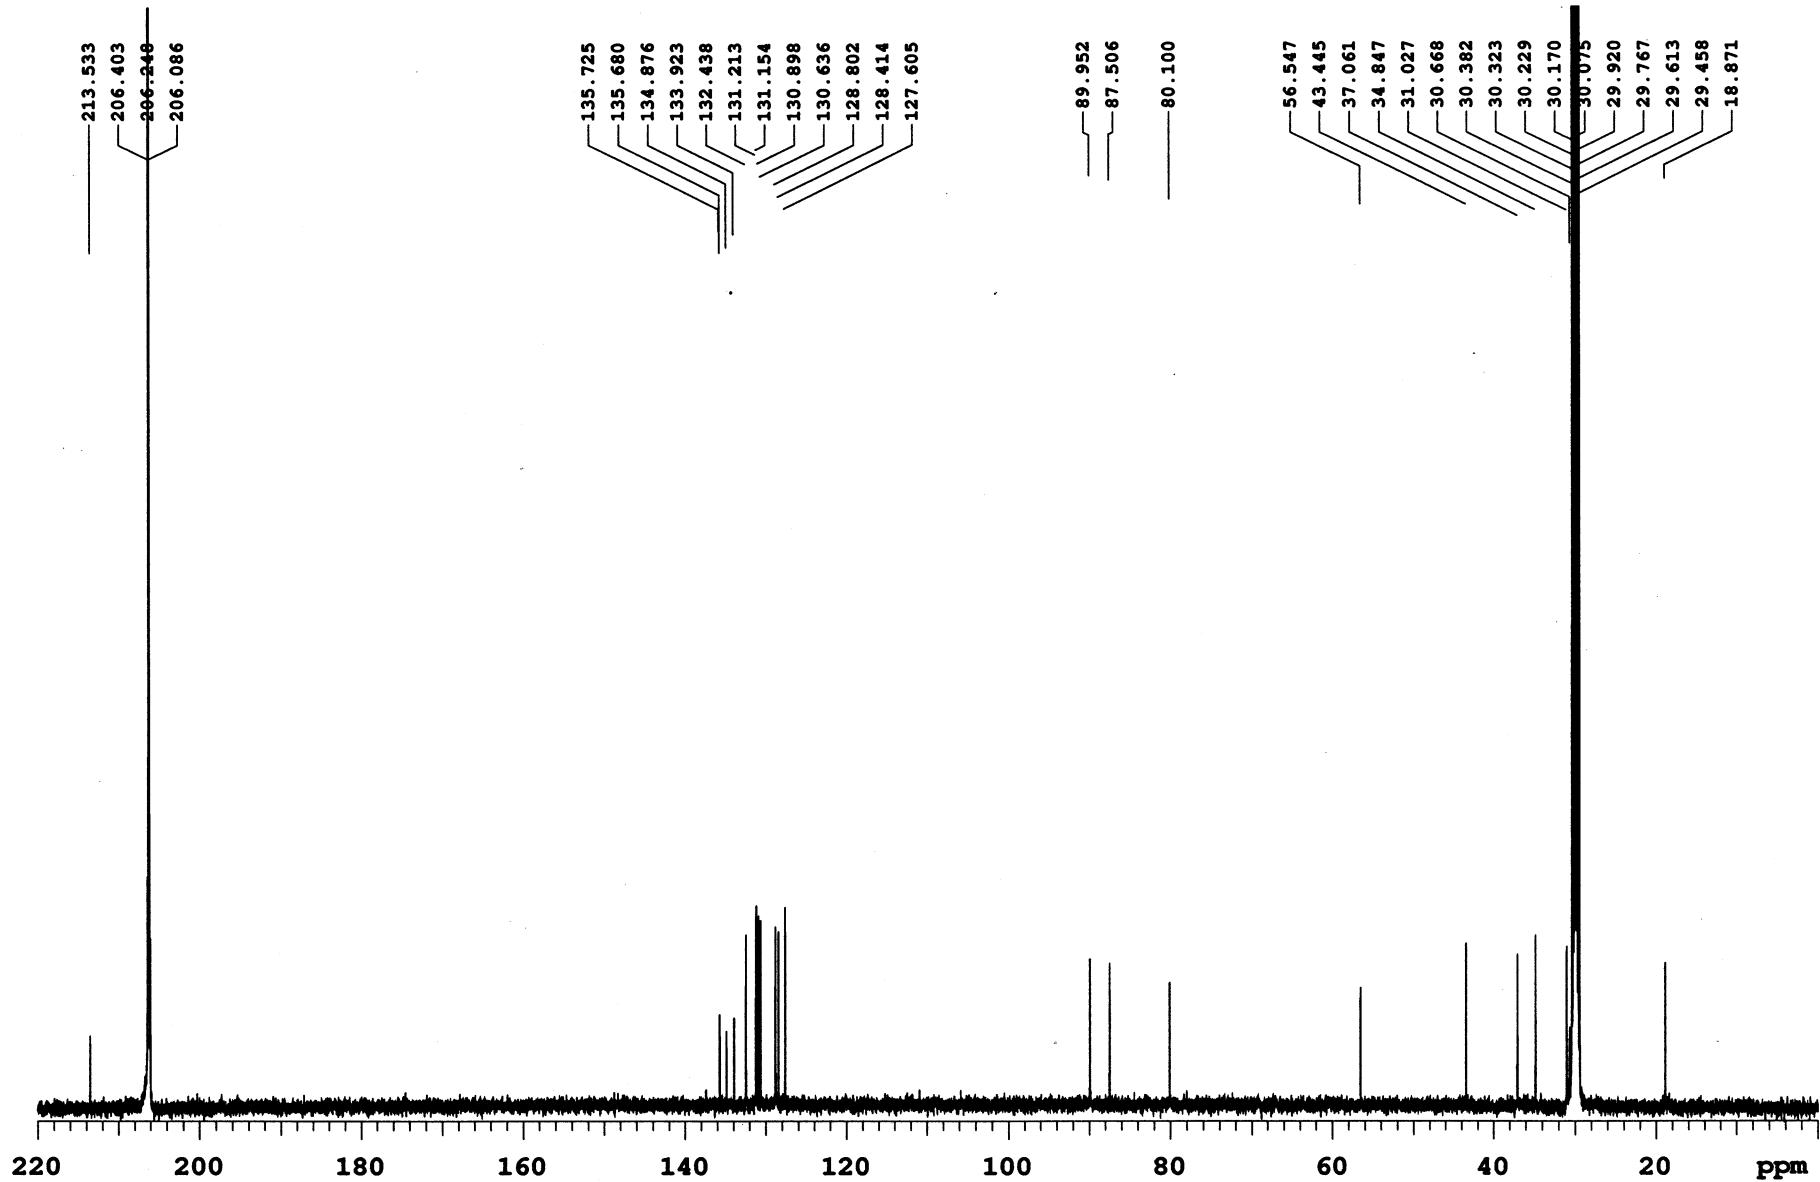

Fig S111. DEPT of compound 5g.

S111

CHP-81-11

Sample Name **CHP-81-11**  
Date collected **2016-05-27**

Pulse sequence **DEPT**  
Solvent **acetone**

Temperature **25**  
Spectrometer **Agilent-NMR-inova500**

Study owner **vnmr2**  
Operator **vnmr2**

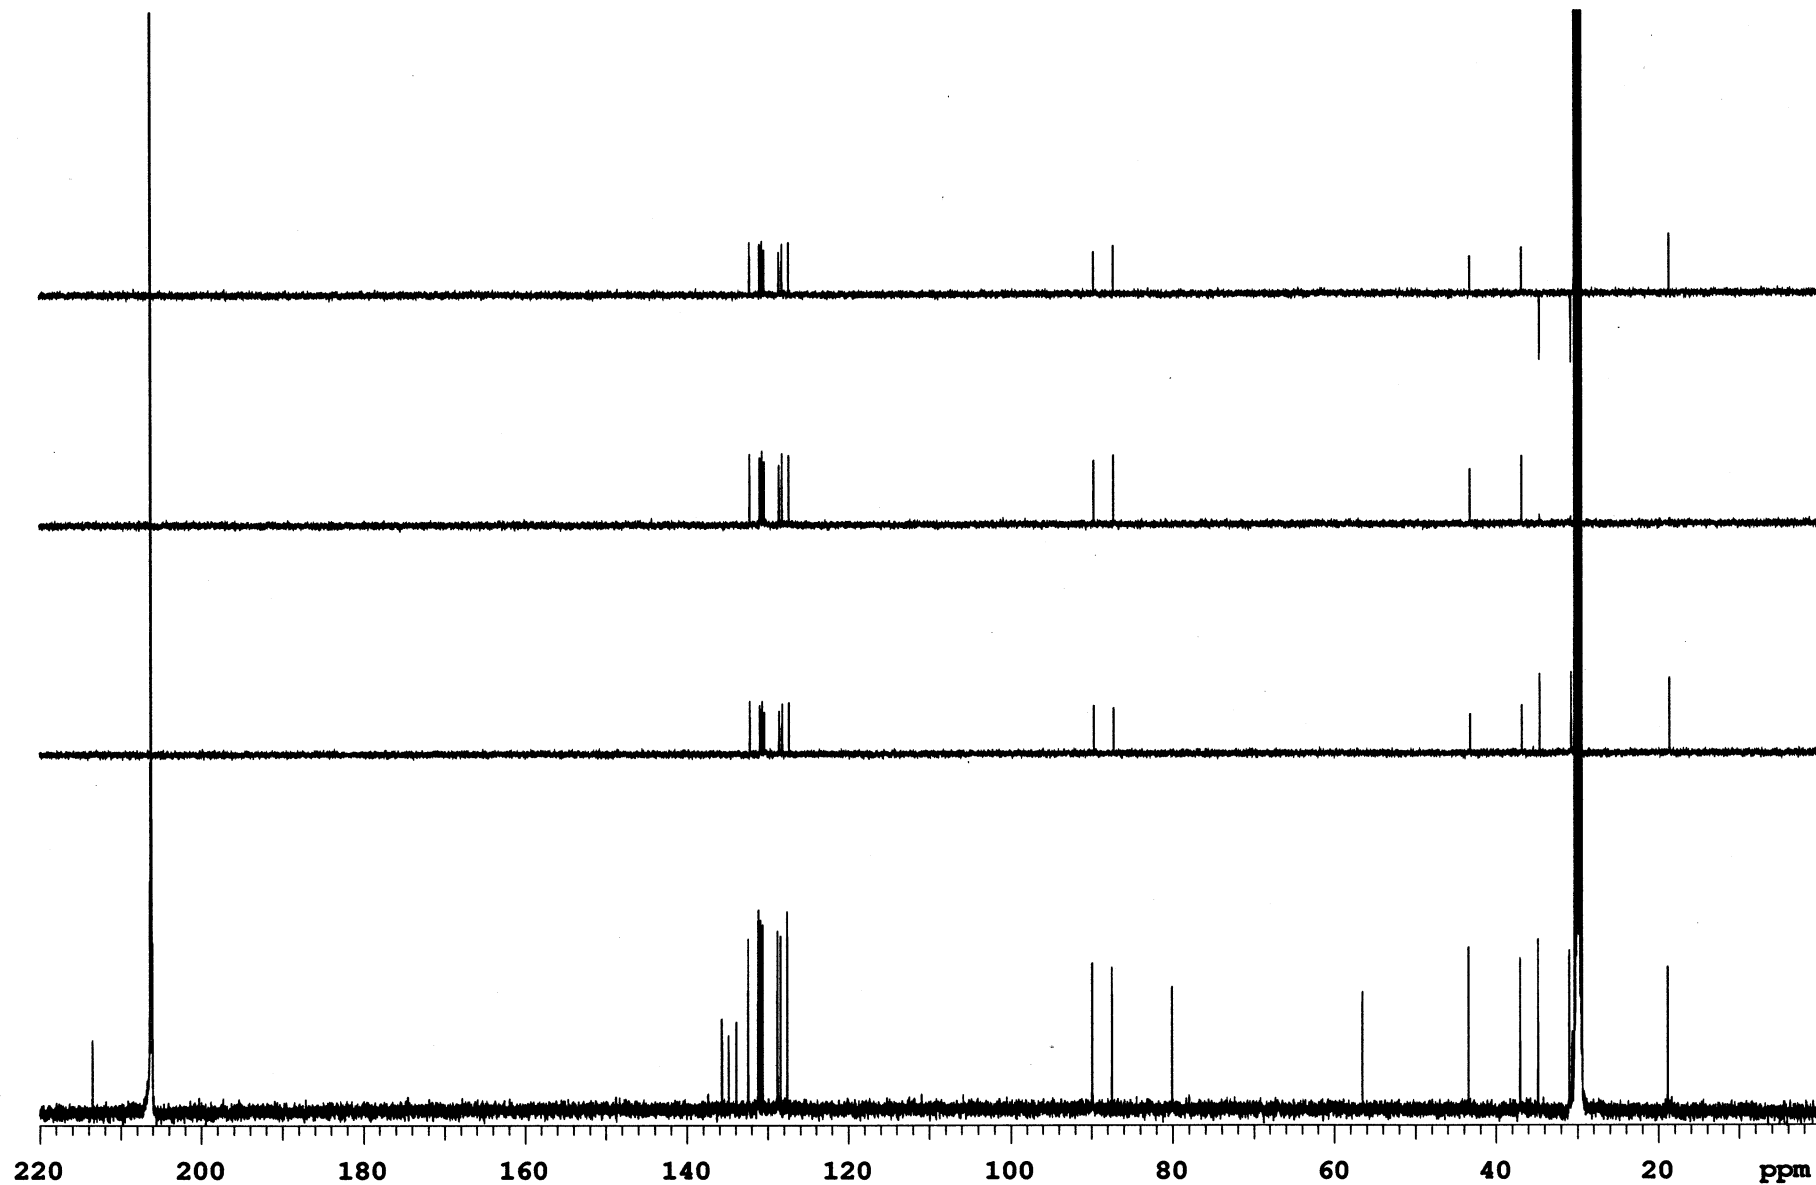

Fig S112. HSQC of compound 5g.

S112

CHP-81-f1

Sample Name **CHP-81-f1**  
Date collected **2016-05-27**

Pulse sequence **gHSQC**  
Solvent **acetone**

Temperature **25**  
Spectrometer **Agilent-NMR-Inova500**

Study owner **vnmr2**  
Operator **vnmr2**

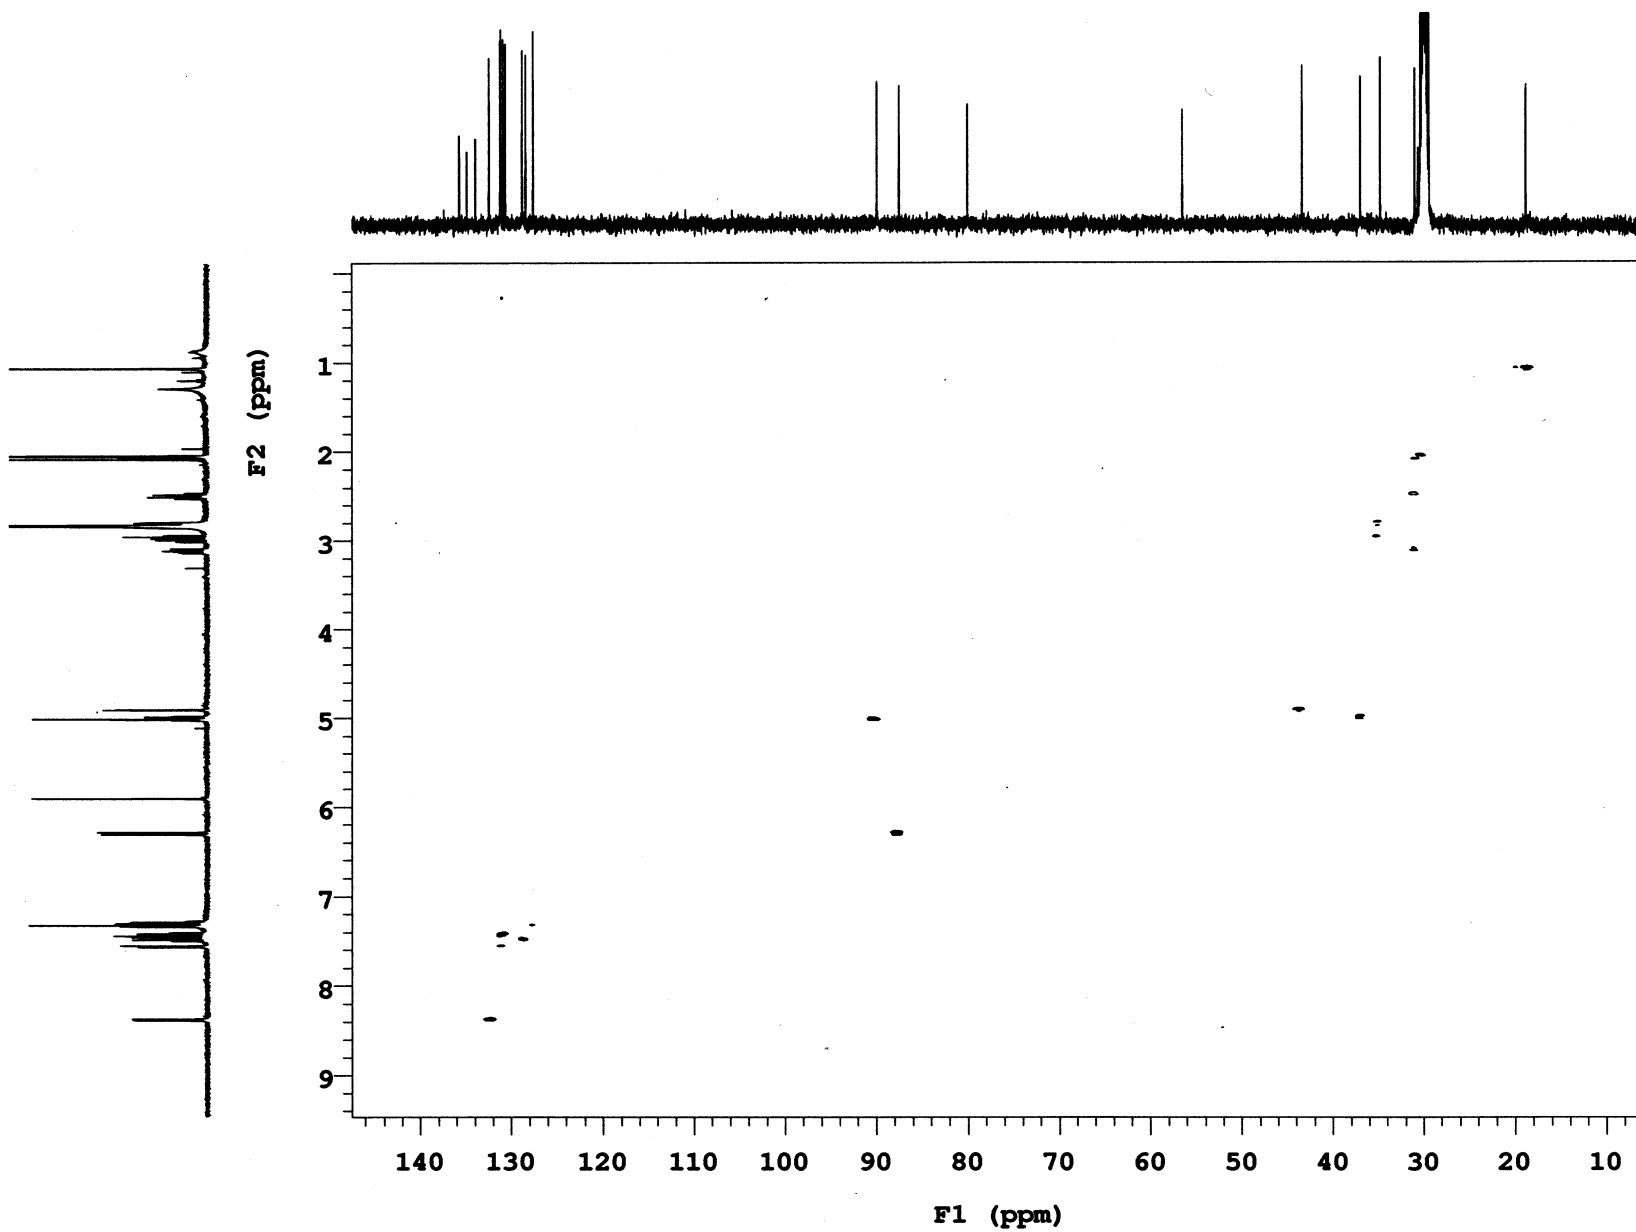

Fig S113. COSY of compound 5g.

S113

CHP-81-f1

Sample Name **CHP-81-f1**  
Date collected **2016-05-27**

Pulse sequence **gCOSY**  
Solvent **acetone**

Temperature **25**  
Spectrometer **Agilent-NMR-inova500**

Study owner **vnmr2**  
Operator **vnmr2**

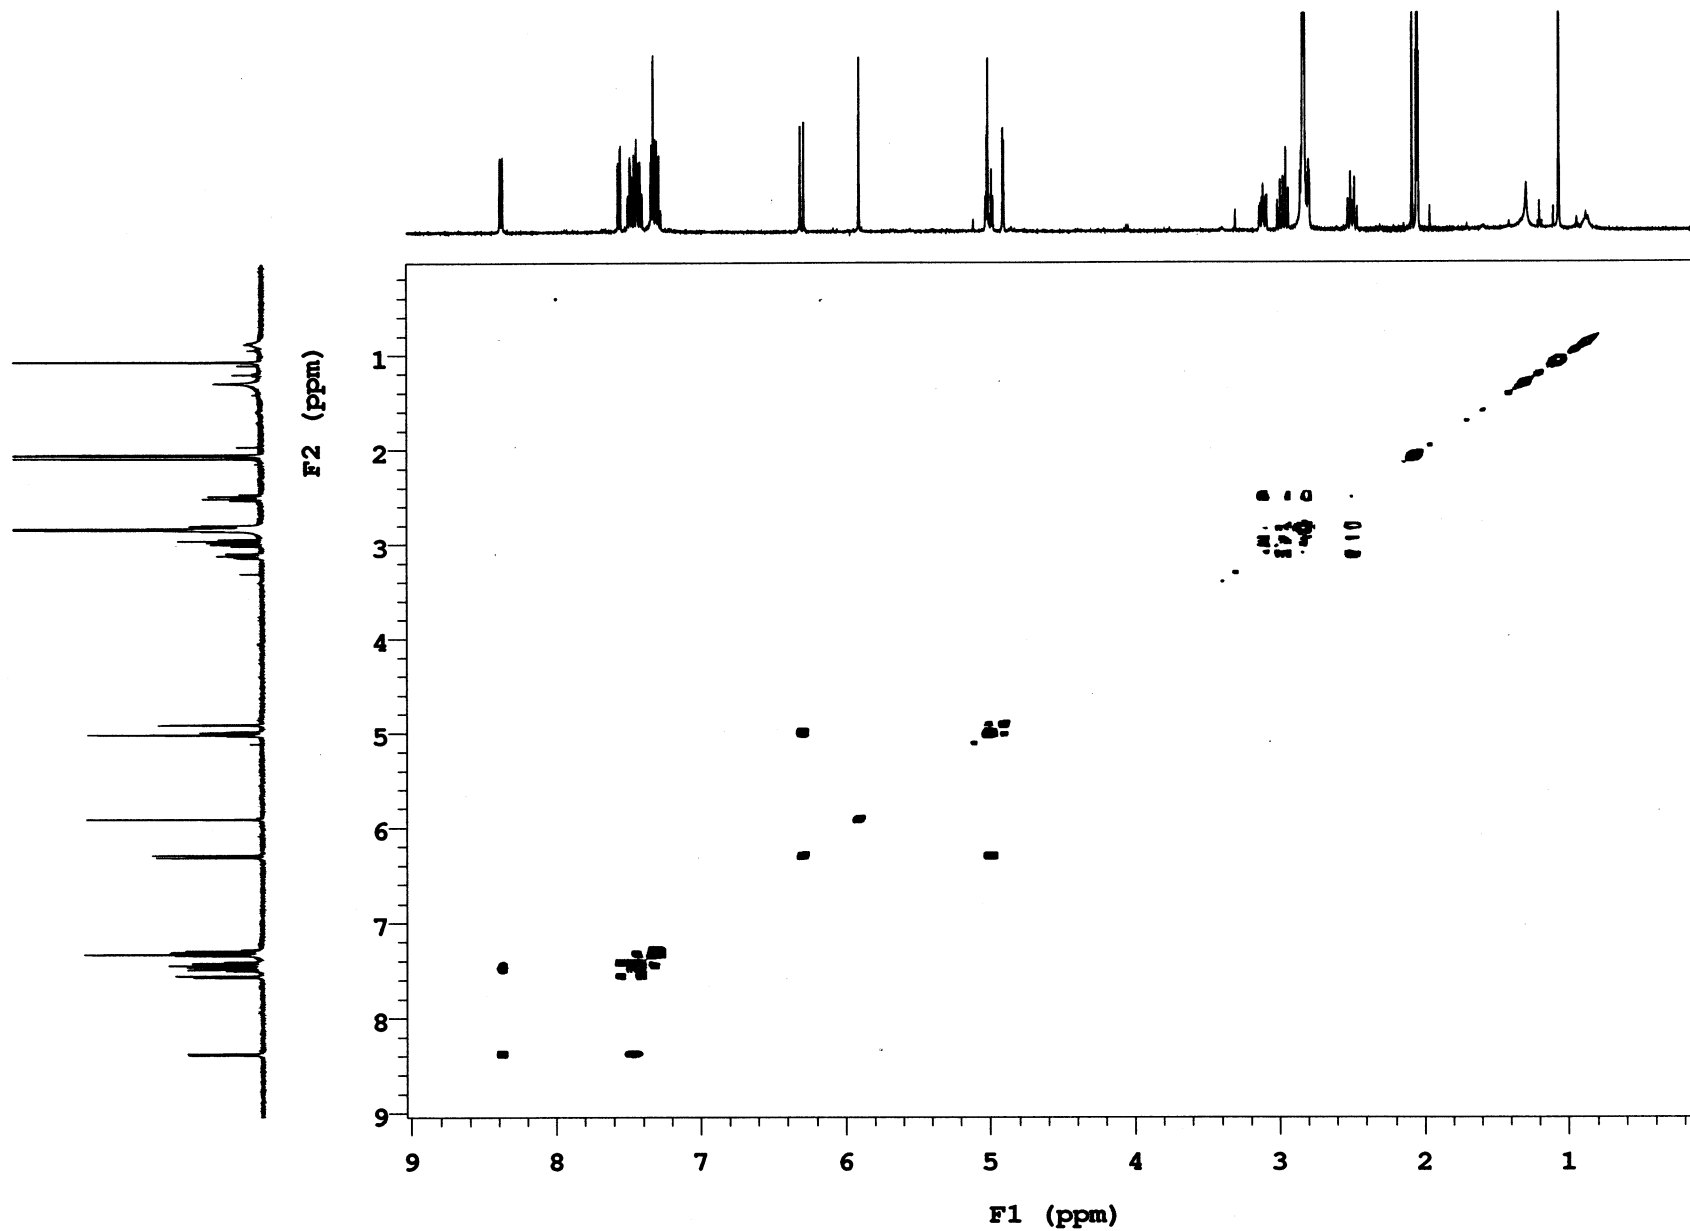

Fig S114. NOESY of compound 5g.

CHP-81-f1

Sample Name **CHP-81-f1**  
Date collected **2016-05-27**

Pulse sequence **NOESY**  
Solvent **acetone**

Temperature **25**  
Spectrometer **Agilent-NMR-inova500**

Study owner **vnmr2**  
Operator **vnmr2**

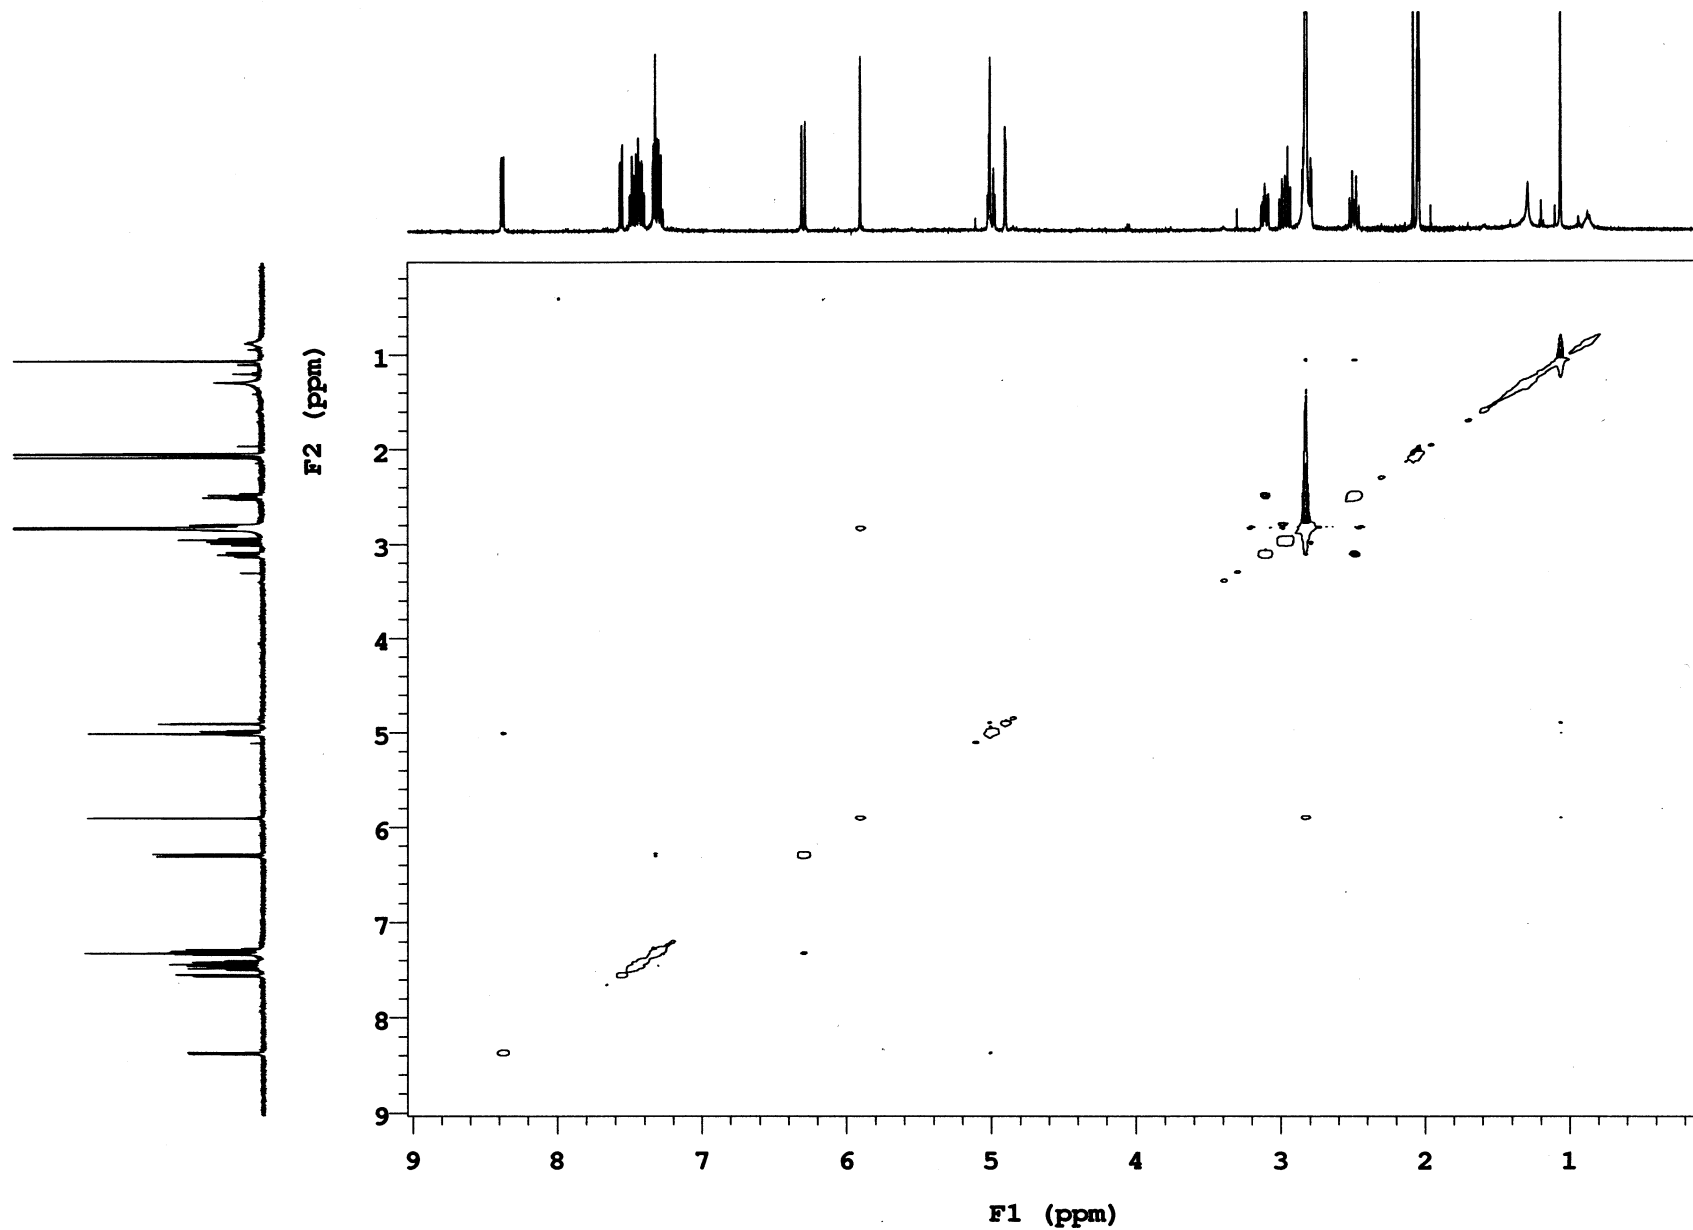

Fig S115. 1H NMR (CD3CN, 500 MHz) of compound 3h.

CHP-8f

|                |            |                |        |              |                      |             |       |
|----------------|------------|----------------|--------|--------------|----------------------|-------------|-------|
| Sample Name    | CHP-8f     | Pulse sequence | PROTON | Temperature  | 25                   | Study owner | vnmr2 |
| Date collected | 2016-02-03 | Solvent        | cd3cn  | Spectrometer | Agilent-NMR-inova500 | Operator    | vnmr2 |

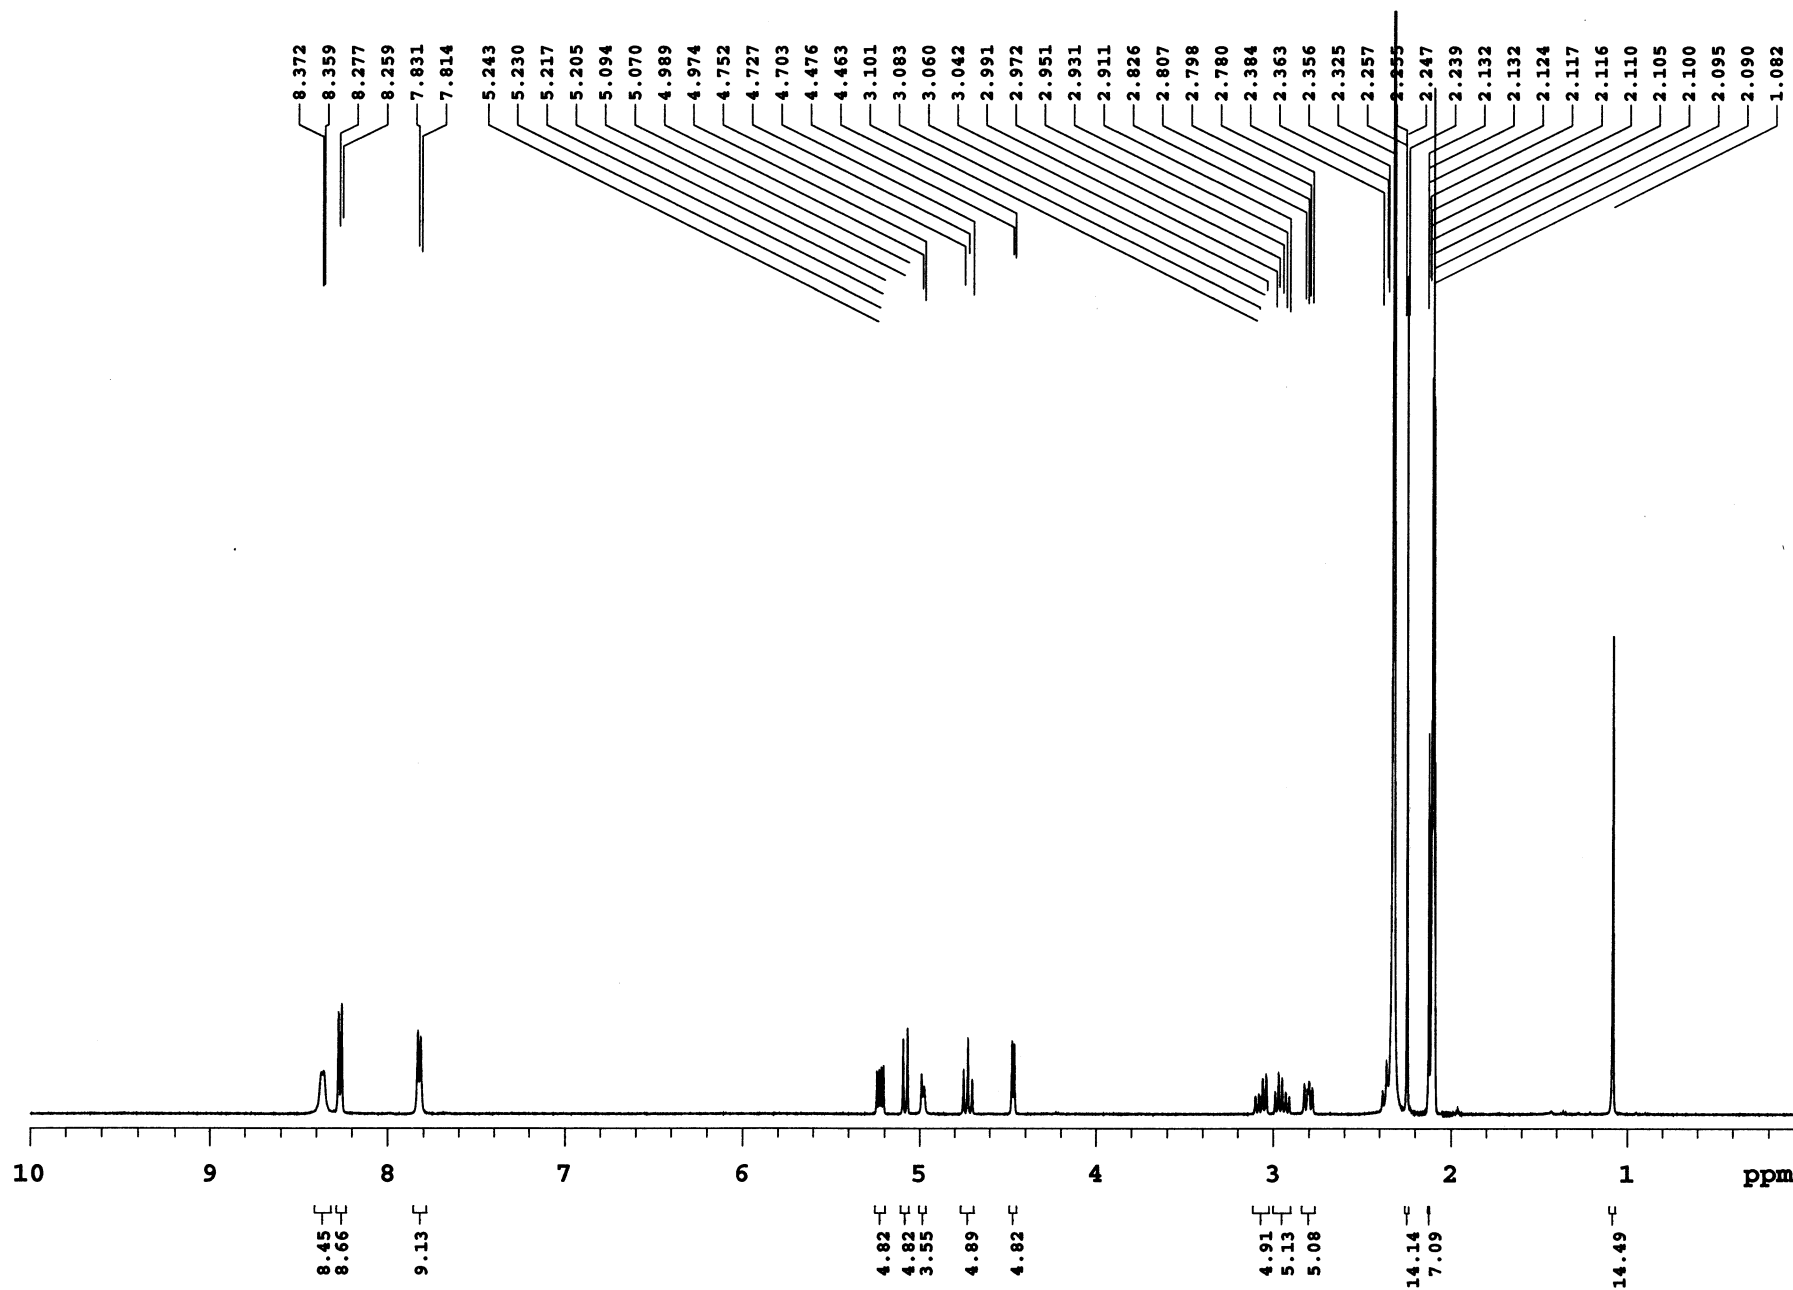

Sample Name **CHP-8f**  
Date collected **2016-02-03**Pulse sequence **CARBON**  
Solvent **cd3cn**Temperature **25**  
Spectrometer **Agilent-NMR-inova500**Study owner **vnmr2**  
Operator **vnmr2**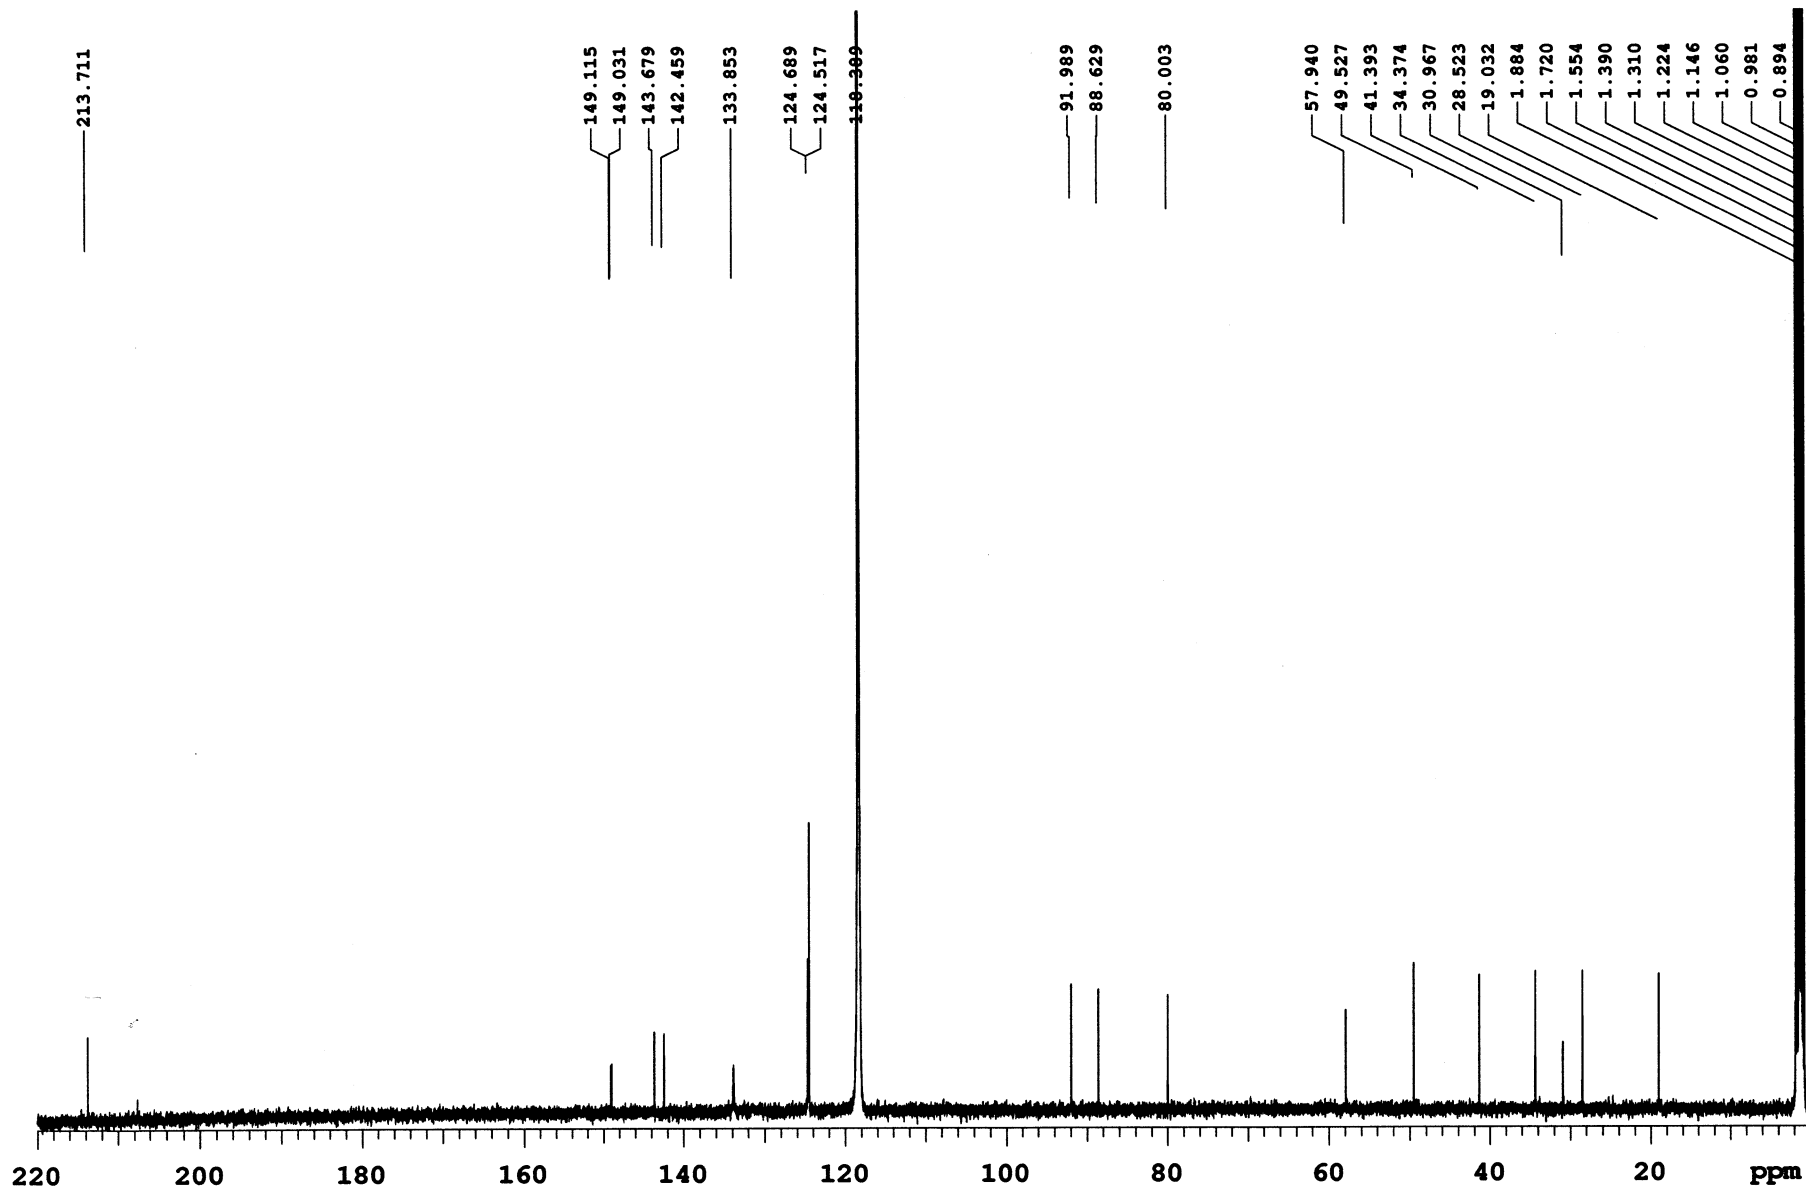Fig S116.  $^{13}\text{C}$  NMR ( $\text{CD}_3\text{CN}$ , 125 MHz) of compound 3h.



Sample Name **CHP-8f**  
Date collected **2016-02-04**

Pulse sequence **DEPT**  
Solvent **cd3cn**

Temperature **25**  
Spectrometer **Agilent-NMR-inova500**

Study owner **vnmr2**  
Operator **vnmr2**

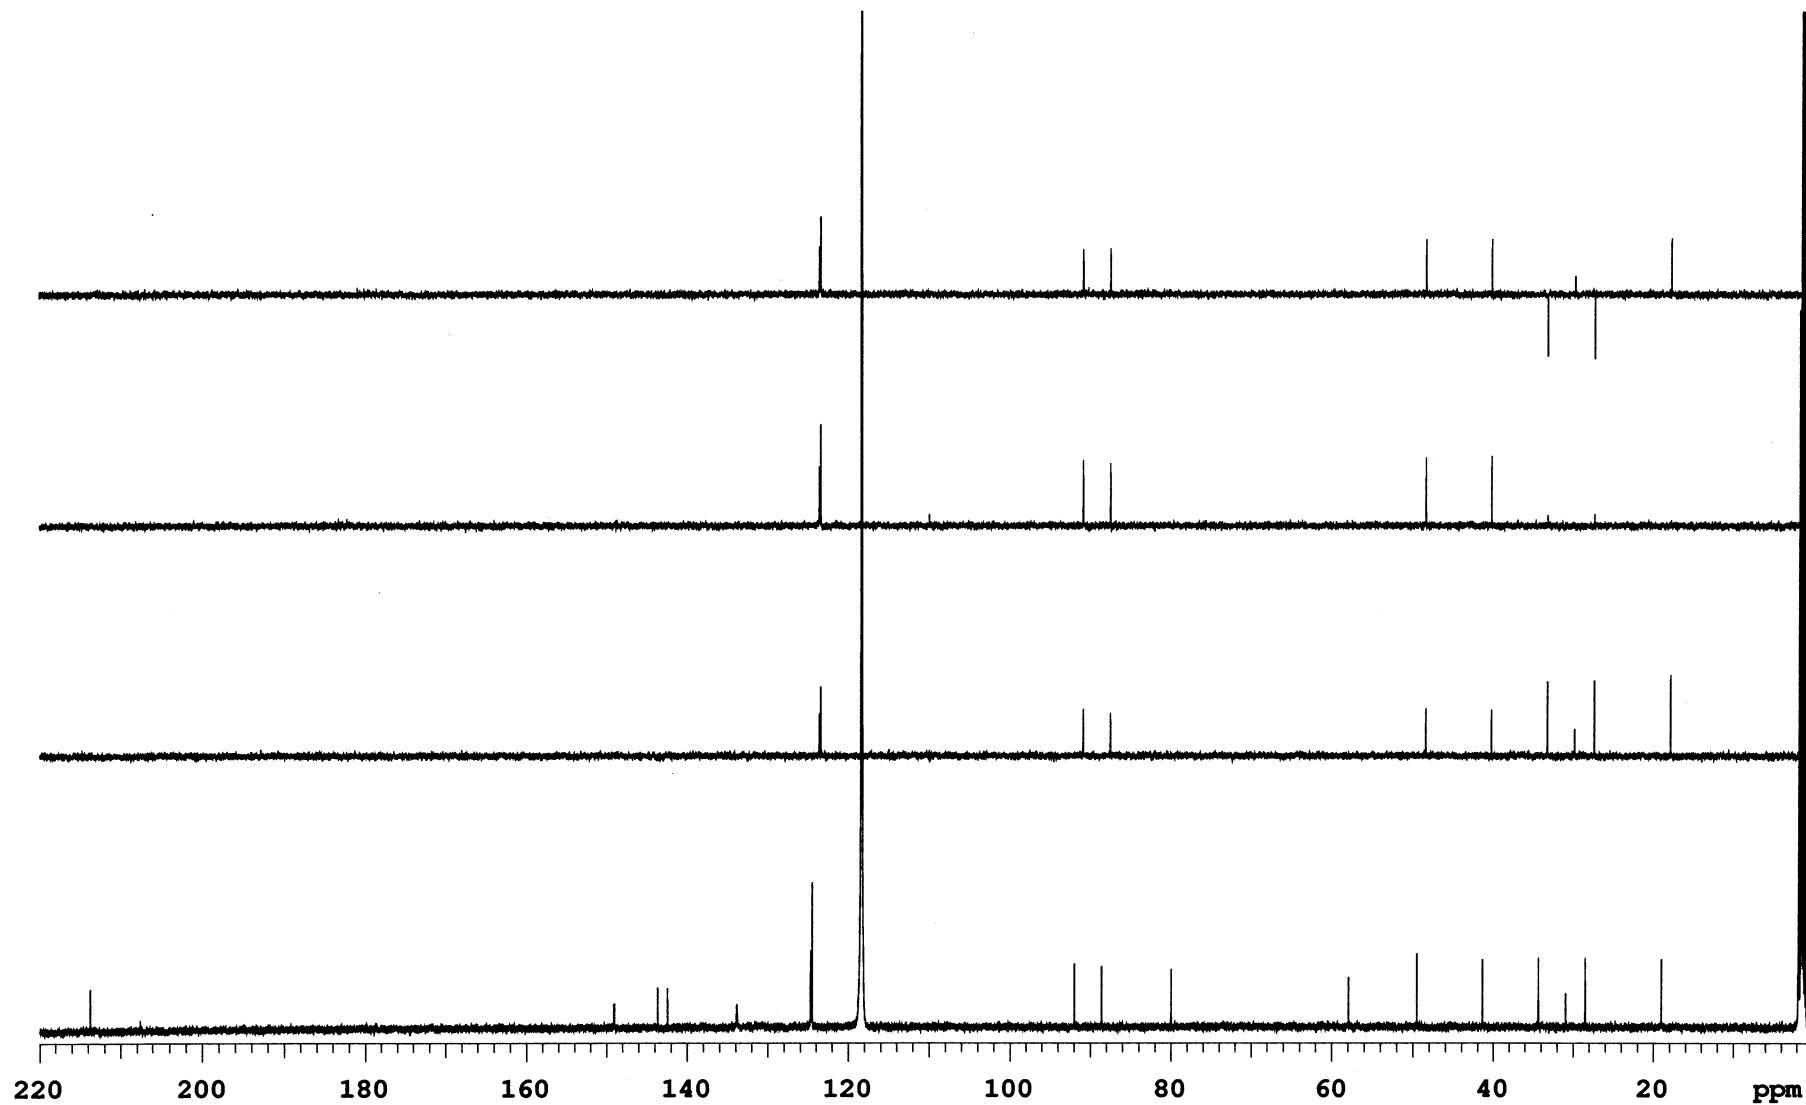

Fig S117. DEPT of compound 3h.

Sample Name **CHP-8f**  
 Date collected **2016-02-04**

Pulse sequence **gHSQC**  
 Solvent **cd3cn**

Temperature **25**  
 Spectrometer **Agilent-NMR-inova500**

Study owner **vnmr2**  
 Operator **vnmr2**

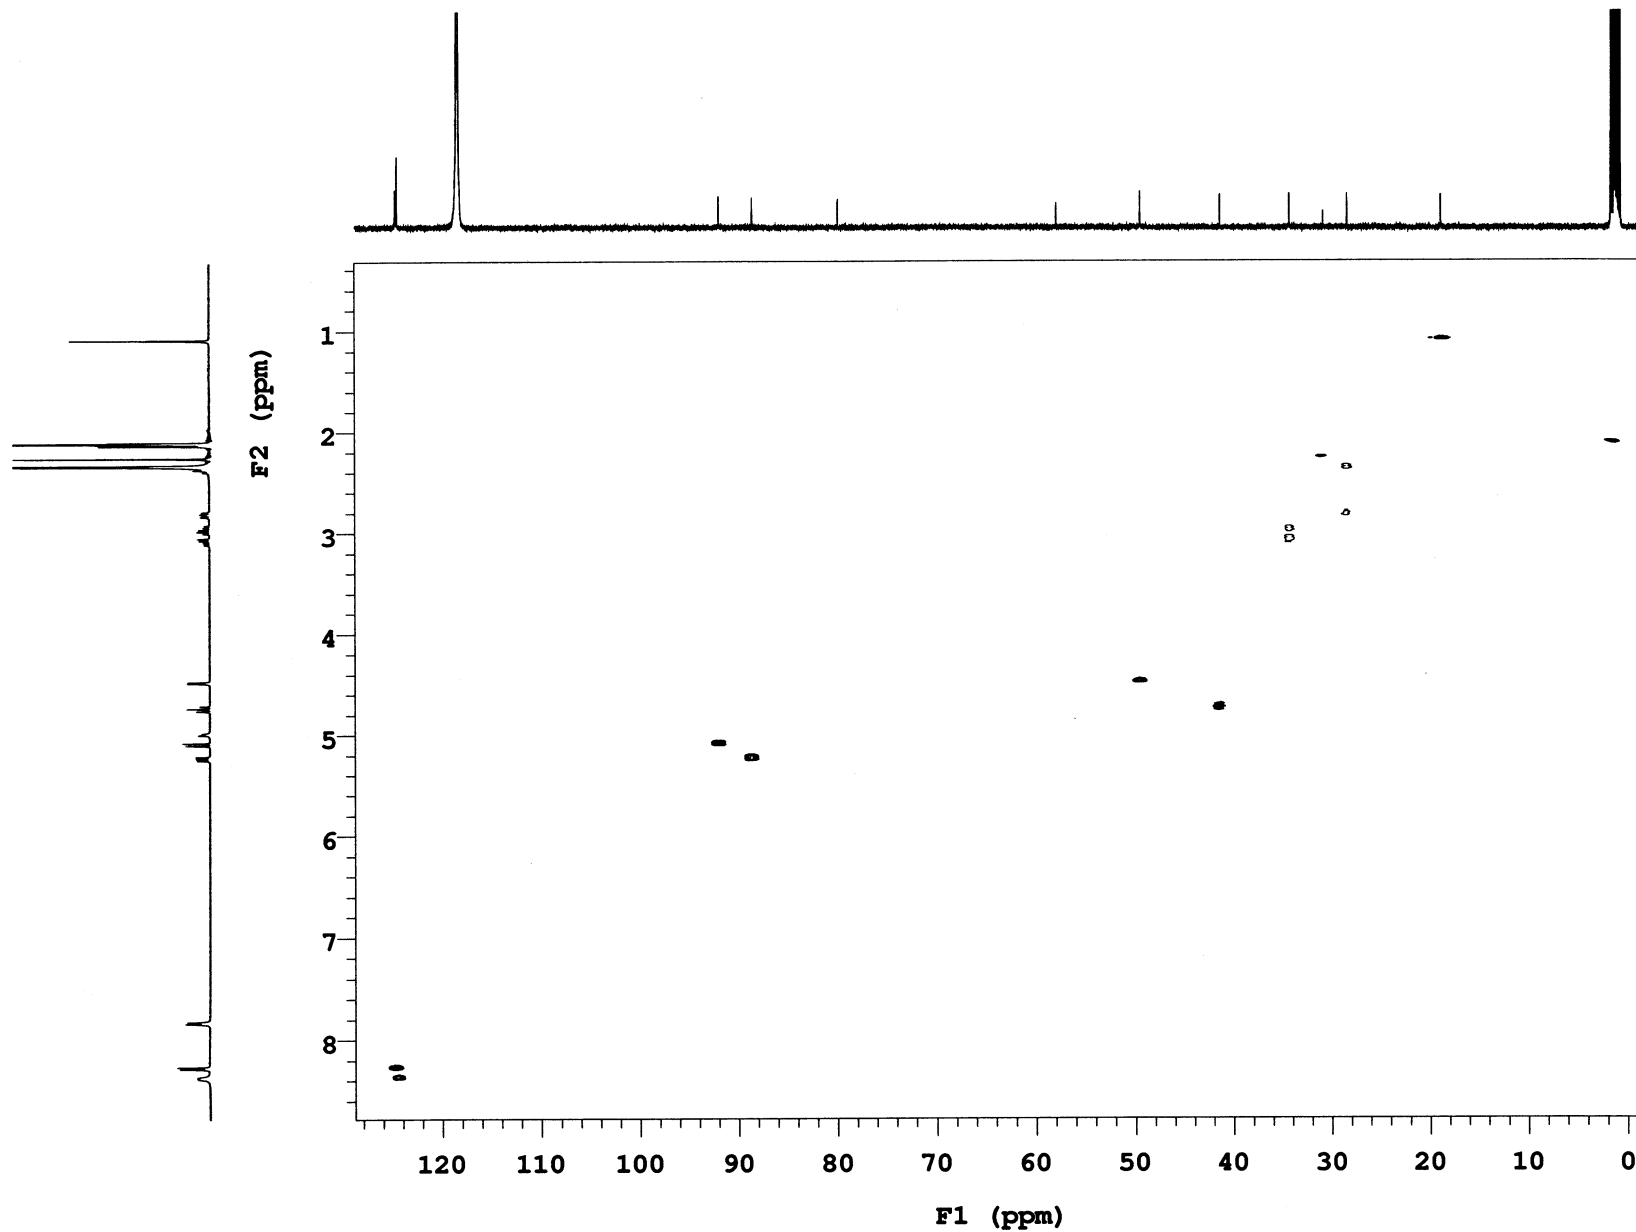

Fig S118. HSQC of compound 3h.



Sample Name **CHP-8f**  
Date collected **2016-02-04**

Pulse sequence **NOESY**  
Solvent **cd3cn**

Temperature **25**  
Spectrometer **Agilent-NMR-inova500**

Study owner **vnmr2**  
Operator **vnmr2**

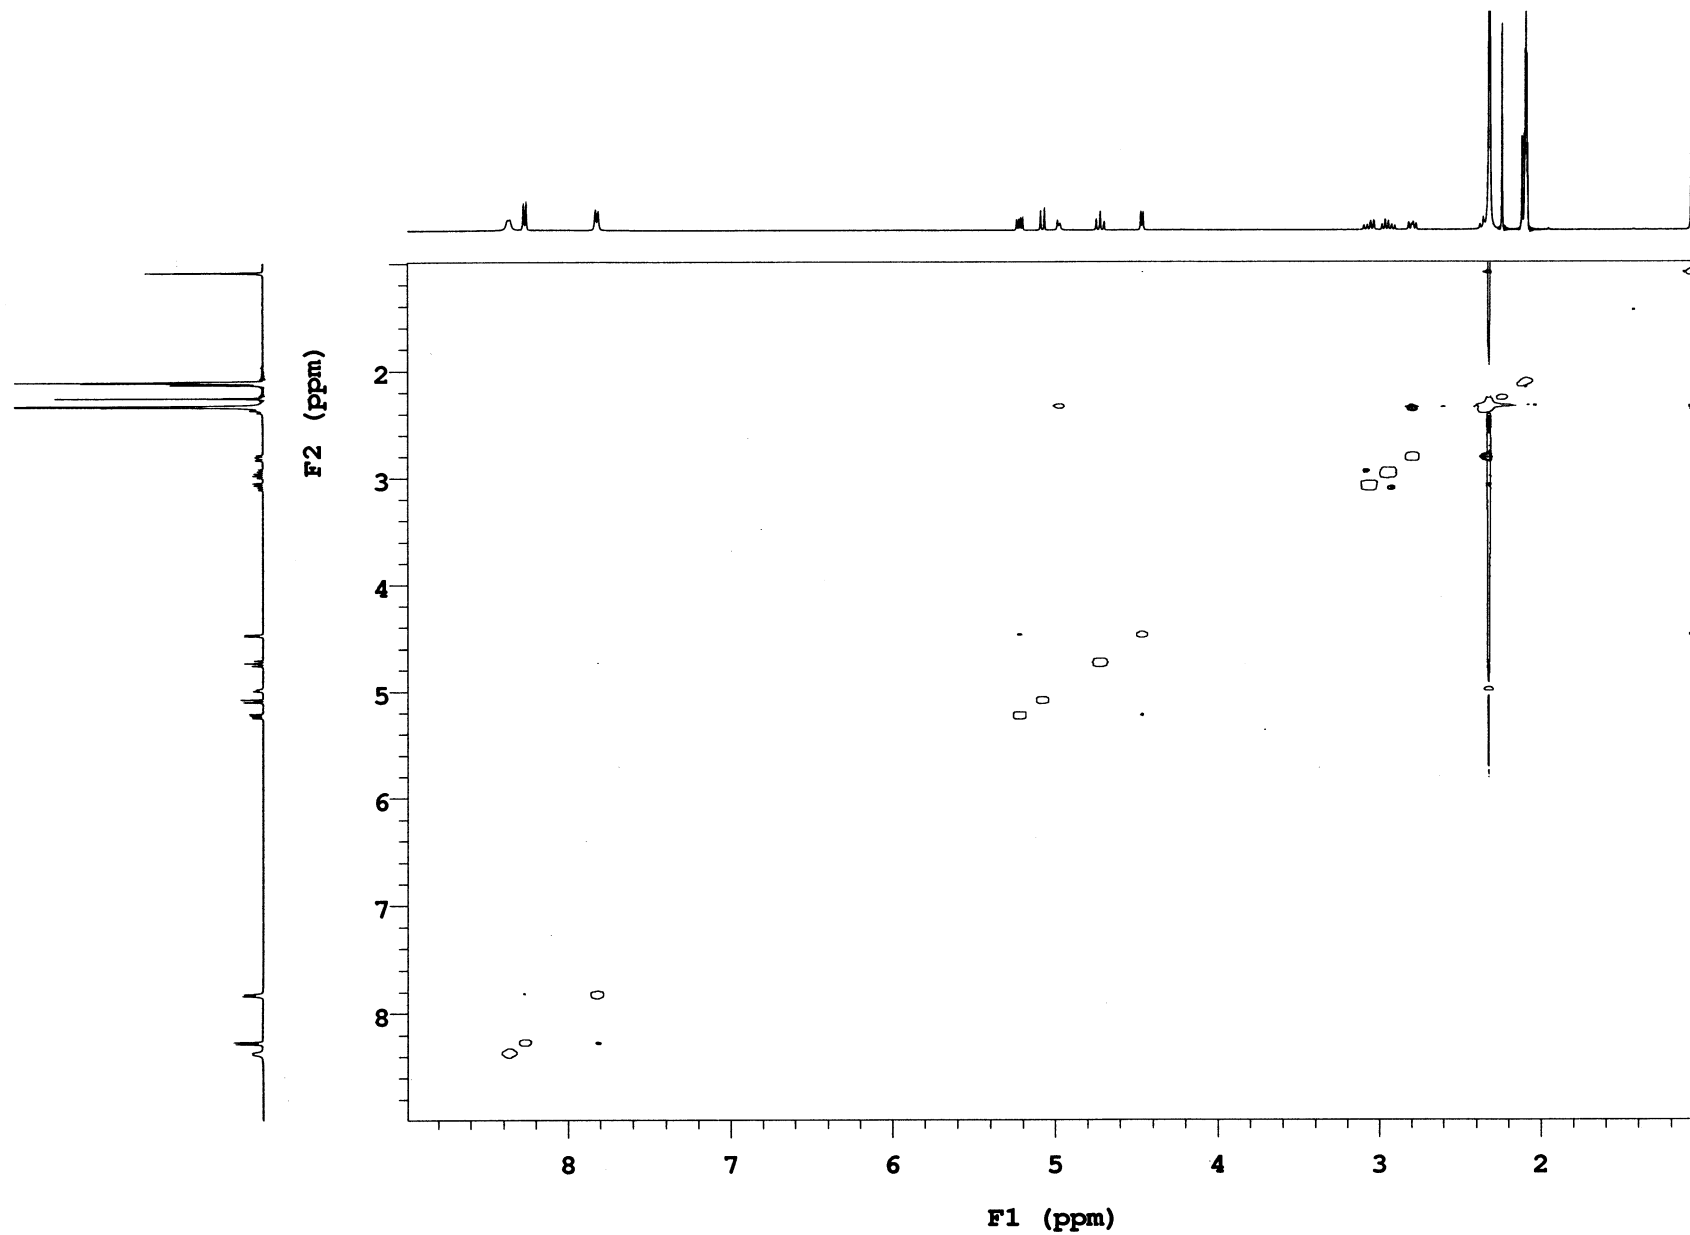

Fig S120. NOESY of compound 3h.

Fig S121. <sup>1</sup>H NMR (CH<sub>3</sub>CN, 500 MHz) of compound 5h

S121

CHP-8f-f3

|                |            |                |        |              |                      |             |       |
|----------------|------------|----------------|--------|--------------|----------------------|-------------|-------|
| Sample Name    | CHP-8f-f3  | Pulse sequence | PROTON | Temperature  | 25                   | Study owner | vnmr2 |
| Date collected | 2016-05-20 | Solvent        | cd3cn  | Spectrometer | Agilent-NMR-inova500 | Operator    | vnmr2 |

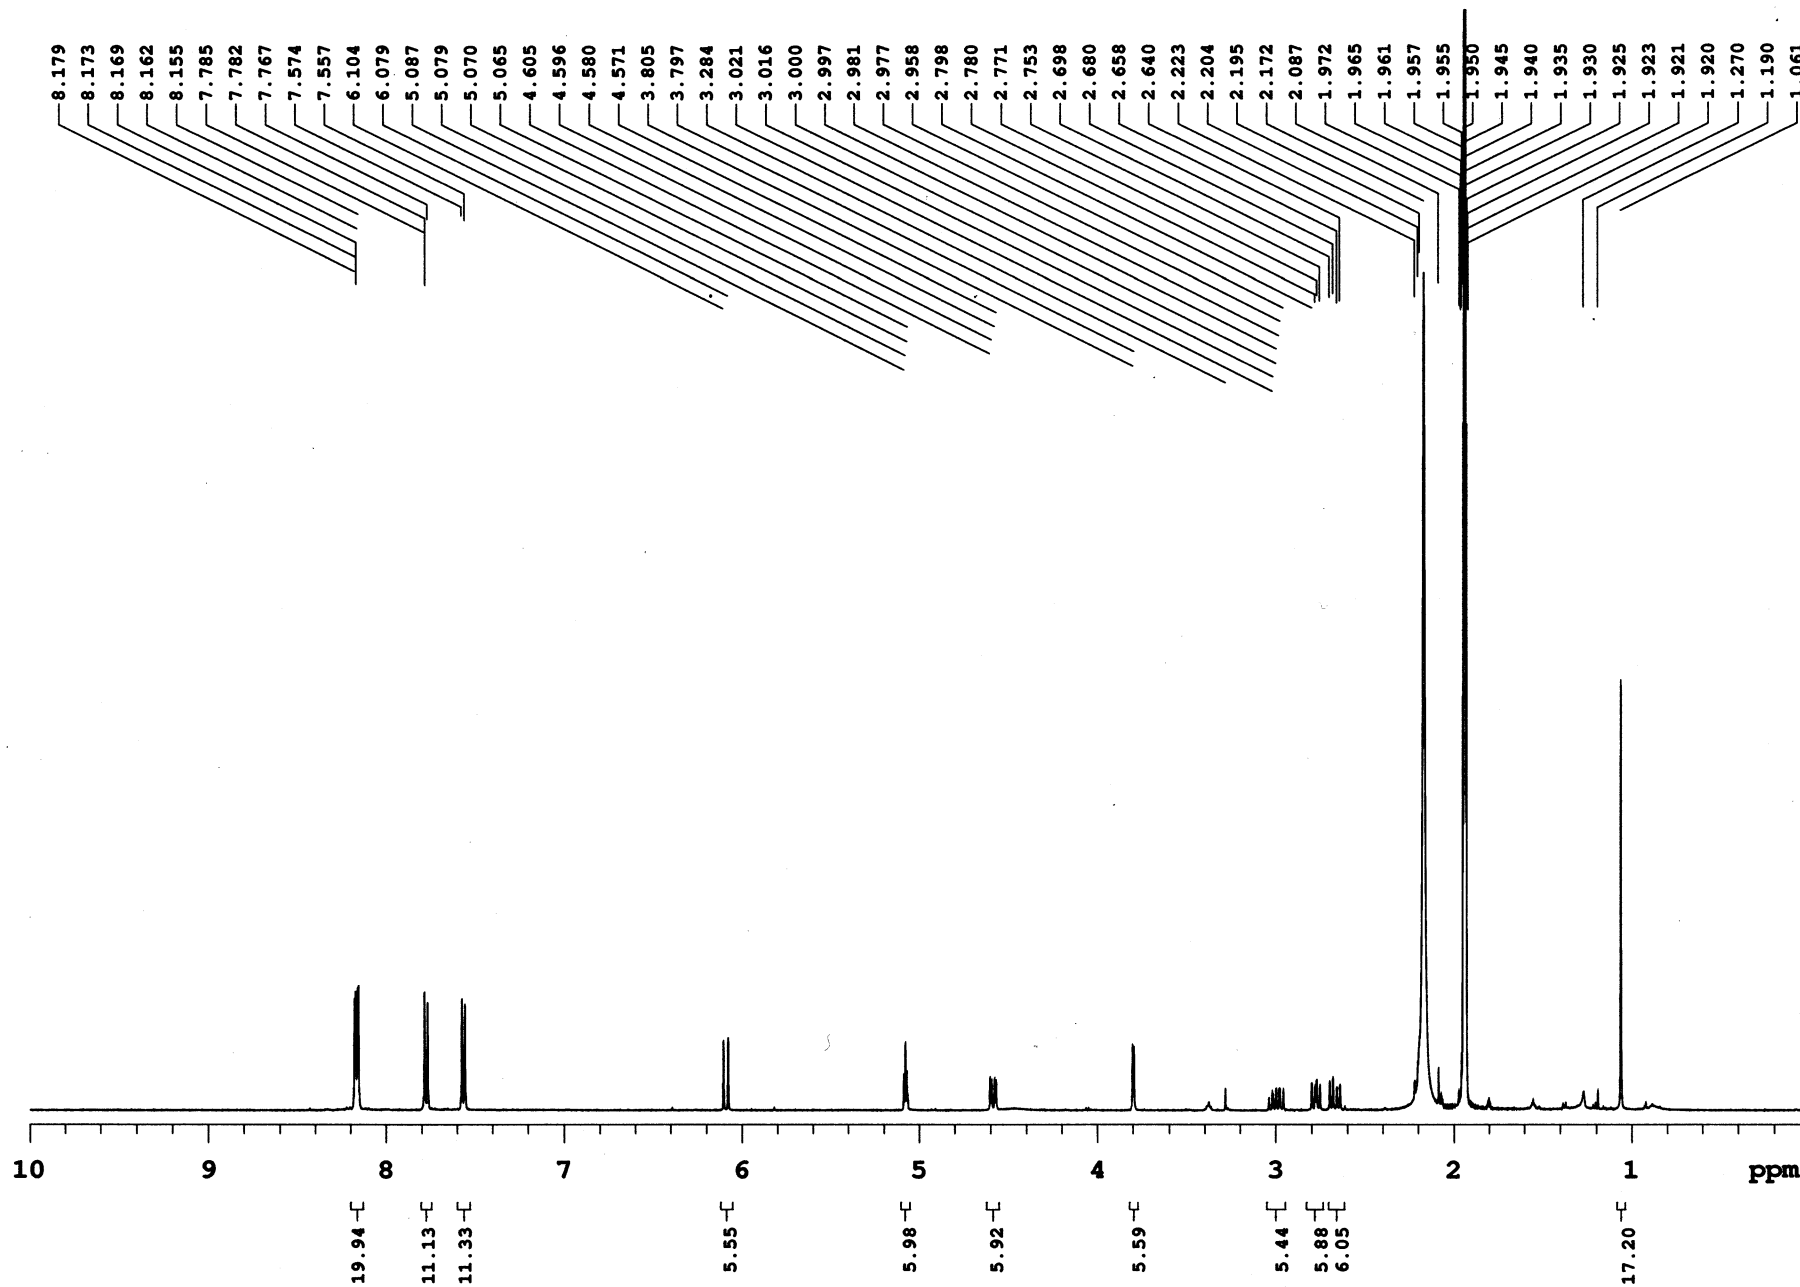

Fig S122. <sup>13</sup>C NMR (CH<sub>3</sub>CN, 125 MHz) of compound 5h

S122

CHP-8f-f3

Sample Name **CHP-8f-f3**  
Date collected **2016-05-20**

Pulse sequence **CARBON**  
Solvent **cd3cn**

Temperature **25**  
Spectrometer **Agilent-NMR-inova500**

Study owner **vnmr2**  
Operator **vnmr2**

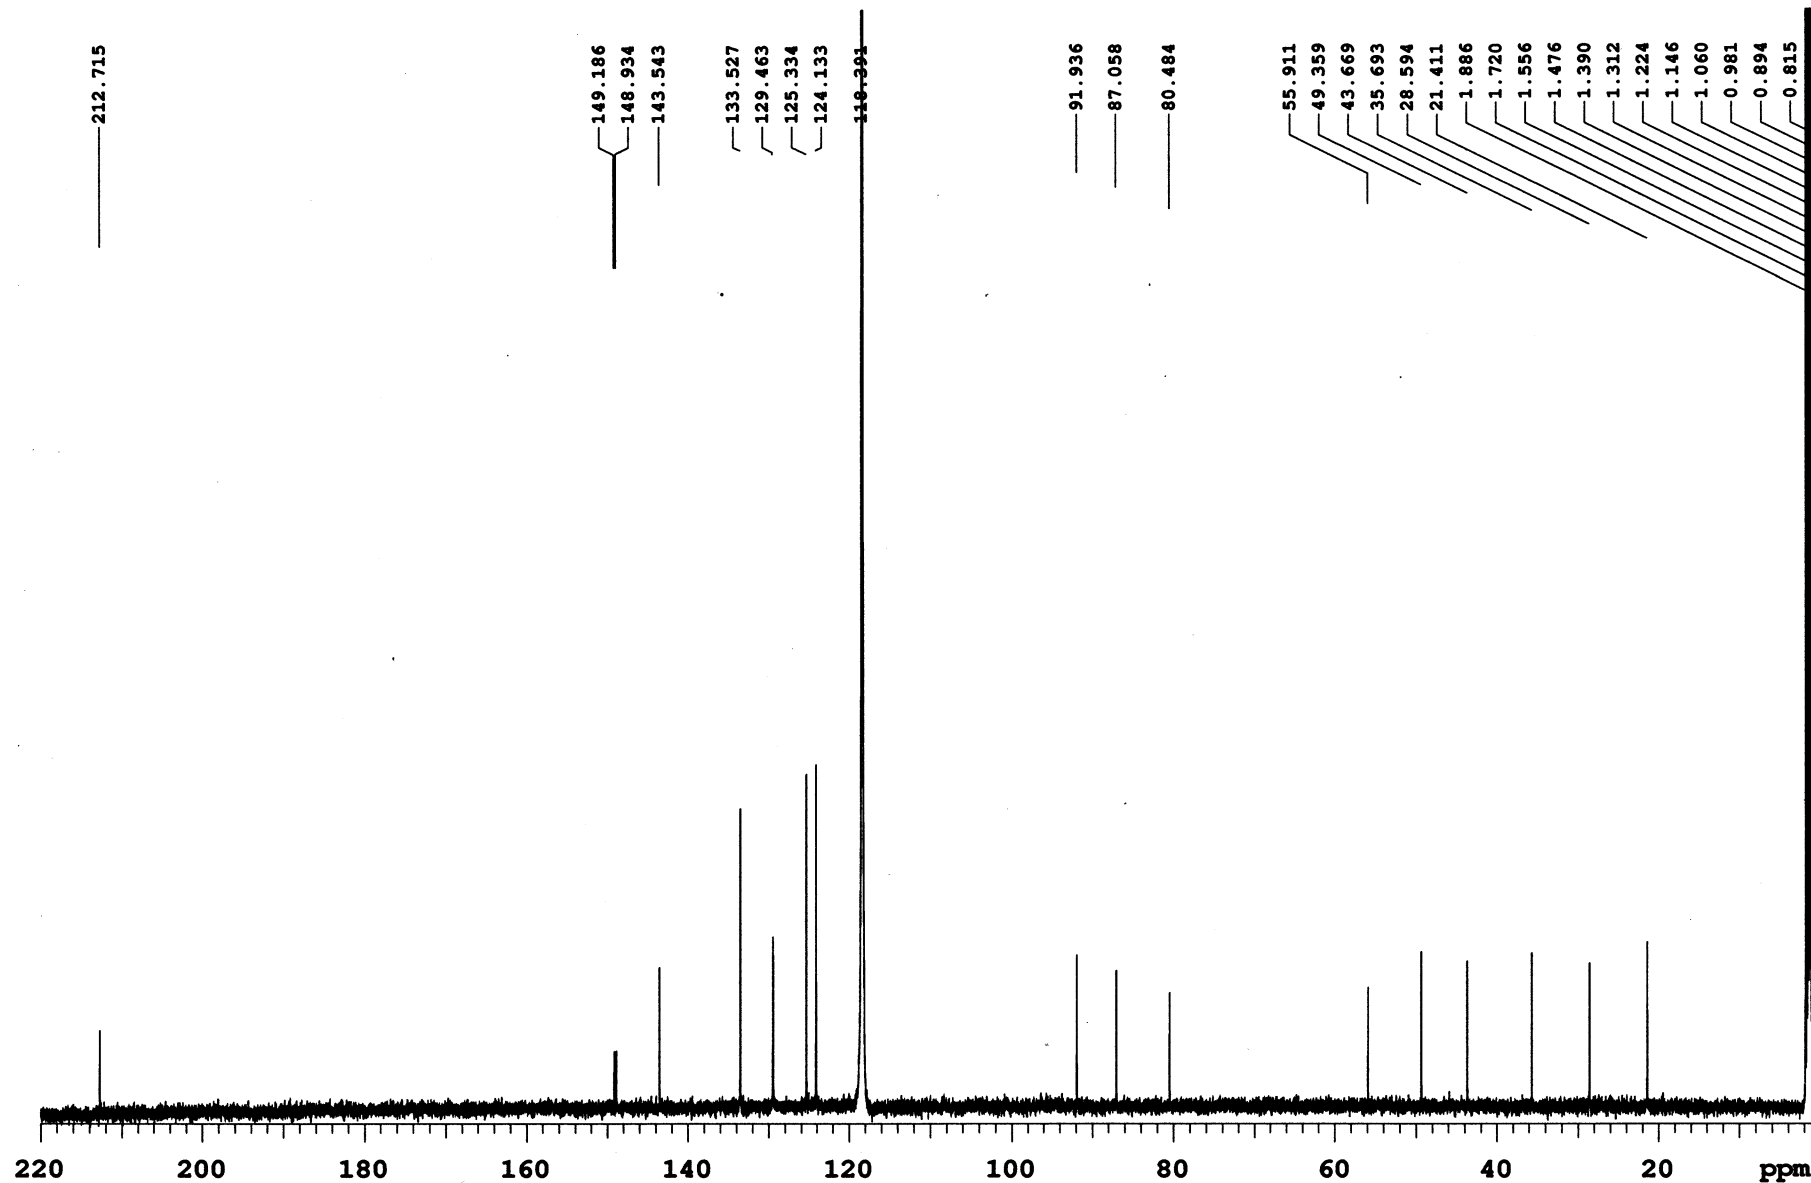

Fig S123. DEPT of compound 5h

S123

CHP-8f-f3

Sample Name **CHP-8f-f3**  
Date collected **2016-05-21**

Pulse sequence **DEPT**  
Solvent **cd3cn**

Temperature **25**  
Spectrometer **Agilent-NMR-inova500**

Study owner **vnmr2**  
Operator **vnmr2**

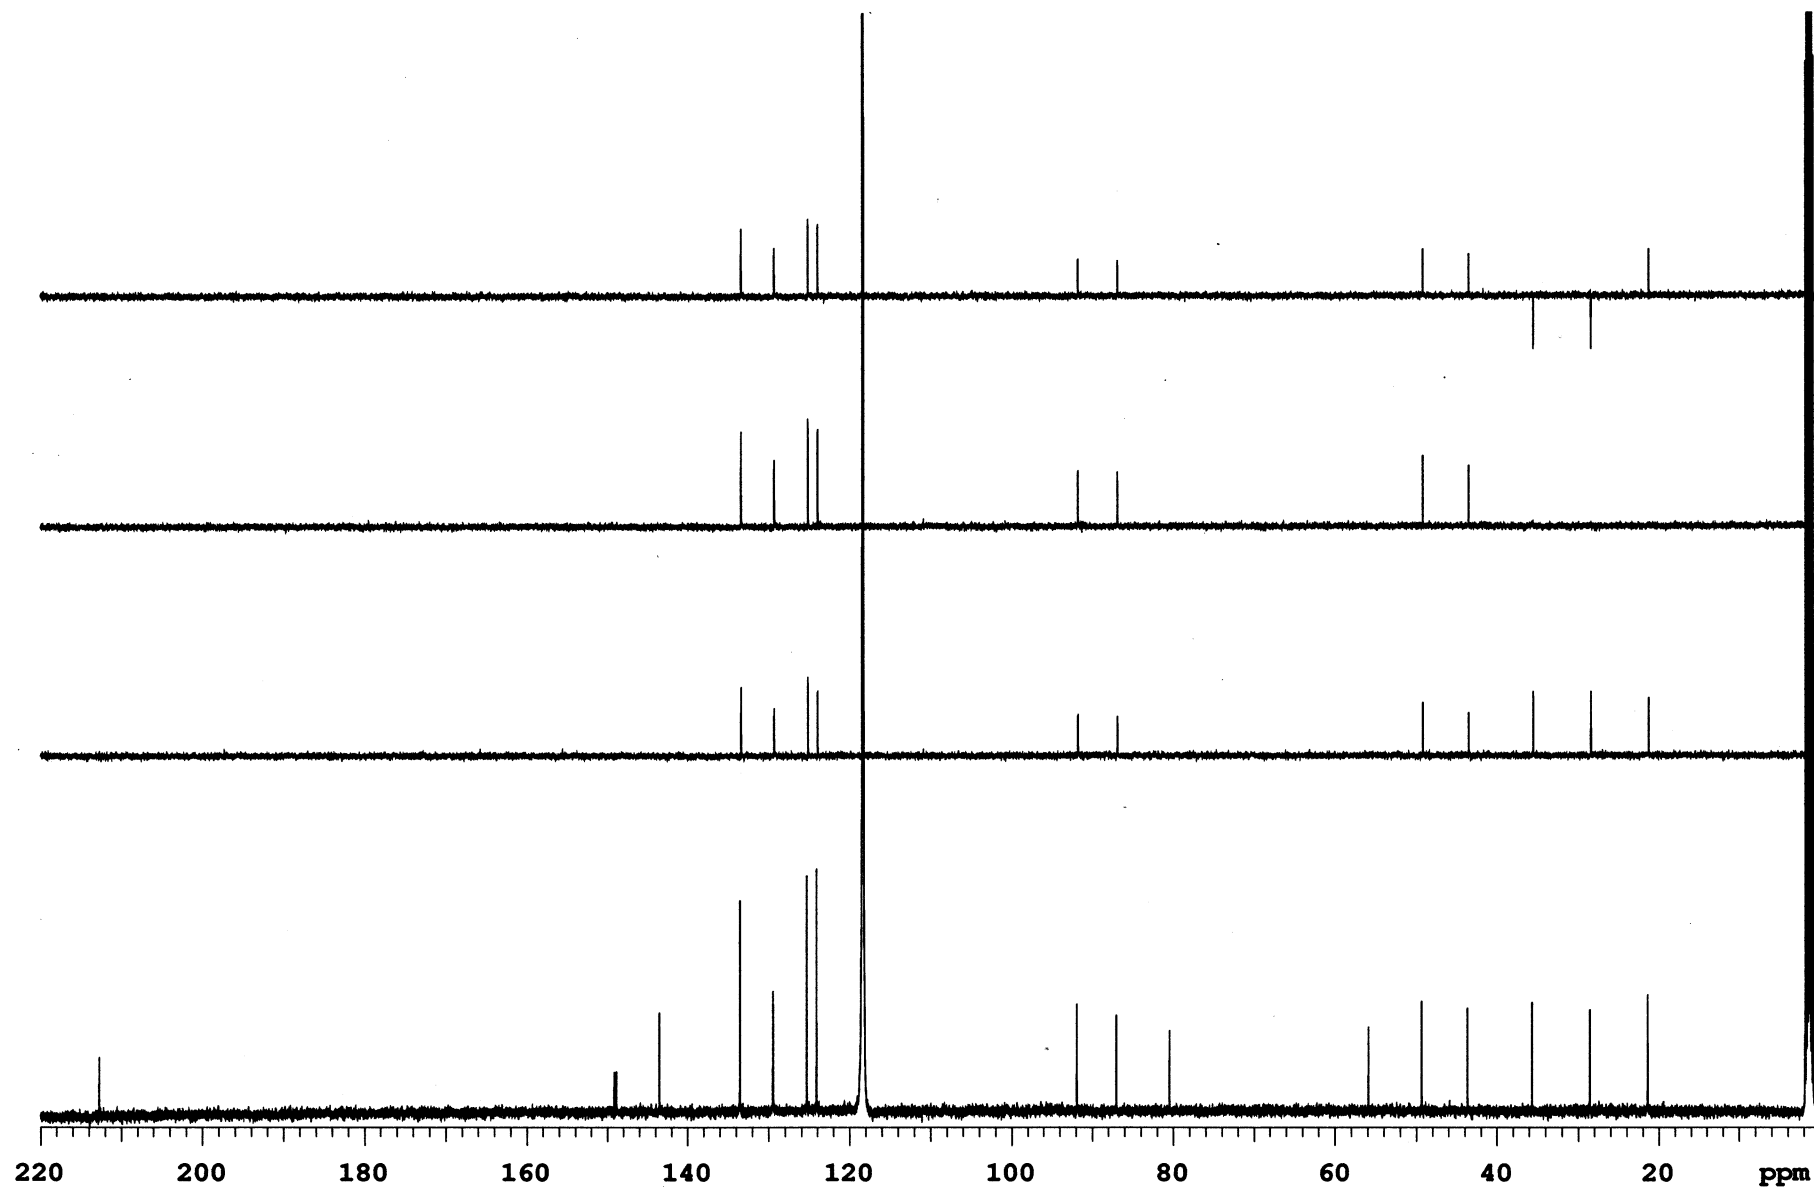

Fig S124. HSQC of compound 5h

S124

CHP-8f-f3

Sample Name **CHP-8f-f3**  
Date collected **2016-05-21**

Pulse sequence **gHSQC**  
Solvent **cd3cn**

Temperature **25**  
Spectrometer **Agilent-NMR-inova500**

Study owner **vnmr2**  
Operator **vnmr2**

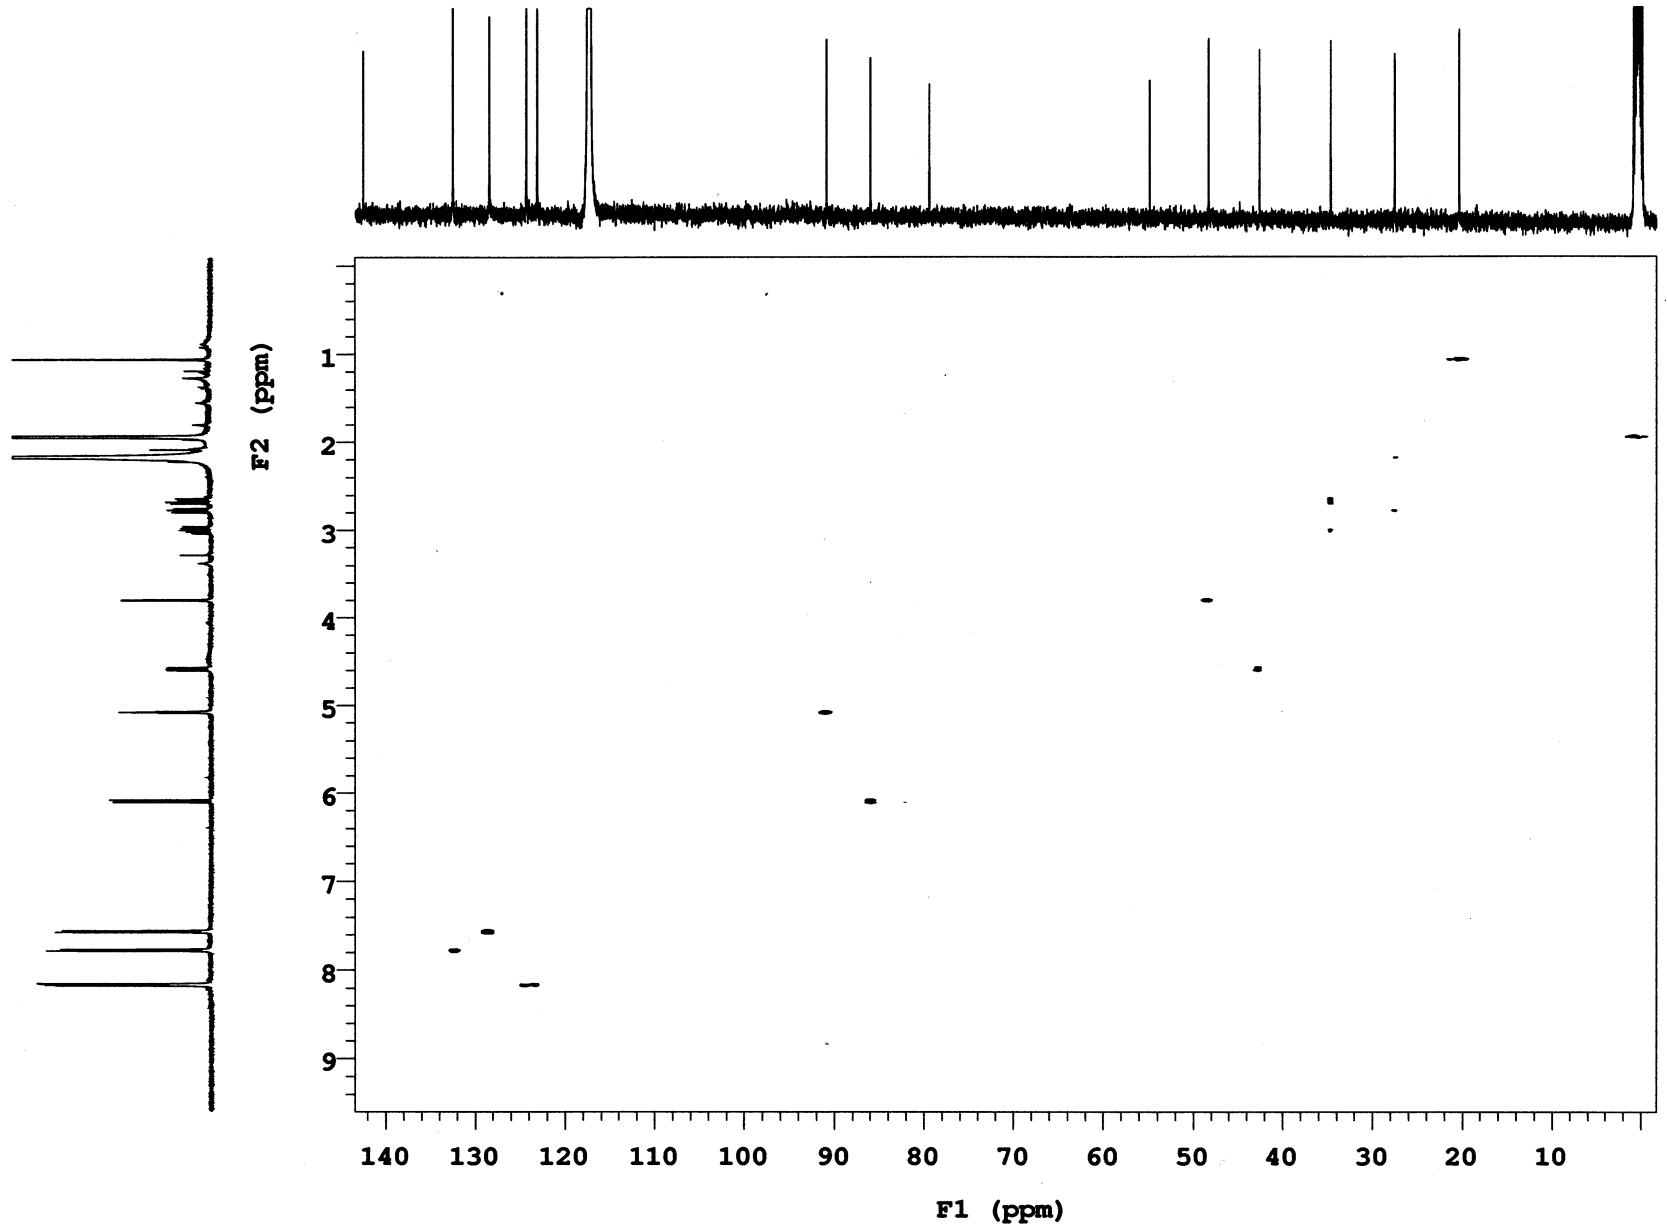



Fig S125. COSY of compound 5h

CHP-8f-f3

Sample Name **CHP-8f-f3**  
Date collected **2016-05-21**

Pulse sequence **gCOSY**  
Solvent **cd3cn**

Temperature **25**  
Spectrometer **Agilent-NMR-inova500**

Study owner **vnmr2**  
Operator **vnmr2**

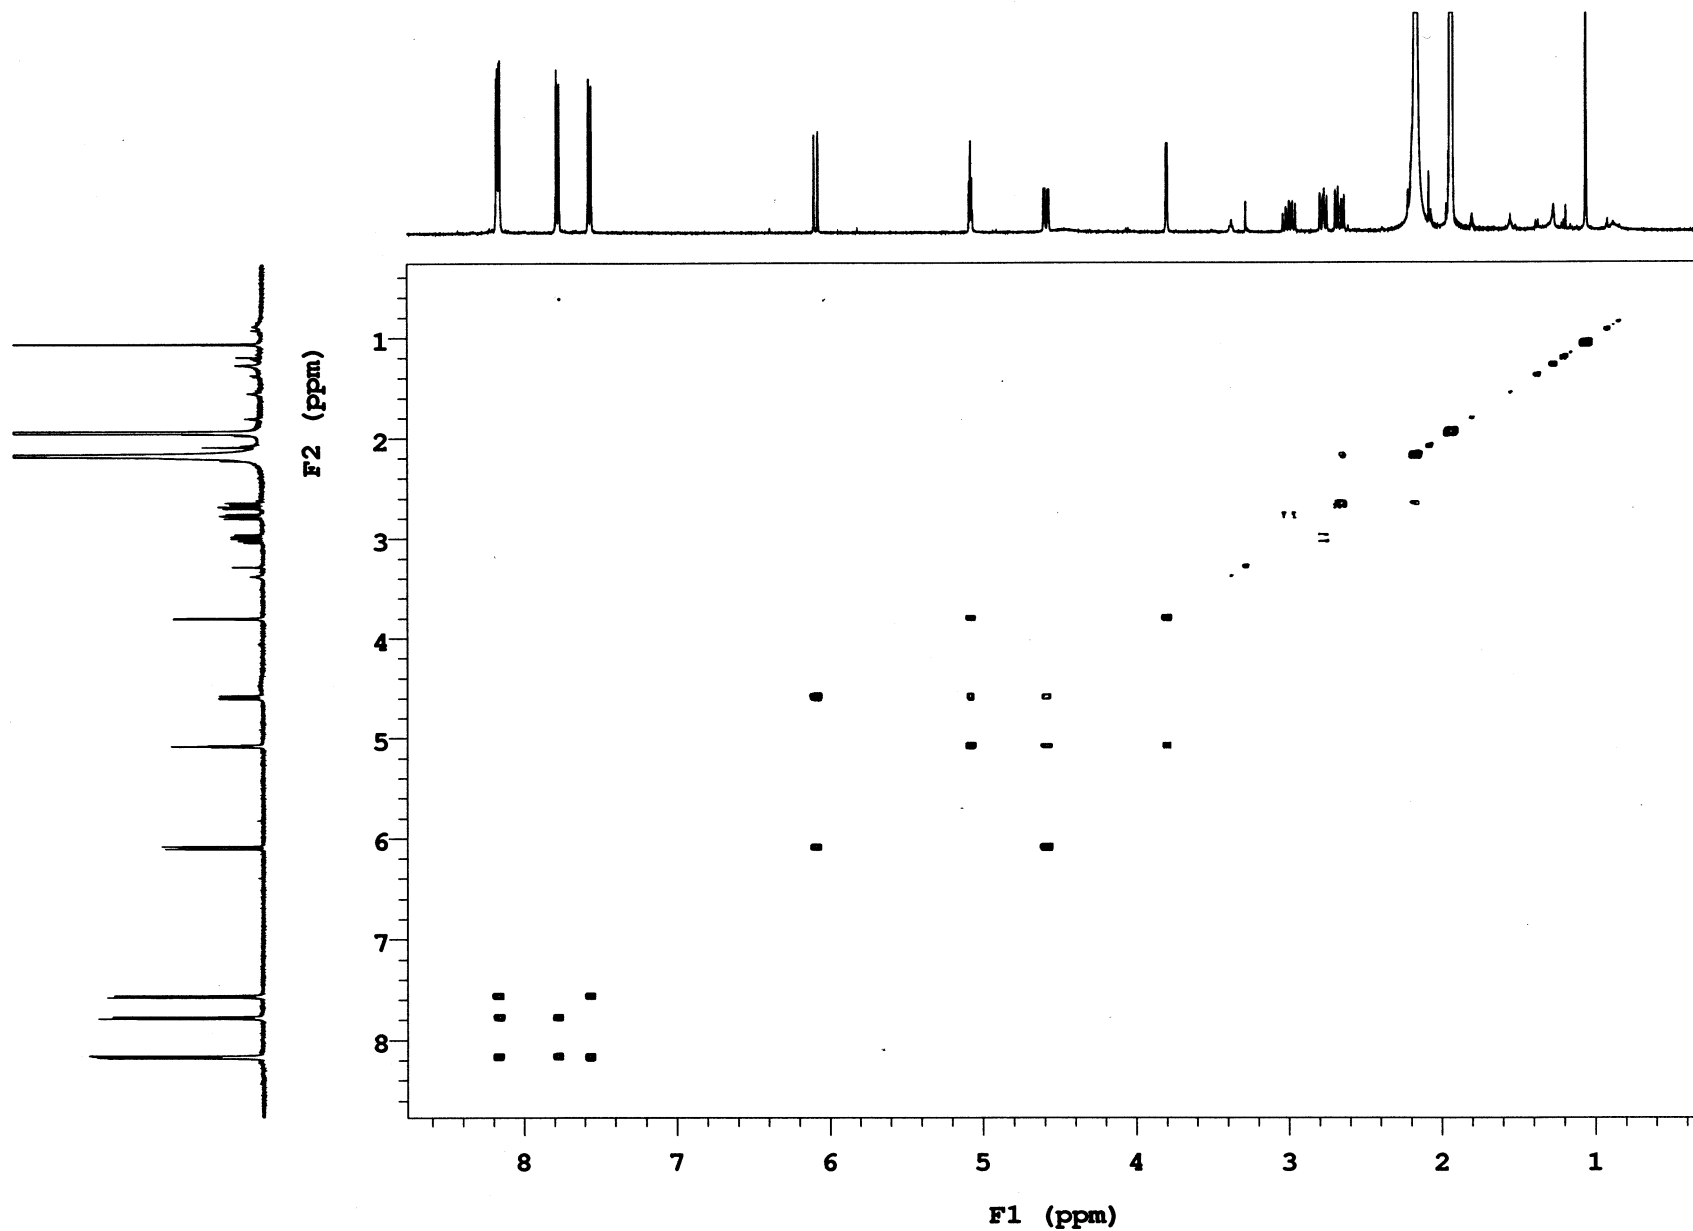

Fig S126. NOESY of compound 5h

S126

CHP-8f-f3

Sample Name **CHP-8f-f3**  
Date collected **2016-05-21**

Pulse sequence **NOESY**  
Solvent **cd3cn**

Temperature **25**  
Spectrometer **Agilent-NMR-inova500**

Study owner **vnmr2**  
Operator **vnmr2**

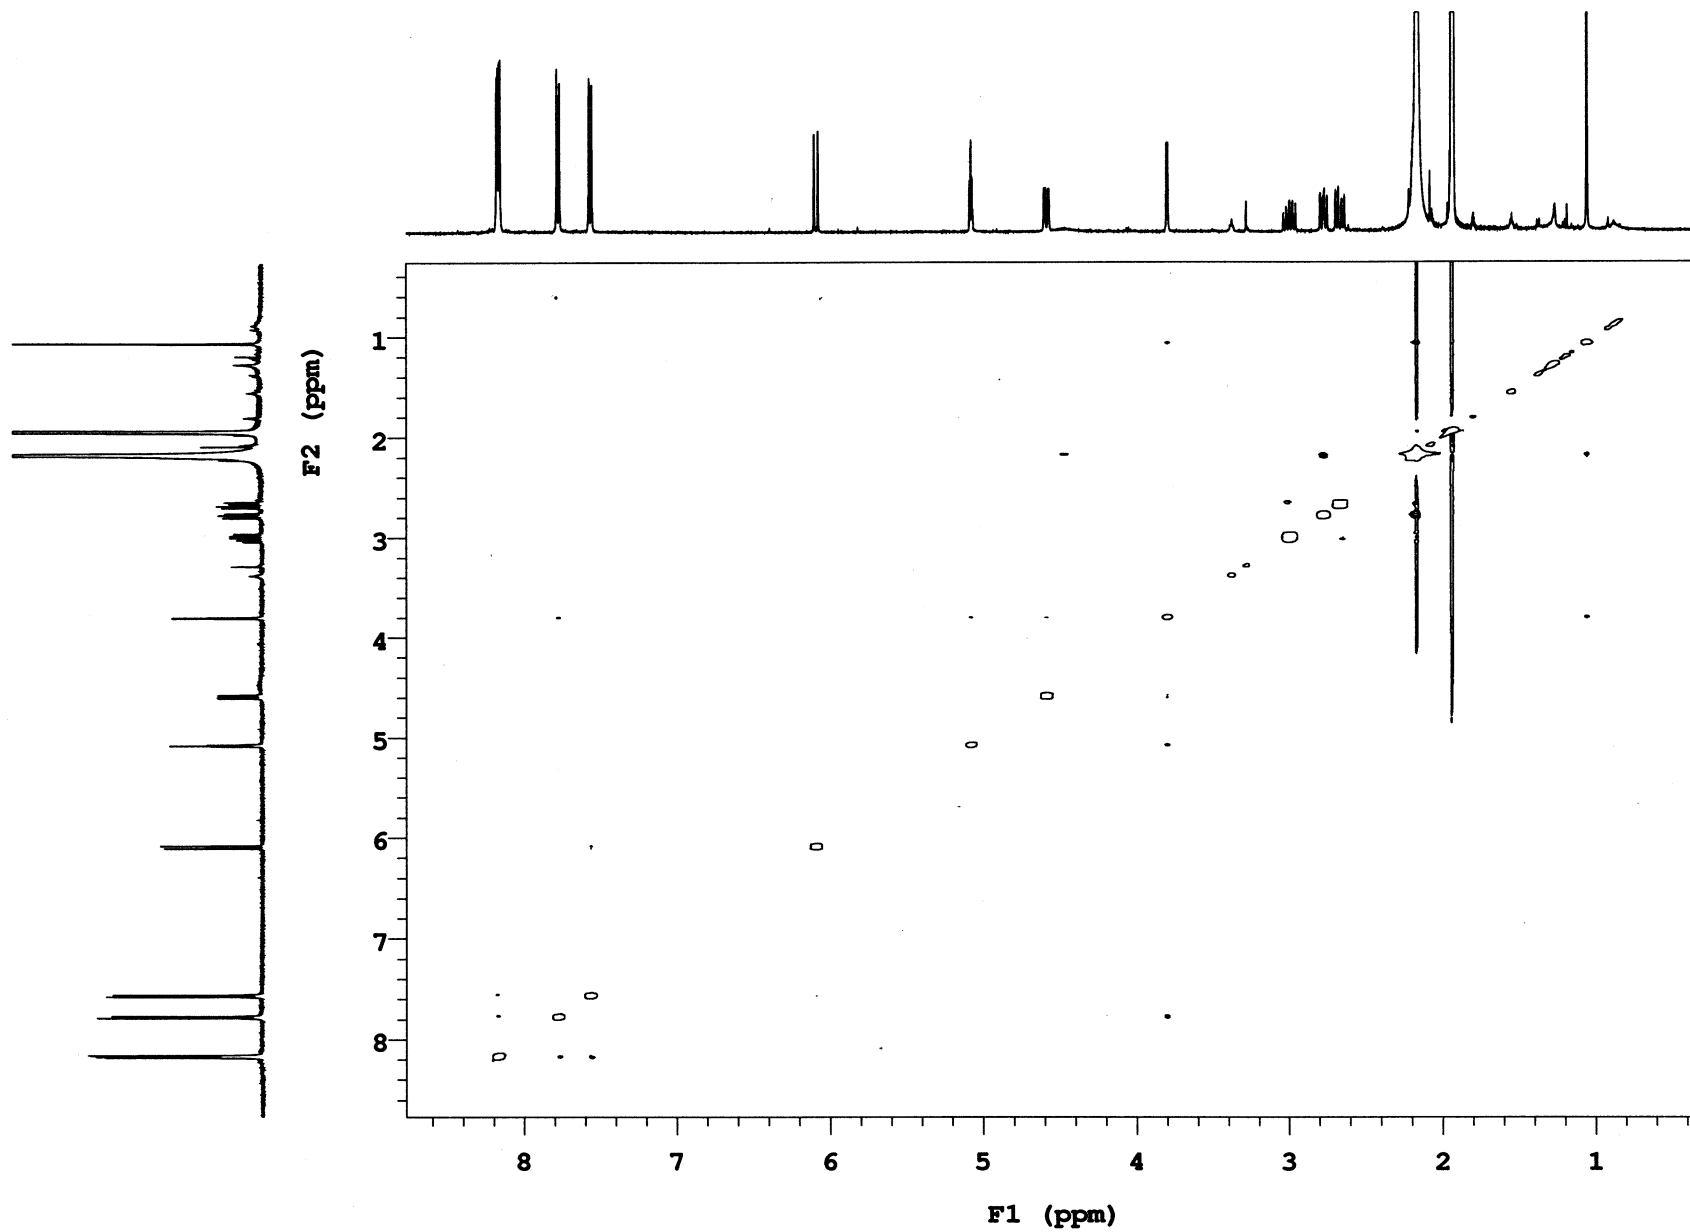

Fig S127. <sup>1</sup>H NMR (acetone-d<sub>6</sub>, 500 MHz) of compound 3i.

S127

CHP-8g-F2

Sample Name **CHP-8g-F2**  
Date collected **2016-05-12**

Pulse sequence **PROTON**  
Solvent **acetone**

Temperature **25**  
Spectrometer **Agilent-NMR-Inova500**

Study owner **vnmr2**  
Operator **vnmr2**

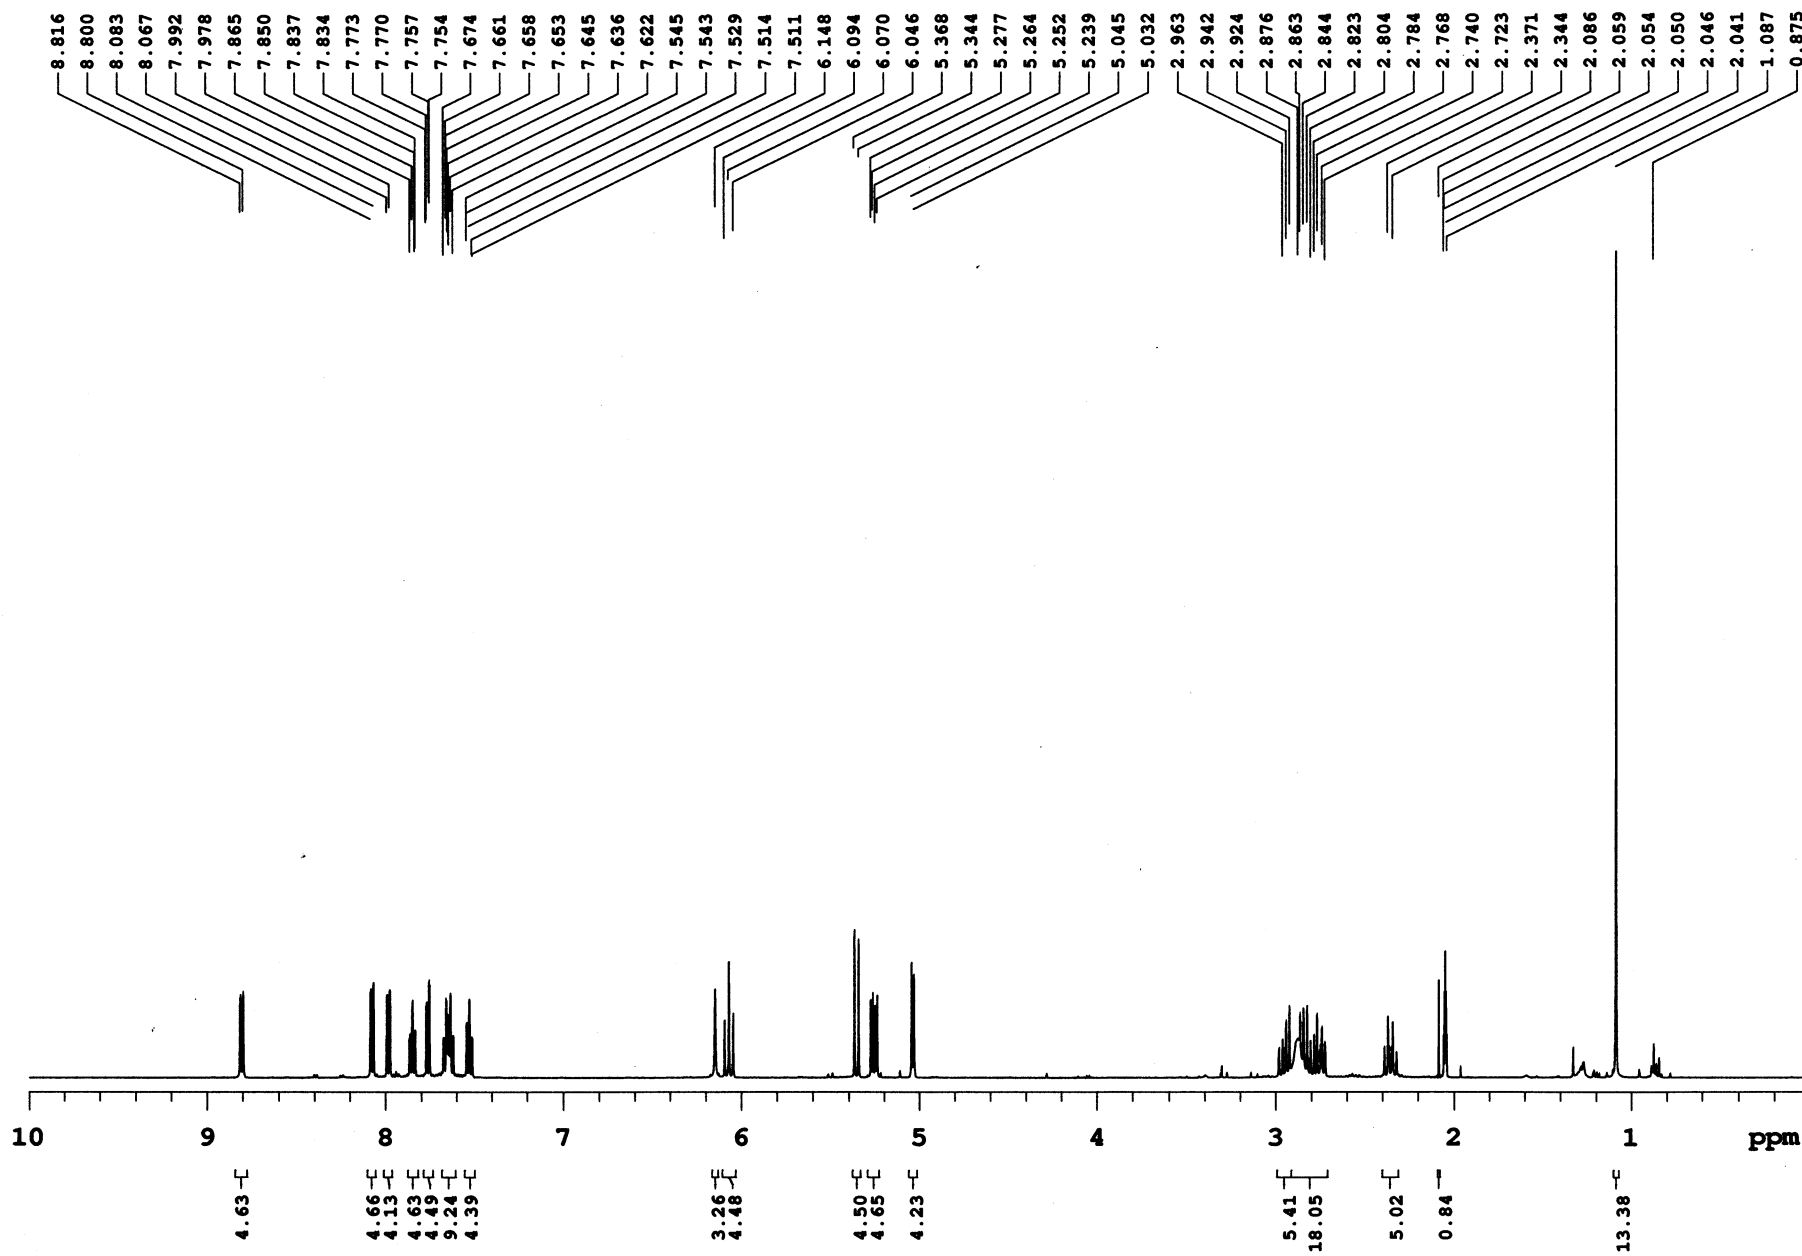

Fig S128. <sup>13</sup>C NMR (acetone-d<sub>6</sub>, 125 MHz) of compound 3i.

S128

CHP-8g-F2

Sample Name **CHP-8g-F2**  
Date collected **2016-05-09**

Pulse sequence **CARBON**  
Solvent **acetone**

Temperature **25**  
Spectrometer **Agilent-NMR-inova500**

Study owner **vnmr2**  
Operator **vnmr2**

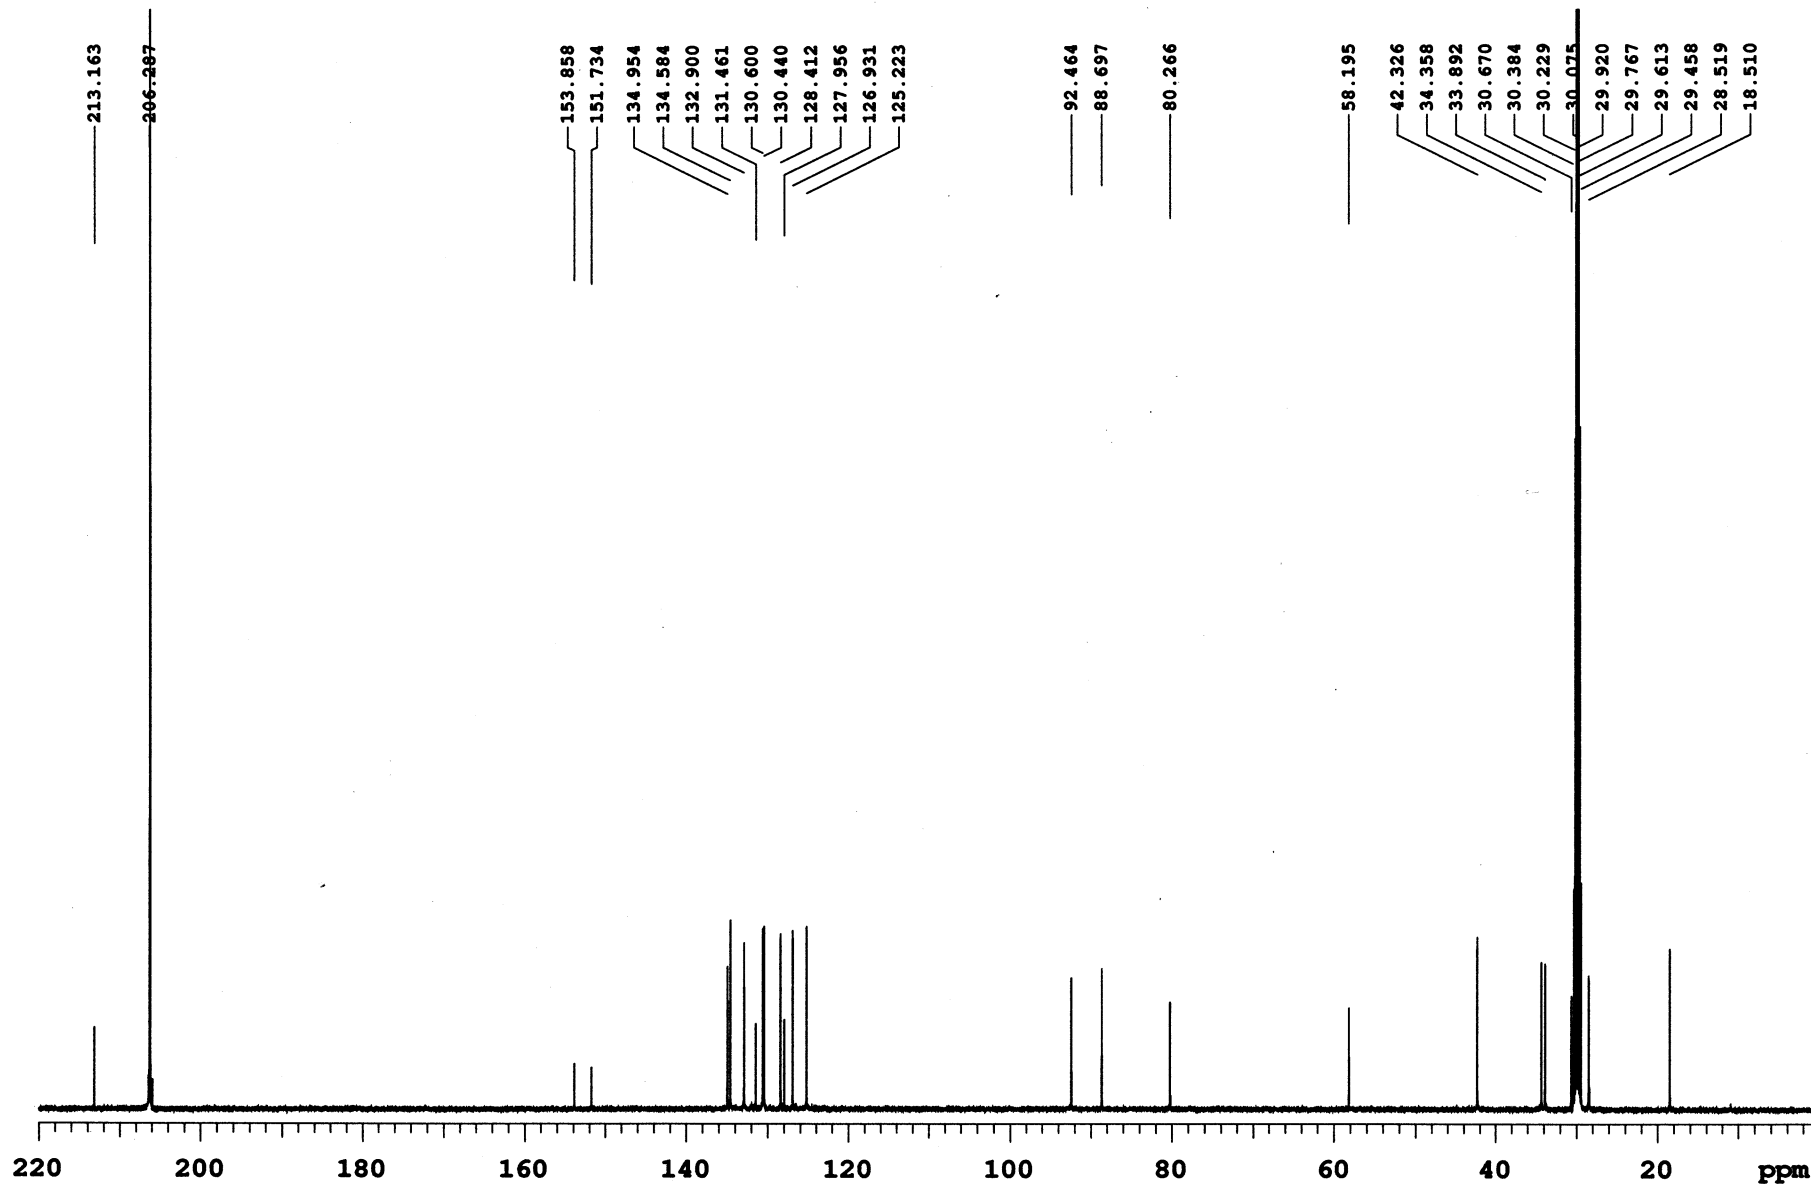

Fig S129. DEPT (acetone-d6) of compound 3i.

CHP-8g-F2

Sample Name **CHP-8g-F2**  
Date collected **2016-05-10**

Pulse sequence **DEPT**  
Solvent **acetone**

Temperature **25**  
Spectrometer **Agilent-NMR-inova500**

Study owner **vnmr2**  
Operator **vnmr2**

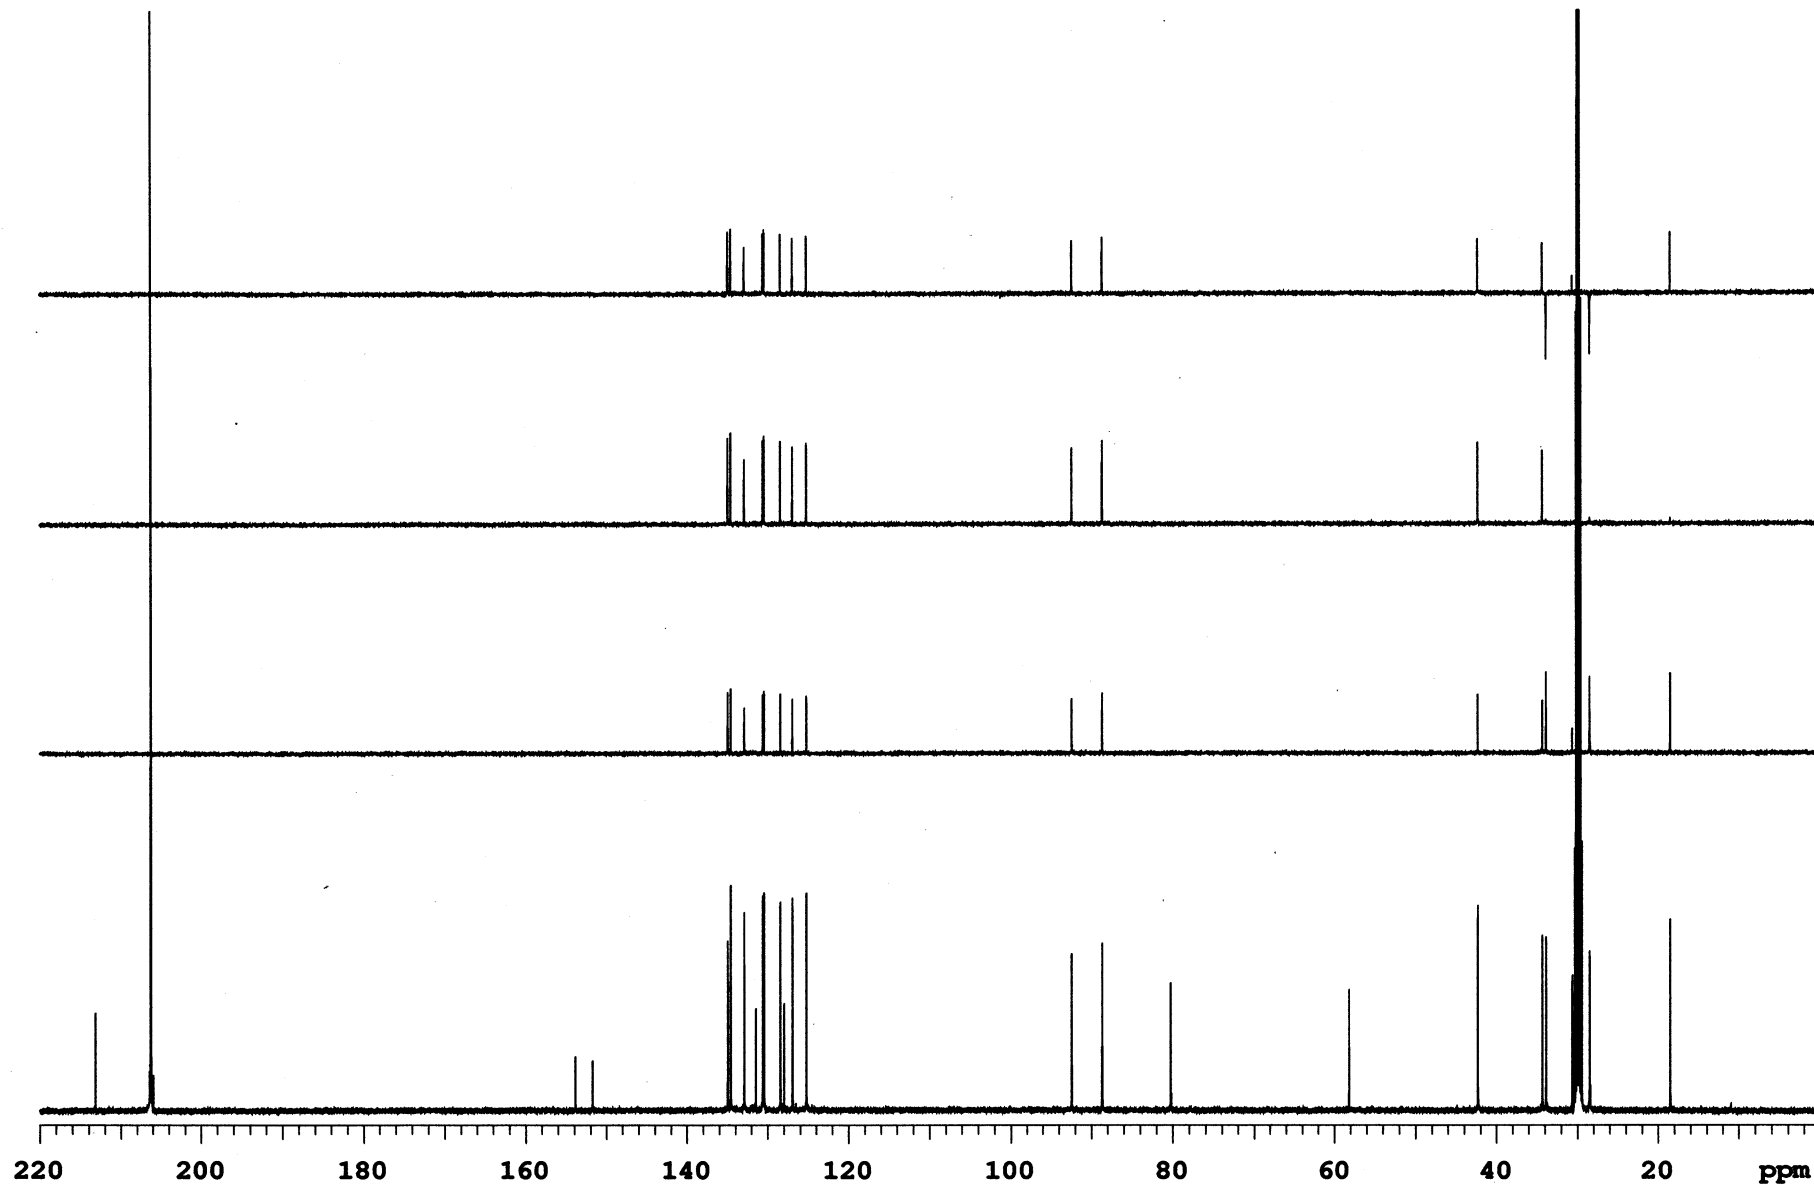

Fig S130. HSQC (acetone-d6) of compound 3i.

S130

CHP-8g-F2

Sample Name **CHP-8g-F2**  
Date collected **2016-05-10**

Pulse sequence **gHSQC**  
Solvent **acetone**

Temperature **25**  
Spectrometer **Agilent-NMR-inova500**

Study owner **vnmr2**  
Operator **vnmr2**

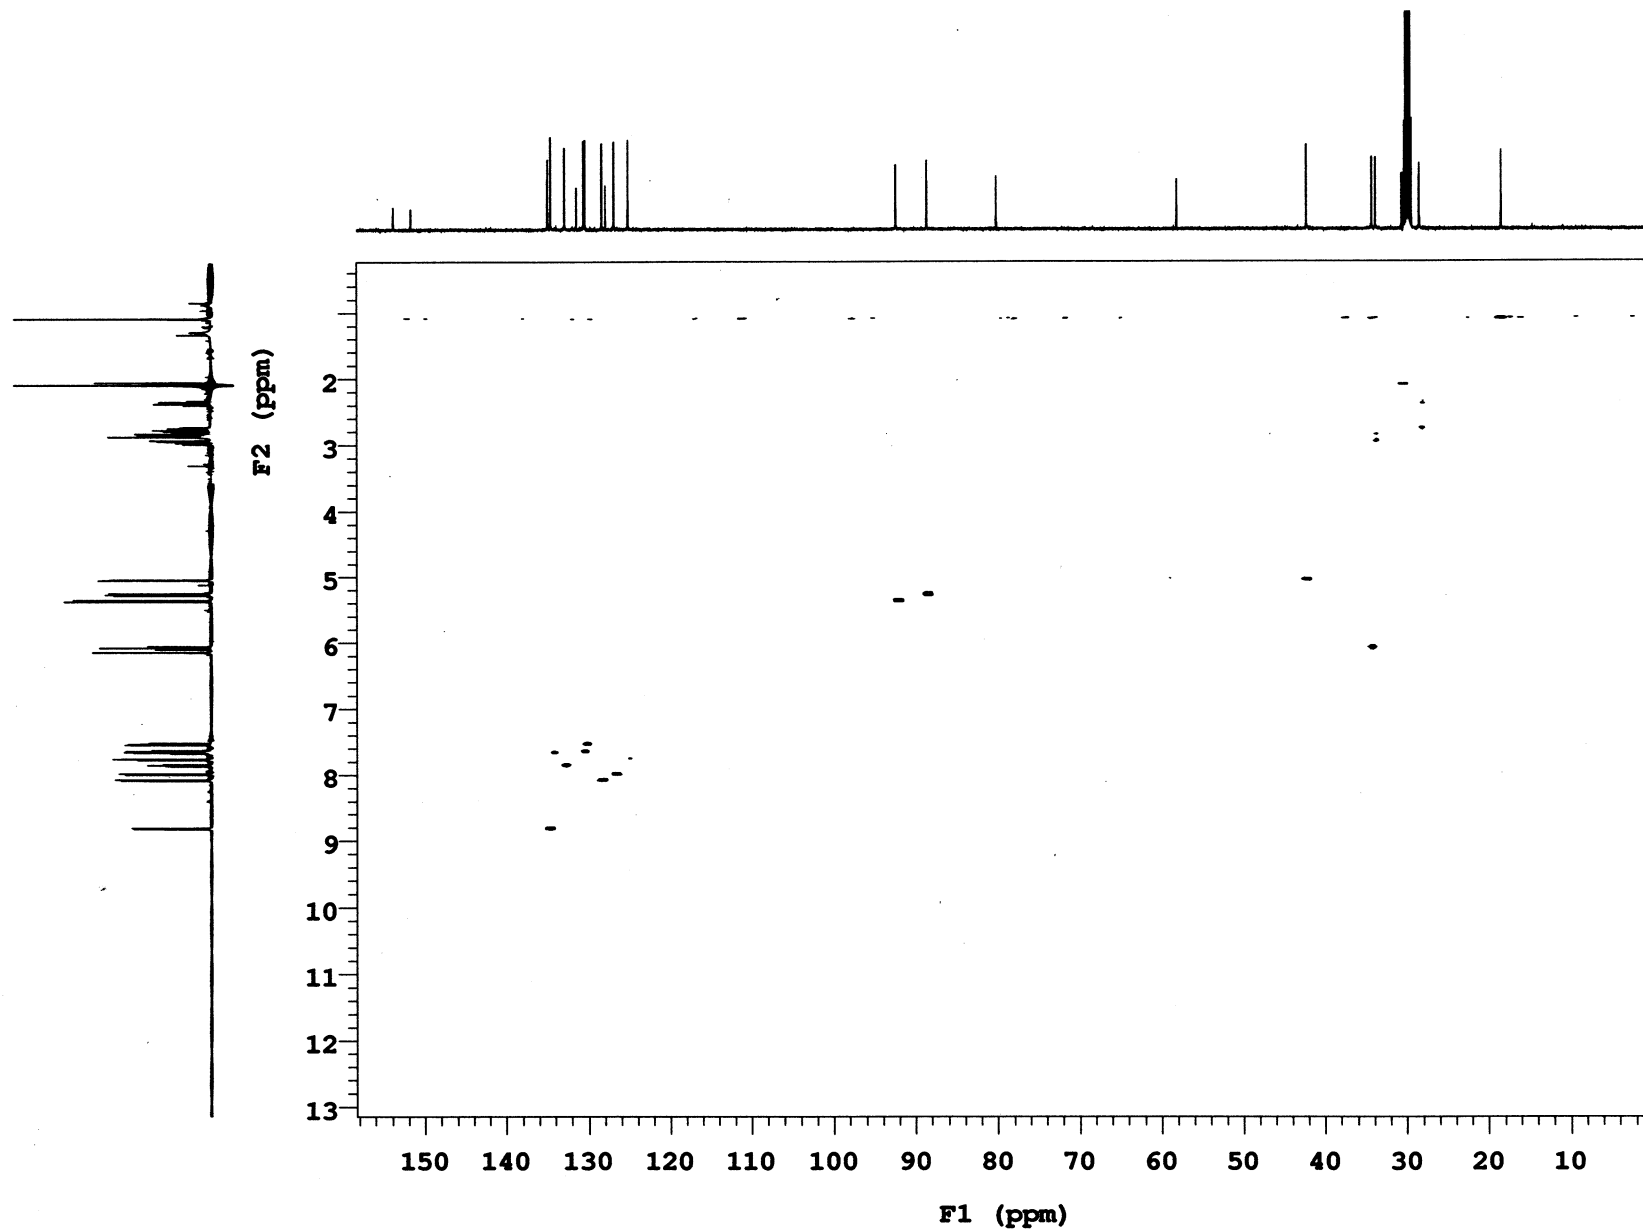

Fig S131. COSY (acetone-d6) of compound 3i.

CHP-8g-F2

Sample Name **CHP-8g-F2**  
Date collected **2016-05-10**

Pulse sequence **gCOSY**  
Solvent **acetone**

Temperature **25**  
Spectrometer **Agilent-NMR-inova500**

Study owner **vnmr2**  
Operator **vnmr2**

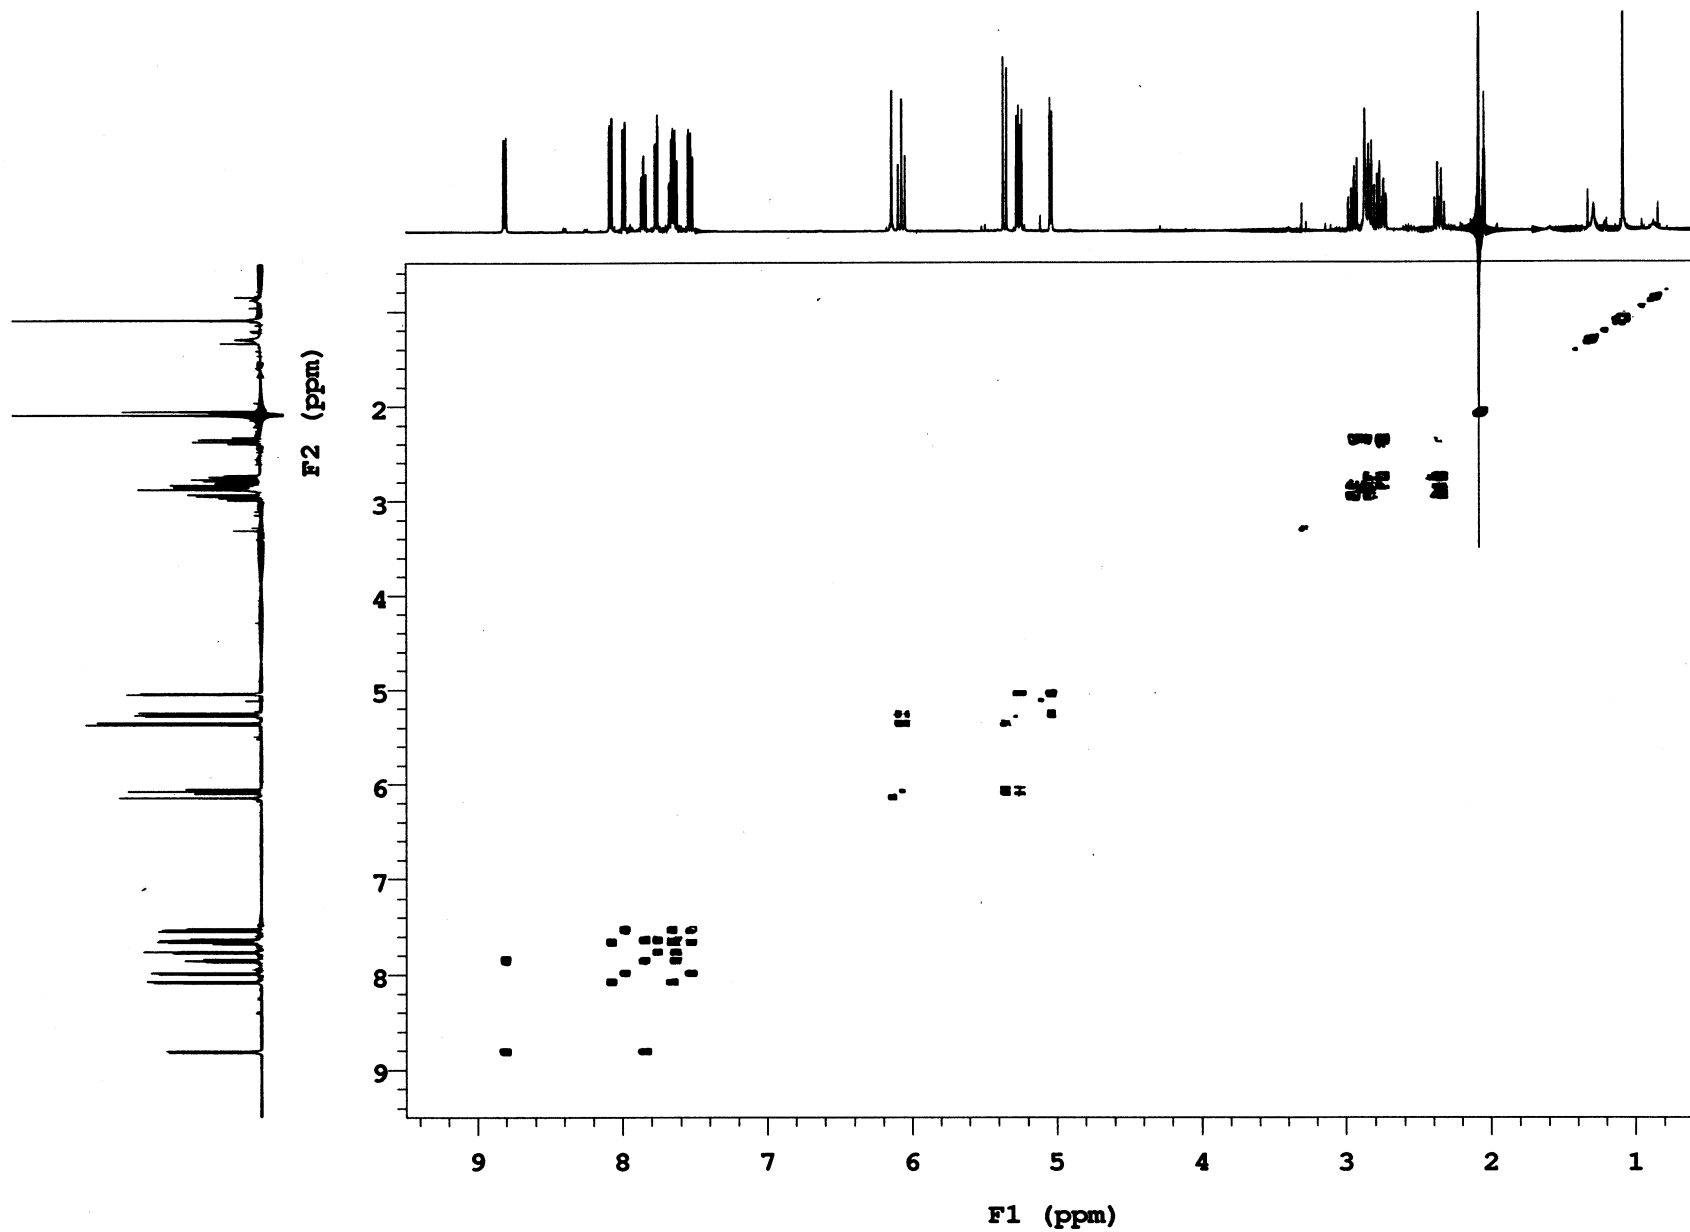

Fig S132. NOESY (acetone-d6) of compound 3i.

CHP-8g-F2

Sample Name **CHP-8g-F2**  
Date collected **2016-05-10**

Pulse sequence **NOESY**  
Solvent **acetone**

Temperature **25**  
Spectrometer **Agilent-NMR-inova500**

Study owner **vnmr2**  
Operator **vnmr2**

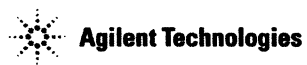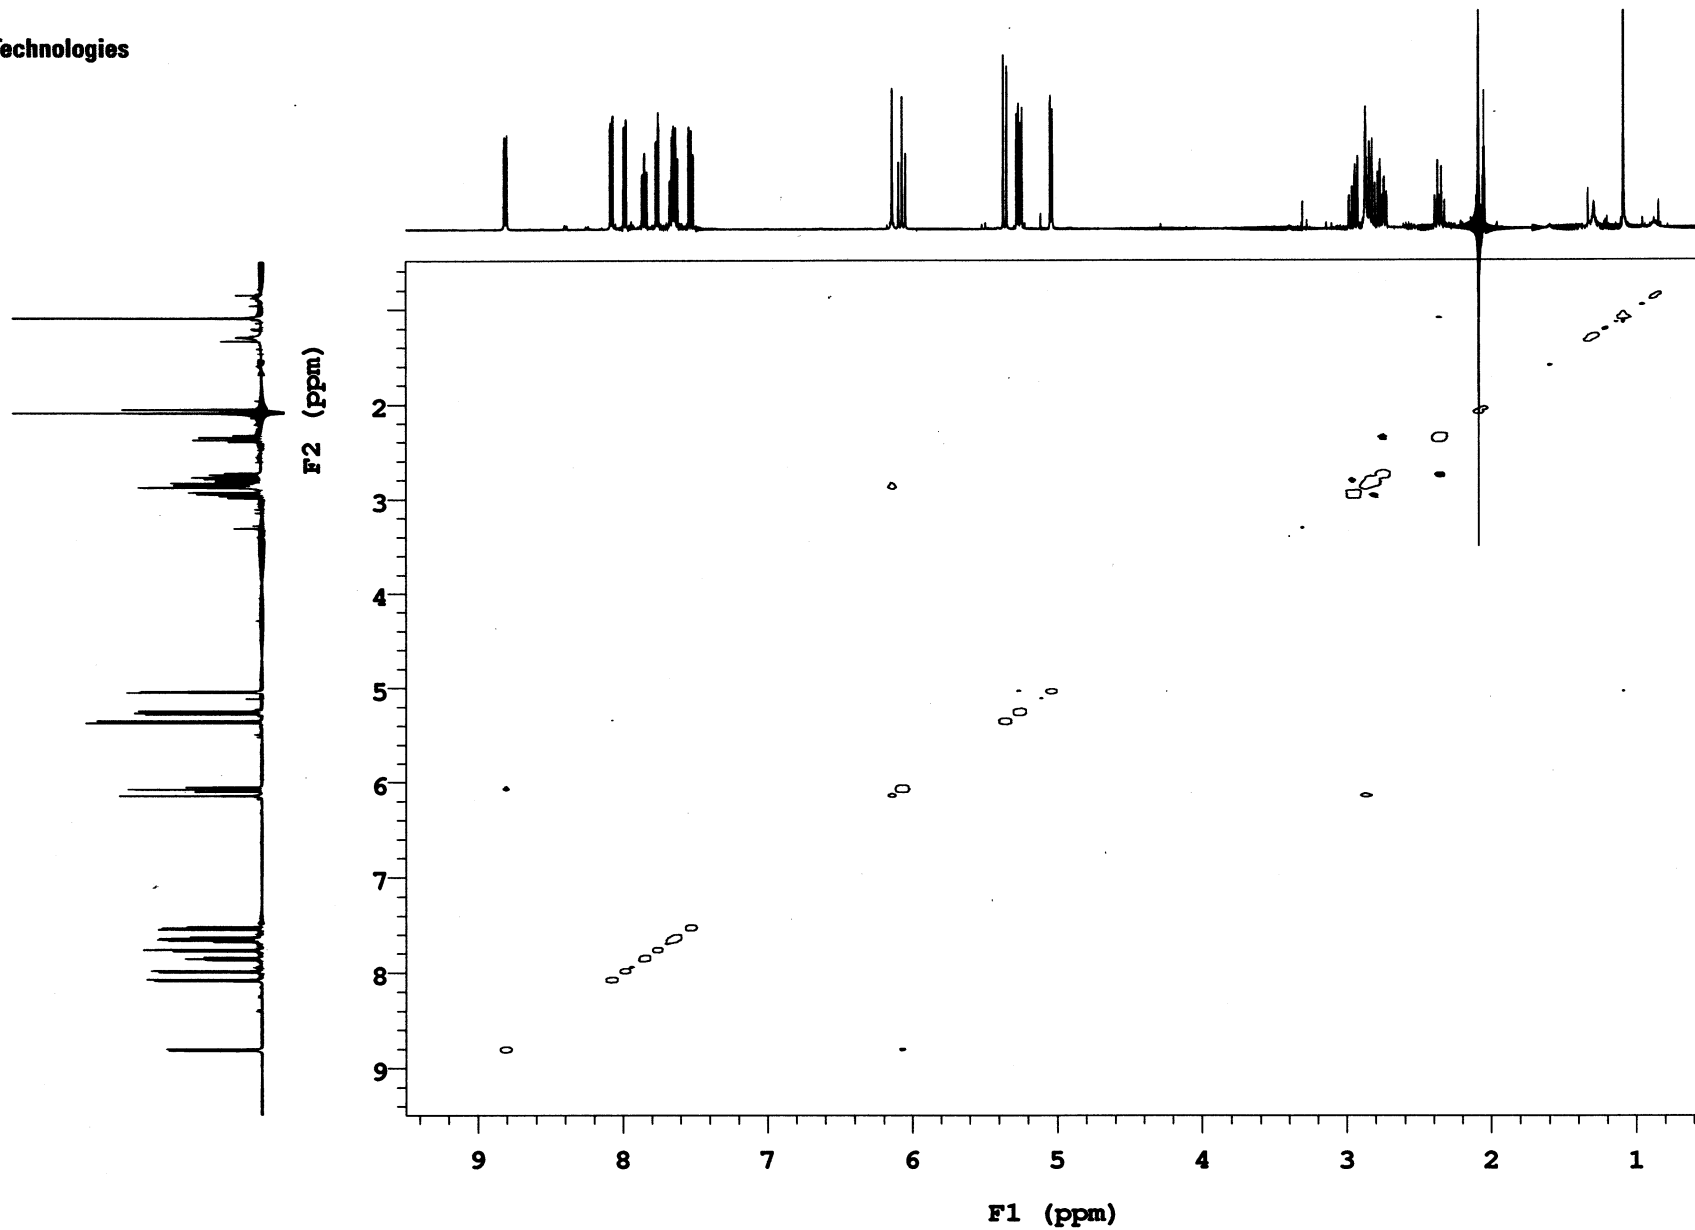



Fig S133. <sup>1</sup>H NMR (CD<sub>3</sub>CN, 500 MHz) of compound 3i.

CHP-01-075-F5

Sample Name **CHP-01-075-F5**  
Date collected **2016-05-02**

Pulse sequence **PROTON**  
Solvent **cd3cn**

Temperature **25**  
Spectrometer **Agilent-NMR-inova500**

Study owner **vnmr2**  
Operator **vnmr2**

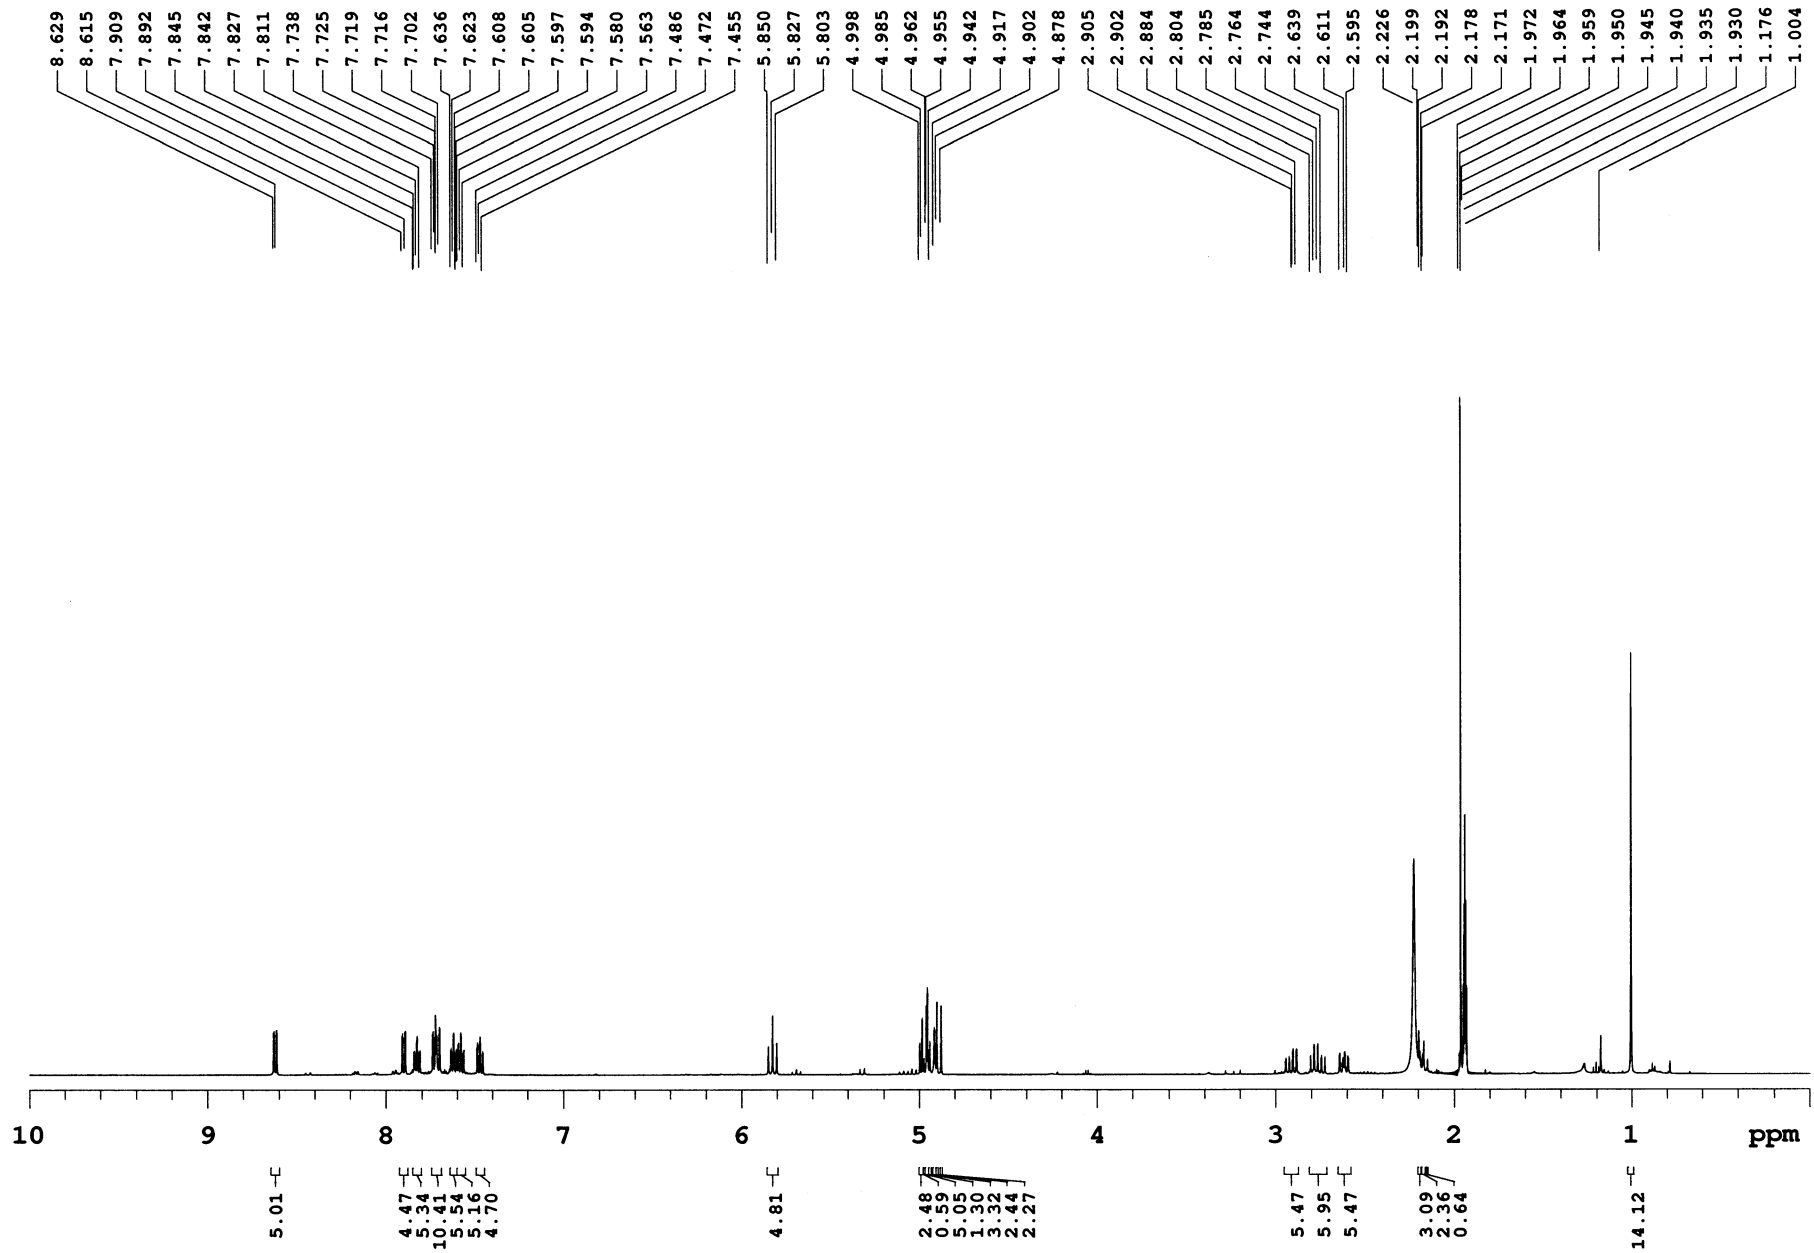

Fig S134. <sup>13</sup>C NMR (CD<sub>3</sub>CN, 125 MHz) of compound 3i.

S134

CHP-01-075-F5

Sample Name **CHP-01-075-F5**  
Date collected **2016-05-02**

Pulse sequence **CARBON**  
Solvent **cd3cn**

Temperature **25**  
Spectrometer **Agilent-NMR-inova500**

Study owner **vnmr2**  
Operator **vnmr2**

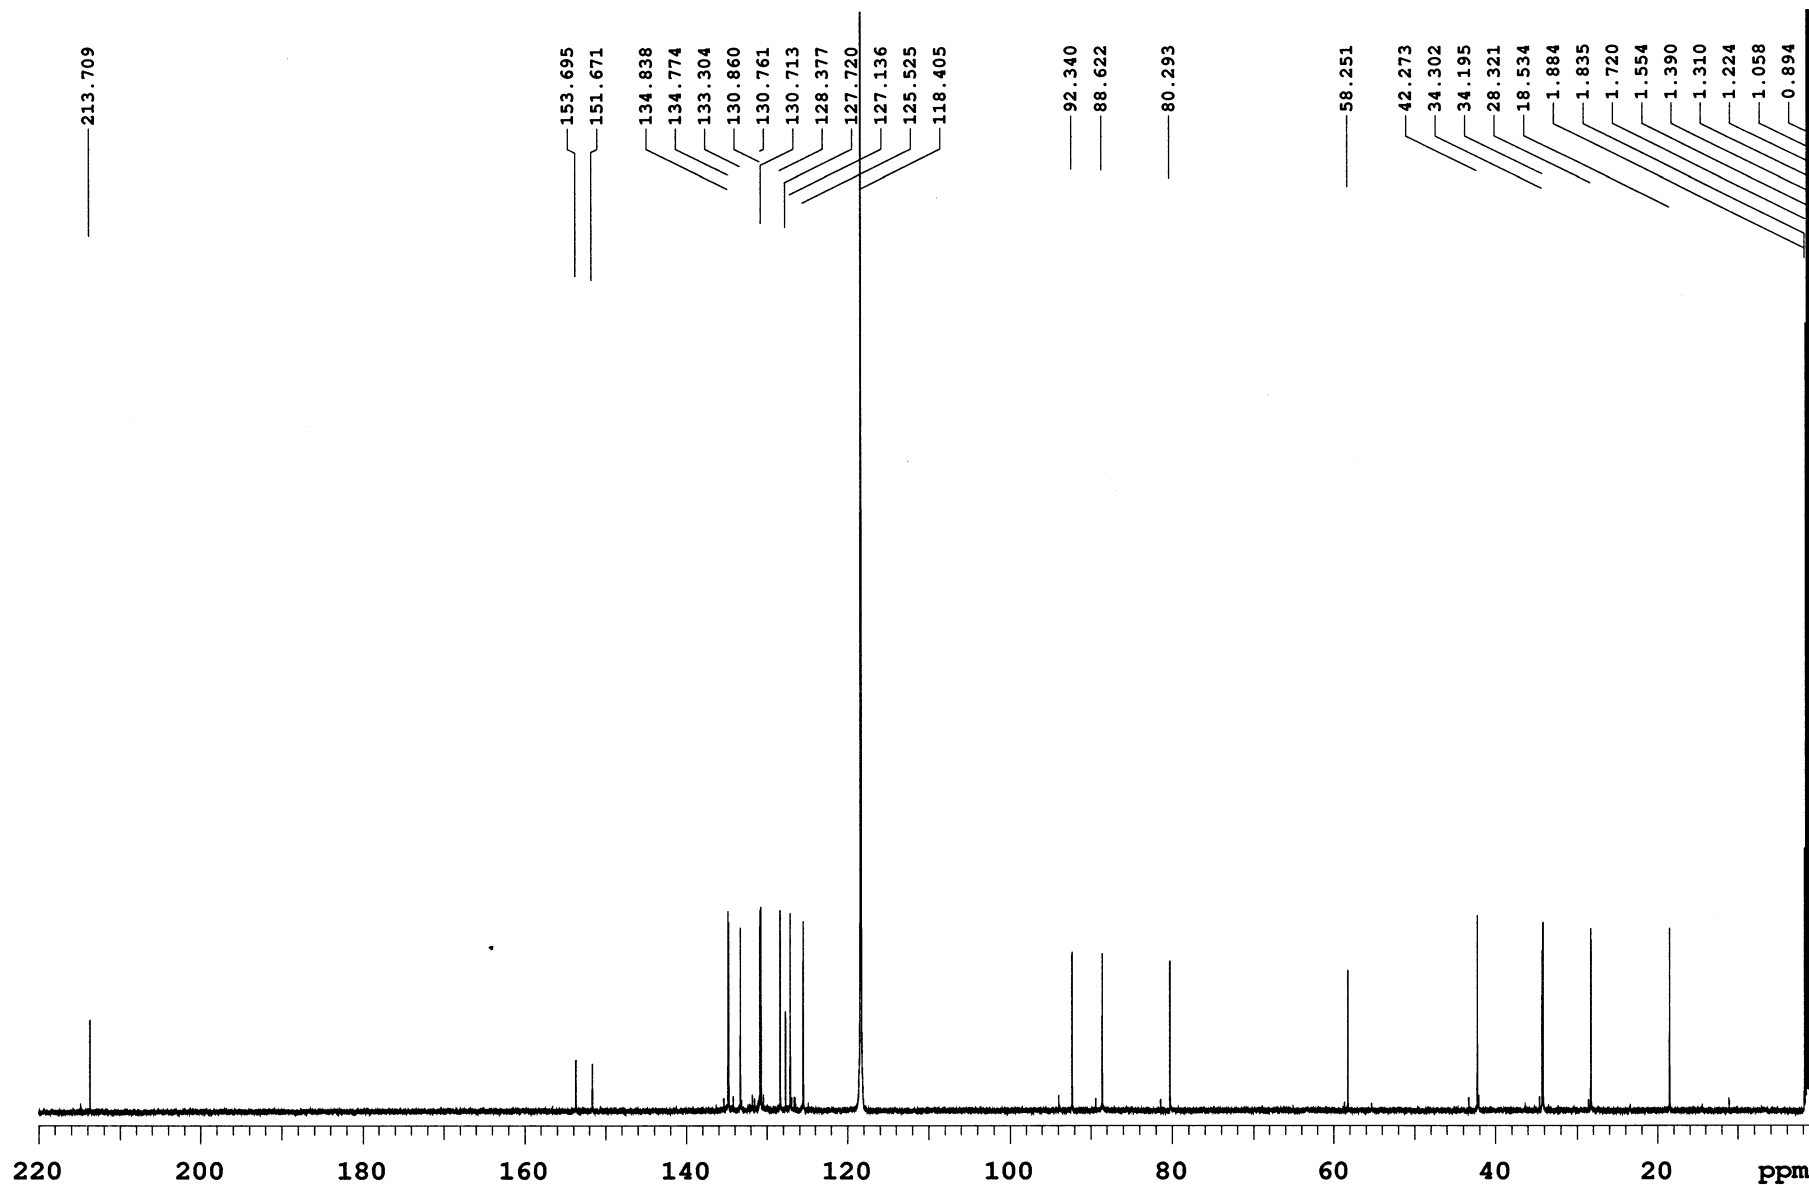

Fig S135. DEPT (CD3CN) of compound 3i.

S135

CHP-01-075-F5

Sample Name **CHP-01-075-F5**  
Date collected **2016-05-03**

Pulse sequence **DEPT**  
Solvent **cd3cn**

Temperature **25**  
Spectrometer **Agilent-NMR-inova500**

Study owner **vnmr2**  
Operator **vnmr2**

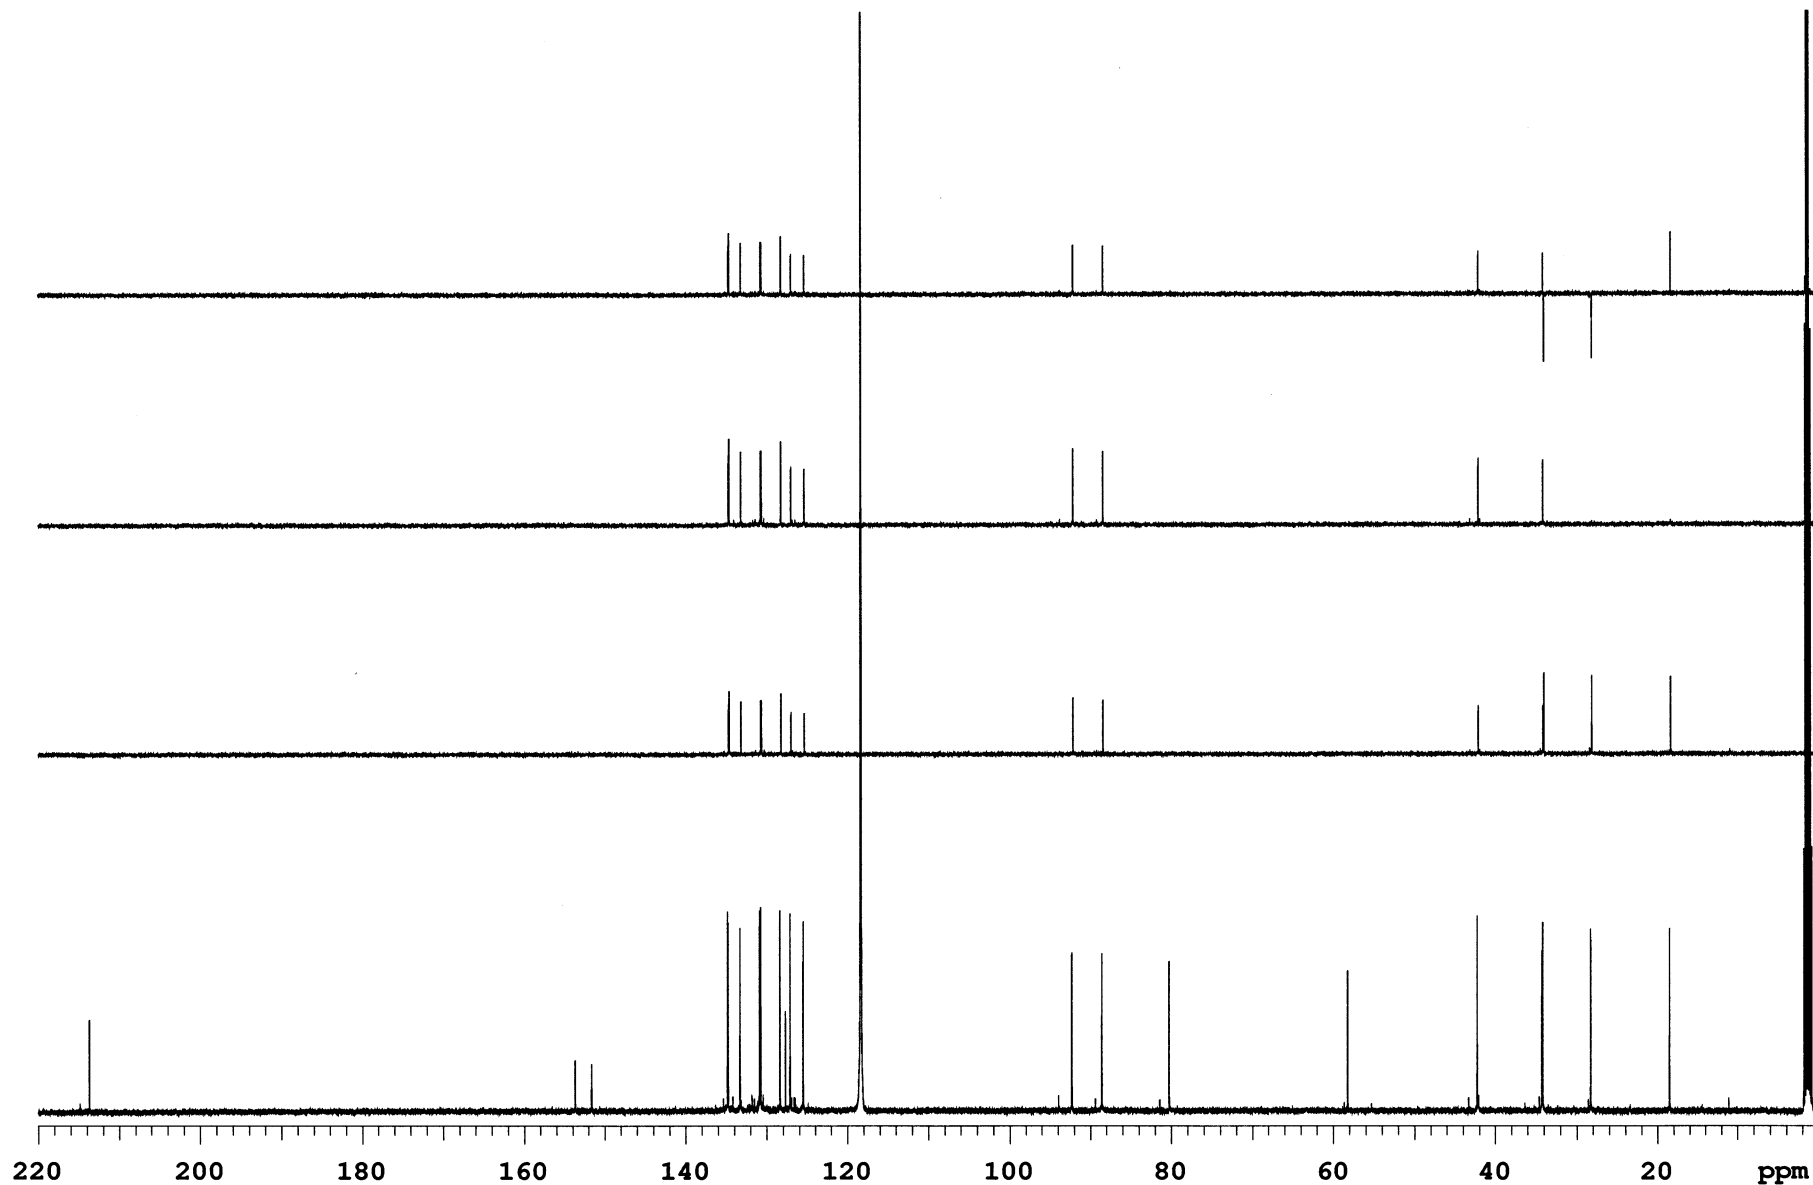

Fig S136. HSQC (CD3CN) of compound 3i.

S136

CHP-01-075-F5

Sample Name **CHP-01-075-F5**  
Date collected **2016-05-03**

Pulse sequence **gHSQC**  
Solvent **cd3cn**

Temperature **25**  
Spectrometer **Agilent-NMR-inova500**

Study owner **vnmr2**  
Operator **vnmr2**

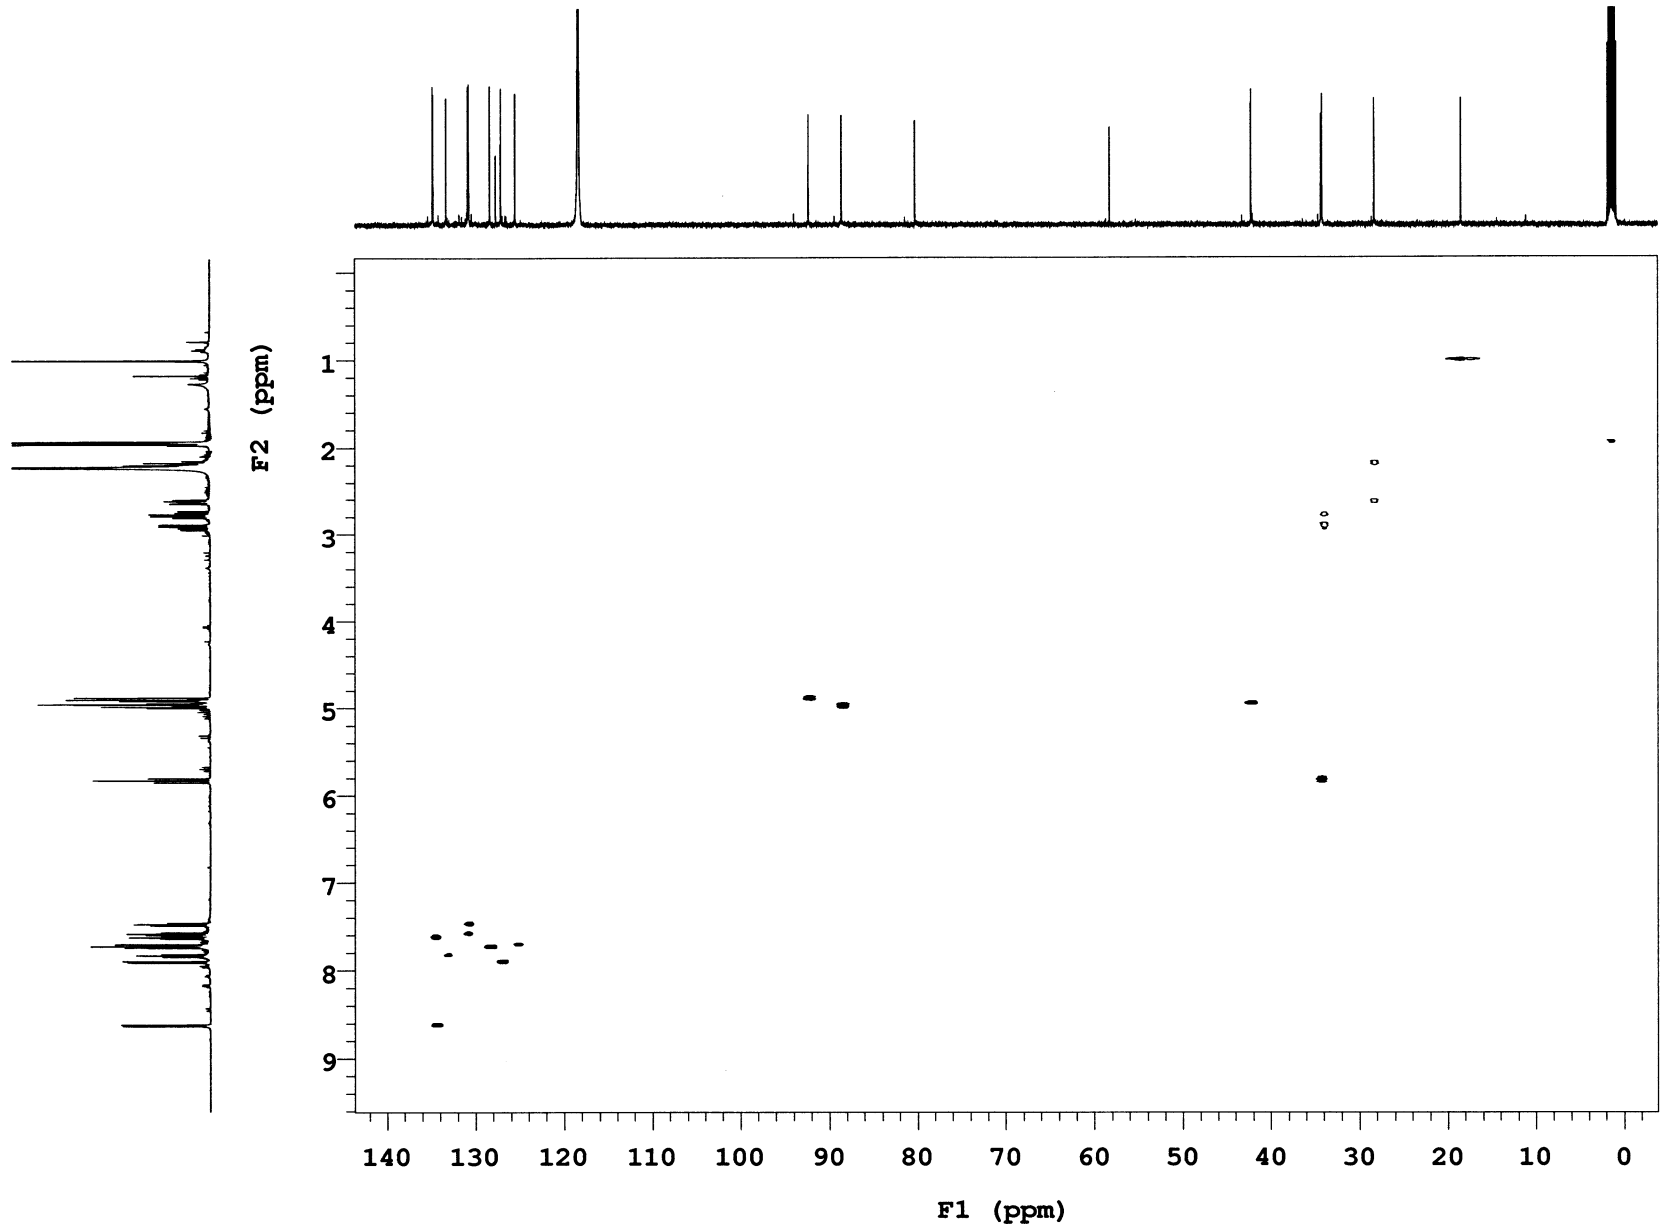

CHP-01-075-F5

Sample Name **CHP-01-075-F5**  
Date collected **2016-05-03**Pulse sequence **gHSQC**  
Solvent **cd3cn**Temperature **25**  
Spectrometer **Agilent-NMR-inova500**Study owner **vnmr2**  
Operator **vnmr2**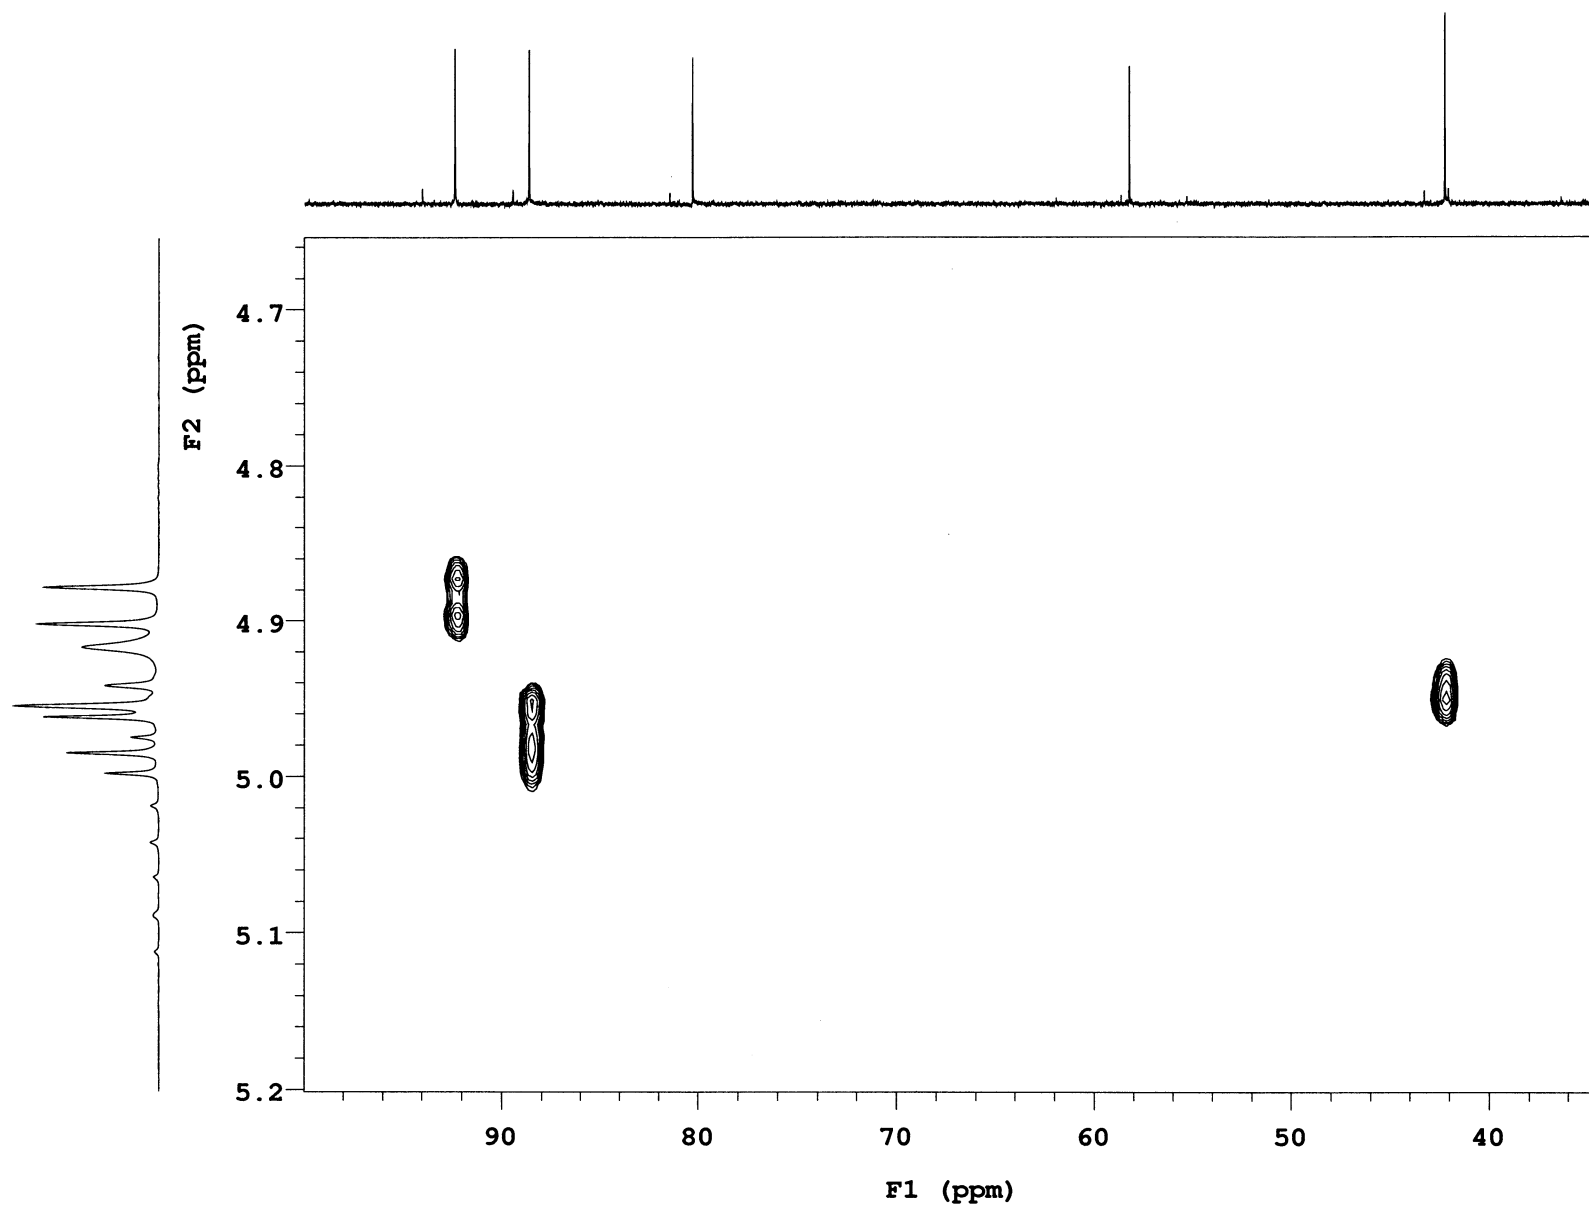

Fig S138. COSY (CD3CN) of compound 3i.

CHP-01-075-F5

Sample Name **CHP-01-075-F5**  
Date collected **2016-05-03**

Pulse sequence **gCOSY**  
Solvent **cd3cn**

Temperature **25**  
Spectrometer **Agilent-NMR-inova500**

Study owner **vnmr2**  
Operator **vnmr2**

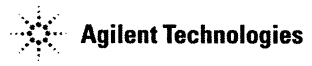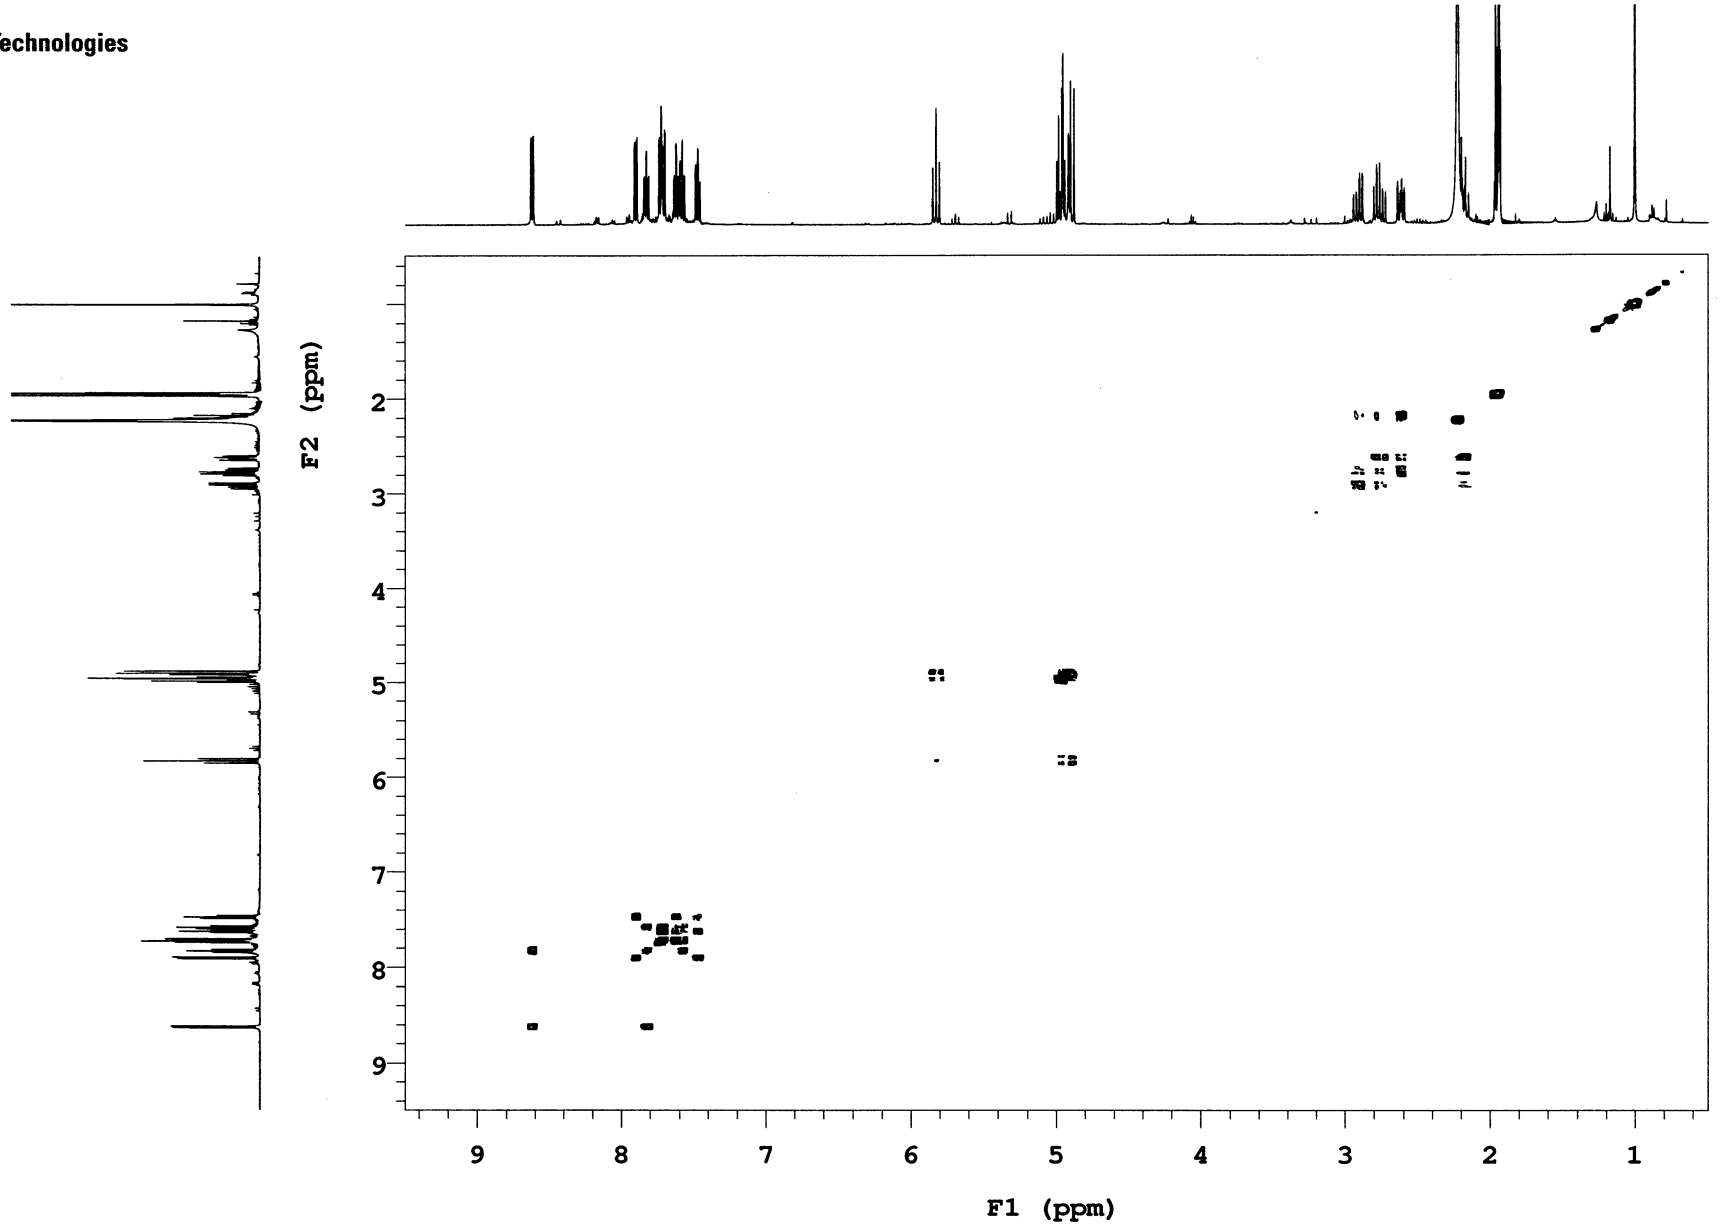

CHP-01-075-F5

Sample Name **CHP-01-075-F5**  
Date collected **2016-05-03**Pulse sequence **NOESY**  
Solvent **cd3cn**Temperature **25**  
Spectrometer **Agilent-NMR-inova500**Study owner **vnmr2**  
Operator **vnmr2**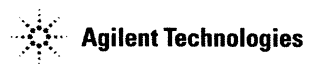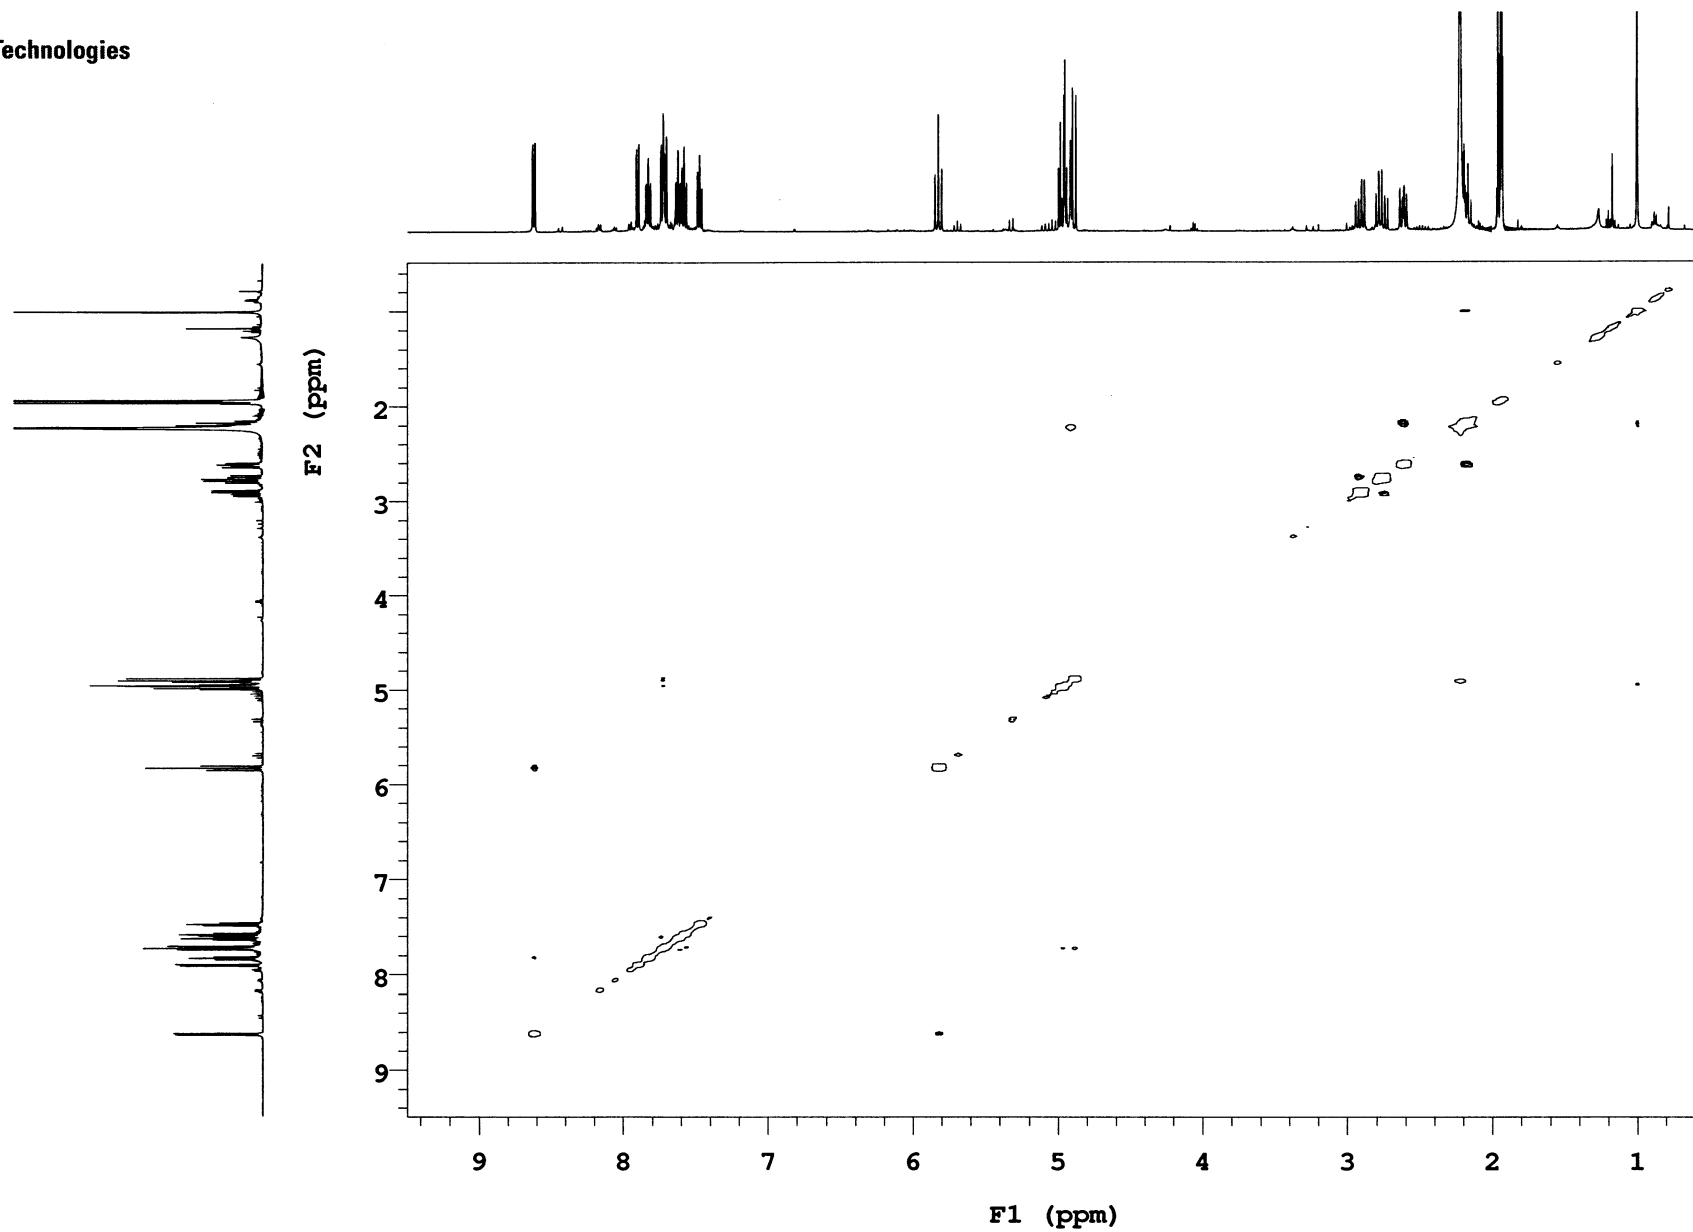

Fig S140. <sup>1</sup>H NMR (CD<sub>3</sub>CN, 500 MHz) of compound 5i.

S140

CHP-8g

Sample Name **CHP-8g**  
Date collected **2016-04-12**

Pulse sequence **PROTON**  
Solvent **cd3cn**

Temperature **25**  
Spectrometer **Agilent-NMR-Inova500**

Study owner **vnmr2**  
Operator **vnmr2**

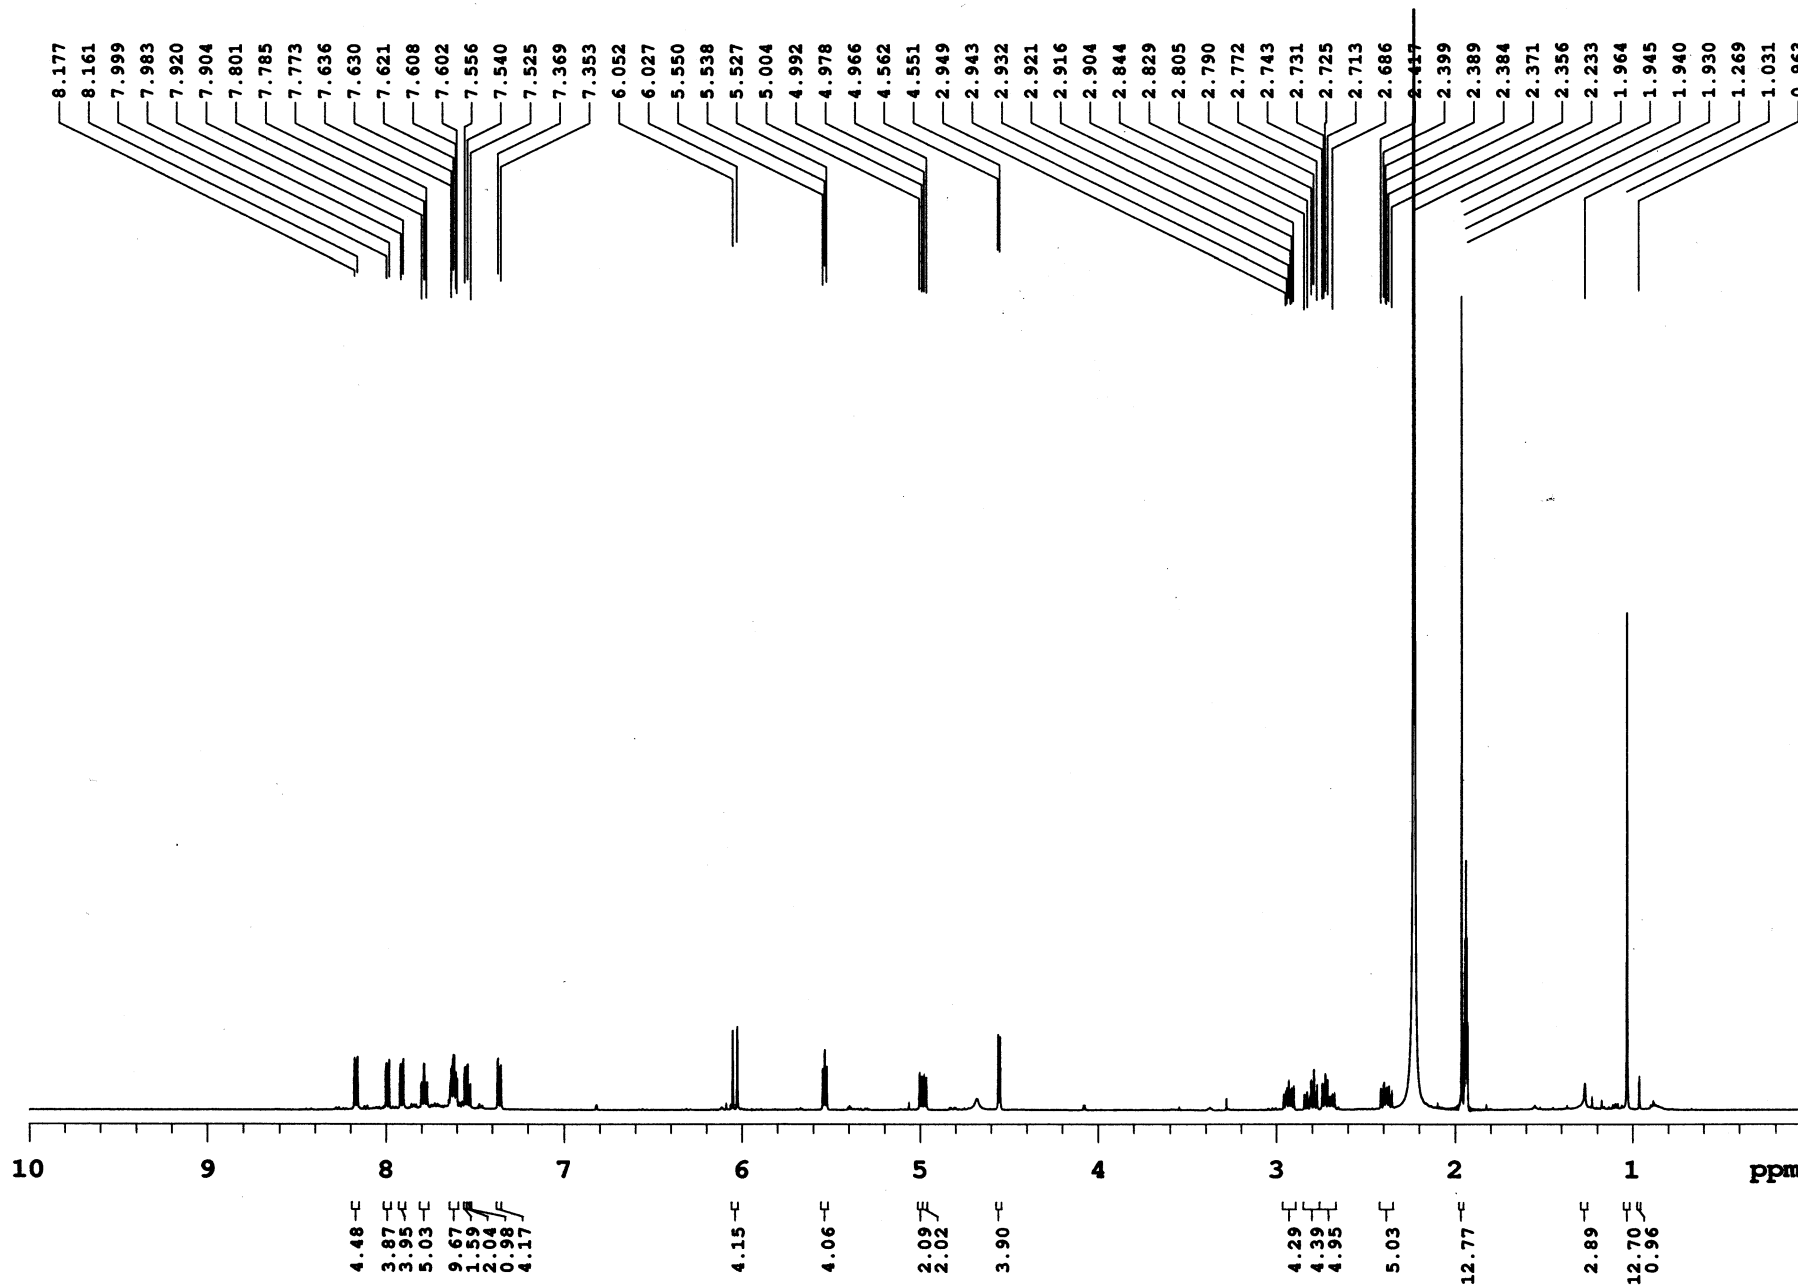



Fig S141. <sup>13</sup>C NMR (CD<sub>3</sub>CN, 125 MHz) of compound 5i.

S141

CHP-8g

Sample Name **CHP-8g**  
Date collected **2016-04-12**

Pulse sequence **CARBON**  
Solvent **cd3cn**

Temperature **25**  
Spectrometer **Agilent-NMR-inova500**

Study owner **vnmr2**  
Operator **vnmr2**

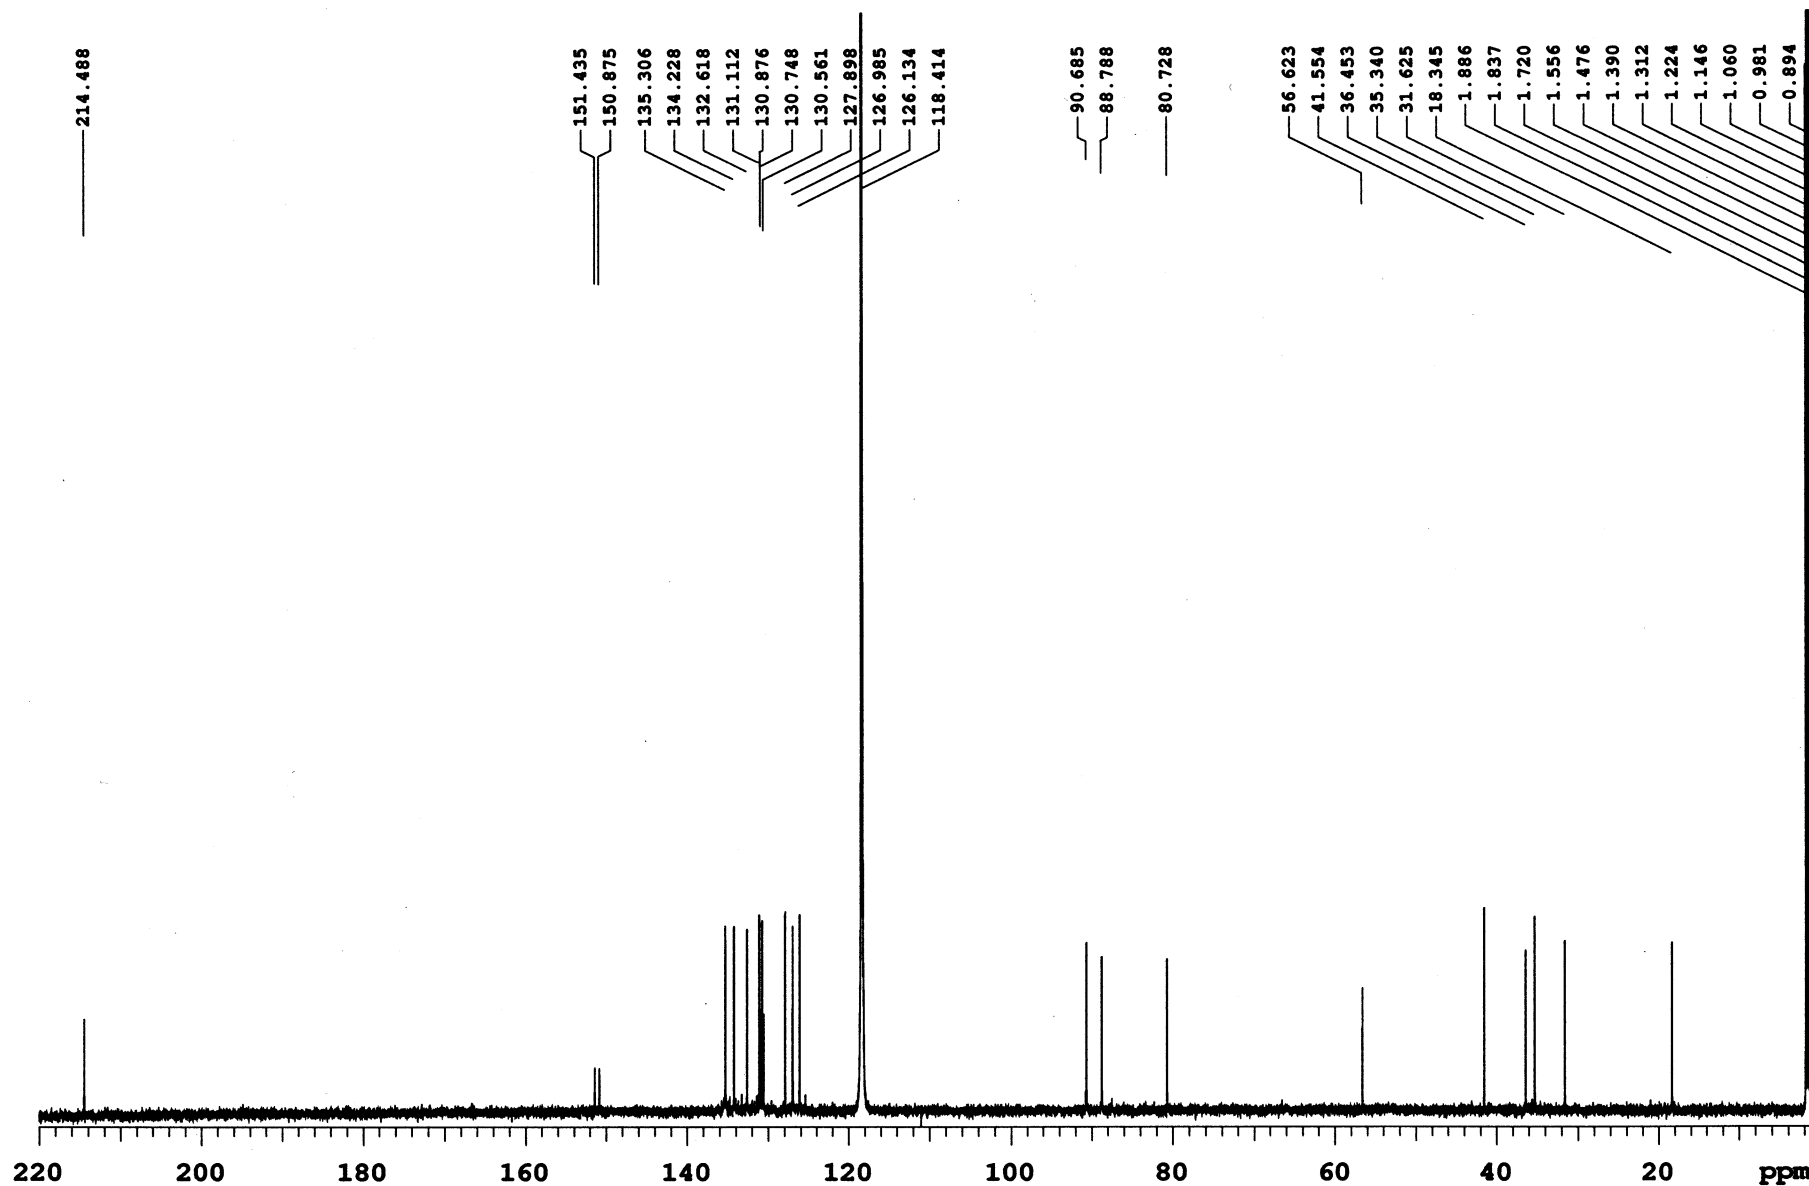

Fig S142. DEPT of compound 5i.

CHP-8g

Sample Name **CHP-8g**  
Date collected **2016-04-13**

Pulse sequence **DEPT**  
Solvent **cd3cn**

Temperature **25**  
Spectrometer **Agilent-NMR-inova500**

Study owner **vnmr2**  
Operator **vnmr2**

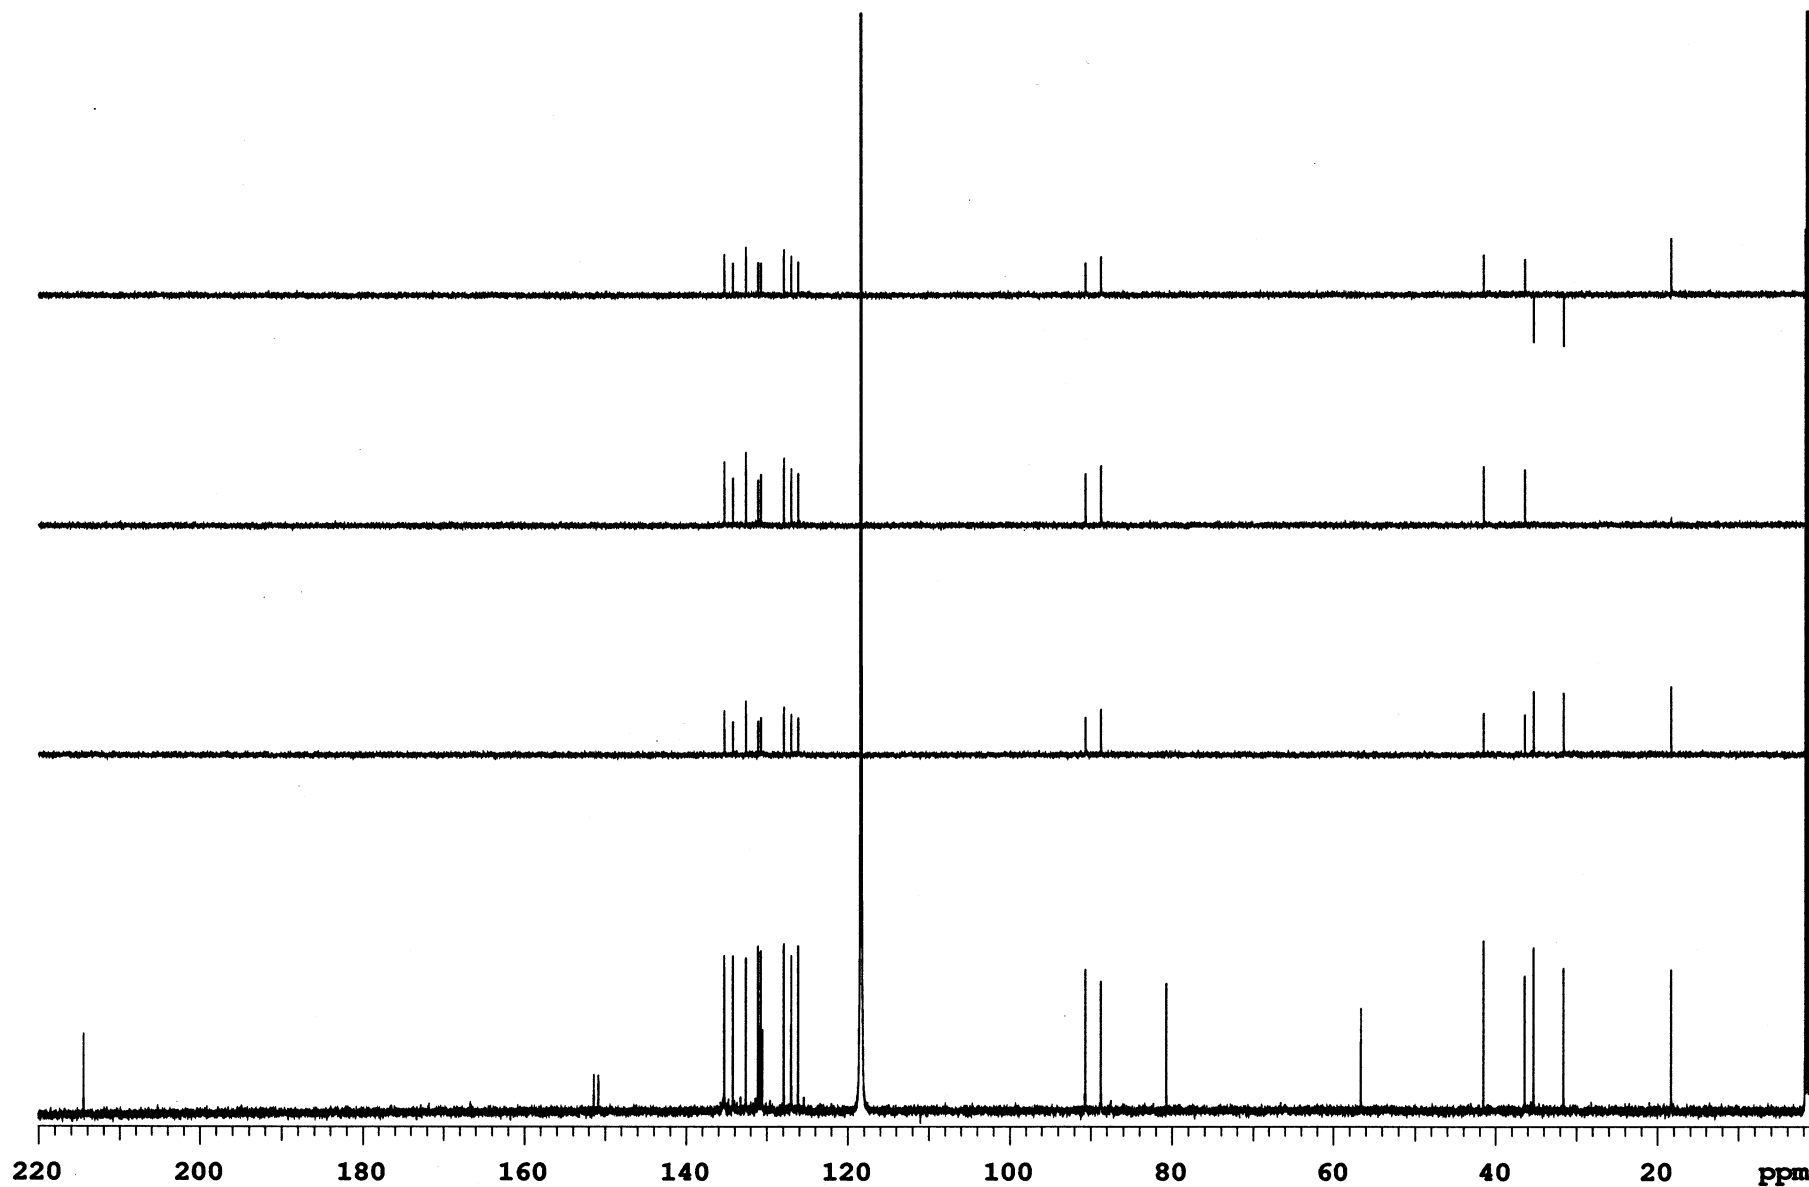

Fig S143. HSQC of compound 5i.

S143

CHP-8g

Sample Name **CHP-8g**  
Date collected **2016-04-13**

Pulse sequence **gHSQC**  
Solvent **cd3cn**

Temperature **25**  
Spectrometer **Agilent-NMR-inova500**

Study owner **vnmr2**  
Operator **vnmr2**

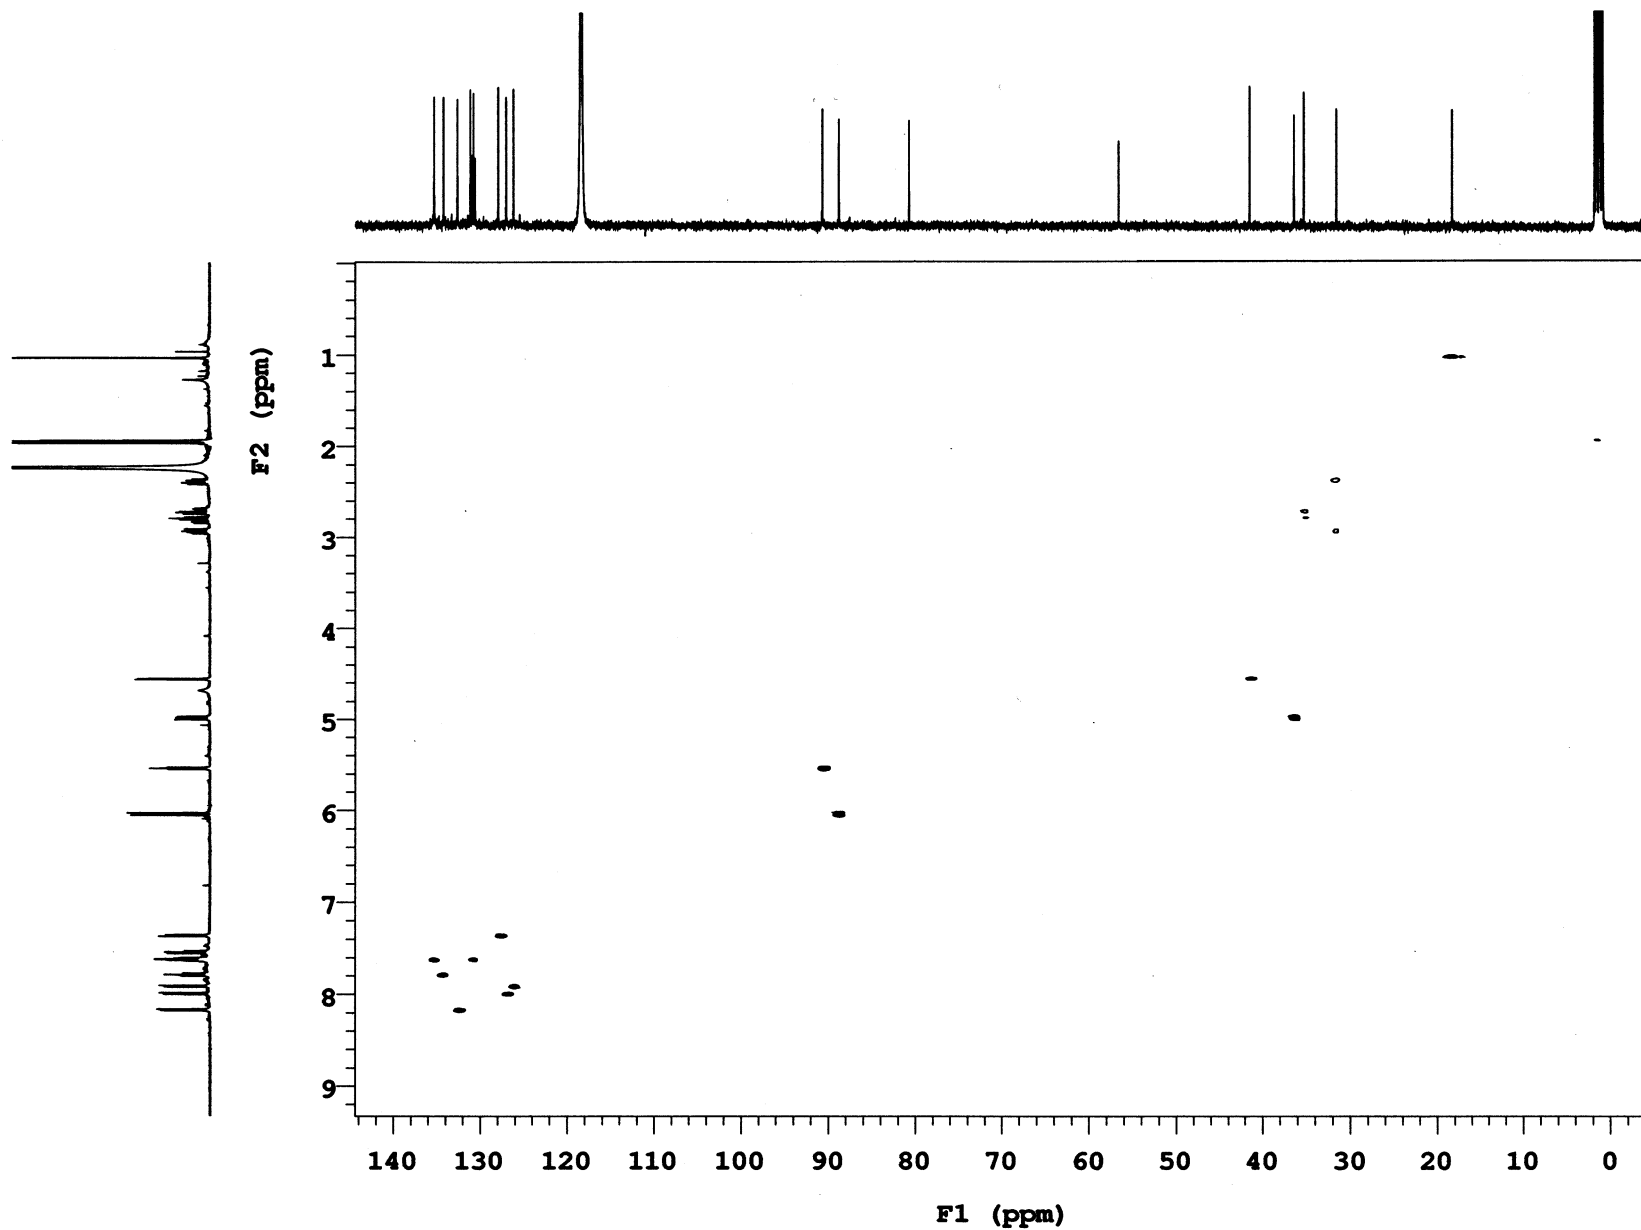

Fig S144. COSY of compound 5i.

S144

CHP-8g

Sample Name **CHP-8g**  
Date collected **2016-04-13**

Pulse sequence **gCOSY**  
Solvent **cd3cn**

Temperature **25**  
Spectrometer **Agilent-NMR-inova500**

Study owner **vnmr2**  
Operator **vnmr2**

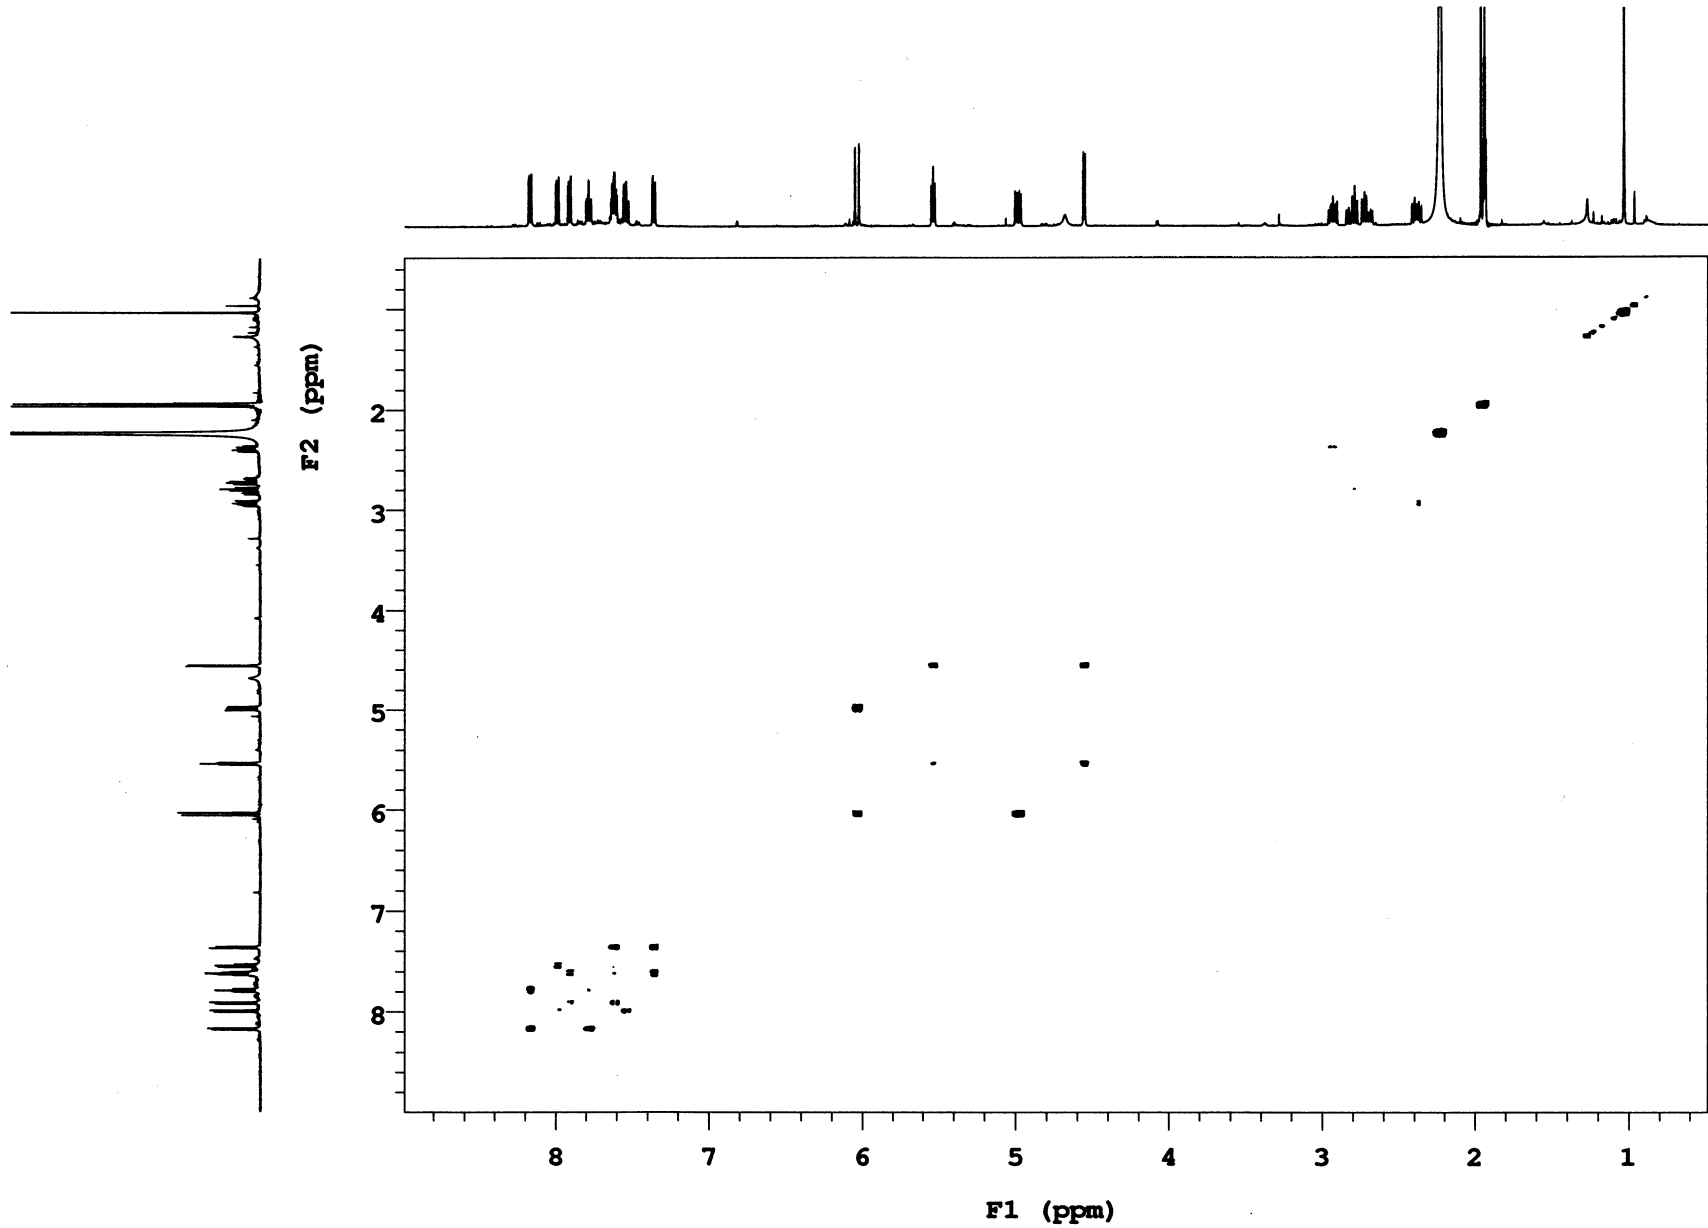

Fig S145. NOESY of compound 5i.

CHP-8g

Sample Name **CHP-8g**  
Date collected **2016-04-13**

Pulse sequence **NOESY**  
Solvent **cd3cn**

Temperature **25**  
Spectrometer **Agilent-NMR-inova500**

Study owner **vnmr2**  
Operator **vnmr2**

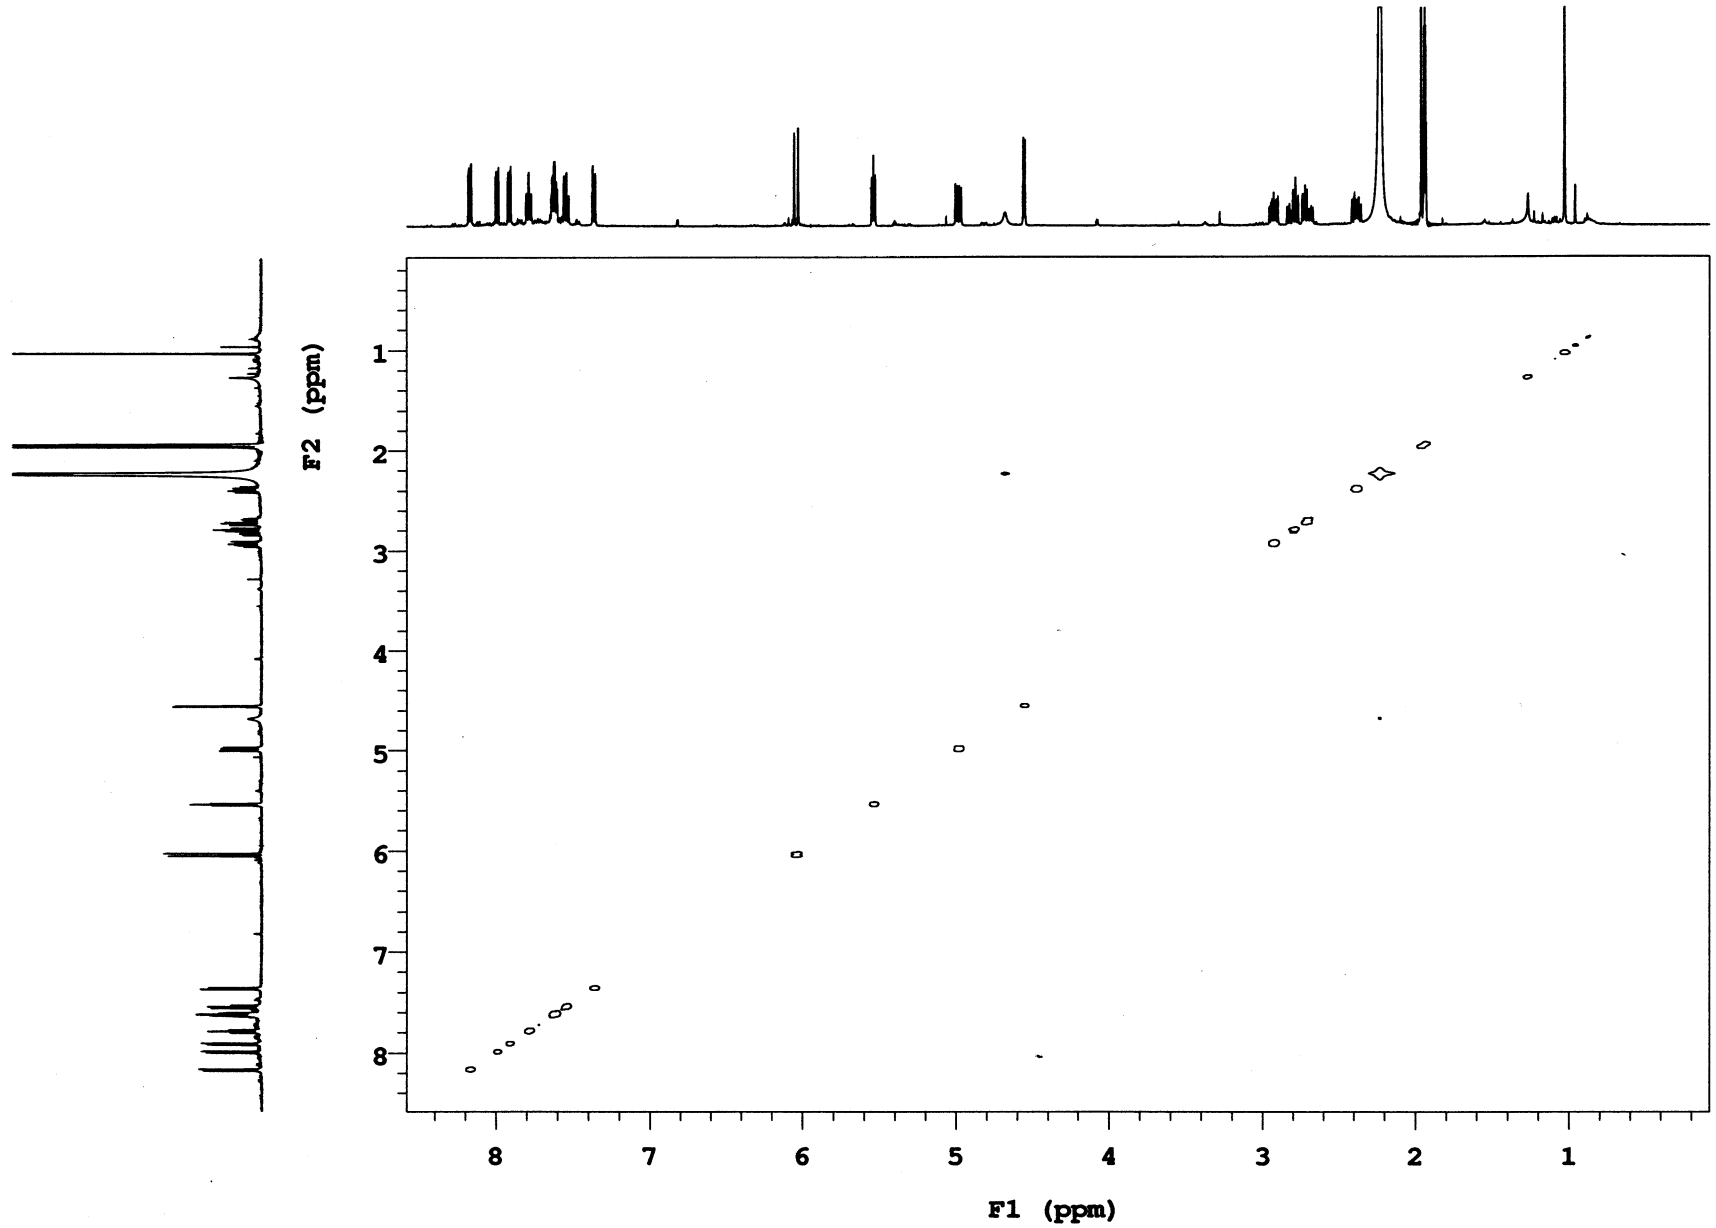

Fig S146. <sup>1</sup>H NMR (CDCl<sub>3</sub>, 400 MHz) of compound 4a.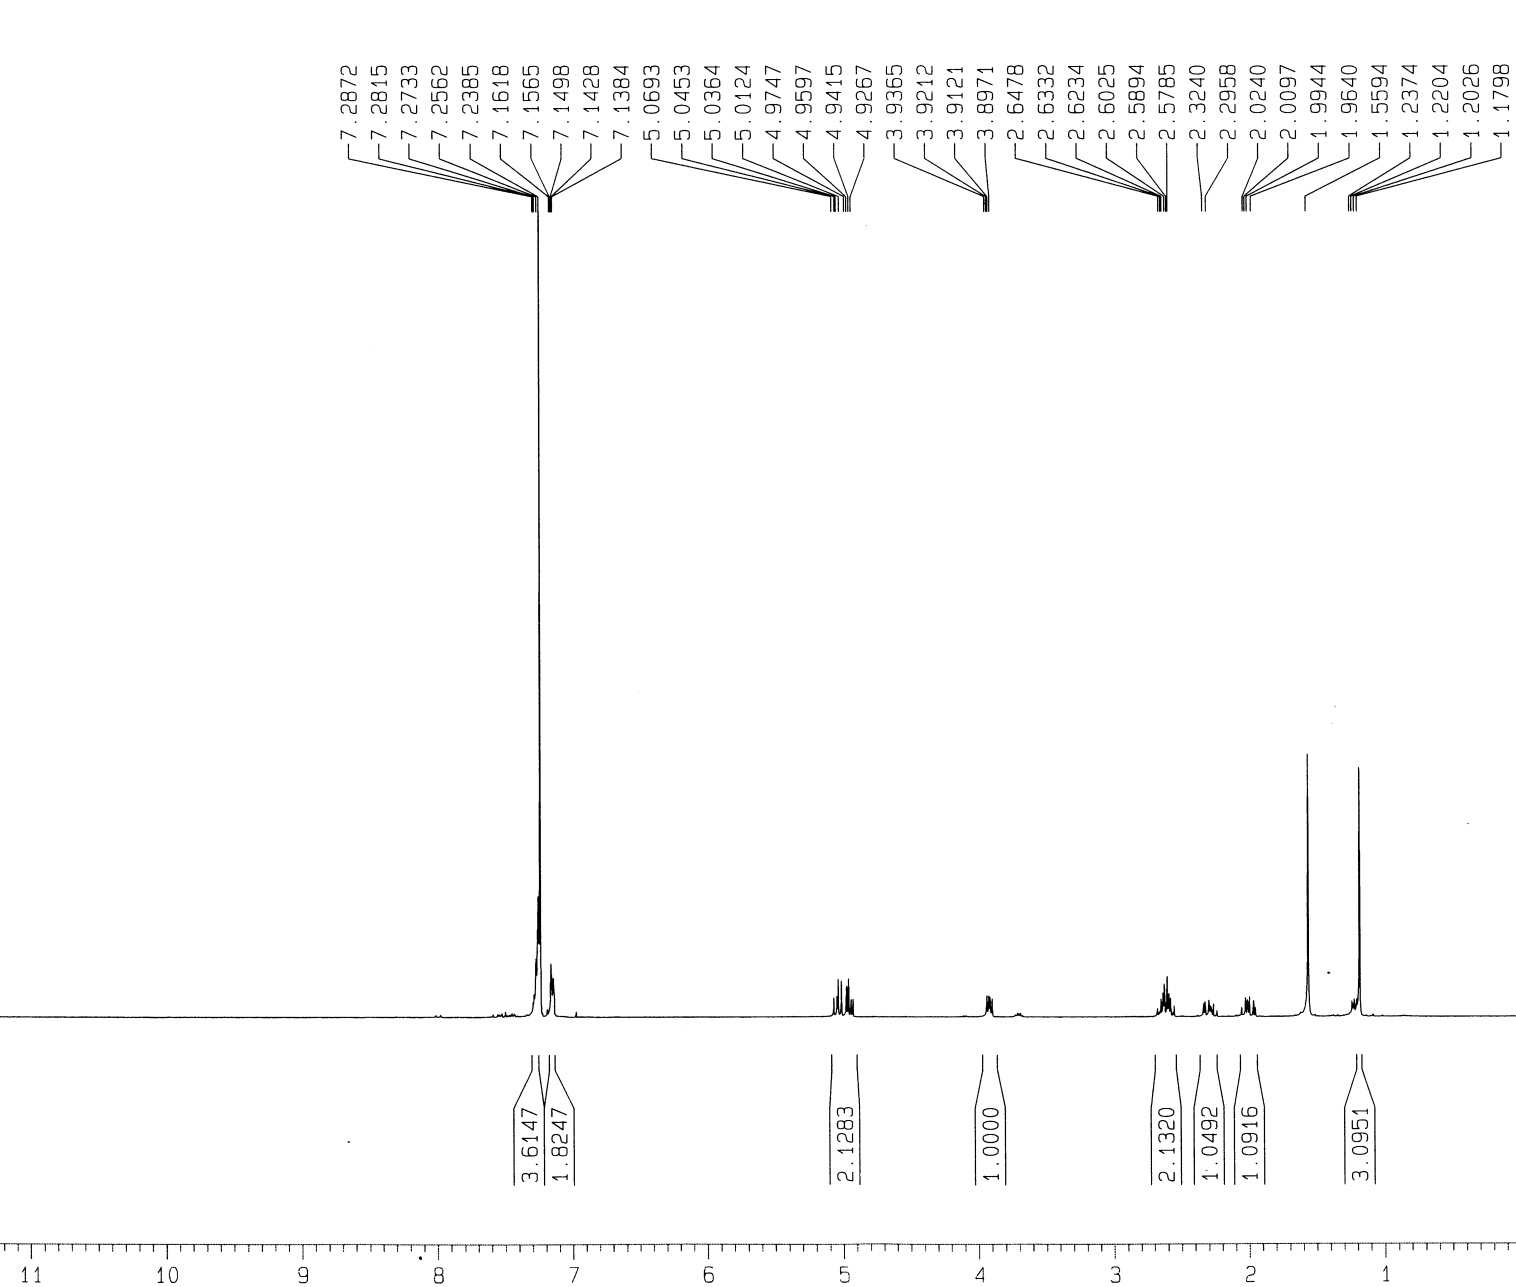

Current Data Parameters  
 NAME CJW-2-20-top  
 EXPNO 1  
 PROCNO 1

## F2 - Acquisition Parameters

Date\_ 20141113  
 Time 14.13  
 INSTRUM spect  
 PROBHD 5 mm QNP 1H  
 PULPROG zg30  
 TD 16384  
 SOLVENT CDCl3  
 NS 32  
 DS 0  
 SWH 5995.204 Hz  
 FIDRES 0.365918 Hz  
 AQ 1.3664756 sec  
 RG 4597.6  
 DW 83.400 usec  
 DE 6.50 usec  
 TE 300.0 K  
 D1 1.50000000 sec

===== CHANNEL f1 =====  
 NUC1 1H  
 P1 11.90 usec  
 PL1 -3.00 dB  
 SF01 400.1326008 MHz

## F2 - Processing parameters

SI 8192  
 SF 400.1300179 MHz  
 WDW EM  
 SSB 0  
 LB 0.10 Hz  
 GB 0  
 PC 1.00

## 1D NMR plot parameters

CX 21.50 cm  
 F1P 12.000 ppm  
 F1 4801.56 Hz  
 F2P -0.000 ppm  
 F2 -0.00 Hz  
 PPMCM 0.55814 ppm/cm  
 HZCM 223.32838 Hz/cm

Fig S147. <sup>13</sup>C NMR (CDCl<sub>3</sub>, 100 MHz) of compound 4a.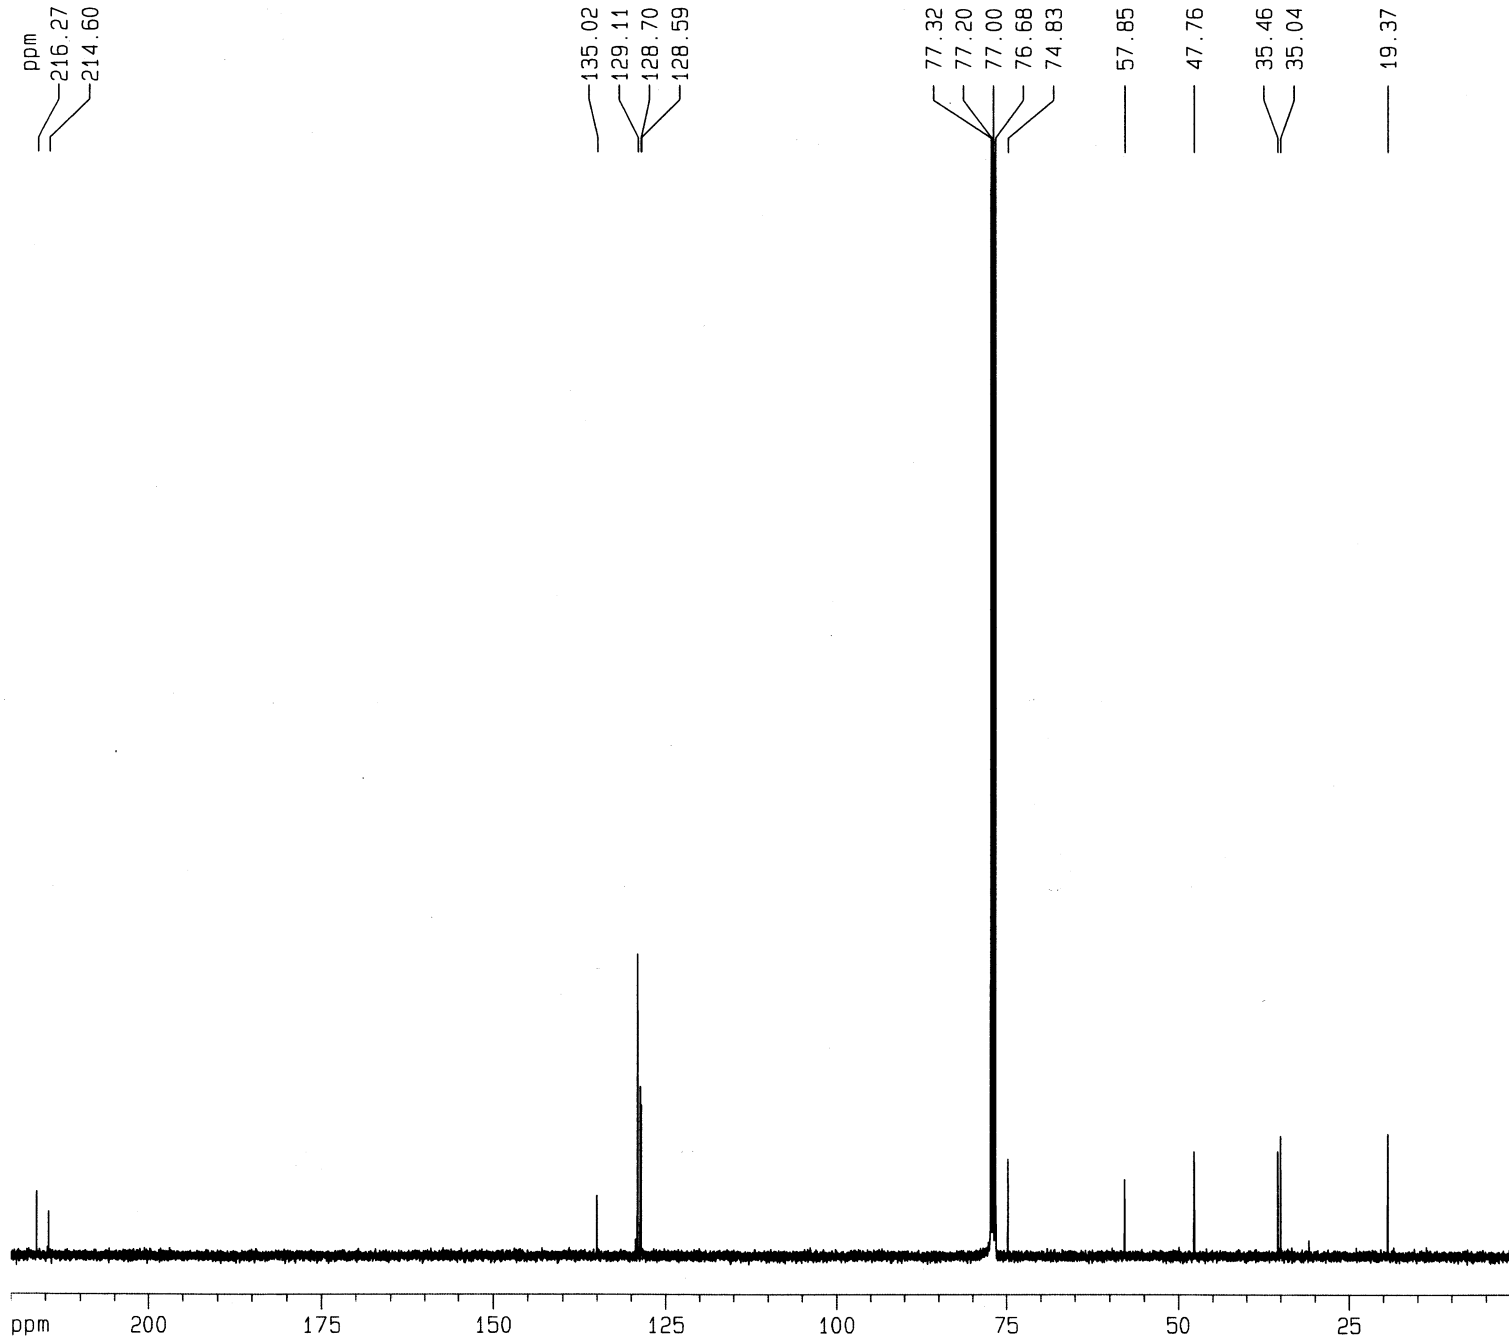

Current Data Parameters  
 NAME CJW-2-20-top  
 EXPNO 3  
 PROCNO 1

F2 - Acquisition Parameters  
 Date\_ 20141114  
 Time 4.37  
 INSTRUM spect  
 PROBHD 5 mm QNP 1H  
 PULPROG zgpg30  
 TD 65536  
 SOLVENT CDCl3  
 NS 5120  
 DS 4  
 SWH 25125.629 Hz  
 FIDRES 0.383387 Hz  
 AQ 1.3042164 sec  
 RG 256  
 DW 19.900 usec  
 DE 6.50 usec  
 TE 300.0 K  
 D1 2.00000000 sec  
 d11 0.03000000 sec  
 d12 0.00002000 sec

===== CHANNEL f1 =====  
 NUC1 13C  
 P1 10.20 usec  
 PL1 0.00 dB  
 SF01 100.6237959 MHz

===== CHANNEL f2 =====  
 CPDPRG2 waltz16  
 NUC2 1H  
 PCPD2 90.00 usec  
 PL2 -3.00 dB  
 PL12 14.50 dB  
 PL13 17.50 dB  
 SF02 400.1326008 MHz

F2 - Processing parameters  
 SI 32768  
 SF 100.6127715 MHz  
 WDW EM  
 SSB 0  
 LB 0.30 Hz  
 GB 0  
 PC 1.40

1D NMR plot parameters  
 CX 20.00 cm  
 CY 20.00 cm  
 F1P 220.000 ppm  
 F1 22134.81 Hz  
 F2P 0.000 ppm  
 F2 0.00 Hz  
 PPMCM 11.00000 ppm/cm  
 HZCM 1106.74048 Hz/cm

Fig S148. DEPT of compound 4a.

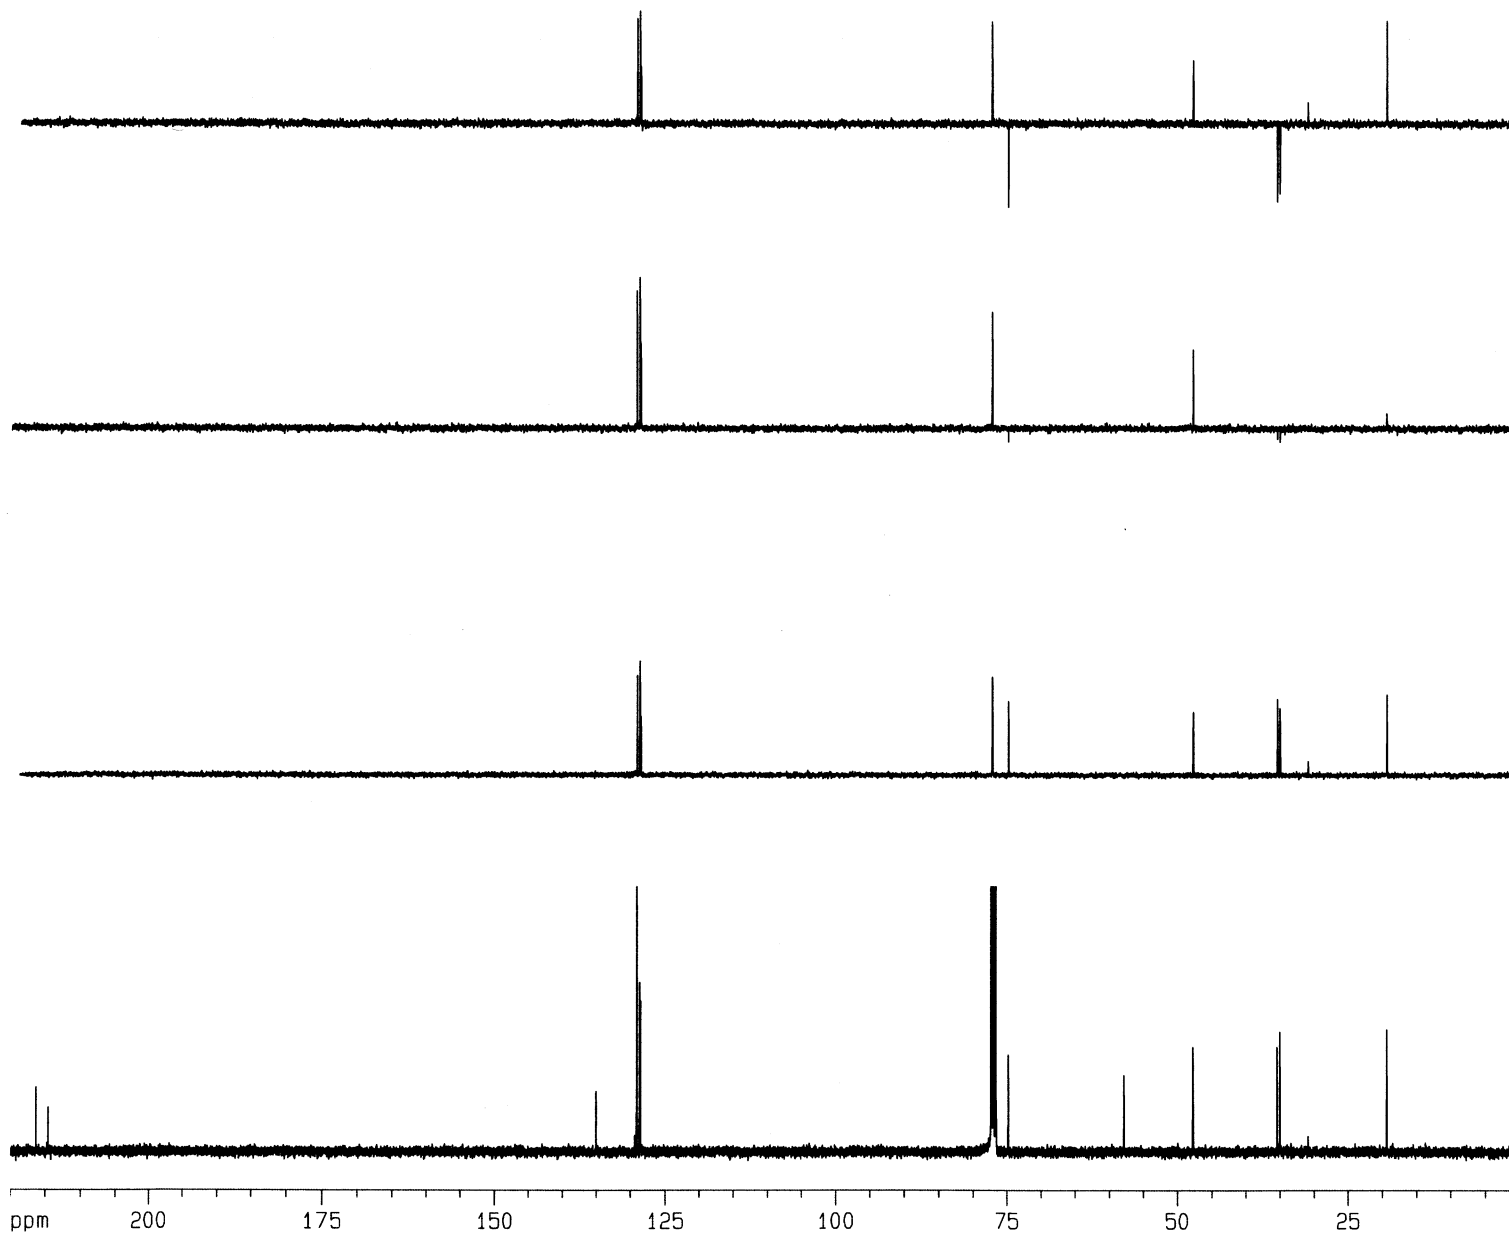

## Current Data Parameters

NAME CJW-2-20-top  
EXPNO 3  
PROCNO 1

## F2 - Acquisition Parameters

Date\_ 20141114  
Time 4.37  
INSTRUM spect  
PROBHD 5 mm GNP 1H  
PULPROG zgpg30  
TD 65536  
SOLVENT CDC13  
NS 5120  
DS 4  
SWH 25125.629 Hz  
FIDRES 0.383387 Hz  
AQ 1.3042164 sec  
RG 256  
DW 19.900 usec  
DE 6.50 usec  
TE 300.0 K  
D1 2.0000000 sec  
d11 0.0300000 sec  
d12 0.0000200 sec

## ===== CHANNEL f1 =====

NUC1 13C  
P1 10.20 usec  
PL1 0.00 dB  
SF01 100.6237959 MHz

## ===== CHANNEL f2 =====

CPDPRG2 waltz16  
NUC2 1H  
PCPD2 90.00 usec  
PL2 -3.00 dB  
PL12 14.50 dB  
PL13 17.50 dB  
SF02 400.1326008 MHz

## F2 - Processing parameters

SI 32768  
SF 100.6127715 MHz  
WDW EM  
SSB 0  
LB 0.30 Hz  
GB 0  
PC 1.40

## 1D NMR plot parameters

CX 20.00 cm  
CY 20.00 cm  
F1P 220.000 ppm  
F1 22134.81 Hz  
F2P 0.000 ppm  
F2 0.00 Hz  
PPMCM 11.00000 ppm/cm  
HZCM 1106.74048 Hz/cm



**D-2000 Elite HPLC System Manager Report**

Analyzed Date and Time: 03/04/2016

Reported Date and Time: 03/06/2016

01:33 PM

02:14 PM

Processed Date and Time: 03/06/2016

02:13 PM

Data Path: D:\Arun\DATA\0427\

Processing Method: test-THF/Hx-Final II

System (acquisition): Sys 1

Series: 0427

Application(data): Arun

Vial Number: 1

Sample Name: CHP-01-50

Vial Type: UNK

Injection from this vial: 1 of 1

Volume: 20.0 ul

Sample Description: 13%THF+HX 1.0 mL/MIN COL-IC

Chrom Type: Fixed WL Chromatogram, 217 nm

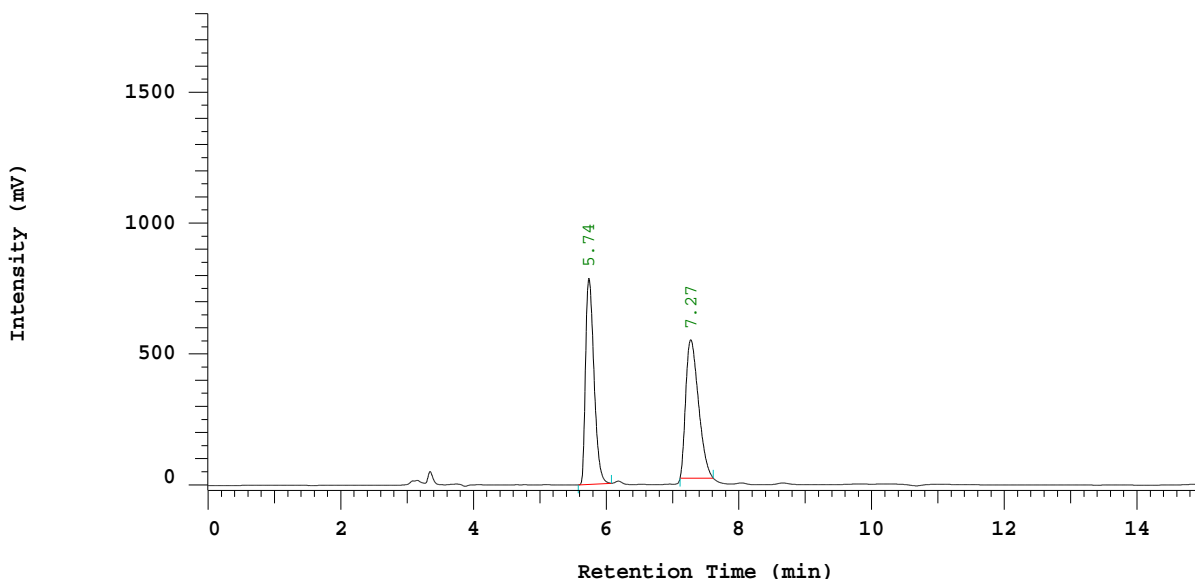

Processing Method: test-THF/Hx-Final II

Column Type: IC

Method Developer: ARUN

Method Description:

Chrom Type: Fixed WL Chromatogram, 217 nm

Peak Quantitation: AREA

Calculation Method: EXT-STD

Scale Factor 1: 1.000

| No. | RT   | Area     | Height  | Area %  |
|-----|------|----------|---------|---------|
| 1   | 5.74 | 6951809  | 787157  | 49.727  |
| 2   | 7.27 | 7028108  | 528549  | 50.273  |
|     |      | 13979917 | 1315706 | 100.000 |

Peak rejection level: 5000

Fig S149. HPLC analysis of the compound **3a** obtained, (Table 1, entry 6)

**D-2000 Elite HPLC System Manager Report**Analyzed Date and Time: 03/04/2016  
01:58 PMReported Date and Time: 03/06/2016  
02:09 PMProcessed Date and Time: 03/06/2016  
02:08 PM

Data Path: D:\Arun\DATA\0428\

Processing Method: test-THF/Hx-Final II

System (acquisition): Sys 1

Series: 0428

Application(data): Arun

Vial Number: 1

Sample Name: CHP-01-51

Vial Type: UNK

Injection from this vial: 1 of 1

Volume: 20.0 ul

Sample Description: 13%THF+HX 1.0 mL/MIN COL-IC

Chrom Type: Fixed WL Chromatogram, 217 nm

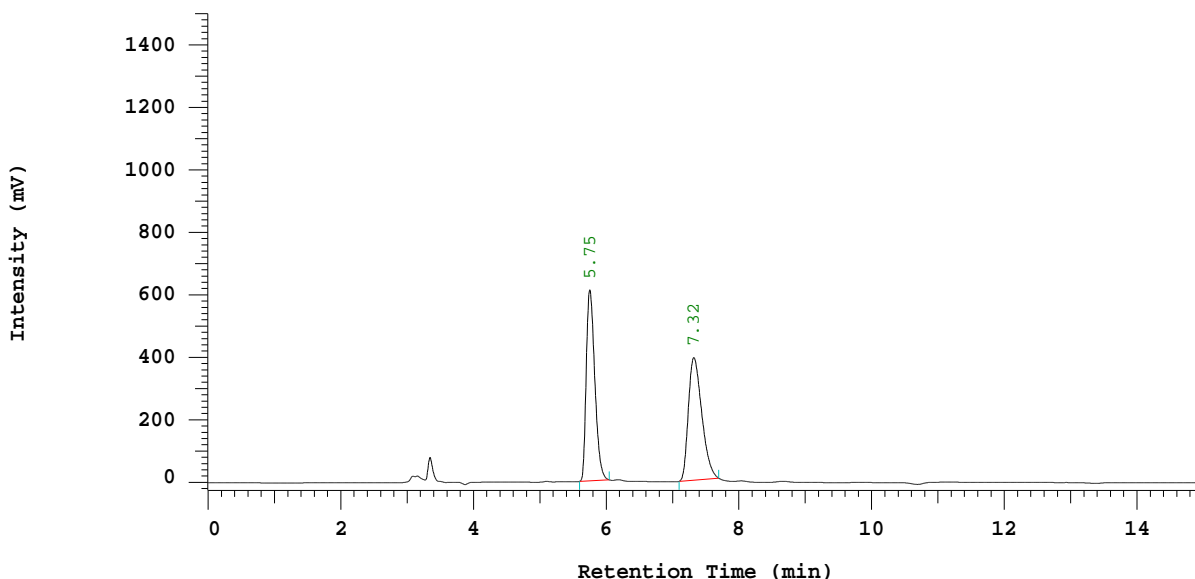

Processing Method: test-THF/Hx-Final II

Column Type: IC

Method Developer: ARUN

Method Description:

Chrom Type: Fixed WL Chromatogram, 217 nm

Peak Quantitation: AREA

Calculation Method: EXT-STD

Scale Factor 1: 1.000

| No. | RT   | Area     | Height  | Area %  |
|-----|------|----------|---------|---------|
| 1   | 5.75 | 5453257  | 611259  | 49.736  |
| 2   | 7.32 | 5511103  | 392354  | 50.264  |
|     |      | 10964360 | 1003613 | 100.000 |

Peak rejection level: 5000

Fig S150. HPLC analysis of the compound **3a** obtained, (Table 1, entry 7)

**D-2000 Elite HPLC System Manager Report**Analyzed Date and Time: 03/04/2016  
02:57 PMReported Date and Time: 03/06/2016  
02:06 PMProcessed Date and Time: 03/06/2016  
02:06 PM

Data Path: D:\Arun\DATA\0429\

Processing Method: test-THF/Hx-Final II

System (acquisition): Sys 1

Series: 0429

Application(data): Arun

Vial Number: 1

Sample Name: CHP-01-52

Vial Type: UNK

Injection from this vial: 1 of 1

Volume: 20.0 ul

Sample Description: 13%THF+HX 1.0 mL/MIN COL-IC

Chrom Type: Fixed WL Chromatogram, 217 nm

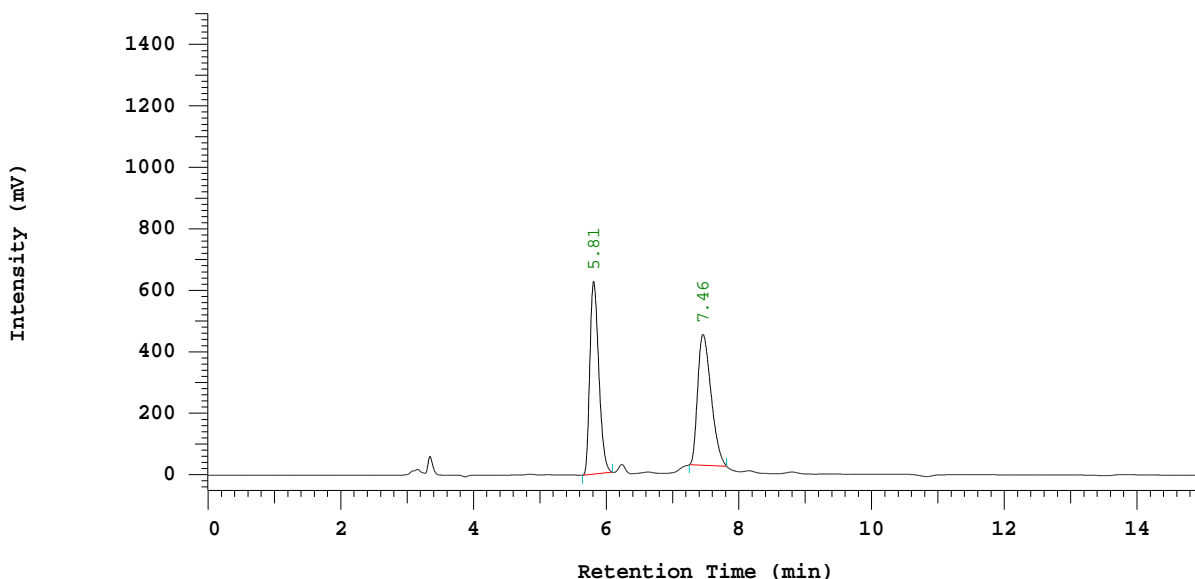

Processing Method: test-THF/Hx-Final II

Column Type: IC

Method Developer: ARUN

Method Description:

Chrom Type: Fixed WL Chromatogram, 217 nm

Peak Quantitation: AREA

Calculation Method: EXT-STD

Scale Factor 1: 1.000

| No. | RT   | Area     | Height  | Area %  |
|-----|------|----------|---------|---------|
| 1   | 5.81 | 5885371  | 626405  | 49.589  |
| 2   | 7.46 | 5983016  | 425624  | 50.411  |
|     |      | 11868387 | 1052029 | 100.000 |

Peak rejection level: 5000

Fig S151. HPLC analysis of the compound **3a** obtained, (Table 1, entry 8)

**D-2000 Elite HPLC System Manager Report**Analyzed Date and Time: 03/03/2016  
04:10 PMReported Date and Time: 03/03/2016  
04:40 PMProcessed Date and Time: 03/03/2016  
04:39 PM

Data Path: D:\Arun\DATA\0426\

Processing Method: test-THF/Hx-Final II

System (acquisition): Sys 1

Series: 0426

Application(data): Arun

Vial Number: 1

Sample Name: AR-03-173 (Racemic)

Vial Type: UNK

Injection from this vial: 1 of 1

Volume: 20.0 ul

Sample Description: 13%THF+HX 1.0 mL/MIN COL-IC

Chrom Type: Fixed WL Chromatogram, 217 nm

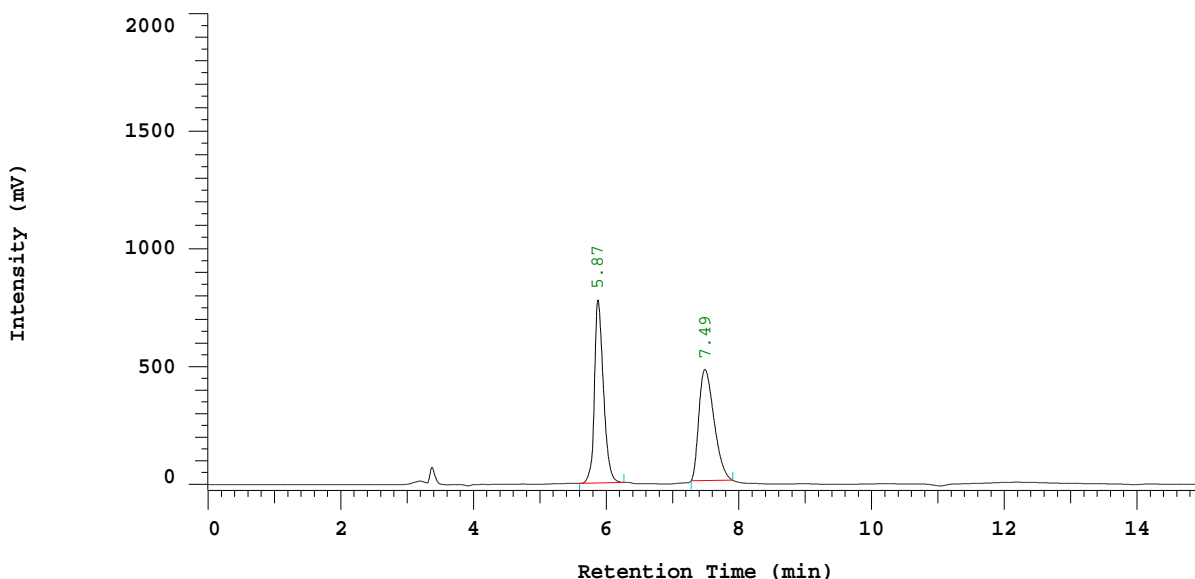

Processing Method: test-THF/Hx-Final II

Column Type: IC

Method Developer: ARUN

Method Description:

Chrom Type: Fixed WL Chromatogram, 217 nm

Peak Quantitation: AREA

Calculation Method: EXT-STD

Scale Factor 1: 1.000

| No. | RT   | Area     | Height  | Area %  |
|-----|------|----------|---------|---------|
| 1   | 5.87 | 7350442  | 777507  | 49.556  |
| 2   | 7.49 | 7482187  | 472766  | 50.444  |
|     |      | 14832629 | 1250273 | 100.000 |

Peak rejection level: 5000

Fig S152. HPLC analysis of the compound **3a** obtained, (Table 1, entry 9)

### D-2000 Elite HPLC System Manager Report

Analyzed Date and Time: 06/23/2016  
05:55 PM

Reported Date and Time: 07/01/2016  
01:13 PM

Processed Date and Time: 07/01/2016  
01:13 PM

Data Path: D:\Arun\DATA\0469\

Processing Method: test-THF/Hx-Final II

System (acquisition): Sys 1

Series: 0469

Application(data): Arun

Vial Number: 1

Sample Name: CHP-8g-F2 (Crystal 3)

Vial Type: UNK

Injection from this vial: 1 of 1

Volume: 20.0 ul

Sample Description: 25%THF+HX 1.0 mL/MIN COL-IC

Chrom Type: Fixed WL Chromatogram, 254 nm

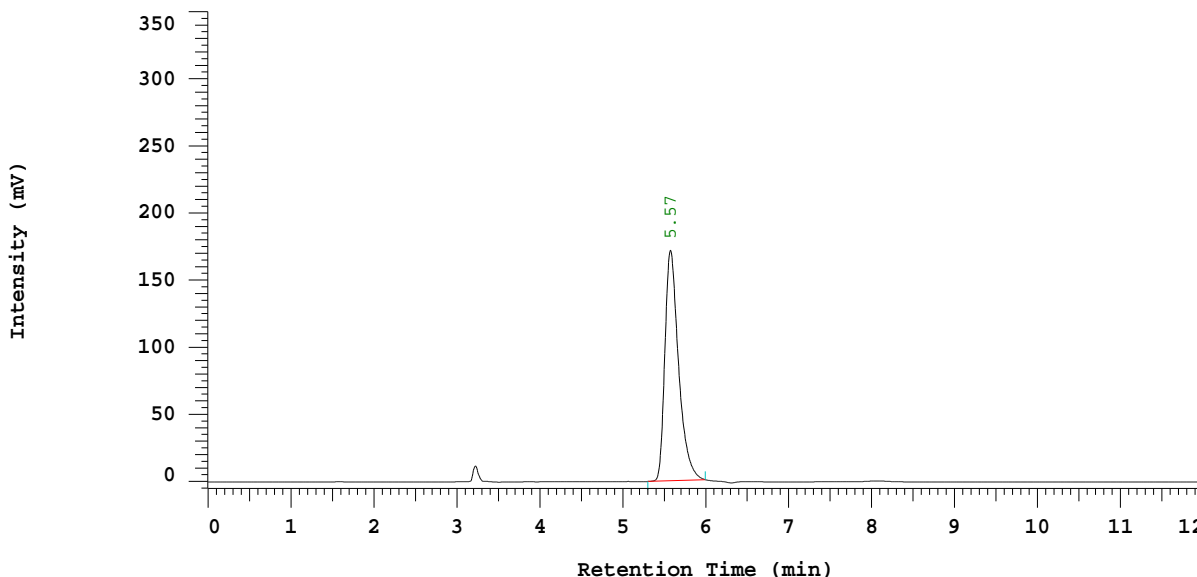

Processing Method: test-THF/Hx-Final II

Column Type: IC

Method Developer: ARUN

Method Description:

Chrom Type: Fixed WL Chromatogram, 254 nm

Peak Quantitation: AREA

Calculation Method: EXT-STD

Scale Factor 1: 1.000

| No. | RT   | Area    | Height | Area %  |
|-----|------|---------|--------|---------|
| 1   | 5.57 | 1965962 | 171710 | 100.000 |
|     |      | 1965962 | 171710 | 100.000 |

Peak rejection level: 5000

Fig S153. HPLC analysis of a crystal of the (+)-3i obtained (crystal count number 1)

**D-2000 Elite HPLC System Manager Report**Analyzed Date and Time: 06/24/2016  
12:22 PMReported Date and Time: 07/01/2016  
01:07 PMProcessed Date and Time: 07/01/2016  
01:07 PM

Data Path: D:\Arun\DATA\0474\

Processing Method: test-THF/Hx-Final II

System (acquisition): Sys 1

Series: 0474

Application(data): Arun

Vial Number: 1

Sample Name: CHP-8g-F2 (Crys 1)

Vial Type: UNK

Injection from this vial: 1 of 1

Volume: 20.0 ul

Sample Description: 25%THF+HX 1.0 mL/MIN COL-IC

Chrom Type: Fixed WL Chromatogram, 254 nm

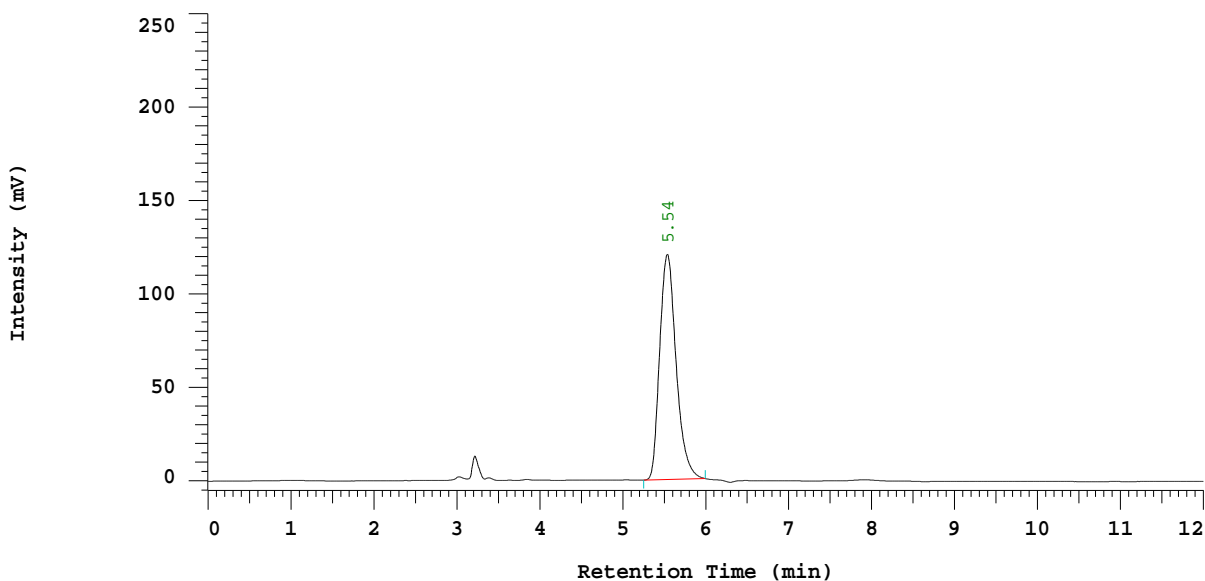

Processing Method: test-THF/Hx-Final II

Column Type: IC

Method Developer: ARUN

Method Description:

Chrom Type: Fixed WL Chromatogram, 254 nm

Peak Quantitation: AREA

Calculation Method: EXT-STD

Scale Factor 1: 1.000

| No. | RT   | Area    | Height | Area %  |
|-----|------|---------|--------|---------|
| 1   | 5.54 | 1660111 | 120449 | 100.000 |
|     |      | 1660111 | 120449 | 100.000 |

Peak rejection level: 5000

Fig S154. HPLC analysis of a crystal of the (+)-**3i** obtained (crystal count number 2)

**D-2000 Elite HPLC System Manager Report**Analyzed Date and Time: 06/24/2016  
12:50 PMReported Date and Time: 07/01/2016  
01:04 PMProcessed Date and Time: 07/01/2016  
01:04 PM

Data Path: D:\Arun\DATA\0476\

Processing Method: test-THF/Hx-Final II

System (acquisition): Sys 1

Series: 0476

Application(data): Arun

Vial Number: 3

Sample Name: CHP-8g-F2 (Crys 3)

Vial Type: UNK

Injection from this vial: 1 of 1

Volume: 20.0 ul

Sample Description: 25%THF+HX 1.0 mL/MIN COL-IC

Chrom Type: Fixed WL Chromatogram, 254 nm

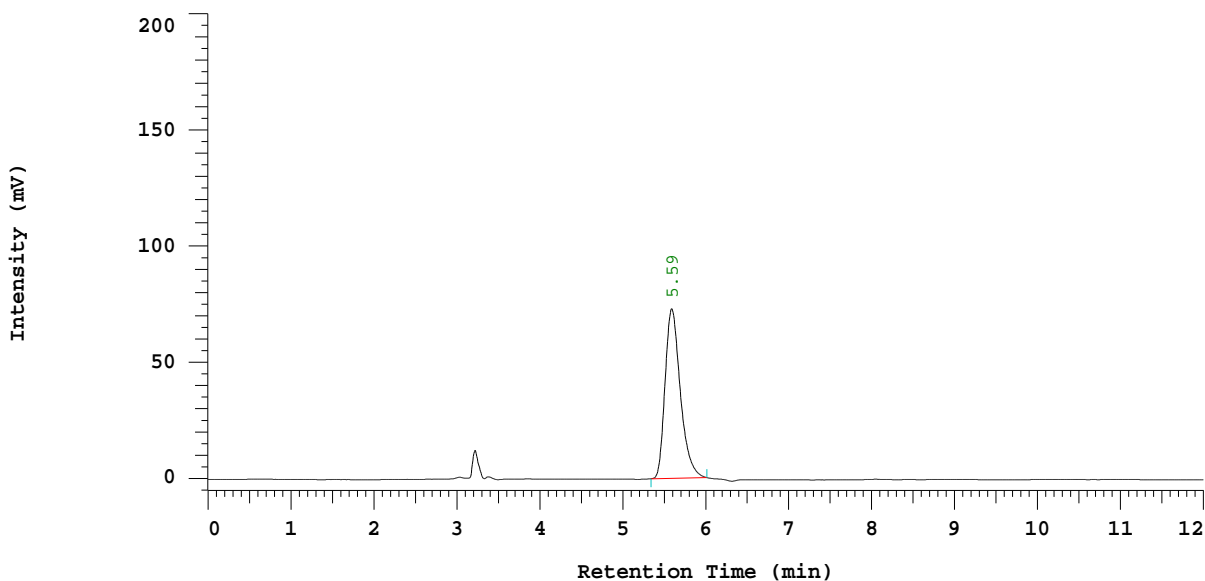

Processing Method: test-THF/Hx-Final II

Column Type: IC

Method Developer: ARUN

Method Description:

Chrom Type: Fixed WL Chromatogram, 254 nm

Peak Quantitation: AREA

Calculation Method: EXT-STD

Scale Factor 1: 1.000

| No. | RT   | Area   | Height | Area %  |
|-----|------|--------|--------|---------|
| 1   | 5.59 | 932401 | 72897  | 100.000 |
|     |      | 932401 | 72897  | 100.000 |

Peak rejection level: 5000

Fig S155. HPLC analysis of a crystal of the (+)-**3i** obtained (crystal count number 3)

**D-2000 Elite HPLC System Manager Report**Analyzed Date and Time: 06/26/2016  
04:01 PMReported Date and Time: 07/01/2016  
12:55 PMProcessed Date and Time: 07/01/2016  
12:54 PM

Data Path: D:\Arun\DATA\0480\

Processing Method: test-THF/Hx-Final II

System (acquisition): Sys 1

Series: 0480

Application(data): Arun

Vial Number: 1

Sample Name: CHP-8g-F2 (Crys 1)

Vial Type: UNK

Injection from this vial: 1 of 1

Volume: 20.0 ul

Sample Description: 25%THF+HX 1.0 mL/MIN COL-IC

Chrom Type: Fixed WL Chromatogram, 254 nm

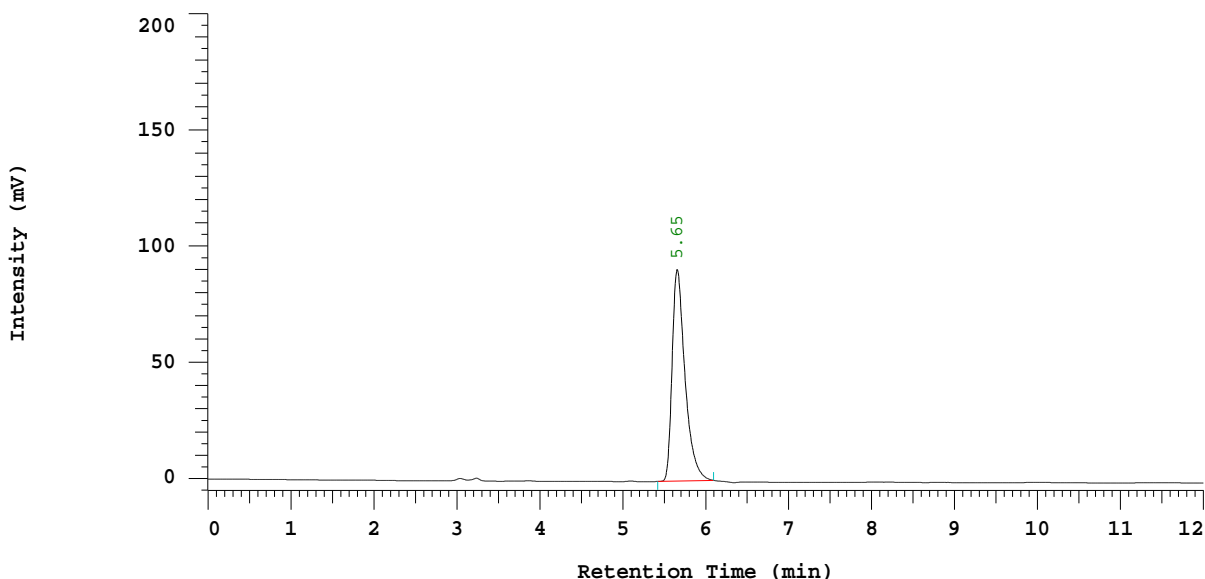

Processing Method: test-THF/Hx-Final II

Column Type: IC

Method Developer: ARUN

Method Description:

Chrom Type: Fixed WL Chromatogram, 254 nm

Peak Quantitation: AREA

Calculation Method: EXT-STD

Scale Factor 1: 1.000

| No. | RT   | Area   | Height | Area %  |
|-----|------|--------|--------|---------|
| 1   | 5.65 | 982521 | 90981  | 100.000 |
|     |      | 982521 | 90981  | 100.000 |

Peak rejection level: 5000

Fig S156. HPLC analysis of a crystal of the (+)-**3i** obtained (crystal count number 4)



**D-2000 Elite HPLC System Manager Report**

Analyzed Date and Time: 06/26/2016  
04:15 PM

Reported Date and Time: 07/01/2016  
12:53 PM

Processed Date and Time: 07/01/2016  
12:53 PM

Data Path: D:\Arun\DATA\0481\

Processing Method: test-THF/Hx-Final II

System (acquisition): Sys 1

Series: 0481

Application(data): Arun

Vial Number: 2

Sample Name: CHP-8g-F2 (Crys 2)

Vial Type: UNK

Injection from this vial: 1 of 1

Volume: 20.0 ul

Sample Description: 25%THF+HX 1.0 mL/MIN COL-IC

Chrom Type: Fixed WL Chromatogram, 254 nm

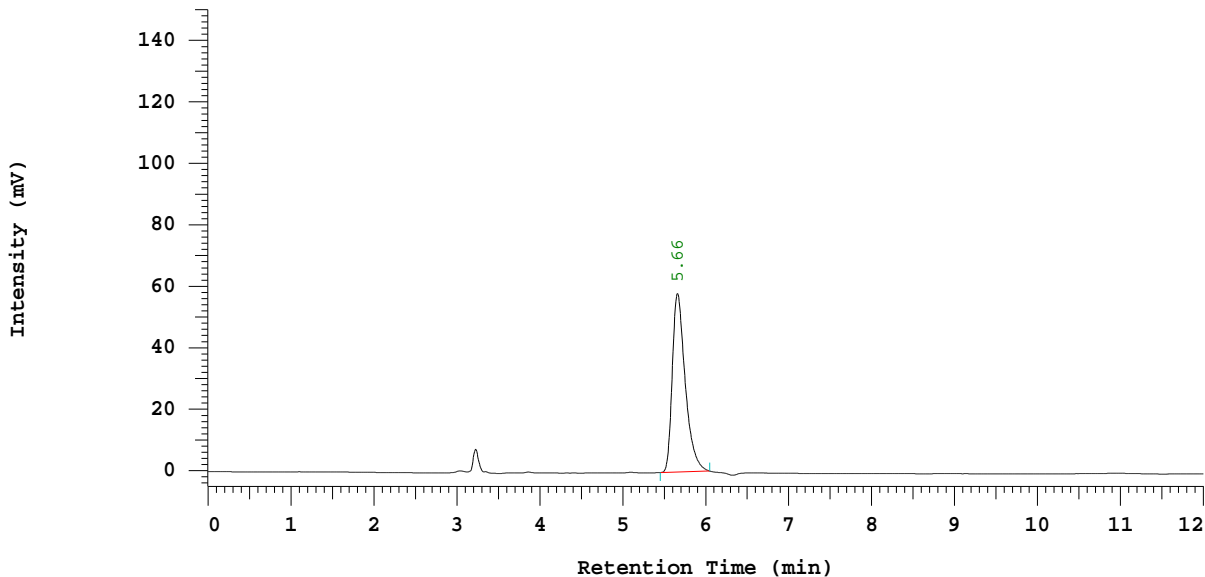

Processing Method: test-THF/Hx-Final II

Column Type: IC

Method Developer: ARUN

Method Description:

Chrom Type: Fixed WL Chromatogram, 254 nm

Peak Quantitation: AREA

Calculation Method: EXT-STD

Scale Factor 1: 1.000

| No. | RT   | Area   | Height | Area %  |
|-----|------|--------|--------|---------|
| 1   | 5.66 | 629116 | 58061  | 100.000 |
|     |      | 629116 | 58061  | 100.000 |

Peak rejection level: 5000

Fig S157. HPLC analysis of a crystal of the (+)-**3i** obtained (crystal count number 5)

**D-2000 Elite HPLC System Manager Report**Analyzed Date and Time: 06/26/2016  
04:28 PMReported Date and Time: 07/01/2016  
12:52 PMProcessed Date and Time: 07/01/2016  
12:51 PM

Data Path: D:\Arun\DATA\0482\

Processing Method: test-THF/Hx-Final II

System (acquisition): Sys 1

Series: 0482

Application(data): Arun

Vial Number: 3

Sample Name: CHP-8g-F2 (Crys 3)

Vial Type: UNK

Injection from this vial: 1 of 1

Volume: 20.0 ul

Sample Description: 25%THF+HX 1.0 mL/MIN COL-IC

Chrom Type: Fixed WL Chromatogram, 254 nm

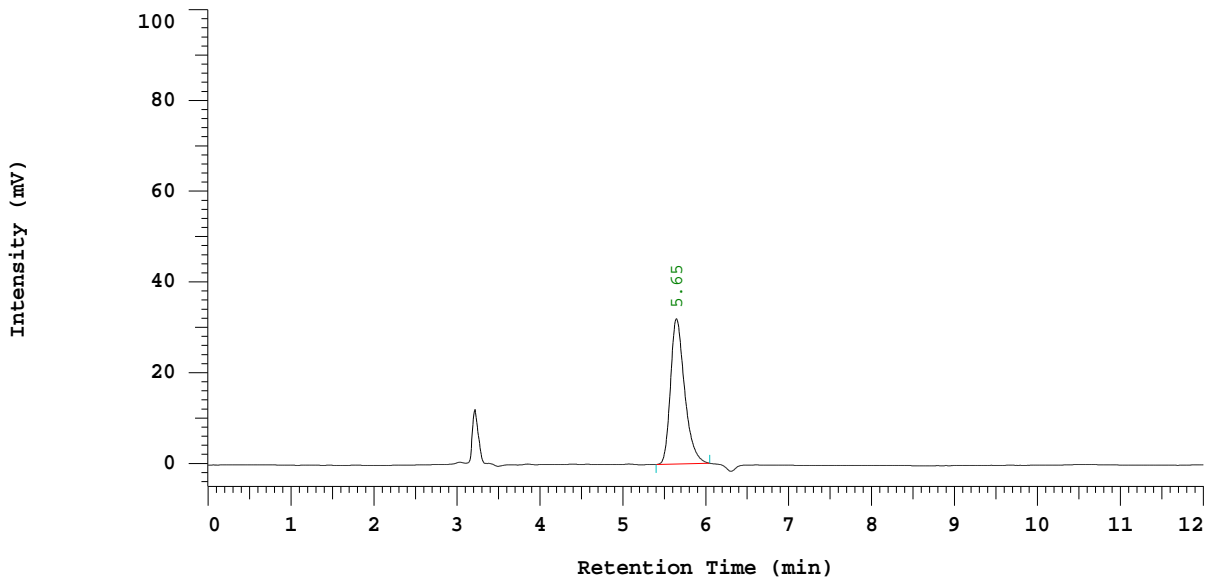

Processing Method: test-THF/Hx-Final II

Column Type: IC

Method Developer: ARUN

Method Description:

Chrom Type: Fixed WL Chromatogram, 254 nm

Peak Quantitation: AREA

Calculation Method: EXT-STD

Scale Factor 1: 1.000

| No. | RT   | Area   | Height | Area %  |
|-----|------|--------|--------|---------|
| 1   | 5.65 | 378230 | 32017  | 100.000 |
|     |      | 378230 | 32017  | 100.000 |

Peak rejection level: 5000

Fig S158. HPLC analysis of a crystal of the (+)-**3i** obtained (crystal count number 6)

**D-2000 Elite HPLC System Manager Report**Analyzed Date and Time: 06/27/2016  
04:18 PMReported Date and Time: 07/01/2016  
12:44 PMProcessed Date and Time: 07/01/2016  
12:44 PM

Data Path: D:\Arun\DATA\0486\

Processing Method: test-THF/Hx-Final II

System (acquisition): Sys 1

Series: 0486

Application(data): Arun

Vial Number: 2

Sample Name: CHP-8g-F2 (Crys 2)

Vial Type: UNK

Injection from this vial: 1 of 1

Volume: 20.0 ul

Sample Description: 25%THF+HX 1.0 mL/MIN COL-IC

Chrom Type: Fixed WL Chromatogram, 254 nm

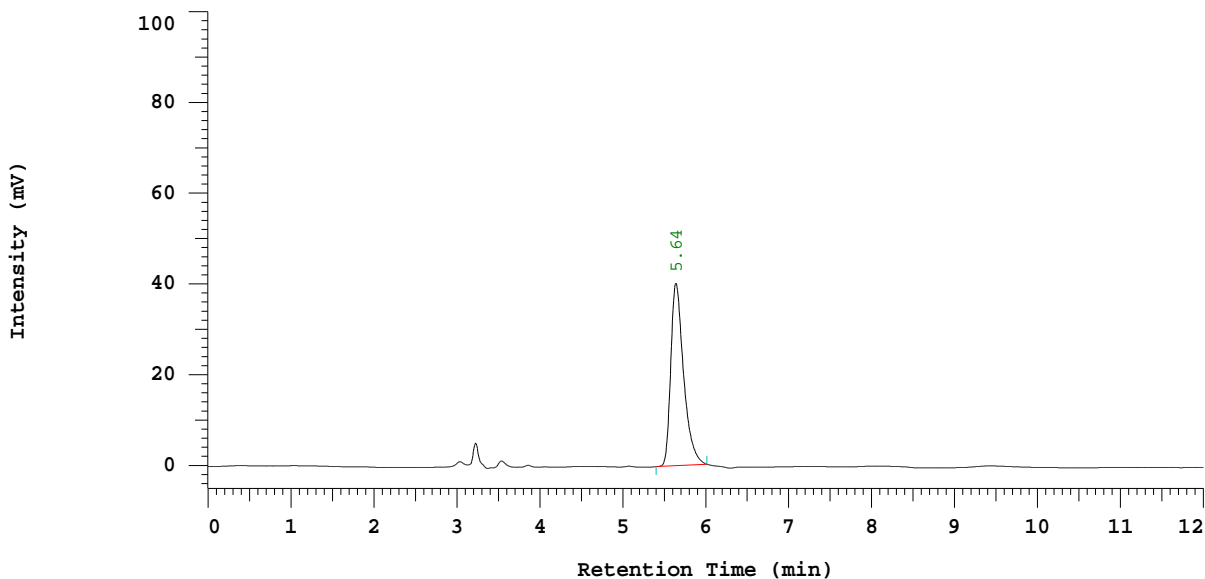

Processing Method: test-THF/Hx-Final II

Column Type: IC

Method Developer: ARUN

Method Description:

Chrom Type: Fixed WL Chromatogram, 254 nm

Peak Quantitation: AREA

Calculation Method: EXT-STD

Scale Factor 1: 1.000

| No. | RT   | Area   | Height | Area %  |
|-----|------|--------|--------|---------|
| 1   | 5.64 | 431230 | 40210  | 100.000 |
|     |      | 431230 | 40210  | 100.000 |

Peak rejection level: 5000

Fig S159. HPLC analysis of a crystal of the (+)-**3i** obtained (crystal count number 7)

**D-2000 Elite HPLC System Manager Report**Analyzed Date and Time: 06/27/2016  
06:00 PMReported Date and Time: 07/01/2016  
12:32 PMProcessed Date and Time: 07/01/2016  
12:32 PM

Data Path: D:\Arun\DATA\0493\

Processing Method: test-THF/Hx-Final II

System (acquisition): Sys 1

Series: 0493

Application(data): Arun

Vial Number: 4

Sample Name: CHP-8g-F2 (Crys 4)

Vial Type: UNK

Injection from this vial: 1 of 1

Volume: 20.0 ul

Sample Description: 25%THF+HX 1.0 mL/MIN COL-IC

Chrom Type: Fixed WL Chromatogram, 254 nm

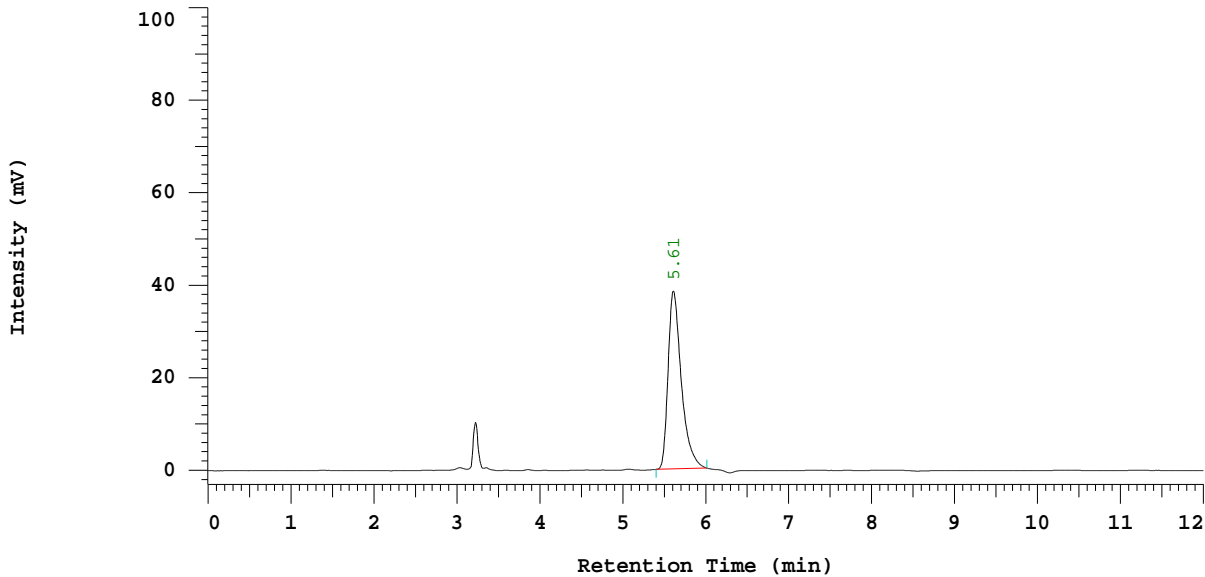

Processing Method: test-THF/Hx-Final II

Column Type: IC

Method Developer: ARUN

Method Description:

Chrom Type: Fixed WL Chromatogram, 254 nm

Peak Quantitation: AREA

Calculation Method: EXT-STD

Scale Factor 1: 1.000

| No. | RT   | Area   | Height | Area %  |
|-----|------|--------|--------|---------|
| 1   | 5.61 | 426716 | 38449  | 100.000 |
|     |      | 426716 | 38449  | 100.000 |

Peak rejection level: 5000

Fig S160. HPLC analysis of a crystal of the (+)-**3i** obtained (crystal count number 8)

### D-2000 Elite HPLC System Manager Report

Analyzed Date and Time: 06/27/2016  
06:16 PM

Reported Date and Time: 07/01/2016  
12:30 PM

Processed Date and Time: 07/01/2016  
12:29 PM

Data Path: D:\Arun\DATA\0494\

Processing Method: test-THF/Hx-Final II

System (acquisition): Sys 1

Series: 0494

Application(data): Arun

Vial Number: 5

Sample Name: CHP-8g-F2 (Crys 5)

Vial Type: UNK

Injection from this vial: 1 of 1

Volume: 20.0 ul

Sample Description: 25%THF+HX 1.0 mL/MIN COL-IC

Chrom Type: Fixed WL Chromatogram, 254 nm

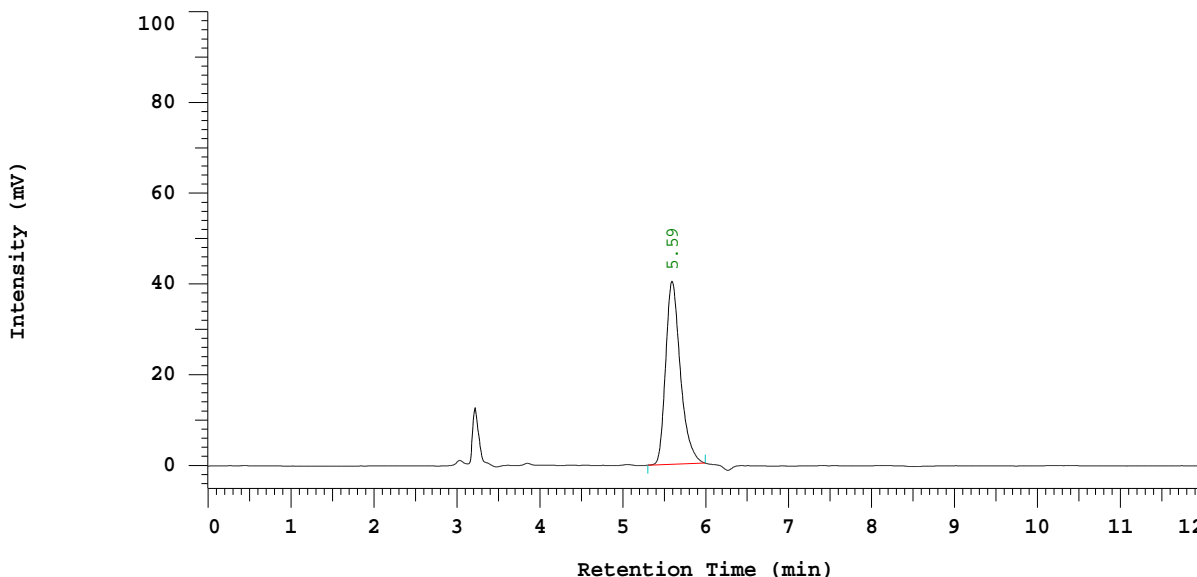

Processing Method: test-THF/Hx-Final II

Column Type: IC

Method Developer: ARUN

Method Description:

Chrom Type: Fixed WL Chromatogram, 254 nm

Peak Quantitation: AREA

Calculation Method: EXT-STD

Scale Factor 1: 1.000

| No. | RT   | Area   | Height | Area %  |
|-----|------|--------|--------|---------|
| 1   | 5.59 | 498296 | 40384  | 100.000 |
|     |      | 498296 | 40384  | 100.000 |

Peak rejection level: 5000

Fig S161. HPLC analysis of a crystal of the (+)-3i obtained (crystal count number 9)

**D-2000 Elite HPLC System Manager Report**Analyzed Date and Time: 06/29/2016  
04:27 PMReported Date and Time: 07/01/2016  
12:23 PMProcessed Date and Time: 07/01/2016  
12:23 PM

Data Path: D:\Arun\DATA\0499\

Processing Method: test-THF/Hx-Final II

System (acquisition): Sys 1

Series: 0499

Application(data): Arun

Vial Number: 3

Sample Name: CHP-8g-F2 (Crys 3)

Vial Type: UNK

Injection from this vial: 1 of 1

Volume: 20.0 ul

Sample Description: 25%THF+HX 1.0 mL/MIN COL-IC

Chrom Type: Fixed WL Chromatogram, 254 nm

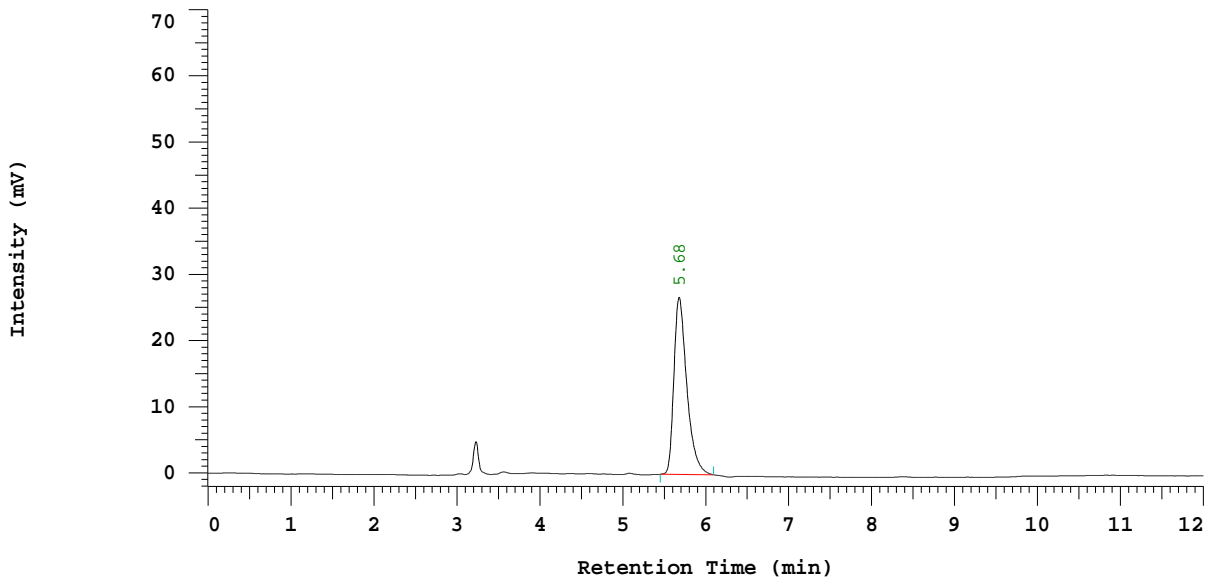

Processing Method: test-THF/Hx-Final II

Column Type: IC

Method Developer: ARUN

Method Description:

Chrom Type: Fixed WL Chromatogram, 254 nm

Peak Quantitation: AREA

Calculation Method: EXT-STD

Scale Factor 1: 1.000

| No. | RT   | Area   | Height | Area %  |
|-----|------|--------|--------|---------|
| 1   | 5.68 | 289629 | 26775  | 100.000 |
|     |      | 289629 | 26775  | 100.000 |

Peak rejection level: 5000

Fig S162. HPLC analysis of a crystal of the (+)-**3i** obtained (crystal count number 10)

**D-2000 Elite HPLC System Manager Report**Analyzed Date and Time: 06/29/2016  
04:40 PMReported Date and Time: 07/01/2016  
12:22 PMProcessed Date and Time: 07/01/2016  
12:22 PM

Data Path: D:\Arun\DATA\0500\

Processing Method: test-THF/Hx-Final II

System (acquisition): Sys 1

Series: 0500

Application(data): Arun

Vial Number: 4

Sample Name: CHP-8g-F2 (Crys 4)

Vial Type: UNK

Injection from this vial: 1 of 1

Volume: 20.0 ul

Sample Description: 25%THF+HX 1.0 mL/MIN COL-IC

Chrom Type: Fixed WL Chromatogram, 254 nm

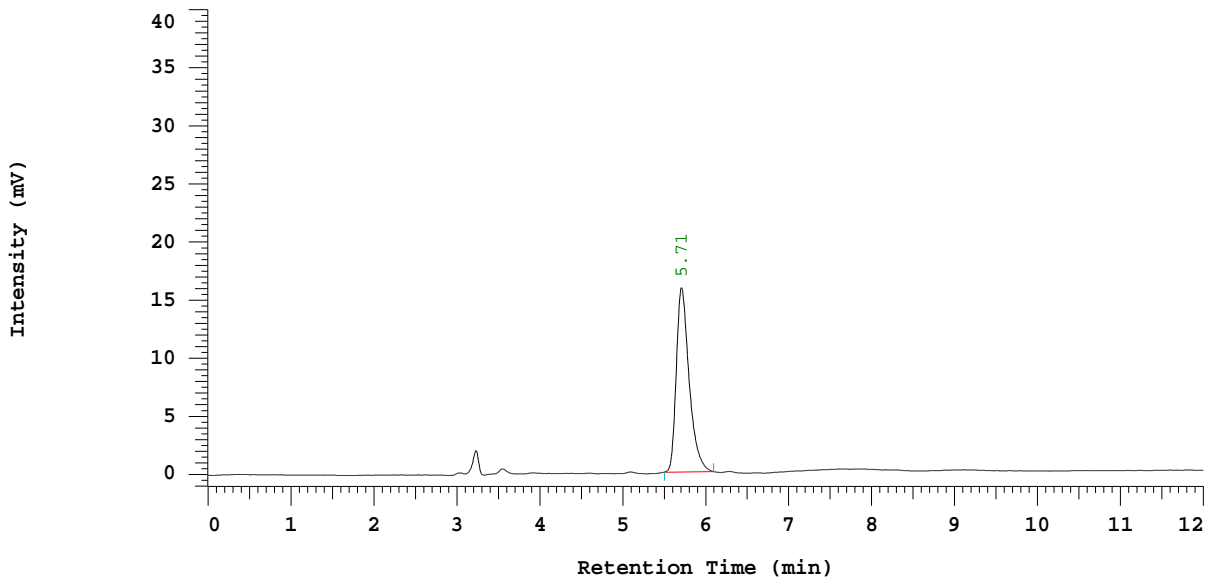

Processing Method: test-THF/Hx-Final II

Column Type: IC

Method Developer: ARUN

Method Description:

Chrom Type: Fixed WL Chromatogram, 254 nm

Peak Quantitation: AREA

Calculation Method: EXT-STD

Scale Factor 1: 1.000

| No. | RT   | Area   | Height | Area %  |
|-----|------|--------|--------|---------|
| 1   | 5.71 | 170488 | 15853  | 100.000 |
|     |      | 170488 | 15853  | 100.000 |

Peak rejection level: 5000

Fig S163. HPLC analysis of a crystal of the (+)-**3i** obtained (crystal count number 11)

**D-2000 Elite HPLC System Manager Report**Analyzed Date and Time: 06/29/2016  
05:34 PMReported Date and Time: 07/01/2016  
12:15 PMProcessed Date and Time: 07/01/2016  
12:14 PM

Data Path: D:\Arun\DATA\0504\

Processing Method: test-THF/Hx-Final II

System (acquisition): Sys 1

Series: 0504

Application(data): Arun

Vial Number: 3

Sample Name: CHP-8g-F2 (Crys 3)

Vial Type: UNK

Injection from this vial: 1 of 1

Volume: 20.0 ul

Sample Description: 25%THF+HX 1.0 mL/MIN COL-IC

Chrom Type: Fixed WL Chromatogram, 254 nm

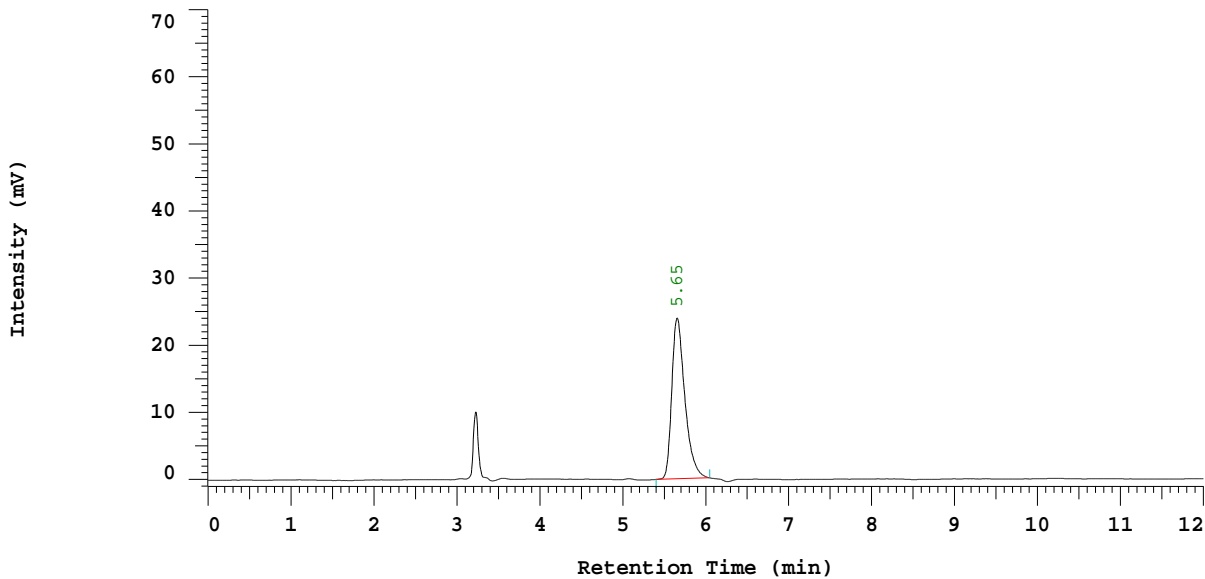

Processing Method: test-THF/Hx-Final II

Column Type: IC

Method Developer: ARUN

Method Description:

Chrom Type: Fixed WL Chromatogram, 254 nm

Peak Quantitation: AREA

Calculation Method: EXT-STD

Scale Factor 1: 1.000

| No. | RT   | Area   | Height | Area %  |
|-----|------|--------|--------|---------|
| 1   | 5.65 | 261816 | 23954  | 100.000 |
|     |      | 261816 | 23954  | 100.000 |

Peak rejection level: 5000

Fig S164. HPLC analysis of a crystal of the (+)-**3i** obtained (crystal count number 12)



**D-2000 Elite HPLC System Manager Report**

Analyzed Date and Time: 06/29/2016  
05:47 PM

Reported Date and Time: 07/01/2016  
12:13 PM

Processed Date and Time: 07/01/2016  
12:12 PM

Data Path: D:\Arun\DATA\0505\

Processing Method: test-THF/Hx-Final II

System (acquisition): Sys 1

Series: 0505

Application(data): Arun

Vial Number: 4

Sample Name: CHP-8g-F2 (Crys 4)

Vial Type: UNK

Injection from this vial: 1 of 1

Volume: 20.0 ul

Sample Description: 25%THF+HX 1.0 mL/MIN COL-IC

Chrom Type: Fixed WL Chromatogram, 254 nm

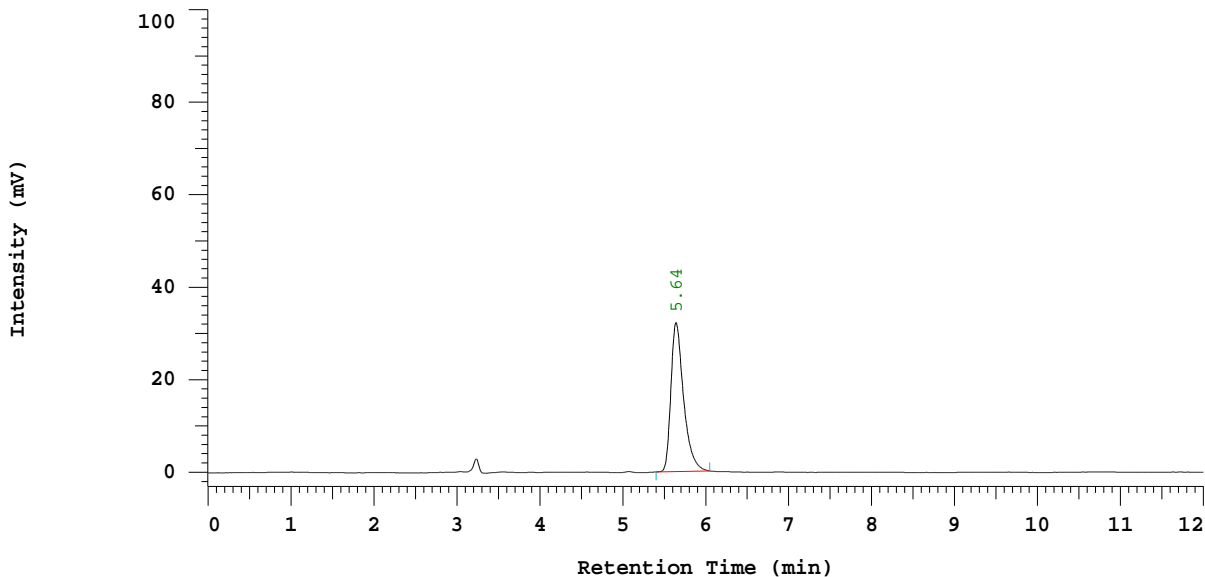

Processing Method: test-THF/Hx-Final II

Column Type: IC

Method Developer: ARUN

Method Description:

Chrom Type: Fixed WL Chromatogram, 254 nm

Peak Quantitation: AREA

Calculation Method: EXT-STD

Scale Factor 1: 1.000

| No. | RT   | Area   | Height | Area %  |
|-----|------|--------|--------|---------|
| 1   | 5.64 | 341129 | 32185  | 100.000 |
|     |      | 341129 | 32185  | 100.000 |

Peak rejection level: 5000

Fig S165. HPLC analysis of a crystal of the (+)-**3i** obtained (crystal count number 13)

**D-2000 Elite HPLC System Manager Report**Analyzed Date and Time: 06/30/2016  
04:59 PMReported Date and Time: 07/01/2016  
11:58 AMProcessed Date and Time: 07/01/2016  
11:57 AM

Data Path: D:\Arun\DATA\0515\

Processing Method: test-THF/Hx-Final II

System (acquisition): Sys 1

Series: 0515

Application(data): Arun

Vial Number: 1

Sample Name: CHP-8g-F2 (Crys 1)

Vial Type: UNK

Injection from this vial: 1 of 1

Volume: 20.0 ul

Sample Description: 25%THF+HX 1.0 mL/MIN COL-IC

Chrom Type: Fixed WL Chromatogram, 254 nm

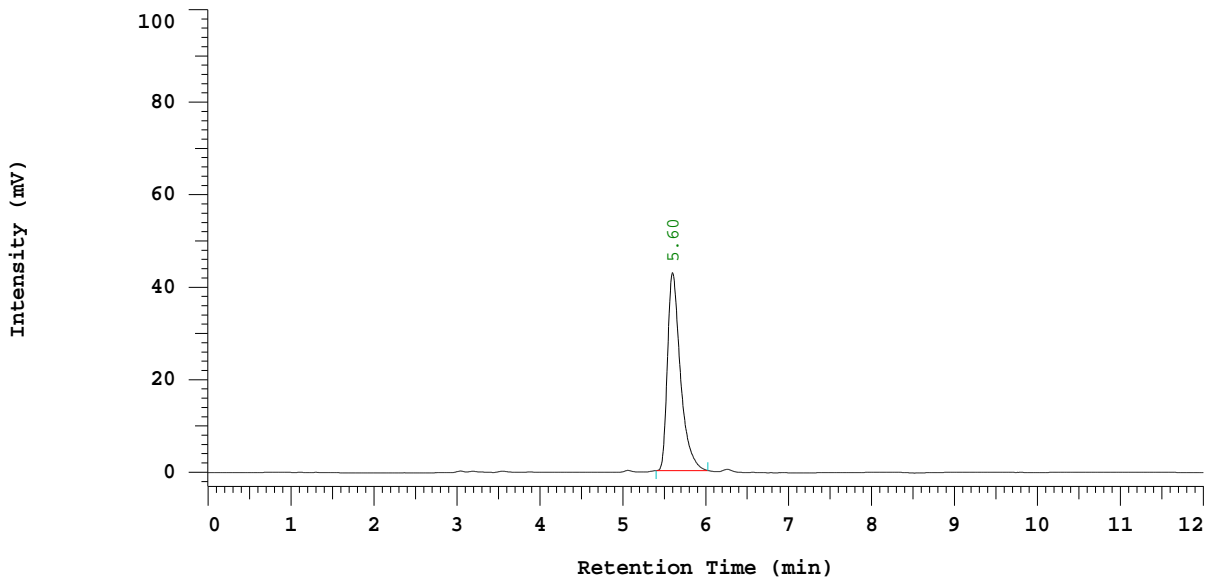

Processing Method: test-THF/Hx-Final II

Column Type: IC

Method Developer: ARUN

Method Description:

Chrom Type: Fixed WL Chromatogram, 254 nm

Peak Quantitation: AREA

Calculation Method: EXT-STD

Scale Factor 1: 1.000

| No. | RT   | Area   | Height | Area %  |
|-----|------|--------|--------|---------|
| 1   | 5.60 | 463194 | 42825  | 100.000 |
|     |      | 463194 | 42825  | 100.000 |

Peak rejection level: 5000

Fig S166. HPLC analysis of a crystal of the (+)-**3i** obtained (crystal count number 14)

**D-2000 Elite HPLC System Manager Report**Analyzed Date and Time: 06/30/2016  
05:12 PMReported Date and Time: 07/01/2016  
11:56 AMProcessed Date and Time: 07/01/2016  
11:55 AM

Data Path: D:\Arun\DATA\0516\

Processing Method: test-THF/Hx-Final II

System (acquisition): Sys 1

Series: 0516

Application(data): Arun

Vial Number: 2

Sample Name: CHP-8g-F2 (Crys 2)

Vial Type: UNK

Injection from this vial: 1 of 1

Volume: 20.0 ul

Sample Description: 25%THF+HX 1.0 mL/MIN COL-IC

Chrom Type: Fixed WL Chromatogram, 254 nm

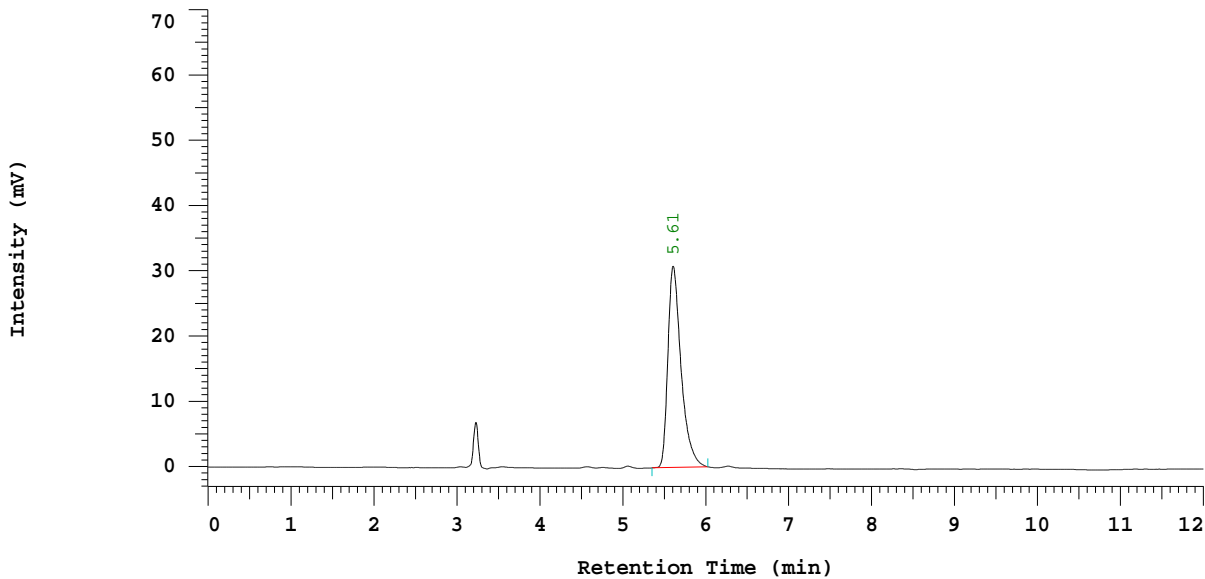

Processing Method: test-THF/Hx-Final II

Column Type: IC

Method Developer: ARUN

Method Description:

Chrom Type: Fixed WL Chromatogram, 254 nm

Peak Quantitation: AREA

Calculation Method: EXT-STD

Scale Factor 1: 1.000

| No. | RT   | Area   | Height | Area %  |
|-----|------|--------|--------|---------|
| 1   | 5.61 | 340930 | 30841  | 100.000 |
|     |      | 340930 | 30841  | 100.000 |

Peak rejection level: 5000

Fig S167. HPLC analysis of a crystal of the (+)-**3i** obtained (crystal count number 15)

**D-2000 Elite HPLC System Manager Report**Analyzed Date and Time: 06/30/2016  
05:50 PMReported Date and Time: 07/01/2016  
11:49 AMProcessed Date and Time: 07/01/2016  
11:49 AM

Data Path: D:\Arun\DATA\0519\

Processing Method: test-THF/Hx-Final II

System (acquisition): Sys 1

Series: 0519

Application(data): Arun

Vial Number: 5

Sample Name: CHP-8g-F2 (Crys 5)

Vial Type: UNK

Injection from this vial: 1 of 1

Volume: 20.0 ul

Sample Description: 25%THF+HX 1.0 mL/MIN COL-IC

Chrom Type: Fixed WL Chromatogram, 254 nm

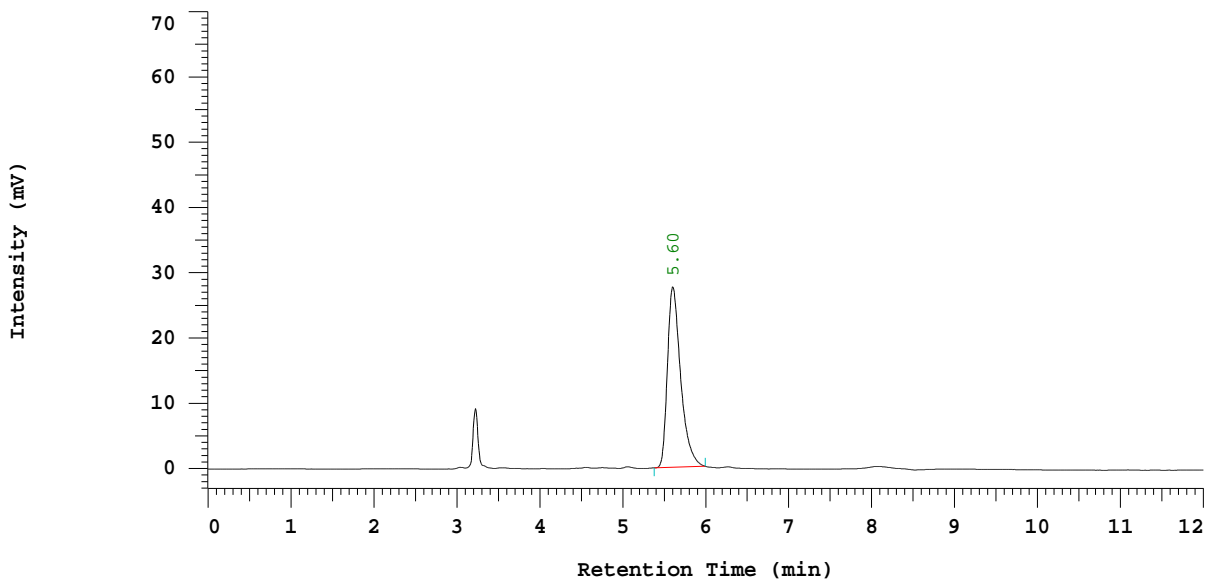

Processing Method: test-THF/Hx-Final II

Column Type: IC

Method Developer: ARUN

Method Description:

Chrom Type: Fixed WL Chromatogram, 254 nm

Peak Quantitation: AREA

Calculation Method: EXT-STD

Scale Factor 1: 1.000

| No. | RT   | Area   | Height | Area %  |
|-----|------|--------|--------|---------|
| 1   | 5.60 | 306252 | 27617  | 100.000 |
|     |      | 306252 | 27617  | 100.000 |

Peak rejection level: 5000

Fig S168. HPLC analysis of a crystal of the (+)-**3i** obtained (crystal count number 16)

**D-2000 Elite HPLC System Manager Report**Analyzed Date and Time: 06/23/2016  
05:39 PMReported Date and Time: 07/01/2016  
01:14 PMProcessed Date and Time: 07/01/2016  
01:14 PM

Data Path: D:\Arun\DATA\0468\

Processing Method: test-THF/Hx-Final II

System (acquisition): Sys 1

Series: 0468

Application(data): Arun

Vial Number: 1

Sample Name: CHP-8g-F2 (Crystal 2)

Vial Type: UNK

Injection from this vial: 1 of 1

Volume: 20.0 ul

Sample Description: 25%THF+HX 1.0 mL/MIN COL-IC

Chrom Type: Fixed WL Chromatogram, 254 nm

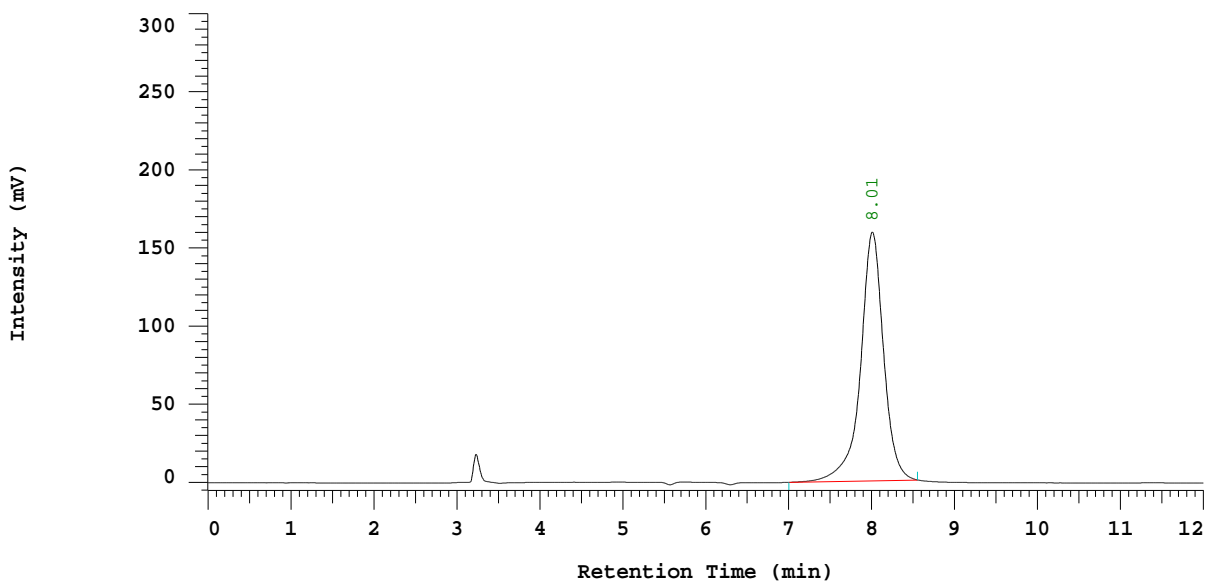

Processing Method: test-THF/Hx-Final II

Column Type: IC

Method Developer: ARUN

Method Description:

Chrom Type: Fixed WL Chromatogram, 254 nm

Peak Quantitation: AREA

Calculation Method: EXT-STD

Scale Factor 1: 1.000

| No. | RT   | Area    | Height | Area %  |
|-----|------|---------|--------|---------|
| 1   | 8.01 | 3072195 | 159115 | 100.000 |
|     |      | 3072195 | 159115 | 100.000 |

Peak rejection level: 5000

Fig S169. HPLC analysis of a crystal of the (–)-**3i** obtained (crystal count number 1)

**D-2000 Elite HPLC System Manager Report**Analyzed Date and Time: 06/23/2016  
09:15 PMReported Date and Time: 07/01/2016  
01:09 PMProcessed Date and Time: 07/01/2016  
01:09 PM

Data Path: D:\Arun\DATA\0472\

Processing Method: test-THF/Hx-Final II

System (acquisition): Sys 1

Series: 0472

Application(data): Arun

Vial Number: 1

Sample Name: CHP-8g-F2 (Crystal 5)

Vial Type: UNK

Injection from this vial: 1 of 1

Volume: 20.0 ul

Sample Description: 25%THF+HX 1.0 mL/MIN COL-IC

Chrom Type: Fixed WL Chromatogram, 254 nm

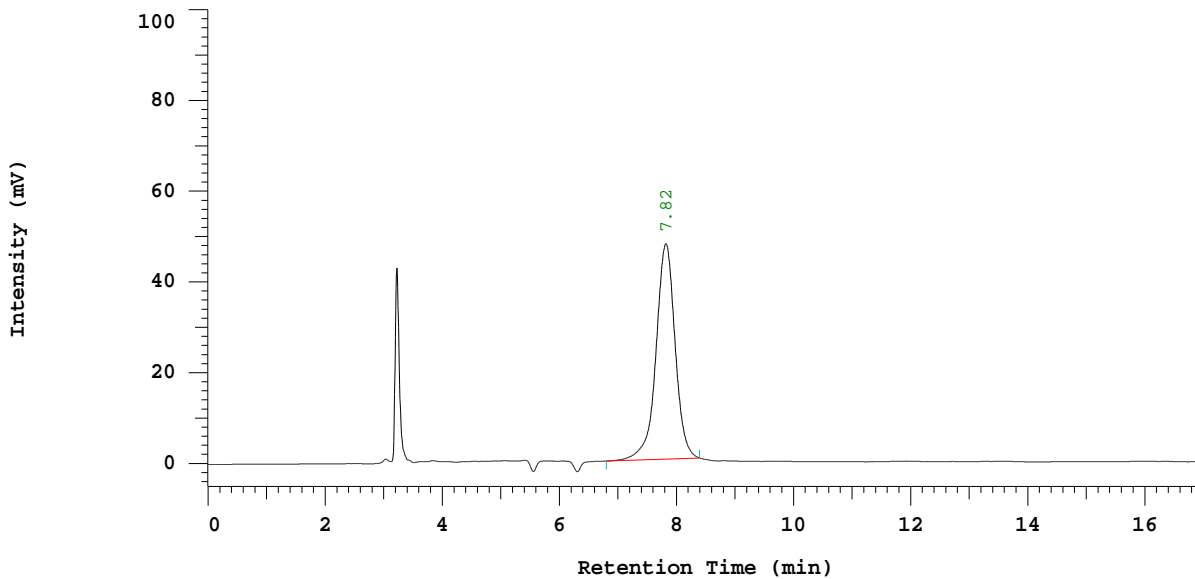

Processing Method: test-THF/Hx-Final II

Column Type: IC

Method Developer: ARUN

Method Description:

Chrom Type: Fixed WL Chromatogram, 254 nm

Peak Quantitation: AREA

Calculation Method: EXT-STD

Scale Factor 1: 1.000

| No. | RT   | Area    | Height | Area %  |
|-----|------|---------|--------|---------|
| 1   | 7.82 | 1075182 | 47439  | 100.000 |
|     |      | 1075182 | 47439  | 100.000 |

Peak rejection level: 5000

Fig S170. HPLC analysis of a crystal of the (-)-**3i** obtained (crystal count number 2)

**D-2000 Elite HPLC System Manager Report**Analyzed Date and Time: 06/24/2016  
12:35 PMReported Date and Time: 07/01/2016  
01:06 PMProcessed Date and Time: 07/01/2016  
01:06 PM

Data Path: D:\Arun\DATA\0475\

Processing Method: test-THF/Hx-Final II

System (acquisition): Sys 1

Series: 0475

Application(data): Arun

Vial Number: 2

Sample Name: CHP-8g-F2 (Crys 2)

Vial Type: UNK

Injection from this vial: 1 of 1

Volume: 20.0 ul

Sample Description: 25%THF+HX 1.0 mL/MIN COL-IC

Chrom Type: Fixed WL Chromatogram, 254 nm

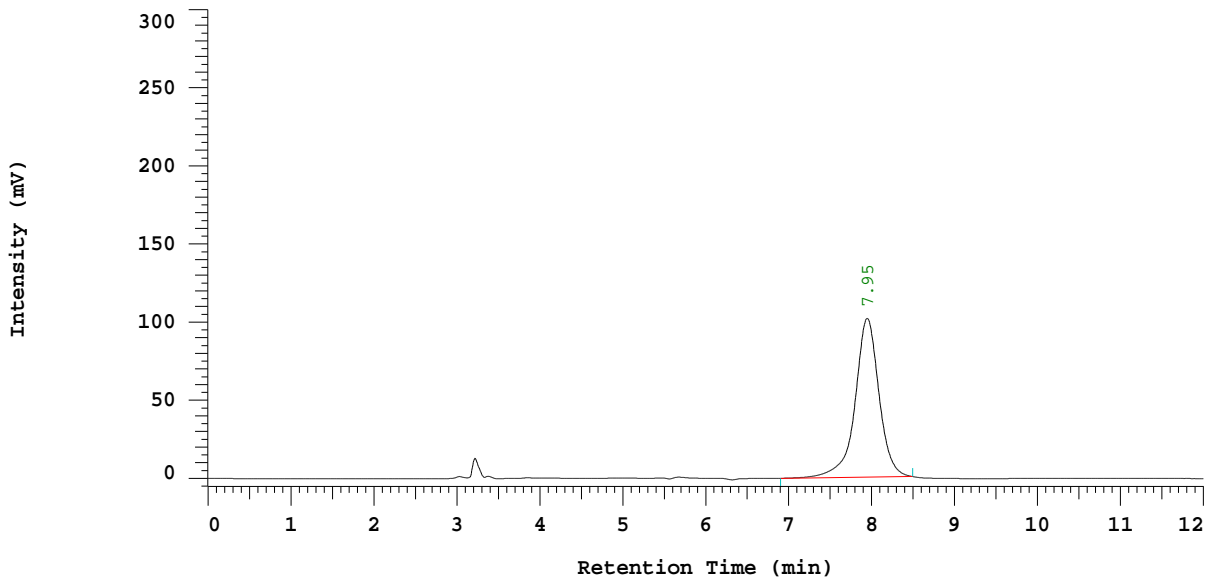

Processing Method: test-THF/Hx-Final II

Column Type: IC

Method Developer: ARUN

Method Description:

Chrom Type: Fixed WL Chromatogram, 254 nm

Peak Quantitation: AREA

Calculation Method: EXT-STD

Scale Factor 1: 1.000

| No. | RT   | Area    | Height | Area %  |
|-----|------|---------|--------|---------|
| 1   | 7.95 | 2042287 | 101574 | 100.000 |
|     |      | 2042287 | 101574 | 100.000 |

Peak rejection level: 5000

Fig S171. HPLC analysis of a crystal of the (–)-**3i** obtained (crystal count number 3)

**D-2000 Elite HPLC System Manager Report**Analyzed Date and Time: 06/27/2016  
04:31 PMReported Date and Time: 07/01/2016  
12:43 PMProcessed Date and Time: 07/01/2016  
12:42 PM

Data Path: D:\Arun\DATA\0487\

Processing Method: test-THF/Hx-Final II

System (acquisition): Sys 1

Series: 0487

Application(data): Arun

Vial Number: 3

Sample Name: CHP-8g-F2 (Crys 3)

Vial Type: UNK

Injection from this vial: 1 of 1

Volume: 20.0 ul

Sample Description: 25%THF+HX 1.0 mL/MIN COL-IC

Chrom Type: Fixed WL Chromatogram, 254 nm

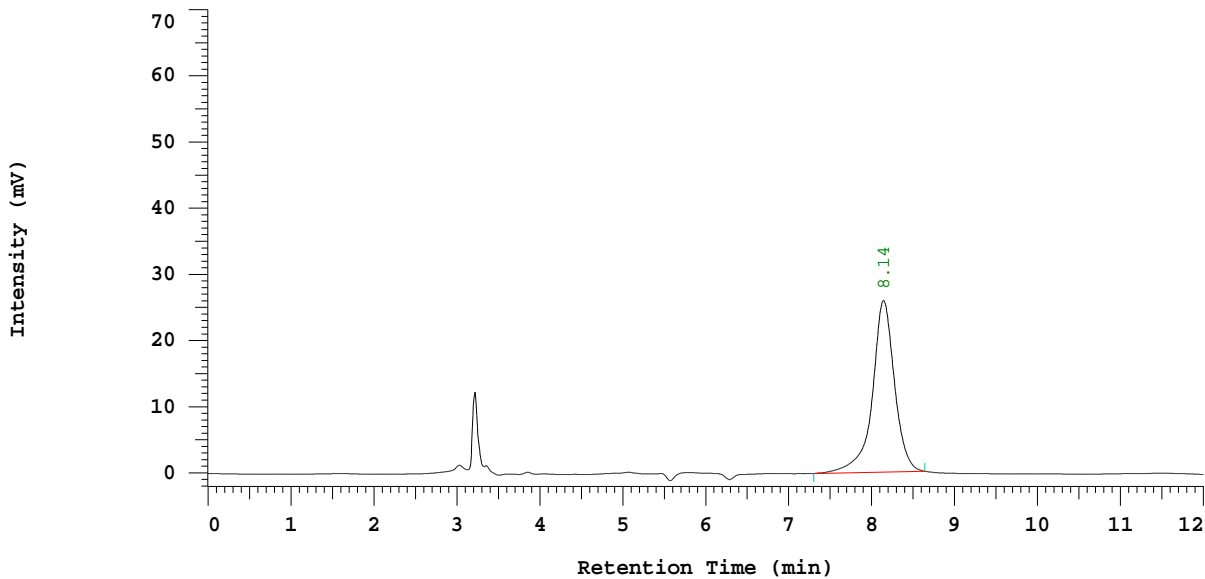

Processing Method: test-THF/Hx-Final II

Column Type: IC

Method Developer: ARUN

Method Description:

Chrom Type: Fixed WL Chromatogram, 254 nm

Peak Quantitation: AREA

Calculation Method: EXT-STD

Scale Factor 1: 1.000

| No. | RT   | Area   | Height | Area %  |
|-----|------|--------|--------|---------|
| 1   | 8.14 | 481174 | 25906  | 100.000 |
|     |      | 481174 | 25906  | 100.000 |

Peak rejection level: 5000

Fig S172. HPLC analysis of a crystal of the (-)-**3i** obtained (crystal count number 4)



### D-2000 Elite HPLC System Manager Report

Analyzed Date and Time: 06/27/2016  
04:44 PM

Reported Date and Time: 07/01/2016  
12:41 PM

Processed Date and Time: 07/01/2016  
12:41 PM

Data Path: D:\Arun\DATA\0488\

Processing Method: test-THF/Hx-Final II

System (acquisition): Sys 1

Series: 0488

Application(data): Arun

Vial Number: 4

Sample Name: CHP-8g-F2 (Crys 4)

Vial Type: UNK

Injection from this vial: 1 of 1

Volume: 20.0 ul

Sample Description: 25%THF+HX 1.0 mL/MIN COL-IC

Chrom Type: Fixed WL Chromatogram, 254 nm

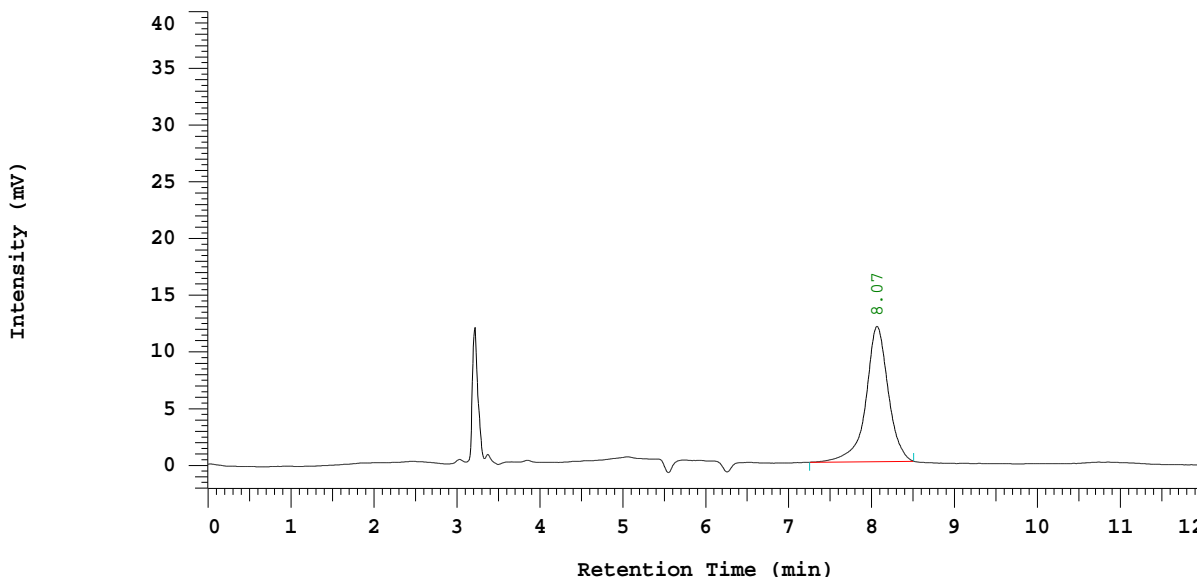

Processing Method: test-THF/Hx-Final II

Column Type: IC

Method Developer: ARUN

Method Description:

Chrom Type: Fixed WL Chromatogram, 254 nm

Peak Quantitation: AREA

Calculation Method: EXT-STD

Scale Factor 1: 1.000

| No. | RT   | Area   | Height | Area %  |
|-----|------|--------|--------|---------|
| 1   | 8.07 | 222480 | 11916  | 100.000 |
|     |      | 222480 | 11916  | 100.000 |

Peak rejection level: 5000

Fig S173. HPLC analysis of a crystal of the (-)-3i obtained (crystal count number 5)

**D-2000 Elite HPLC System Manager Report**Analyzed Date and Time: 06/27/2016  
05:35 PMReported Date and Time: 07/01/2016  
12:35 PMProcessed Date and Time: 07/01/2016  
12:35 PM

Data Path: D:\Arun\DATA\0491\

Processing Method: test-THF/Hx-Final II

System (acquisition): Sys 1

Series: 0491

Application(data): Arun

Vial Number: 2

Sample Name: CHP-8g-F2 (Crys 2)

Vial Type: UNK

Injection from this vial: 1 of 1

Volume: 20.0 ul

Sample Description: 25%THF+HX 1.0 mL/MIN COL-IC

Chrom Type: Fixed WL Chromatogram, 254 nm

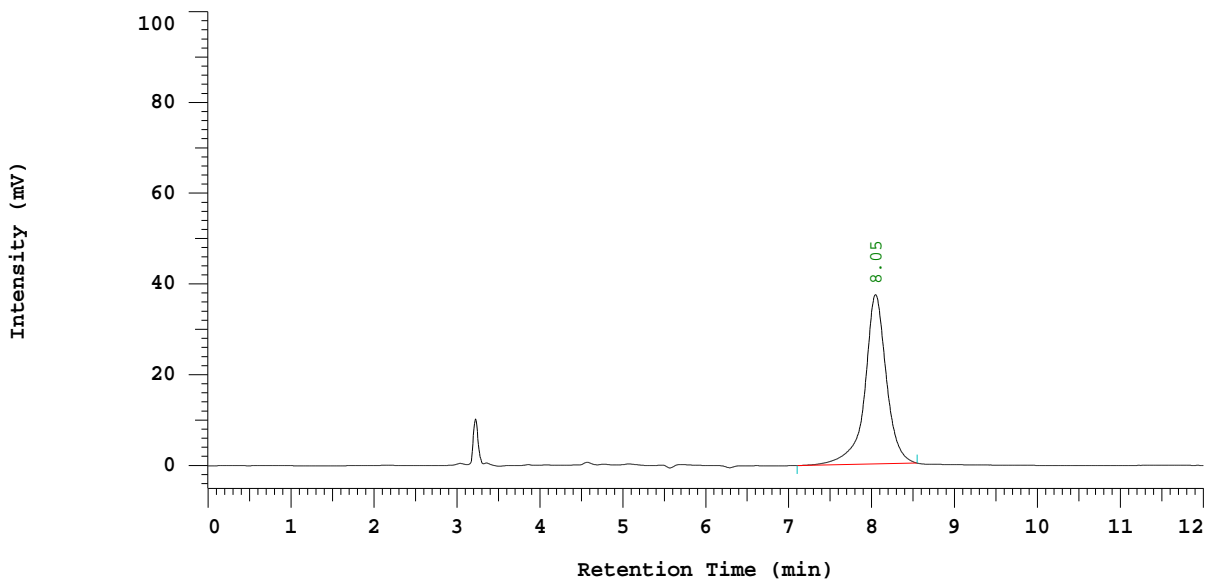

Processing Method: test-THF/Hx-Final II

Column Type: IC

Method Developer: ARUN

Method Description:

Chrom Type: Fixed WL Chromatogram, 254 nm

Peak Quantitation: AREA

Calculation Method: EXT-STD

Scale Factor 1: 1.000

| No. | RT   | Area   | Height | Area %  |
|-----|------|--------|--------|---------|
| 1   | 8.05 | 672817 | 37319  | 100.000 |
|     |      | 672817 | 37319  | 100.000 |

Peak rejection level: 5000

Fig S174. HPLC analysis of a crystal of the (–)-**3i** obtained (crystal count number 6)

### D-2000 Elite HPLC System Manager Report

Analyzed Date and Time: 06/29/2016  
04:14 PM

Reported Date and Time: 07/01/2016  
12:25 PM

Processed Date and Time: 07/01/2016  
12:25 PM

Data Path: D:\Arun\DATA\0498\

Processing Method: test-THF/Hx-Final II

System (acquisition): Sys 1

Series: 0498

Application(data): Arun

Vial Number: 2

Sample Name: CHP-8g-F2 (Crys 2)

Vial Type: UNK

Injection from this vial: 1 of 1

Volume: 20.0 ul

Sample Description: 25%THF+HX 1.0 mL/MIN COL-IC

Chrom Type: Fixed WL Chromatogram, 254 nm

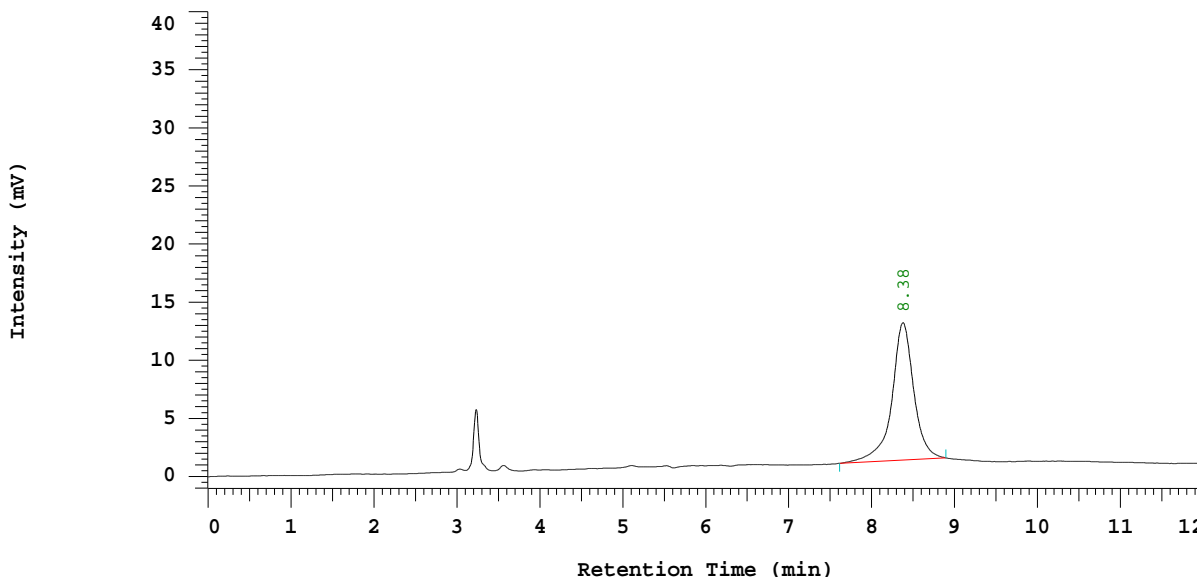

Processing Method: test-THF/Hx-Final II

Column Type: IC

Method Developer: ARUN

Method Description:

Chrom Type: Fixed WL Chromatogram, 254 nm

Peak Quantitation: AREA

Calculation Method: EXT-STD

Scale Factor 1: 1.000

| No. | RT   | Area   | Height | Area %  |
|-----|------|--------|--------|---------|
| 1   | 8.38 | 217094 | 11818  | 100.000 |
|     |      | 217094 | 11818  | 100.000 |

Peak rejection level: 5000

Fig S175. HPLC analysis of a crystal of the (-)-3i obtained (crystal count number 7)

**D-2000 Elite HPLC System Manager Report**

Analyzed Date and Time: 06/29/2016  
04:53 PM

Reported Date and Time: 07/01/2016  
12:21 PM

Processed Date and Time: 07/01/2016  
12:20 PM

Data Path: D:\Arun\DATA\0501\

Processing Method: test-THF/Hx-Final II

System (acquisition): Sys 1

Series: 0501

Application(data): Arun

Vial Number: 5

Sample Name: CHP-8g-F2 (Crys 5)

Vial Type: UNK

Injection from this vial: 1 of 1

Volume: 20.0 ul

Sample Description: 25%THF+HX 1.0 mL/MIN COL-IC

Chrom Type: Fixed WL Chromatogram, 254 nm

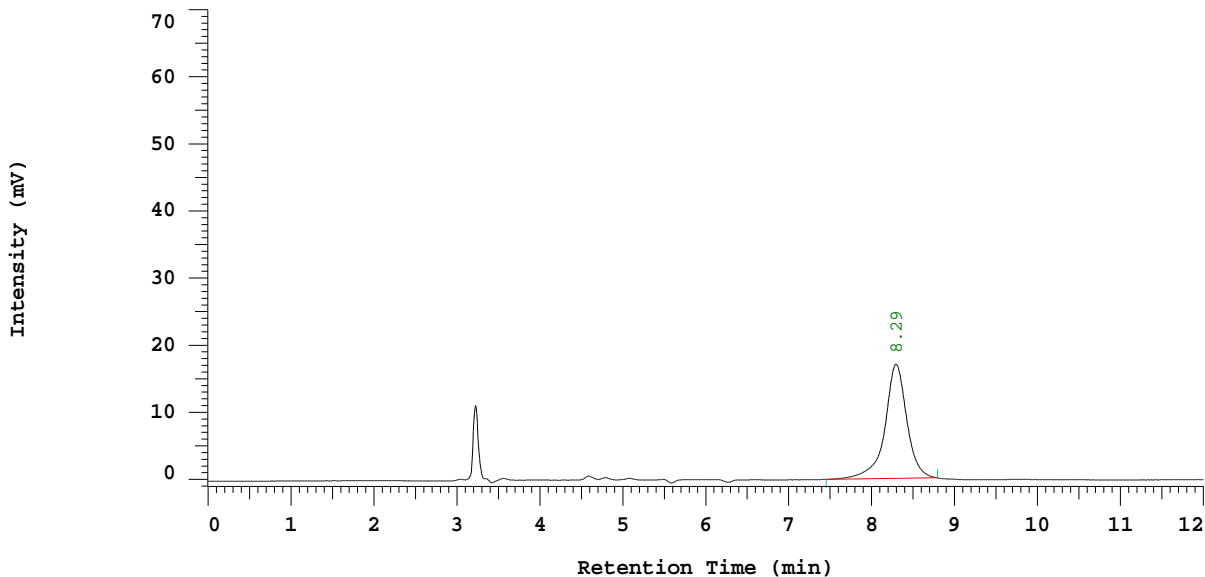

Processing Method: test-THF/Hx-Final II

Column Type: IC

Method Developer: ARUN

Method Description:

Chrom Type: Fixed WL Chromatogram, 254 nm

Peak Quantitation: AREA

Calculation Method: EXT-STD

Scale Factor 1: 1.000

| No. | RT   | Area   | Height | Area %  |
|-----|------|--------|--------|---------|
| 1   | 8.29 | 313751 | 17026  | 100.000 |
|     |      | 313751 | 17026  | 100.000 |

Peak rejection level: 5000

Fig S176. HPLC analysis of a crystal of the (-)-**3i** obtained (crystal count number 8)

**D-2000 Elite HPLC System Manager Report**Analyzed Date and Time: 06/29/2016  
05:59 PMReported Date and Time: 07/01/2016  
12:11 PMProcessed Date and Time: 07/01/2016  
12:11 PM

Data Path: D:\Arun\DATA\0506\

Processing Method: test-THF/Hx-Final II

System (acquisition): Sys 1

Series: 0506

Application(data): Arun

Vial Number: 5

Sample Name: CHP-8g-F2 (Crys 5)

Vial Type: UNK

Injection from this vial: 1 of 1

Volume: 20.0 ul

Sample Description: 25%THF+HX 1.0 mL/MIN COL-IC

Chrom Type: Fixed WL Chromatogram, 254 nm

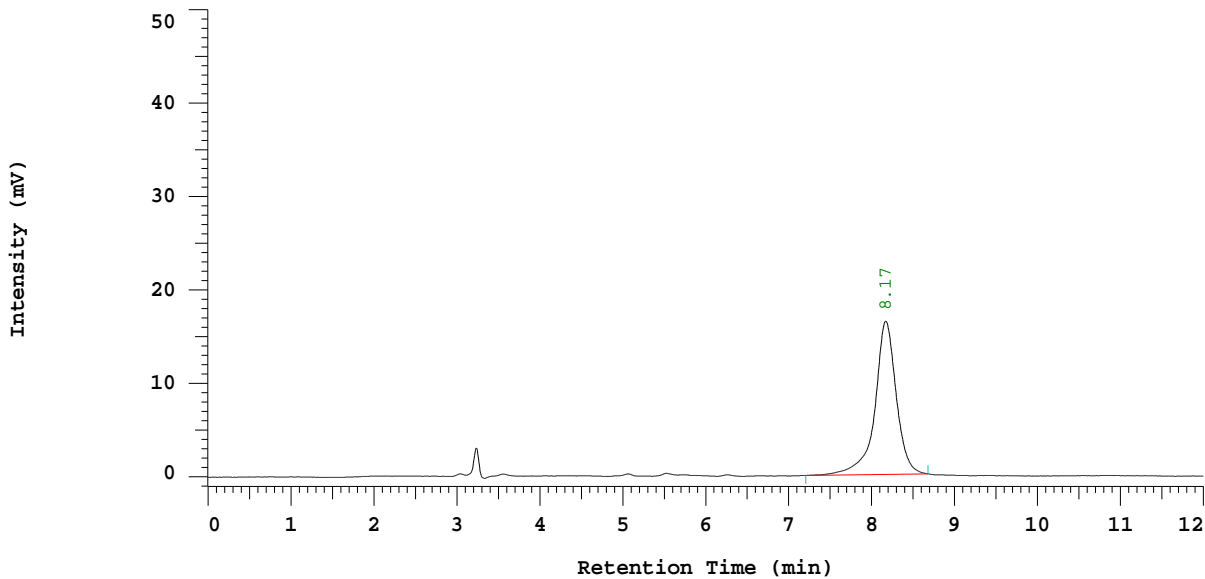

Processing Method: test-THF/Hx-Final II

Column Type: IC

Method Developer: ARUN

Method Description:

Chrom Type: Fixed WL Chromatogram, 254 nm

Peak Quantitation: AREA

Calculation Method: EXT-STD

Scale Factor 1: 1.000

| No. | RT   | Area   | Height | Area %  |
|-----|------|--------|--------|---------|
| 1   | 8.17 | 293692 | 16396  | 100.000 |
|     |      | 293692 | 16396  | 100.000 |

Peak rejection level: 5000

Fig S177. HPLC analysis of a crystal of the (–)-**3i** obtained (crystal count number 9)

**D-2000 Elite HPLC System Manager Report**Analyzed Date and Time: 06/30/2016  
03:38 PMReported Date and Time: 07/01/2016  
12:09 PMProcessed Date and Time: 07/01/2016  
12:09 PM

Data Path: D:\Arun\DATA\0509\

Processing Method: test-THF/Hx-Final II

System (acquisition): Sys 1

Series: 0509

Application(data): Arun

Vial Number: 1

Sample Name: CHP-8g-F2 (Crys 1)

Vial Type: UNK

Injection from this vial: 1 of 1

Volume: 20.0 ul

Sample Description: 25%THF+HX 1.0 mL/MIN COL-IC

Chrom Type: Fixed WL Chromatogram, 254 nm

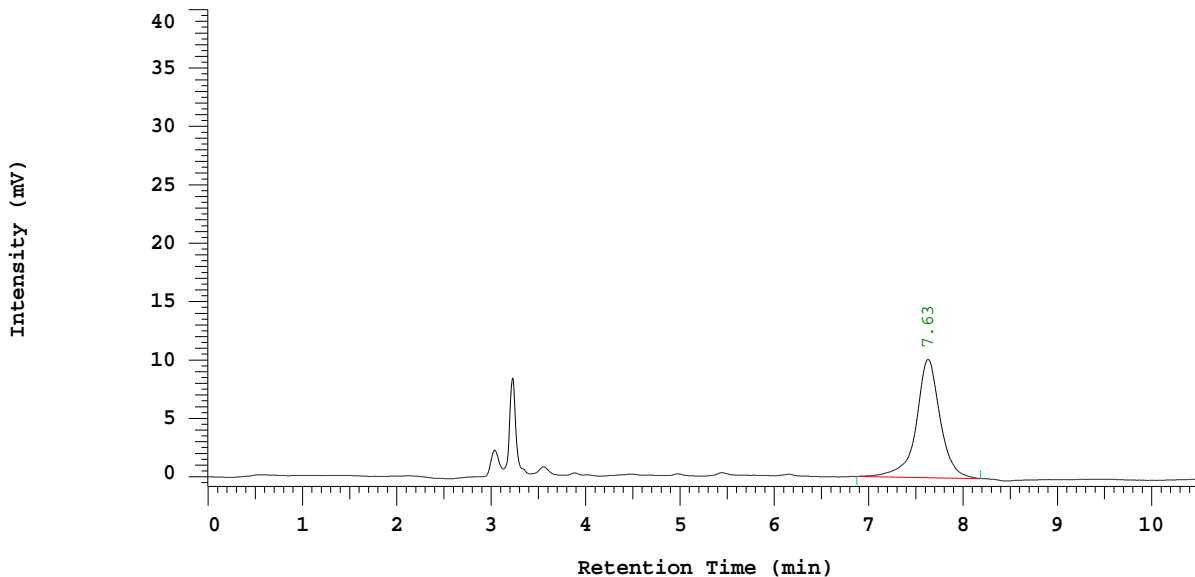

Processing Method: test-THF/Hx-Final II

Column Type: IC

Method Developer: ARUN

Method Description:

Chrom Type: Fixed WL Chromatogram, 254 nm

Peak Quantitation: AREA

Calculation Method: EXT-STD

Scale Factor 1: 1.000

| No. | RT   | Area   | Height | Area %  |
|-----|------|--------|--------|---------|
| 1   | 7.63 | 178613 | 10137  | 100.000 |
|     |      | 178613 | 10137  | 100.000 |

Peak rejection level: 5000

Fig S178. HPLC analysis of a crystal of the (-)-**3i** obtained (crystal count number 10)

**D-2000 Elite HPLC System Manager Report**Analyzed Date and Time: 06/30/2016  
03:50 PMReported Date and Time: 07/01/2016  
12:07 PMProcessed Date and Time: 07/01/2016  
12:07 PM

Data Path: D:\Arun\DATA\0510\

Processing Method: test-THF/Hx-Final II

System (acquisition): Sys 1

Series: 0510

Application(data): Arun

Vial Number: 1

Sample Name: CHP-8g-F2 (Crys 1)

Vial Type: UNK

Injection from this vial: 1 of 1

Volume: 20.0 ul

Sample Description: 25%THF+HX 1.0 mL/MIN COL-IC

Chrom Type: Fixed WL Chromatogram, 254 nm

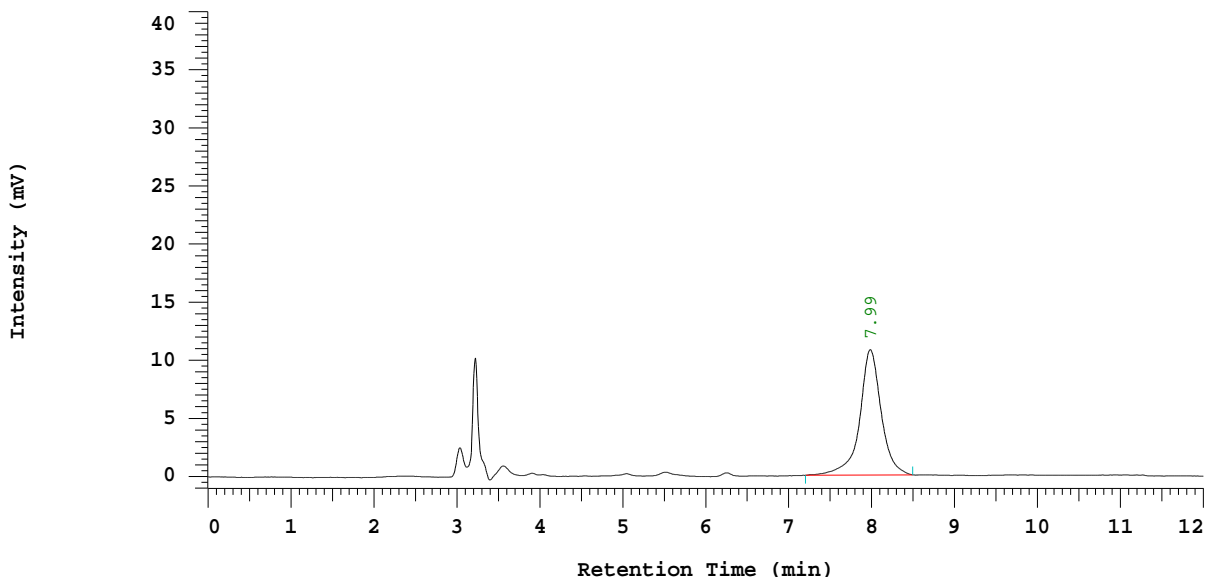

Processing Method: test-THF/Hx-Final II

Column Type: IC

Method Developer: ARUN

Method Description:

Chrom Type: Fixed WL Chromatogram, 254 nm

Peak Quantitation: AREA

Calculation Method: EXT-STD

Scale Factor 1: 1.000

| No. | RT   | Area   | Height | Area %  |
|-----|------|--------|--------|---------|
| 1   | 7.99 | 194411 | 10775  | 100.000 |
|     |      | 194411 | 10775  | 100.000 |

Peak rejection level: 5000

Fig S179. HPLC analysis of a crystal of the (–)-**3i** obtained (crystal count number 11)

### D-2000 Elite HPLC System Manager Report

Analyzed Date and Time: 06/30/2016  
04:03 PM

Reported Date and Time: 07/01/2016  
12:05 PM

Processed Date and Time: 07/01/2016  
12:05 PM

Data Path: D:\Arun\DATA\0511\

Processing Method: test-THF/Hx-Final II

System (acquisition): Sys 1

Series: 0511

Application(data): Arun

Vial Number: 2

Sample Name: CHP-8g-F2 (Crys 2)

Vial Type: UNK

Injection from this vial: 1 of 1

Volume: 20.0 ul

Sample Description: 25%THF+HX 1.0 mL/MIN COL-IC

Chrom Type: Fixed WL Chromatogram, 254 nm

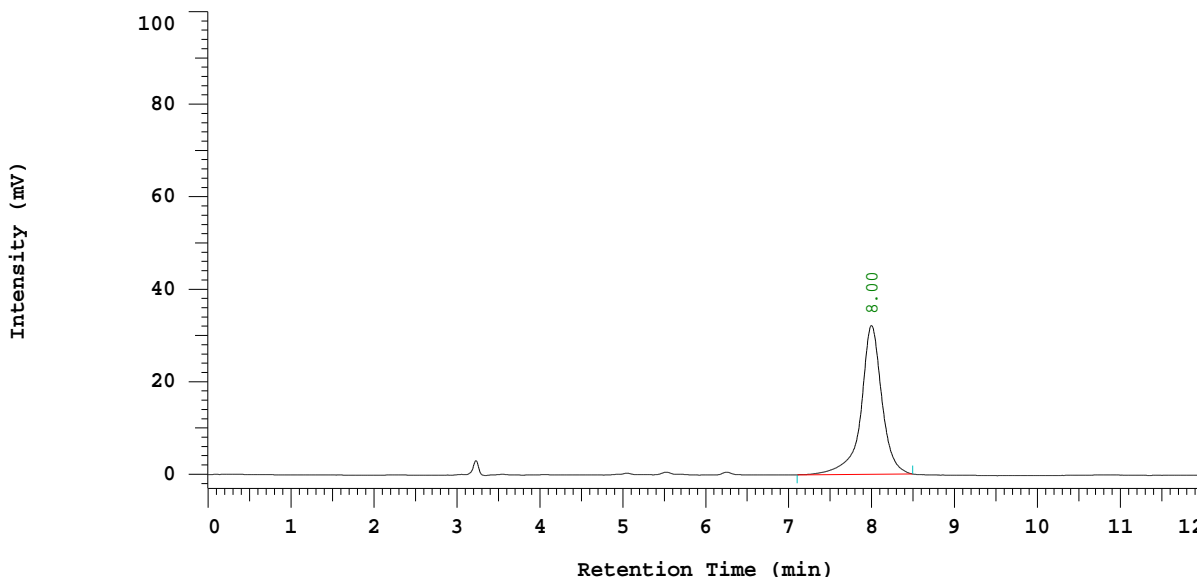

Processing Method: test-THF/Hx-Final II

Column Type: IC

Method Developer: ARUN

Method Description:

Chrom Type: Fixed WL Chromatogram, 254 nm

Peak Quantitation: AREA

Calculation Method: EXT-STD

Scale Factor 1: 1.000

| No. | RT   | Area   | Height | Area %  |
|-----|------|--------|--------|---------|
| 1   | 8.00 | 563043 | 32162  | 100.000 |
|     |      | 563043 | 32162  | 100.000 |

Peak rejection level: 5000

Fig S180. HPLC analysis of a crystal of the (-)-**3i** obtained (crystal count number 12)



**D-2000 Elite HPLC System Manager Report**Analyzed Date and Time: 06/30/2016  
04:16 PMReported Date and Time: 07/01/2016  
12:04 PMProcessed Date and Time: 07/01/2016  
12:03 PM

Data Path: D:\Arun\DATA\0512\

Processing Method: test-THF/Hx-Final II

System (acquisition): Sys 1

Series: 0512

Application(data): Arun

Vial Number: 3

Sample Name: CHP-8g-F2 (Crys 3)

Vial Type: UNK

Injection from this vial: 1 of 1

Volume: 20.0 ul

Sample Description: 25%THF+HX 1.0 mL/MIN COL-IC

Chrom Type: Fixed WL Chromatogram, 254 nm

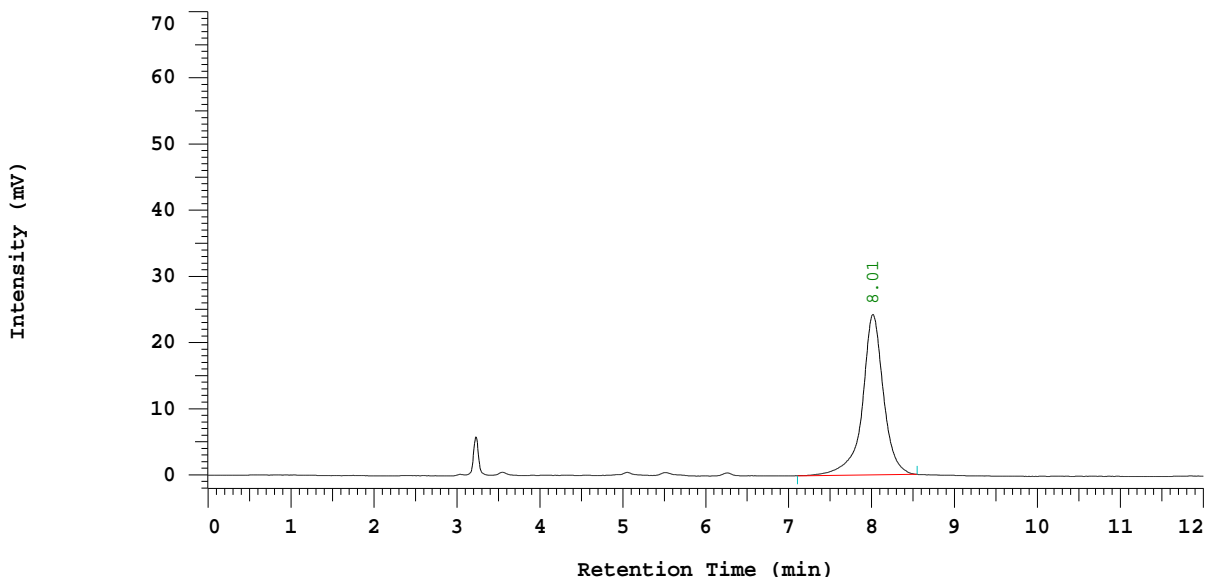

Processing Method: test-THF/Hx-Final II

Column Type: IC

Method Developer: ARUN

Method Description:

Chrom Type: Fixed WL Chromatogram, 254 nm

Peak Quantitation: AREA

Calculation Method: EXT-STD

Scale Factor 1: 1.000

| No. | RT   | Area   | Height | Area %  |
|-----|------|--------|--------|---------|
| 1   | 8.01 | 427998 | 24238  | 100.000 |
|     |      | 427998 | 24238  | 100.000 |

Peak rejection level: 5000

Fig S181. HPLC analysis of a crystal of the (–)-**3i** obtained (crystal count number 13)

**D-2000 Elite HPLC System Manager Report**Analyzed Date and Time: 06/30/2016  
05:24 PMReported Date and Time: 07/01/2016  
11:54 AMProcessed Date and Time: 07/01/2016  
11:53 AM

Data Path: D:\Arun\DATA\0517\

Processing Method: test-THF/Hx-Final II

System (acquisition): Sys 1

Series: 0517

Application(data): Arun

Vial Number: 3

Sample Name: CHP-8g-F2 (Crys 3)

Vial Type: UNK

Injection from this vial: 1 of 1

Volume: 20.0 ul

Sample Description: 25%THF+HX 1.0 mL/MIN COL-IC

Chrom Type: Fixed WL Chromatogram, 254 nm

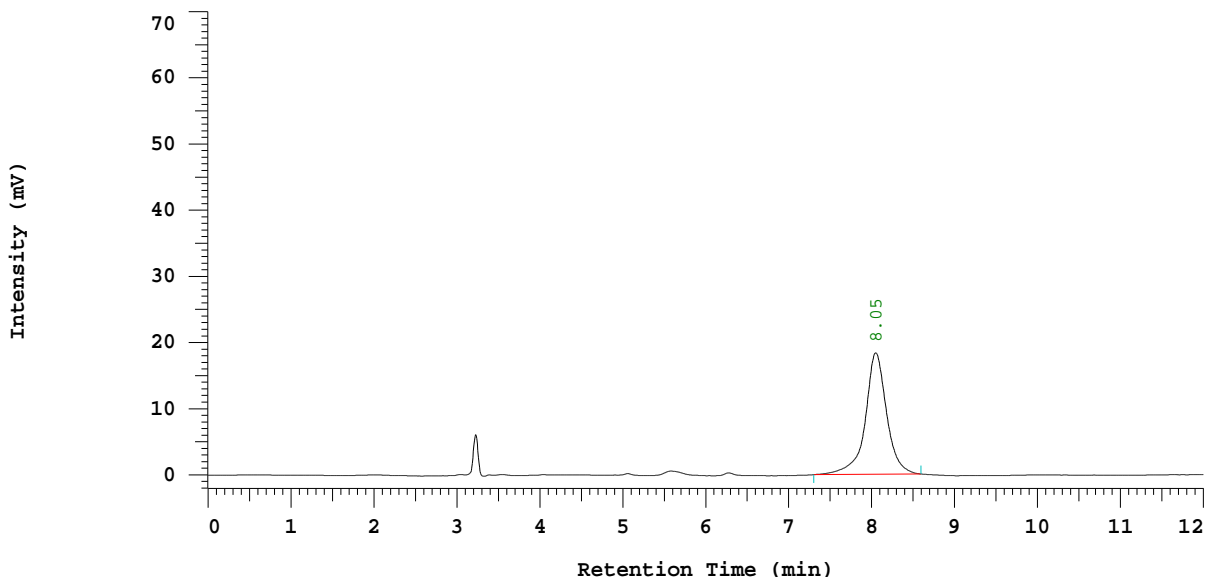

Processing Method: test-THF/Hx-Final II

Column Type: IC

Method Developer: ARUN

Method Description:

Chrom Type: Fixed WL Chromatogram, 254 nm

Peak Quantitation: AREA

Calculation Method: EXT-STD

Scale Factor 1: 1.000

| No. | RT   | Area   | Height | Area %  |
|-----|------|--------|--------|---------|
| 1   | 8.05 | 328706 | 18358  | 100.000 |
|     |      | 328706 | 18358  | 100.000 |

Peak rejection level: 5000

Fig S182. HPLC analysis of a crystal of the (–)-**3i** obtained (crystal count number 14)

**D-2000 Elite HPLC System Manager Report**Analyzed Date and Time: 07/04/2016  
08:13 PMReported Date and Time: 07/04/2016  
09:13 PMProcessed Date and Time: 07/04/2016  
09:12 PM

Data Path: D:\Arun\DATA\0523\

Processing Method: test-THF/Hx-Final II

System (acquisition): Sys 1

Series: 0523

Application(data): Arun

Vial Number: 1

Sample Name: CHP-8g-F2 (IC18028)

Vial Type: UNK

Injection from this vial: 1 of 1

Volume: 20.0 ul

Sample Description: 25%THF+HX 1.0 mL/MIN COL-IC

Chrom Type: Fixed WL Chromatogram, 254 nm

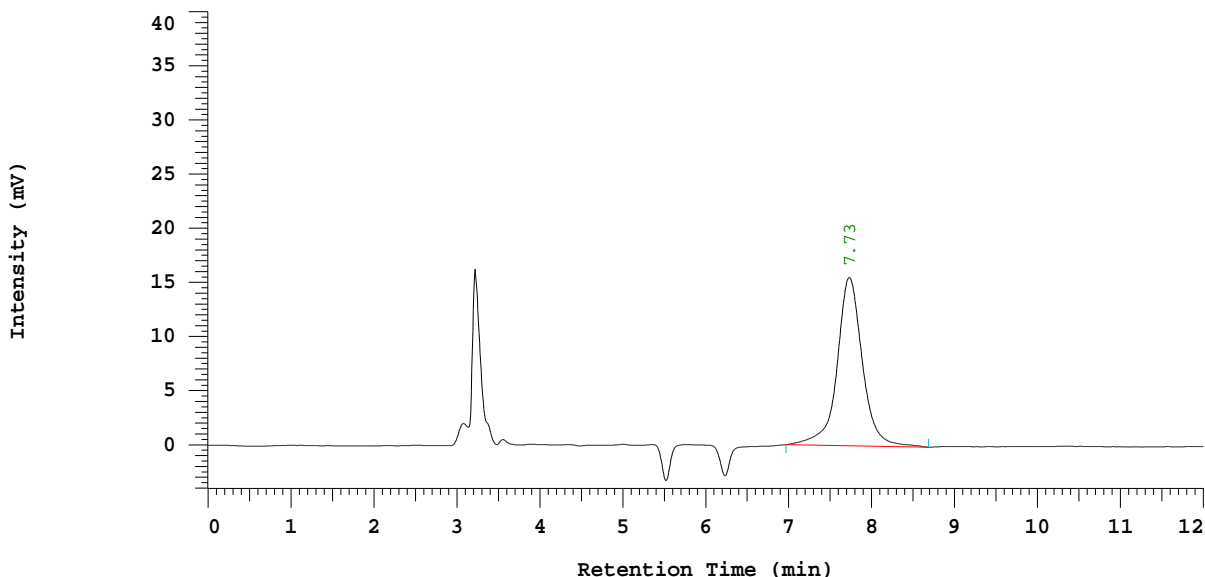

Processing Method: test-THF/Hx-Final II

Column Type: IC

Method Developer: ARUN

Method Description:

Chrom Type: Fixed WL Chromatogram, 254 nm

Peak Quantitation: AREA

Calculation Method: EXT-STD

Scale Factor 1: 1.000

| No. | RT   | Area   | Height | Area %  |
|-----|------|--------|--------|---------|
| 1   | 7.73 | 330698 | 15553  | 100.000 |
|     |      | 330698 | 15553  | 100.000 |

Peak rejection level: 5000

Fig S183. HPLC analysis of the crystal recovered from the X-ray analysis (IC18028, CCDC 1488798)

**D-2000 Elite HPLC System Manager Report**Analyzed Date and Time: 07/05/2016  
02:39 PMReported Date and Time: 07/05/2016  
03:00 PMProcessed Date and Time: 07/05/2016  
02:55 PM

Data Path: D:\Arun\DATA\0527\

Processing Method: test-THF/Hx-Final II

System (acquisition): Sys 1

Series: 0527

Application(data): Arun

Vial Number: 1

Sample Name: CHP-8g-F2 (IC18028-Co)

Vial Type: UNK

Injection from this vial: 1 of 1

Volume: 20.0 ul

Sample Description: 25%THF+HX 1.0 mL/MIN COL-IC

Chrom Type: Fixed WL Chromatogram, 254 nm

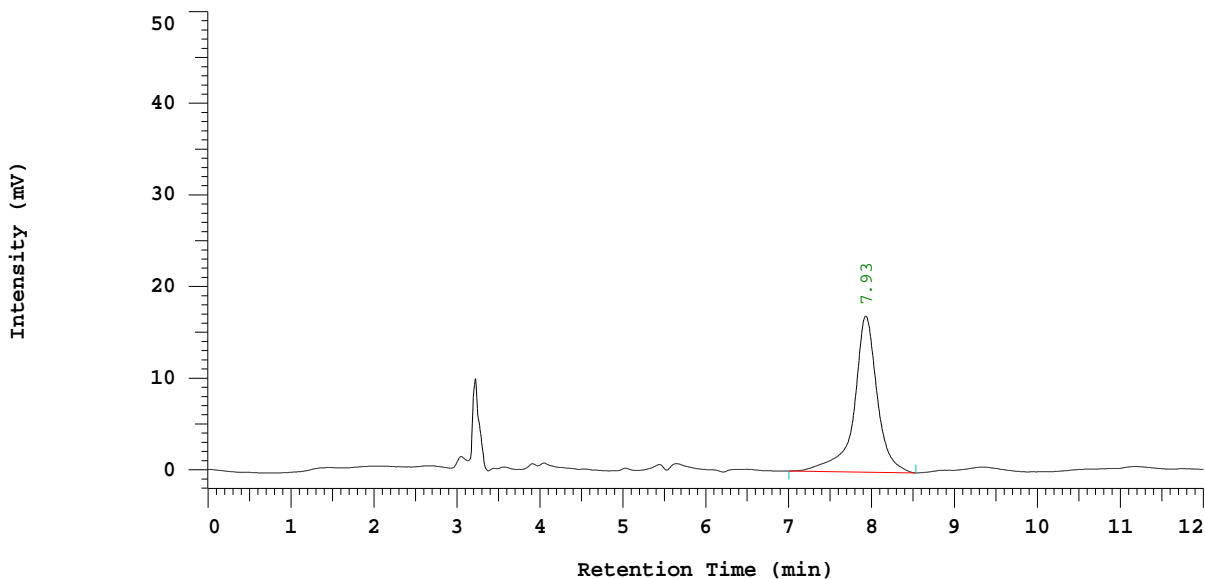

Processing Method: test-THF/Hx-Final II

Column Type: IC

Method Developer: ARUN

Method Description:

Chrom Type: Fixed WL Chromatogram, 254 nm

Peak Quantitation: AREA

Calculation Method: EXT-STD

Scale Factor 1: 1.000

| No. | RT   | Area   | Height | Area %  |
|-----|------|--------|--------|---------|
| 1   | 7.93 | 330565 | 17043  | 100.000 |
|     |      | 330565 | 17043  | 100.000 |

Peak rejection level: 5000

Fig S184. HPLC analysis of the co-injection of the crystal recovered from the X-ray analysis (IC18028, CCDC 1488798) and the (–)-**3i**.

**D-2000 Elite HPLC System Manager Report**Analyzed Date and Time: 07/04/2016  
08:39 PMReported Date and Time: 07/04/2016  
09:07 PMProcessed Date and Time: 07/04/2016  
09:06 PM

Data Path: D:\Arun\DATA\0524\

Processing Method: test-THF/Hx-Final II

System (acquisition): Sys 1

Series: 0524

Application(data): Arun

Vial Number: 1

Sample Name: CHP-8g-F2 (IC18028-1)

Vial Type: UNK

Injection from this vial: 1 of 1

Volume: 20.0 ul

Sample Description: 25%THF+HX 1.0 mL/MIN COL-IC

Chrom Type: Fixed WL Chromatogram, 254 nm

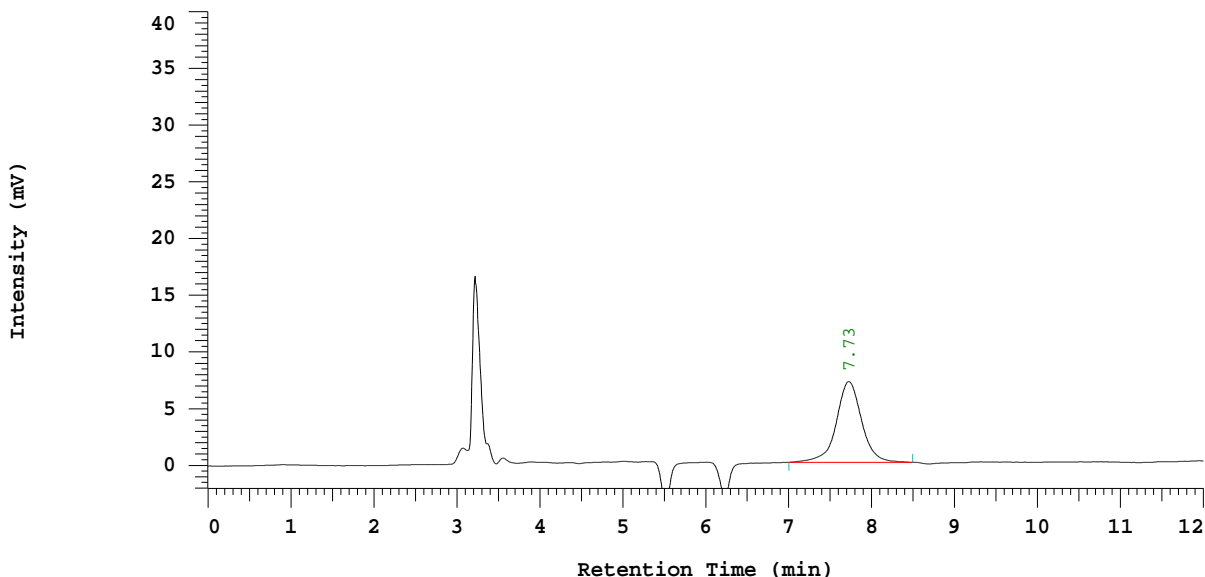

Processing Method: test-THF/Hx-Final II

Column Type: IC

Method Developer: ARUN

Method Description:

Chrom Type: Fixed WL Chromatogram, 254 nm

Peak Quantitation: AREA

Calculation Method: EXT-STD

Scale Factor 1: 1.000

| No. | RT   | Area   | Height | Area %  |
|-----|------|--------|--------|---------|
| 1   | 7.73 | 151145 | 7119   | 100.000 |
|     |      | 151145 | 7119   | 100.000 |

Peak rejection level: 5000

Fig S185. HPLC analysis of the crystal recovered from the X-ray analysis (IC18028-1, CCDC 1488808)

**D-2000 Elite HPLC System Manager Report**Analyzed Date and Time: 06/26/2016  
04:55 PMReported Date and Time: 07/01/2016  
12:48 PMProcessed Date and Time: 07/01/2016  
12:48 PM

Data Path: D:\Arun\DATA\0484\

Processing Method: test-THF/Hx-Final II

System (acquisition): Sys 1

Series: 0484

Application(data): Arun

Vial Number: 5

Sample Name: CHP-8g-F2 (Crys 5)

Vial Type: UNK

Injection from this vial: 1 of 1

Volume: 20.0 ul

Sample Description: 25%THF+HX 1.0 mL/MIN COL-IC

Chrom Type: Fixed WL Chromatogram, 254 nm

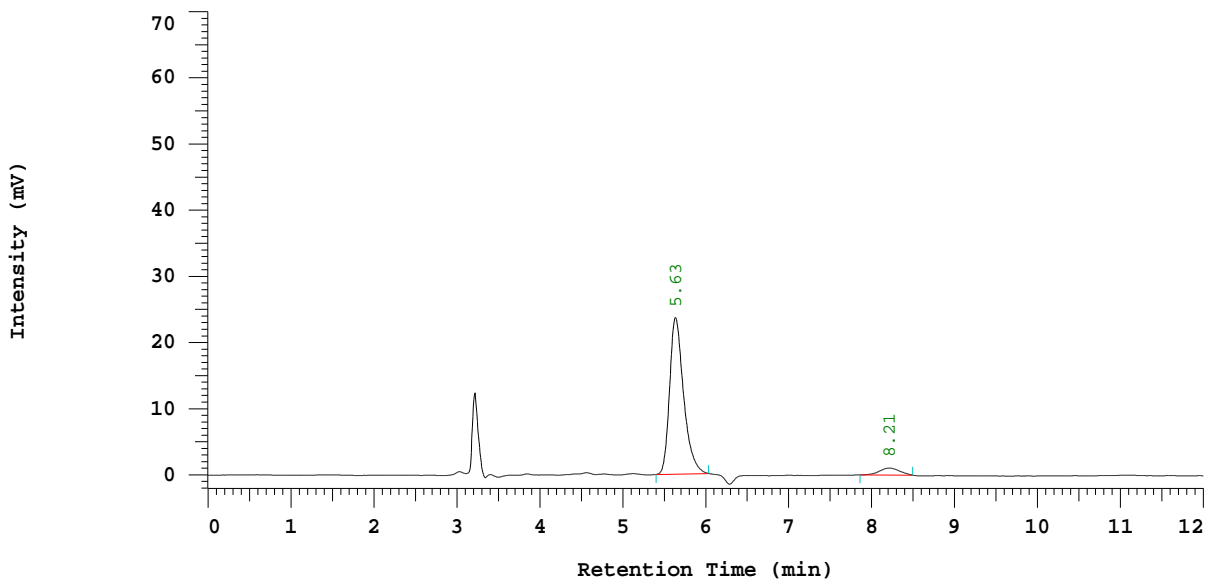

Processing Method: test-THF/Hx-Final II

Column Type: IC

Method Developer: ARUN

Method Description:

Chrom Type: Fixed WL Chromatogram, 254 nm

Peak Quantitation: AREA

Calculation Method: EXT-STD

Scale Factor 1: 1.000

| No. | RT   | Area   | Height | Area %  |
|-----|------|--------|--------|---------|
| 1   | 5.63 | 277123 | 23648  | 93.859  |
| 2   | 8.21 | 18130  | 1064   | 6.141   |
|     |      | 295253 | 24712  | 100.000 |

Peak rejection level: 5000

Fig S186. HPLC analysis of a crystal **3i** obtained with chiral enriched (crystal count number 1).

**D-2000 Elite HPLC System Manager Report**Analyzed Date and Time: 06/29/2016  
05:08 PMReported Date and Time: 07/01/2016  
12:19 PMProcessed Date and Time: 07/01/2016  
12:19 PM

Data Path: D:\Arun\DATA\0502\

Processing Method: test-THF/Hx-Final II

System (acquisition): Sys 1

Series: 0502

Application(data): Arun

Vial Number: 1

Sample Name: CHP-8g-F2 (Crys 1)

Vial Type: UNK

Injection from this vial: 1 of 1

Volume: 20.0 ul

Sample Description: 25%THF+HX 1.0 mL/MIN COL-IC

Chrom Type: Fixed WL Chromatogram, 254 nm

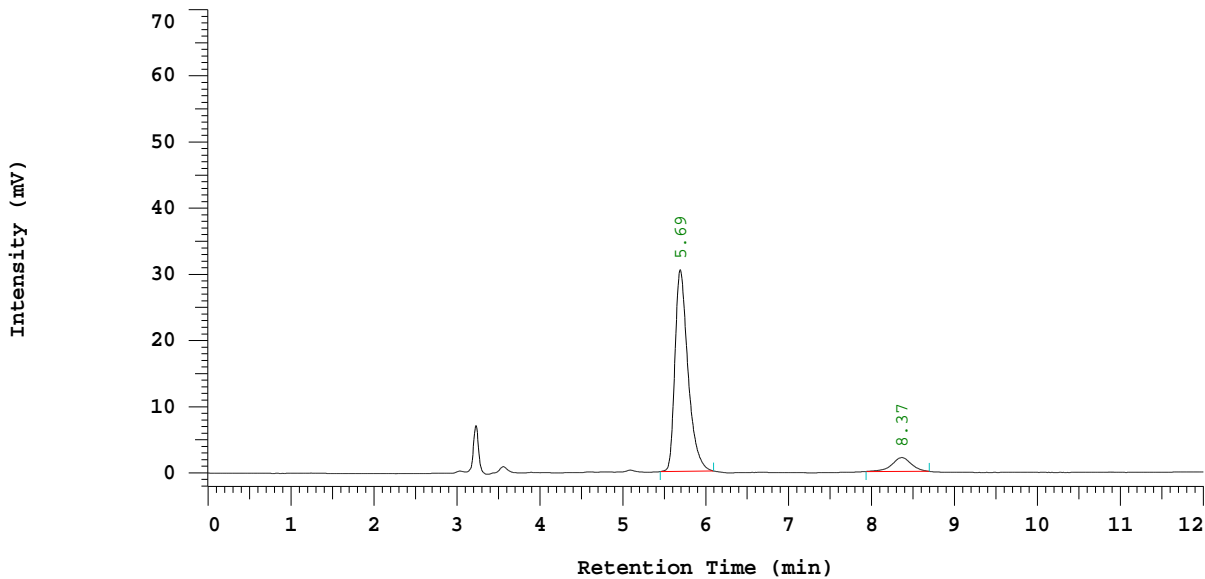

Processing Method: test-THF/Hx-Final II

Column Type: IC

Method Developer: ARUN

Method Description:

Chrom Type: Fixed WL Chromatogram, 254 nm

Peak Quantitation: AREA

Calculation Method: EXT-STD

Scale Factor 1: 1.000

| No. | RT   | Area   | Height | Area %  |
|-----|------|--------|--------|---------|
| 1   | 5.69 | 332157 | 30486  | 90.707  |
| 2   | 8.37 | 34029  | 2085   | 9.293   |
|     |      | 366186 | 32571  | 100.000 |

Peak rejection level: 5000

Fig S187. HPLC analysis of a crystal 3i obtained with chiral enriched (crystal count number 2).

**D-2000 Elite HPLC System Manager Report**Analyzed Date and Time: 06/23/2016  
05:21 PMReported Date and Time: 07/01/2016  
01:16 PMProcessed Date and Time: 07/01/2016  
01:16 PM

Data Path: D:\Arun\DATA\0467\

Processing Method: test-THF/Hx-Final II

System (acquisition): Sys 1

Series: 0467

Application(data): Arun

Vial Number: 1

Sample Name: CHP-8g-F2 (Crystal 1)

Vial Type: UNK

Injection from this vial: 1 of 1

Volume: 20.0 ul

Sample Description: 25%THF+HX 1.0 mL/MIN COL-IC

Chrom Type: Fixed WL Chromatogram, 254 nm

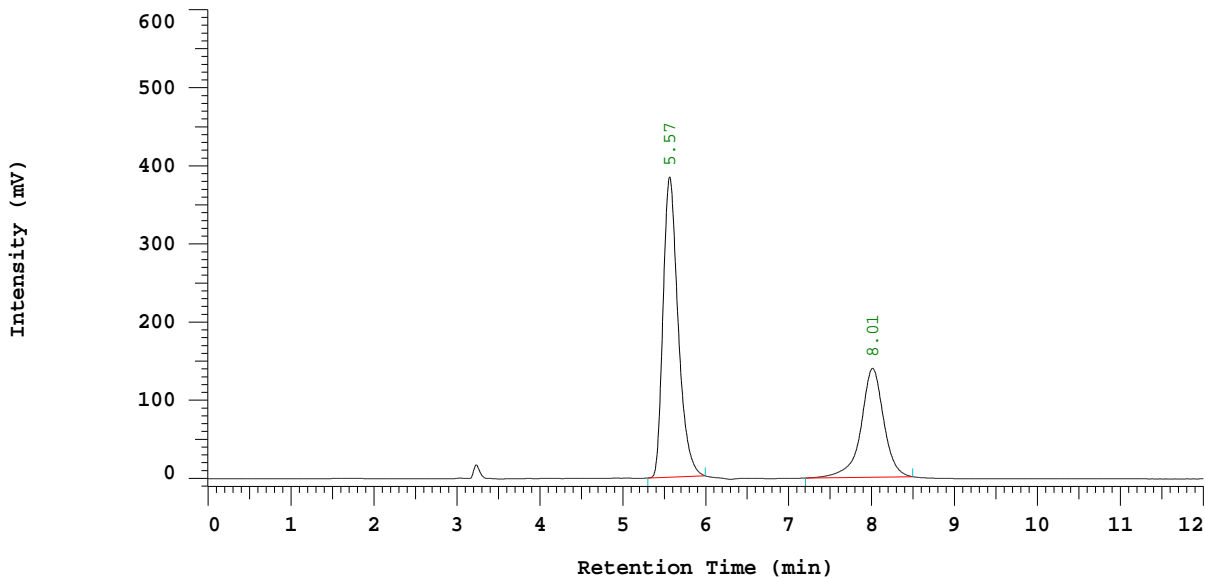

Processing Method: test-THF/Hx-Final II

Column Type: IC

Method Developer: ARUN

Method Description:

Chrom Type: Fixed WL Chromatogram, 254 nm

Peak Quantitation: AREA

Calculation Method: EXT-STD

Scale Factor 1: 1.000

| No. | RT   | Area    | Height | Area %  |
|-----|------|---------|--------|---------|
| 1   | 5.57 | 4845292 | 384221 | 64.647  |
| 2   | 8.01 | 2649724 | 139303 | 35.353  |
|     |      | 7495016 | 523524 | 100.000 |

Peak rejection level: 5000

Fig S188. HPLC analysis of a crystal **3i** obtained with low ee (crystal count number 1).



**D-2000 Elite HPLC System Manager Report**Analyzed Date and Time: 06/26/2016  
04:41 PMReported Date and Time: 07/01/2016  
12:50 PMProcessed Date and Time: 07/01/2016  
12:50 PM

Data Path: D:\Arun\DATA\0483\

Processing Method: test-THF/Hx-Final II

System (acquisition): Sys 1

Series: 0483

Application(data): Arun

Vial Number: 4

Sample Name: CHP-8g-F2 (Crys 4)

Vial Type: UNK

Injection from this vial: 1 of 1

Volume: 20.0 ul

Sample Description: 25%THF+HX 1.0 mL/MIN COL-IC

Chrom Type: Fixed WL Chromatogram, 254 nm

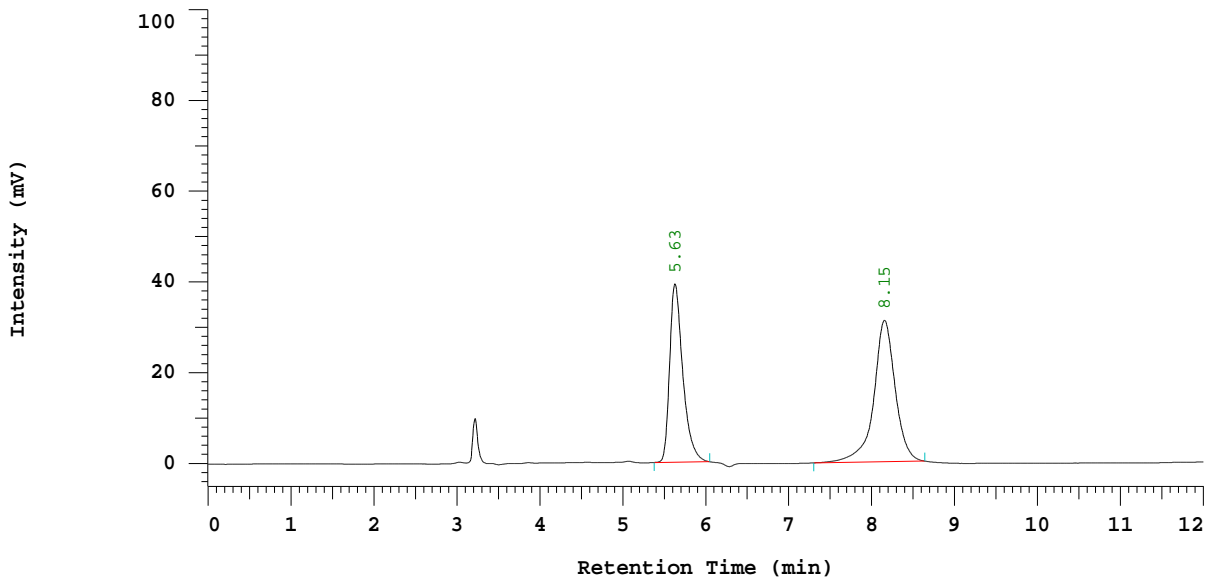

Processing Method: test-THF/Hx-Final II

Column Type: IC

Method Developer: ARUN

Method Description:

Chrom Type: Fixed WL Chromatogram, 254 nm

Peak Quantitation: AREA

Calculation Method: EXT-STD

Scale Factor 1: 1.000

| No. | RT   | Area   | Height | Area %  |
|-----|------|--------|--------|---------|
| 1   | 5.63 | 432836 | 39300  | 43.534  |
| 2   | 8.15 | 561421 | 31154  | 56.466  |
|     |      | 994257 | 70454  | 100.000 |

Peak rejection level: 5000

Fig S189. HPLC analysis of a crystal **3i** obtained with low ee (crystal count number 2).

**D-2000 Elite HPLC System Manager Report**Analyzed Date and Time: 06/27/2016  
04:05 PMReported Date and Time: 07/01/2016  
12:46 PMProcessed Date and Time: 07/01/2016  
12:46 PM

Data Path: D:\Arun\DATA\0485\

Processing Method: test-THF/Hx-Final II

System (acquisition): Sys 1

Series: 0485

Application(data): Arun

Vial Number: 1

Sample Name: CHP-8g-F2 (Crys 1)

Vial Type: UNK

Injection from this vial: 1 of 1

Volume: 20.0 ul

Sample Description: 25%THF+HX 1.0 mL/MIN COL-IC

Chrom Type: Fixed WL Chromatogram, 254 nm

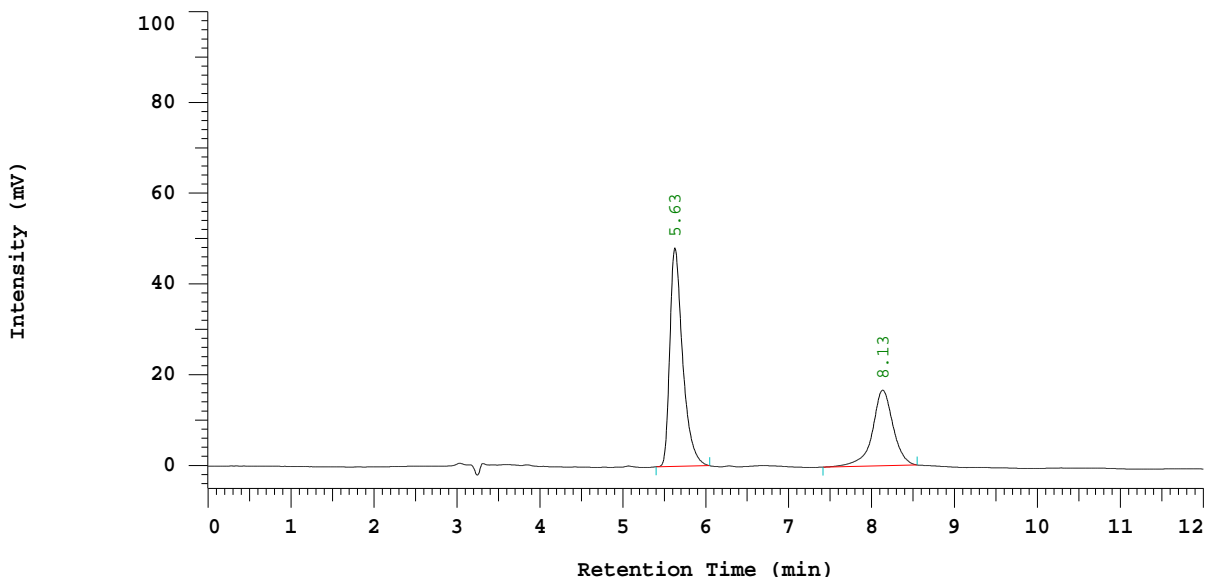

Processing Method: test-THF/Hx-Final II

Column Type: IC

Method Developer: ARUN

Method Description:

Chrom Type: Fixed WL Chromatogram, 254 nm

Peak Quantitation: AREA

Calculation Method: EXT-STD

Scale Factor 1: 1.000

| No. | RT   | Area   | Height | Area %  |
|-----|------|--------|--------|---------|
| 1   | 5.63 | 516846 | 48139  | 64.117  |
| 2   | 8.13 | 289258 | 16679  | 35.883  |
|     |      | 806104 | 64818  | 100.000 |

Peak rejection level: 5000

Fig S190. HPLC analysis of a crystal **3i** obtained with low ee (crystal count number 3).

**D-2000 Elite HPLC System Manager Report**Analyzed Date and Time: 06/27/2016  
05:00 PMReported Date and Time: 07/01/2016  
12:40 PMProcessed Date and Time: 07/01/2016  
12:40 PM

Data Path: D:\Arun\DATA\0489\

Processing Method: test-THF/Hx-Final II

System (acquisition): Sys 1

Series: 0489

Application(data): Arun

Vial Number: 5

Sample Name: CHP-8g-F2 (Crys 5)

Vial Type: UNK

Injection from this vial: 1 of 1

Volume: 20.0 ul

Sample Description: 25%THF+HX 1.0 mL/MIN COL-IC

Chrom Type: Fixed WL Chromatogram, 254 nm

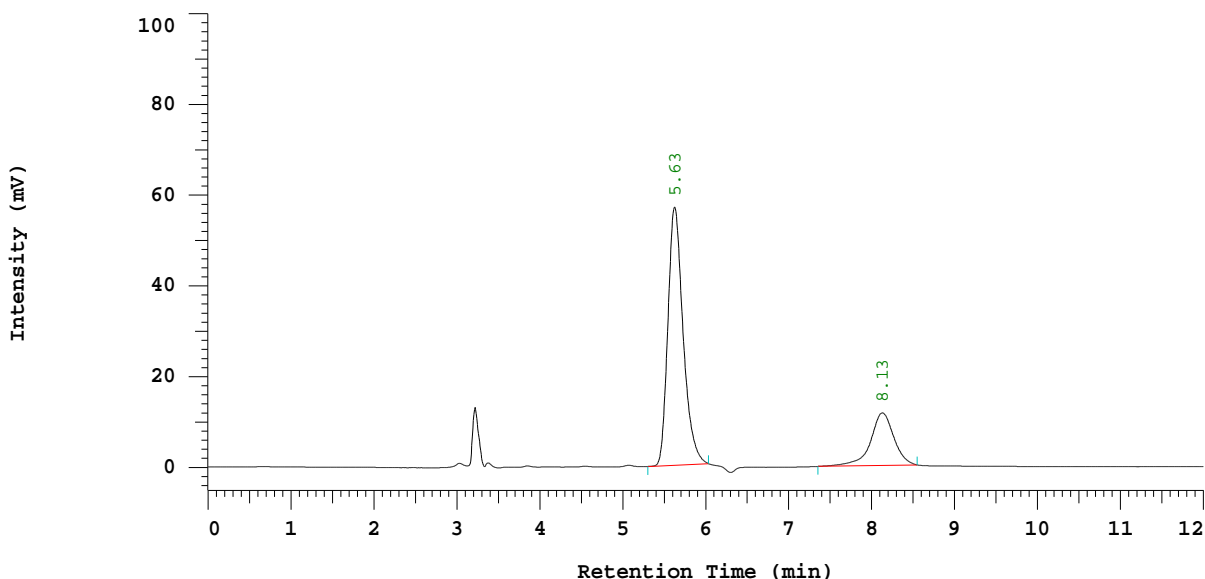

Processing Method: test-THF/Hx-Final II

Column Type: IC

Method Developer: ARUN

Method Description:

Chrom Type: Fixed WL Chromatogram, 254 nm

Peak Quantitation: AREA

Calculation Method: EXT-STD

Scale Factor 1: 1.000

| No. | RT   | Area   | Height | Area %  |
|-----|------|--------|--------|---------|
| 1   | 5.63 | 723288 | 56910  | 76.120  |
| 2   | 8.13 | 226909 | 11587  | 23.880  |
|     |      | 950197 | 68497  | 100.000 |

Peak rejection level: 5000

Fig S191. HPLC analysis of a crystal **3i** obtained with low ee (crystal count number 4).

**D-2000 Elite HPLC System Manager Report**Analyzed Date and Time: 06/27/2016  
05:48 PMReported Date and Time: 07/01/2016  
12:34 PMProcessed Date and Time: 07/01/2016  
12:34 PM

Data Path: D:\Arun\DATA\0492\

Processing Method: test-THF/Hx-Final II

System (acquisition): Sys 1

Series: 0492

Application(data): Arun

Vial Number: 3

Sample Name: CHP-8g-F2 (Crys 3)

Vial Type: UNK

Injection from this vial: 1 of 1

Volume: 20.0 ul

Sample Description: 25%THF+HX 1.0 mL/MIN COL-IC

Chrom Type: Fixed WL Chromatogram, 254 nm

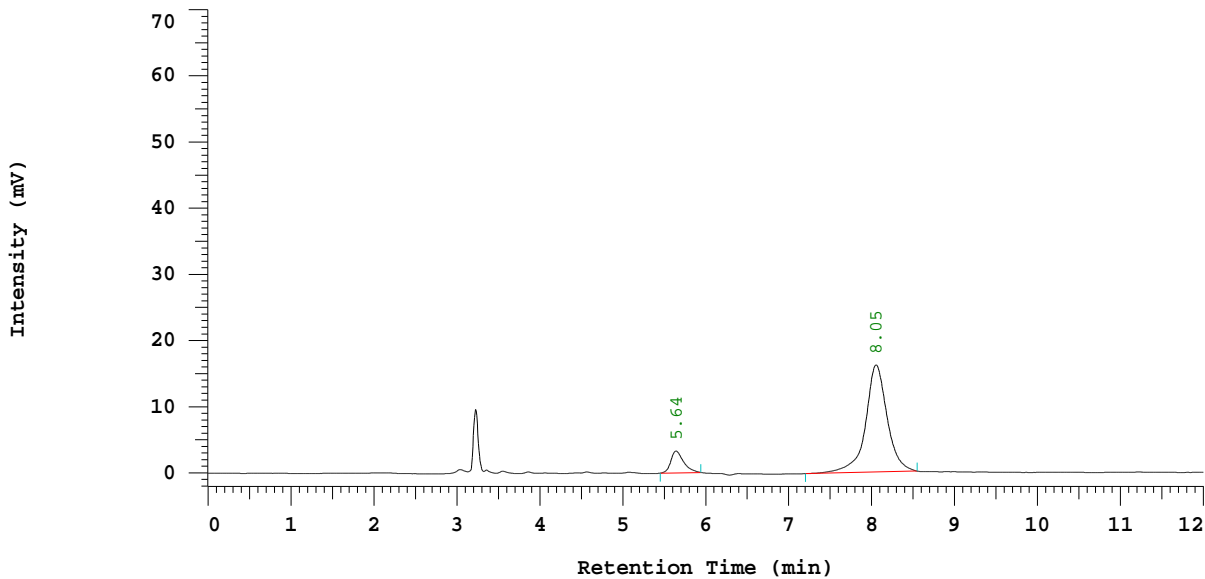

Processing Method: test-THF/Hx-Final II

Column Type: IC

Method Developer: ARUN

Method Description:

Chrom Type: Fixed WL Chromatogram, 254 nm

Peak Quantitation: AREA

Calculation Method: EXT-STD

Scale Factor 1: 1.000

| No. | RT   | Area   | Height | Area %  |
|-----|------|--------|--------|---------|
| 1   | 5.64 | 35093  | 3289   | 10.672  |
| 2   | 8.05 | 293735 | 16188  | 89.328  |
|     |      | 328828 | 19477  | 100.000 |

Peak rejection level: 5000

Fig S192. HPLC analysis of a crystal **3i** obtained with low ee (crystal count number 5).

**D-2000 Elite HPLC System Manager Report**Analyzed Date and Time: 06/29/2016  
04:01 PMReported Date and Time: 07/01/2016  
12:27 PMProcessed Date and Time: 07/01/2016  
12:27 PM

Data Path: D:\Arun\DATA\0497\

Processing Method: test-THF/Hx-Final II

System (acquisition): Sys 1

Series: 0497

Application(data): Arun

Vial Number: 1

Sample Name: CHP-8g-F2 (Crys 1)

Vial Type: UNK

Injection from this vial: 1 of 1

Volume: 20.0 ul

Sample Description: 25%THF+HX 1.0 mL/MIN COL-IC

Chrom Type: Fixed WL Chromatogram, 254 nm

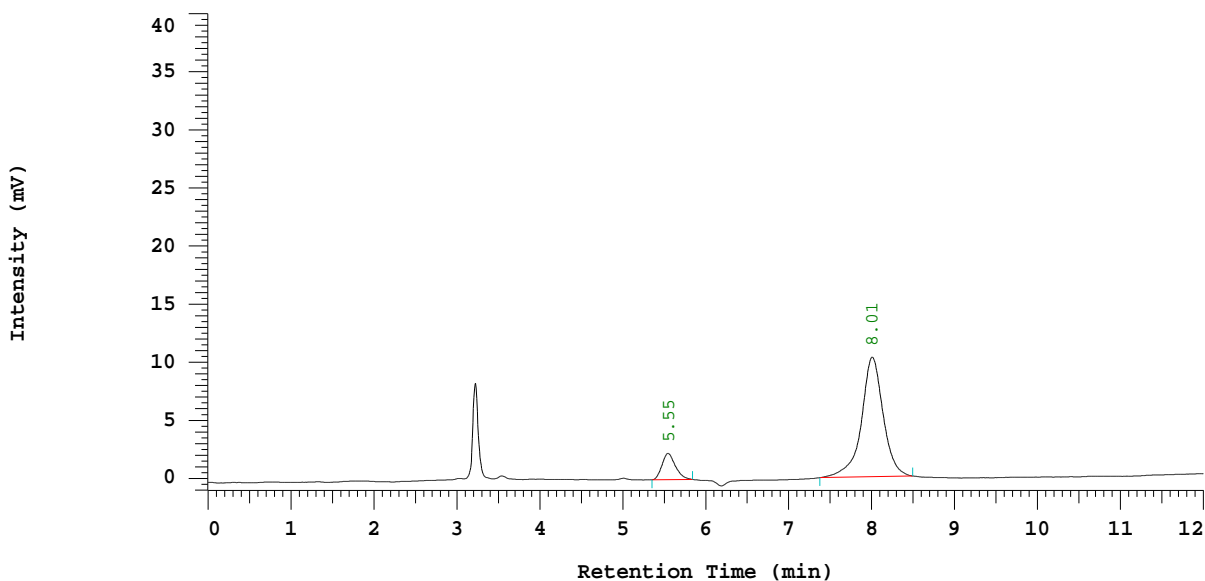

Processing Method: test-THF/Hx-Final II

Column Type: IC

Method Developer: ARUN

Method Description:

Chrom Type: Fixed WL Chromatogram, 254 nm

Peak Quantitation: AREA

Calculation Method: EXT-STD

Scale Factor 1: 1.000

| No. | RT   | Area   | Height | Area %  |
|-----|------|--------|--------|---------|
| 1   | 5.55 | 25275  | 2257   | 11.866  |
| 2   | 8.01 | 187727 | 10277  | 88.134  |
|     |      | 213002 | 12534  | 100.000 |

Peak rejection level: 5000

Fig S193. HPLC analysis of a crystal **3i** obtained with low ee (crystal count number 6).

**D-2000 Elite HPLC System Manager Report**

Analyzed Date and Time: 06/30/2016  
04:30 PM

Reported Date and Time: 07/01/2016  
12:02 PM

Processed Date and Time: 07/01/2016  
12:01 PM

Data Path: D:\Arun\DATA\0513\

Processing Method: test-THF/Hx-Final II

System (acquisition): Sys 1

Series: 0513

Application(data): Arun

Vial Number: 4

Sample Name: CHP-8g-F2 (Crys 4)

Vial Type: UNK

Injection from this vial: 1 of 1

Volume: 20.0 ul

Sample Description: 25%THF+HX 1.0 mL/MIN COL-IC

Chrom Type: Fixed WL Chromatogram, 254 nm

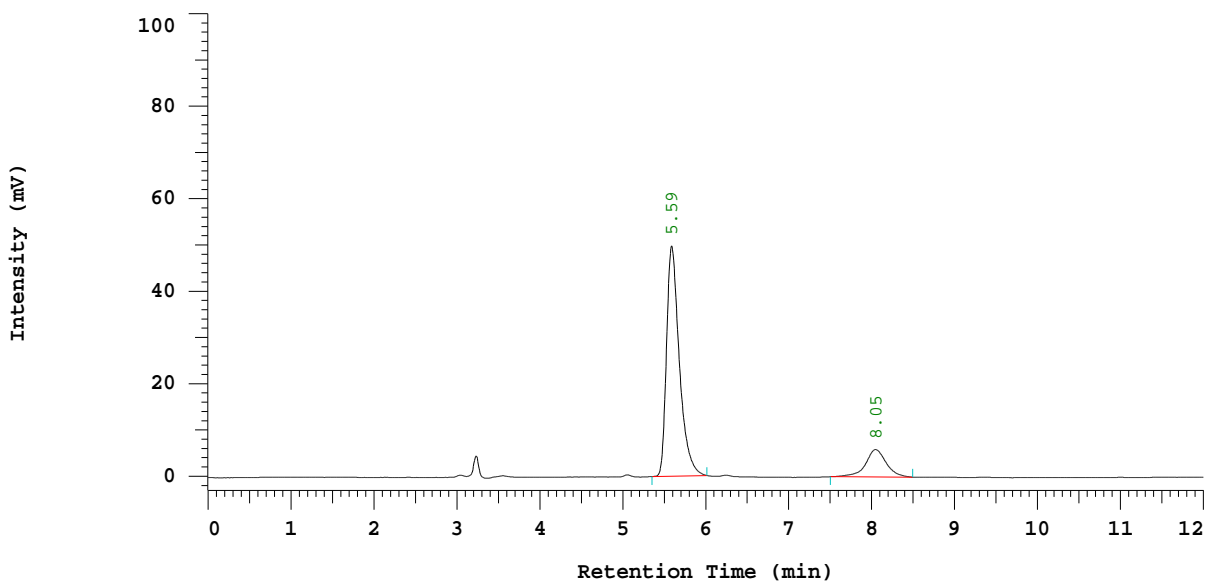

Processing Method: test-THF/Hx-Final II

Column Type: IC

Method Developer: ARUN

Method Description:

Chrom Type: Fixed WL Chromatogram, 254 nm

Peak Quantitation: AREA

Calculation Method: EXT-STD

Scale Factor 1: 1.000

| No. | RT   | Area   | Height | Area %  |
|-----|------|--------|--------|---------|
| 1   | 5.59 | 534229 | 49723  | 83.775  |
| 2   | 8.05 | 103463 | 5932   | 16.225  |
|     |      | 637692 | 55655  | 100.000 |

Peak rejection level: 5000

Fig S194. HPLC analysis of a crystal **3i** obtained with low ee (crystal count number 7).

**D-2000 Elite HPLC System Manager Report**Analyzed Date and Time: 06/29/2016  
05:21 PMReported Date and Time: 07/01/2016  
12:17 PMProcessed Date and Time: 07/01/2016  
12:17 PM

Data Path: D:\Arun\DATA\0503\

Processing Method: test-THF/Hx-Final II

System (acquisition): Sys 1

Series: 0503

Application(data): Arun

Vial Number: 2

Sample Name: CHP-8g-F2 (Crys 2)

Vial Type: UNK

Injection from this vial: 1 of 1

Volume: 20.0 ul

Sample Description: 25%THF+HX 1.0 mL/MIN COL-IC

Chrom Type: Fixed WL Chromatogram, 254 nm

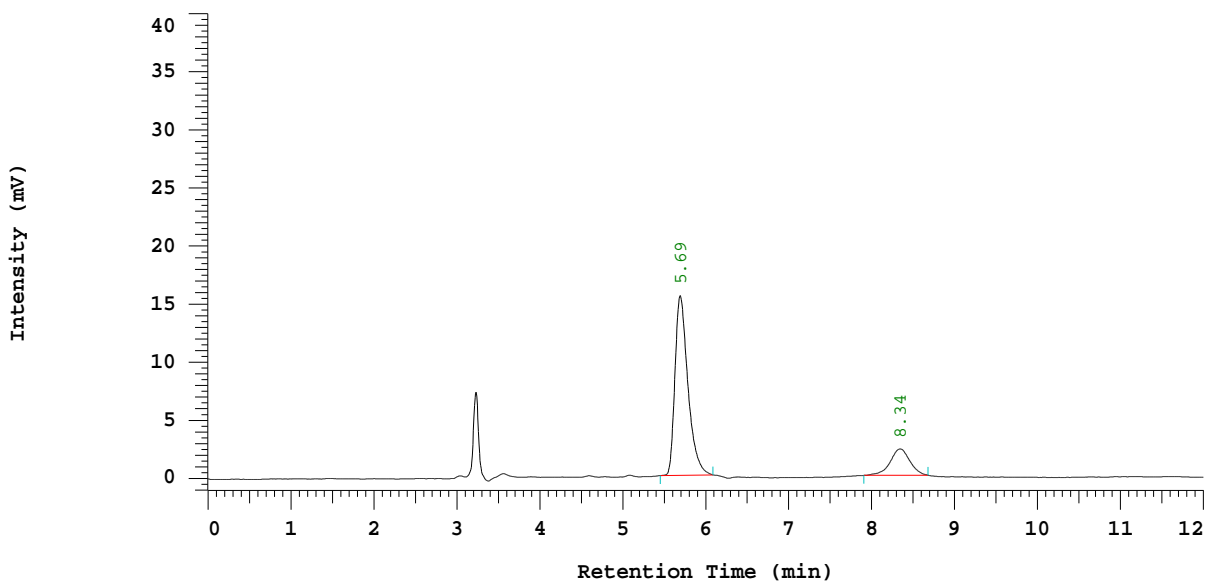

Processing Method: test-THF/Hx-Final II

Column Type: IC

Method Developer: ARUN

Method Description:

Chrom Type: Fixed WL Chromatogram, 254 nm

Peak Quantitation: AREA

Calculation Method: EXT-STD

Scale Factor 1: 1.000

| No. | RT   | Area   | Height | Area %  |
|-----|------|--------|--------|---------|
| 1   | 5.69 | 167329 | 15446  | 81.733  |
| 2   | 8.34 | 37396  | 2266   | 18.267  |
|     |      | 204725 | 17712  | 100.000 |

Peak rejection level: 5000

Fig S195. HPLC analysis of a crystal **3i** obtained with low ee (crystal count number 8).

**D-2000 Elite HPLC System Manager Report**Analyzed Date and Time: 06/24/2016  
01:17 PMReported Date and Time: 07/01/2016  
01:00 PMProcessed Date and Time: 07/01/2016  
01:00 PM

Data Path: D:\Arun\DATA\0478\

Processing Method: test-THF/Hx-Final II

System (acquisition): Sys 1

Series: 0478

Application(data): Arun

Vial Number: 5

Sample Name: CHP-8g-F2 (Crys 5)

Vial Type: UNK

Injection from this vial: 1 of 1

Volume: 20.0 ul

Sample Description: 25%THF+HX 1.0 mL/MIN COL-IC

Chrom Type: Fixed WL Chromatogram, 254 nm

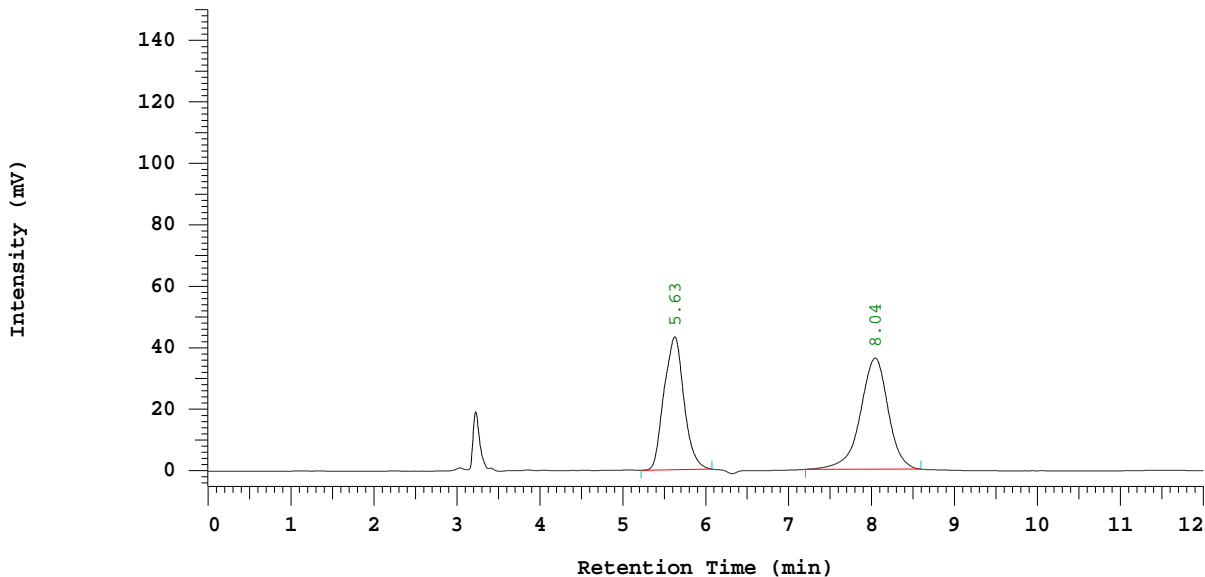

Processing Method: test-THF/Hx-Final II

Column Type: IC

Method Developer: ARUN

Method Description:

Chrom Type: Fixed WL Chromatogram, 254 nm

Peak Quantitation: AREA

Calculation Method: EXT-STD

Scale Factor 1: 1.000

| No. | RT   | Area    | Height | Area %  |
|-----|------|---------|--------|---------|
| 1   | 5.63 | 721768  | 43285  | 46.139  |
| 2   | 8.04 | 842566  | 36161  | 53.861  |
|     |      | 1564334 | 79446  | 100.000 |

Peak rejection level: 5000

Fig S196. HPLC analysis of a crystal **3i** obtained with very low ee (crystal count number 1).



**D-2000 Elite HPLC System Manager Report**Analyzed Date and Time: 06/23/2016  
06:11 PMReported Date and Time: 07/01/2016  
01:12 PMProcessed Date and Time: 07/01/2016  
01:11 PM

Data Path: D:\Arun\DATA\0470\

Processing Method: test-THF/Hx-Final II

System (acquisition): Sys 1

Series: 0470

Application(data): Arun

Vial Number: 1

Sample Name: CHP-8g-F2 (Crystal 4)

Vial Type: UNK

Injection from this vial: 1 of 1

Volume: 20.0 ul

Sample Description: 25%THF+HX 1.0 mL/MIN COL-IC

Chrom Type: Fixed WL Chromatogram, 254 nm

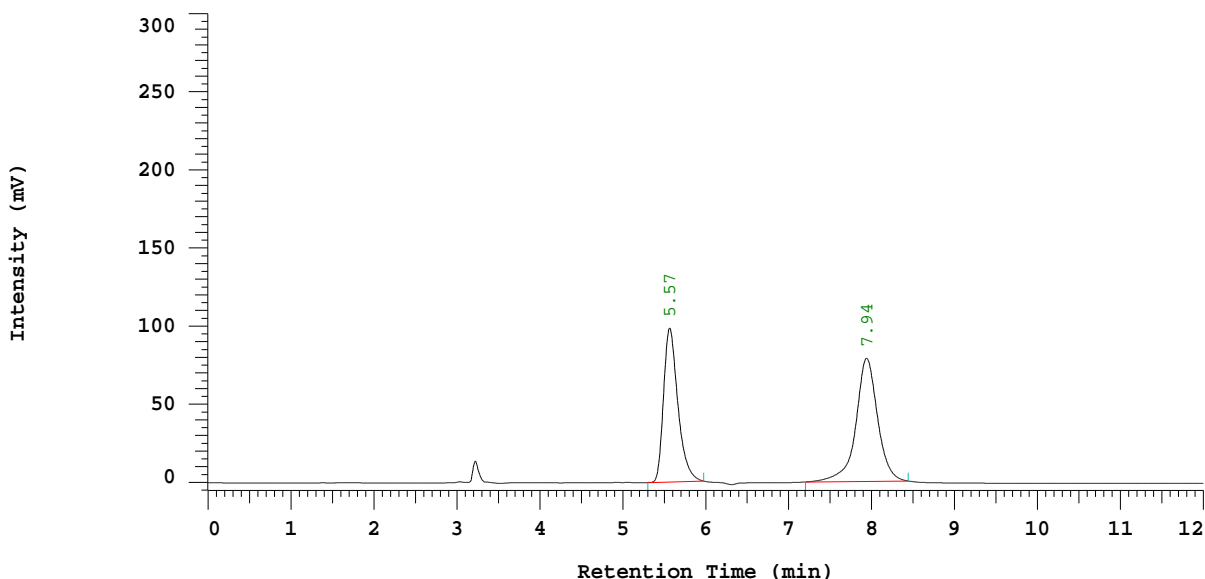

Processing Method: test-THF/Hx-Final II

Column Type: IC

Method Developer: ARUN

Method Description:

Chrom Type: Fixed WL Chromatogram, 254 nm

Peak Quantitation: AREA

Calculation Method: EXT-STD

Scale Factor 1: 1.000

| No. | RT   | Area    | Height | Area %  |
|-----|------|---------|--------|---------|
| 1   | 5.57 | 1180654 | 98373  | 45.116  |
| 2   | 7.94 | 1436277 | 78794  | 54.884  |
|     |      | 2616931 | 177167 | 100.000 |

Peak rejection level: 5000

Fig S197. HPLC analysis of a crystal **3i** obtained with very low ee (crystal count number 2).

**D-2000 Elite HPLC System Manager Report**Analyzed Date and Time: 06/30/2016  
04:42 PMReported Date and Time: 07/01/2016  
12:00 PMProcessed Date and Time: 07/01/2016  
12:00 PM

Data Path: D:\Arun\DATA\0514\

Processing Method: test-THF/Hx-Final II

System (acquisition): Sys 1

Series: 0514

Application(data): Arun

Vial Number: 5

Sample Name: CHP-8g-F2 (Crys 5)

Vial Type: UNK

Injection from this vial: 1 of 1

Volume: 20.0 ul

Sample Description: 25%THF+HX 1.0 mL/MIN COL-IC

Chrom Type: Fixed WL Chromatogram, 254 nm

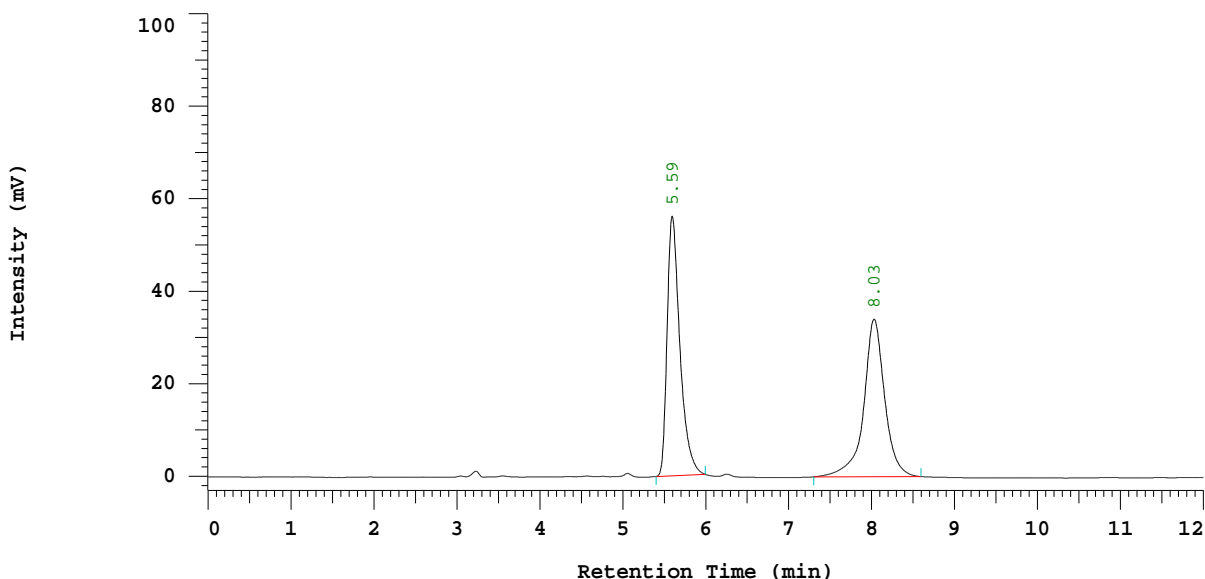

Processing Method: test-THF/Hx-Final II

Column Type: IC

Method Developer: ARUN

Method Description:

Chrom Type: Fixed WL Chromatogram, 254 nm

Peak Quantitation: AREA

Calculation Method: EXT-STD

Scale Factor 1: 1.000

| No. | RT   | Area    | Height | Area %  |
|-----|------|---------|--------|---------|
| 1   | 5.59 | 600148  | 56147  | 50.073  |
| 2   | 8.03 | 598406  | 34061  | 49.927  |
|     |      | 1198554 | 90208  | 100.000 |

Peak rejection level: 5000

Fig S198. HPLC analysis of a crystal **3i** obtained with racemic mixture (crystal count number 1).

**D-2000 Elite HPLC System Manager Report**

Analyzed Date and Time: 06/30/2016  
05:37 PM

Reported Date and Time: 07/01/2016  
11:52 AM

Processed Date and Time: 07/01/2016  
11:51 AM

Data Path: D:\Arun\DATA\0518\

Processing Method: test-THF/Hx-Final II

System (acquisition): Sys 1

Series: 0518

Application(data): Arun

Vial Number: 4

Sample Name: CHP-8g-F2 (Crys 4)

Vial Type: UNK

Injection from this vial: 1 of 1

Volume: 20.0 ul

Sample Description: 25%THF+HX 1.0 mL/MIN COL-IC

Chrom Type: Fixed WL Chromatogram, 254 nm

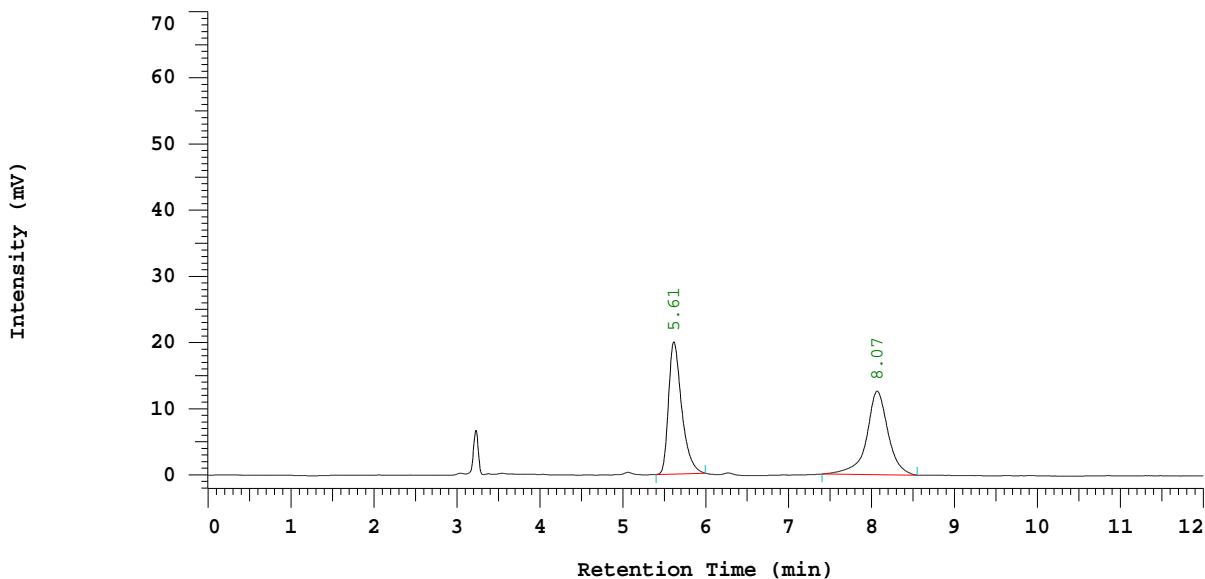

Processing Method: test-THF/Hx-Final II

Column Type: IC

Method Developer: ARUN

Method Description:

Chrom Type: Fixed WL Chromatogram, 254 nm

Peak Quantitation: AREA

Calculation Method: EXT-STD

Scale Factor 1: 1.000

| No. | RT   | Area   | Height | Area %  |
|-----|------|--------|--------|---------|
| 1   | 5.61 | 220086 | 19960  | 49.292  |
| 2   | 8.07 | 226410 | 12632  | 50.708  |
|     |      | 446496 | 32592  | 100.000 |

Peak rejection level: 5000

Fig S199. HPLC analysis of a crystal **3i** obtained with racemic mixture (crystal count number 2).

**D-2000 Elite HPLC System Manager Report**Analyzed Date and Time: 06/27/2016  
05:22 PMReported Date and Time: 07/01/2016  
12:38 PMProcessed Date and Time: 07/01/2016  
12:37 PM

Data Path: D:\Arun\DATA\0490\

Processing Method: test-THF/Hx-Final II

System (acquisition): Sys 1

Series: 0490

Application(data): Arun

Vial Number: 1

Sample Name: CHP-8g-F2 (Crys 1)

Vial Type: UNK

Injection from this vial: 1 of 1

Volume: 20.0 ul

Sample Description: 25%THF+HX 1.0 mL/MIN COL-IC

Chrom Type: Fixed WL Chromatogram, 254 nm

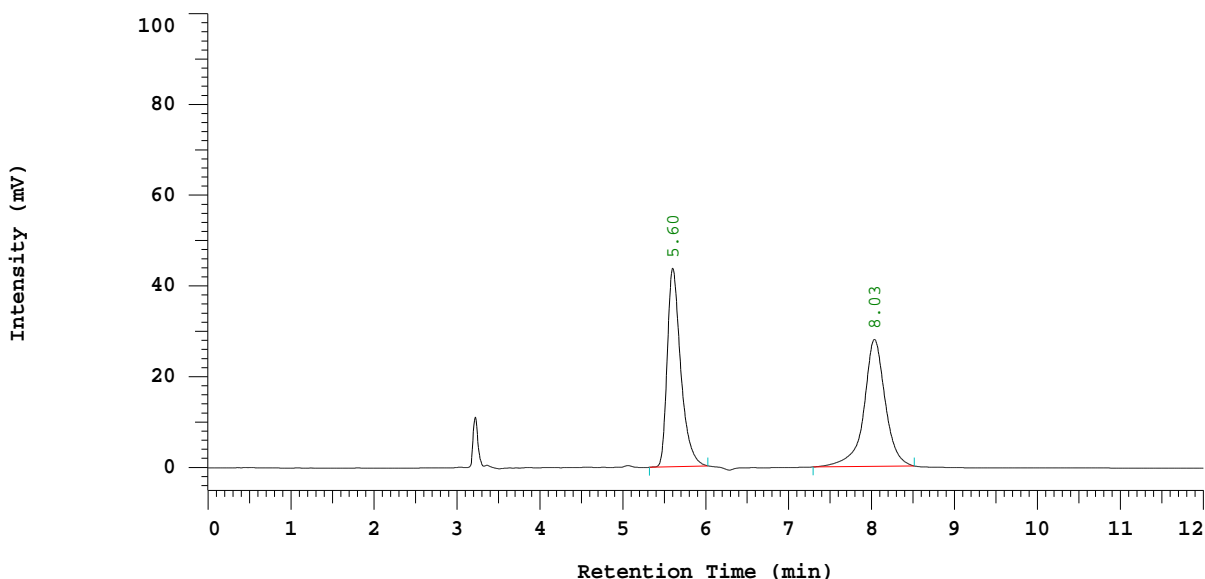

Processing Method: test-THF/Hx-Final II

Column Type: IC

Method Developer: ARUN

Method Description:

Chrom Type: Fixed WL Chromatogram, 254 nm

Peak Quantitation: AREA

Calculation Method: EXT-STD

Scale Factor 1: 1.000

| No. | RT   | Area   | Height | Area %  |
|-----|------|--------|--------|---------|
| 1   | 5.60 | 493609 | 43720  | 49.641  |
| 2   | 8.03 | 500748 | 27998  | 50.359  |
|     |      | 994357 | 71718  | 100.000 |

Peak rejection level: 5000

Fig S200. HPLC analysis of a crystal **3i** obtained with racemic mixture (crystal count number 3).

**D-2000 Elite HPLC System Manager Report**Analyzed Date and Time: 06/24/2016  
01:04 PMReported Date and Time: 07/01/2016  
01:03 PMProcessed Date and Time: 07/01/2016  
01:03 PM

Data Path: D:\Arun\DATA\0477\

Processing Method: test-THF/Hx-Final II

System (acquisition): Sys 1

Series: 0477

Application(data): Arun

Vial Number: 4

Sample Name: CHP-8g-F2 (Crys 4)

Vial Type: UNK

Injection from this vial: 1 of 1

Volume: 20.0 ul

Sample Description: 25%THF+HX 1.0 mL/MIN COL-IC

Chrom Type: Fixed WL Chromatogram, 254 nm

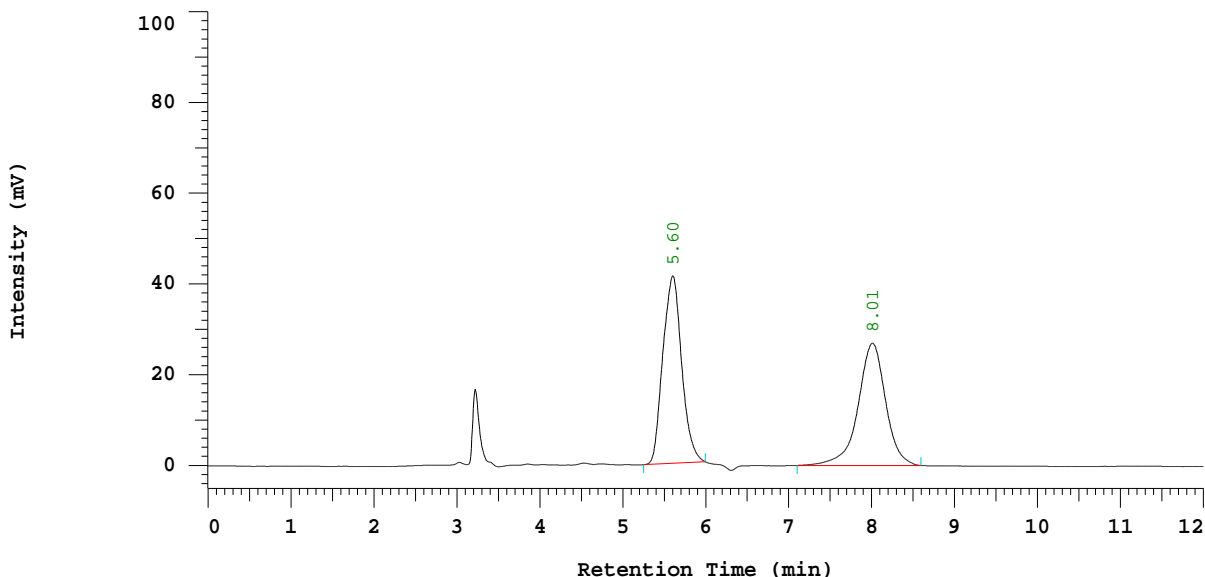

Processing Method: test-THF/Hx-Final II

Column Type: IC

Method Developer: ARUN

Method Description:

Chrom Type: Fixed WL Chromatogram, 254 nm

Peak Quantitation: AREA

Calculation Method: EXT-STD

Scale Factor 1: 1.000

| No. | RT   | Area    | Height | Area %  |
|-----|------|---------|--------|---------|
| 1   | 5.60 | 650641  | 41299  | 51.122  |
| 2   | 8.01 | 622071  | 26912  | 48.878  |
|     |      | 1272712 | 68211  | 100.000 |

Peak rejection level: 5000

Fig S201. HPLC analysis of a crystal **3i** obtained with racemic mixture (crystal count number 4).
